# Supplementary material for: Regional trade of medicinal plants has facilitated the retention of traditional knowledge: case study in Gilgit-Baltistan Pakistan
Source: J Ethnobiol Ethnomed. 2019 Jan 28;15:6. doi: 10.1186/s13002-018-0281-0 (PMC6348662; doi:10.1186/s13002-018-0281-0)
Supplement: Supplementary file 1 — Primary data on medicinal plants and their uses collected during the field survey. (XLSX 636 kb) [file 13002_2018_281_MOESM1_ESM.xlsx]

## Sheet: S1_Primary data
Data on medicinal plants collected during the field survey
village	District	Latitude	Longitude	local name	species name	family	Part used	# of uses	Mode of use	floristic composition/habit/life form	wounds	skin infections	pain relief	Kidney and Uterus	diaphoretic	Others	cardiac stimulant	Stomach and intestine	asthma/breathing/respiratory/pulmonary	anti-inflammatory	cytoprotective	Cancers	HIV	hepatitis	anti-stress/hypertension	hepatoprotective/liver	Ear Nose and Throat	Menses/diseases	brain and nervous disorders	Weight loss and fat reduction	Eye diseases	diabetes	Teeth and gums	blood purifier/diseases	Vomiting/nausea/altitude sickness	livestock diseases	sexual diseases/stimulant	hemorrhoids/piles	maternal health
Bilchar/Bagrote	Gilgit	35.942517°	74.545274°	Bhindi	Abelmoschus esculentus (L.) Moench	Malvaceae	seed, fruit	1	Infusion	Shrub	0	0	1	0	0	0	0	0	0	0	0	0	0	0	0	0	0	0	0	0	0	0	0	0	0	0	0	0	0
Bilchar/Bagrote	Gilgit	35.942517°	74.545274°	Bhindi	Abelmoschus esculentus (L.) Moench	Malvaceae	seed, fruit	1	Infusion	Shrub	0	0	1	0	0	0	0	0	0	0	0	0	0	0	0	0	0	0	0	0	0	0	0	0	0	0	0	0	0
Bilchar/Bagrote	Gilgit	35.942517°	74.545274°	Bhindi	Abelmoschus esculentus (L.) Moench	Malvaceae	seed, fruit	1	Infusion	Shrub	0	0	1	0	0	0	0	0	0	0	0	0	0	0	0	0	0	0	0	0	0	0	0	0	0	0	0	0	0
Bilchar/Bagrote	Gilgit	35.942517°	74.545274°	Bhindi	Abelmoschus esculentus (L.) Moench	Malvaceae	seed, fruit	1	Infusion	Shrub	0	0	1	0	0	0	0	0	0	0	0	0	0	0	0	0	0	0	0	0	0	0	0	0	0	0	0	0	0
Danyore	Gilgit	35.919880°	74.386181°	Bhindi	Abelmoschus esculentus (L.) Moench	Malvaceae	seed, fruit	1	Infusion	Shrub	0	0	1	0	0	0	0	0	0	0	0	0	0	0	0	0	0	0	0	0	0	0	0	0	0	0	0	0	0
Danyore	Gilgit	35.919880°	74.386181°	Bhindi	Abelmoschus esculentus (L.) Moench	Malvaceae	seed, fruit	1	Infusion	Shrub	0	0	1	0	0	0	0	0	0	0	0	0	0	0	0	0	0	0	0	0	0	0	0	0	0	0	0	0	0
Jalalabad	Gilgit	35.880457°	74.493590°	Bhindi	Abelmoschus esculentus (L.) Moench	Malvaceae	seed, fruit	1	Infusion	Shrub	0	0	1	0	0	0	0	0	0	0	0	0	0	0	0	0	0	0	0	0	0	0	0	0	0	0	0	0	0
Jalalabad	Gilgit	35.880457°	74.493590°	Bhindi	Abelmoschus esculentus (L.) Moench	Malvaceae	seed, fruit	1	Infusion	Shrub	0	0	1	0	0	0	0	0	0	0	0	0	0	0	0	0	0	0	0	0	0	0	0	0	0	0	0	0	0
Jalalabad	Gilgit	35.880457°	74.493590°	Bhindi	Abelmoschus esculentus (L.) Moench	Malvaceae	seed, fruit	1	Infusion	Shrub	0	0	1	0	0	0	0	0	0	0	0	0	0	0	0	0	0	0	0	0	0	0	0	0	0	0	0	0	0
Jalalabad	Gilgit	35.880457°	74.493590°	Bhindi	Abelmoschus esculentus (L.) Moench	Malvaceae	seed, fruit	1	Infusion	Shrub	0	0	1	0	0	0	0	0	0	0	0	0	0	0	0	0	0	0	0	0	0	0	0	0	0	0	0	0	0
Aliabad	Hunza	36.308563°	74.619496°	Bhindi	Abelmoschus esculentus (L.) Moench	Malvaceae	seed, fruit	1	Infusion	Shrub	0	0	1	0	0	0	0	0	0	0	0	0	0	0	0	0	0	0	0	0	0	0	0	0	0	0	0	0	0
Aliabad	Hunza	36.308563°	74.619496°	Bhindi	Abelmoschus esculentus (L.) Moench	Malvaceae	seed, fruit	1	Infusion	Shrub	0	0	1	0	0	0	0	0	0	0	0	0	0	0	0	0	0	0	0	0	0	0	0	0	0	0	0	0	0
Aliabad	Hunza	36.308563°	74.619496°	Bhindi	Abelmoschus esculentus (L.) Moench	Malvaceae	seed, fruit	1	Infusion	Shrub	0	0	1	0	0	0	0	0	0	0	0	0	0	0	0	0	0	0	0	0	0	0	0	0	0	0	0	0	0
Aliabad	Hunza	36.308563°	74.619496°	Bhindi	Abelmoschus esculentus (L.) Moench	Malvaceae	seed, fruit	1	Infusion	Shrub	0	0	1	0	0	0	0	0	0	0	0	0	0	0	0	0	0	0	0	0	0	0	0	0	0	0	0	0	0
Aliabad	Hunza	36.308563°	74.619496°	Bhindi	Abelmoschus esculentus (L.) Moench	Malvaceae	seed, fruit	1	Infusion	Shrub	0	0	1	0	0	0	0	0	0	0	0	0	0	0	0	0	0	0	0	0	0	0	0	0	0	0	0	0	0
Aliabad	Hunza	36.308563°	74.619496°	Bhindi	Abelmoschus esculentus (L.) Moench	Malvaceae	seed, fruit	1	Infusion	Shrub	0	0	1	0	0	0	0	0	0	0	0	0	0	0	0	0	0	0	0	0	0	0	0	0	0	0	0	0	0
Aliabad	Hunza	36.308563°	74.619496°	Bhindi	Abelmoschus esculentus (L.) Moench	Malvaceae	seed, fruit	1	Infusion	Shrub	0	0	1	0	0	0	0	0	0	0	0	0	0	0	0	0	0	0	0	0	0	0	0	0	0	0	0	0	0
Altit	Hunza	36.316102°	74.681835°	Bhindi	Abelmoschus esculentus (L.) Moench	Malvaceae	seed, fruit	1	Infusion	Shrub	0	0	1	0	0	0	0	0	0	0	0	0	0	0	0	0	0	0	0	0	0	0	0	0	0	0	0	0	0
Altit	Hunza	36.316102°	74.681835°	Bhindi	Abelmoschus esculentus (L.) Moench	Malvaceae	seed, fruit	1	Infusion	Shrub	0	0	1	0	0	0	0	0	0	0	0	0	0	0	0	0	0	0	0	0	0	0	0	0	0	0	0	0	0
Altit	Hunza	36.316102°	74.681835°	Bhindi	Abelmoschus esculentus (L.) Moench	Malvaceae	seed, fruit	1	Infusion	Shrub	0	0	1	0	0	0	0	0	0	0	0	0	0	0	0	0	0	0	0	0	0	0	0	0	0	0	0	0	0
Altit	Hunza	36.316102°	74.681835°	Bhindi	Abelmoschus esculentus (L.) Moench	Malvaceae	seed, fruit	1	Infusion	Shrub	0	0	1	0	0	0	0	0	0	0	0	0	0	0	0	0	0	0	0	0	0	0	0	0	0	0	0	0	0
Karimabad	Hunza	36.326408°	74.664316°	Bhindi	Abelmoschus esculentus (L.) Moench	Malvaceae	seed, fruit	1	Infusion	Shrub	0	0	1	0	0	0	0	0	0	0	0	0	0	0	0	0	0	0	0	0	0	0	0	0	0	0	0	0	0
Karimabad	Hunza	36.326408°	74.664316°	Bhindi	Abelmoschus esculentus (L.) Moench	Malvaceae	seed, fruit	1	Infusion	Shrub	0	0	1	0	0	0	0	0	0	0	0	0	0	0	0	0	0	0	0	0	0	0	0	0	0	0	0	0	0
Karimabad	Hunza	36.326408°	74.664316°	Bhindi	Abelmoschus esculentus (L.) Moench	Malvaceae	seed, fruit	1	Infusion	Shrub	0	0	1	0	0	0	0	0	0	0	0	0	0	0	0	0	0	0	0	0	0	0	0	0	0	0	0	0	0
Karimabad	Hunza	36.326408°	74.664316°	Bhindi	Abelmoschus esculentus (L.) Moench	Malvaceae	seed, fruit	1	Infusion	Shrub	0	0	1	0	0	0	0	0	0	0	0	0	0	0	0	0	0	0	0	0	0	0	0	0	0	0	0	0	0
Murtazaabad	Hunza	36.285517°	74.607833°	Bhindi	Abelmoschus esculentus (L.) Moench	Malvaceae	seed, fruit	1	Infusion	Shrub	0	0	1	0	0	0	0	0	0	0	0	0	0	0	0	0	0	0	0	0	0	0	0	0	0	0	0	0	0
Murtazaabad	Hunza	36.285517°	74.607833°	Bhindi	Abelmoschus esculentus (L.) Moench	Malvaceae	seed, fruit	1	Infusion	Shrub	0	0	1	0	0	0	0	0	0	0	0	0	0	0	0	0	0	0	0	0	0	0	0	0	0	0	0	0	0
Ghulmit	Nagar	36.241766°	74.462110°	Bhindi	Abelmoschus esculentus (L.) Moench	Malvaceae	seed, fruit	2	Infusion	Shrub	0	0	2	0	0	0	0	0	0	0	0	0	0	0	0	0	0	0	0	0	0	0	0	0	0	0	0	0	0
Ghulmit	Nagar	36.241766°	74.462110°	Bhindi	Abelmoschus esculentus (L.) Moench	Malvaceae	seed, fruit	2	Infusion	Shrub	0	0	2	0	0	0	0	0	0	0	0	0	0	0	0	0	0	0	0	0	0	0	0	0	0	0	0	0	0
Ghulmit	Nagar	36.241766°	74.462110°	Bhindi	Abelmoschus esculentus (L.) Moench	Malvaceae	seed, fruit	2	Infusion	Shrub	0	0	2	0	0	0	0	0	0	0	0	0	0	0	0	0	0	0	0	0	0	0	0	0	0	0	0	0	0
Ghulmit	Nagar	36.241766°	74.462110°	Bhindi	Abelmoschus esculentus (L.) Moench	Malvaceae	seed, fruit	2	Infusion	Shrub	0	0	2	0	0	0	0	0	0	0	0	0	0	0	0	0	0	0	0	0	0	0	0	0	0	0	0	0	0
Hopar	Nagar	36.225179°	74.754189°	Bhindi	Abelmoschus esculentus (L.) Moench	Malvaceae	seed, fruit	1	Infusion	Shrub	0	0	1	0	0	0	0	0	0	0	0	0	0	0	0	0	0	0	0	0	0	0	0	0	0	0	0	0	0
Minapin	Nagar	36.250922°	74.536075°	Bhindi	Abelmoschus esculentus (L.) Moench	Malvaceae	seed, fruit	2	Infusion	Shrub	0	0	2	0	0	0	0	0	0	0	0	0	0	0	0	0	0	0	0	0	0	0	0	0	0	0	0	0	0
Minapin	Nagar	36.250922°	74.536075°	Bhindi	Abelmoschus esculentus (L.) Moench	Malvaceae	seed, fruit	2	Infusion	Shrub	0	0	2	0	0	0	0	0	0	0	0	0	0	0	0	0	0	0	0	0	0	0	0	0	0	0	0	0	0
Minapin	Nagar	36.250922°	74.536075°	Bhindi	Abelmoschus esculentus (L.) Moench	Malvaceae	seed, fruit	1	Infusion	Shrub	0	0	1	0	0	0	0	0	0	0	0	0	0	0	0	0	0	0	0	0	0	0	0	0	0	0	0	0	0
Nagar Khas	Nagar	36.276377°	74.719955°	Bhindi	Abelmoschus esculentus (L.) Moench	Malvaceae	seed, fruit	2	Infusion	Shrub	0	0	2	0	0	0	0	0	0	0	0	0	0	0	0	0	0	0	0	0	0	0	0	0	0	0	0	0	0
Nagar Khas	Nagar	36.276377°	74.719955°	Bhindi	Abelmoschus esculentus (L.) Moench	Malvaceae	seed, fruit	2	Infusion	Shrub	0	0	2	0	0	0	0	0	0	0	0	0	0	0	0	0	0	0	0	0	0	0	0	0	0	0	0	0	0
Nagar Khas	Nagar	36.276377°	74.719955°	Bhindi	Abelmoschus esculentus (L.) Moench	Malvaceae	seed, fruit	2	Infusion	Shrub	0	0	2	0	0	0	0	0	0	0	0	0	0	0	0	0	0	0	0	0	0	0	0	0	0	0	0	0	0
Nagar Khas	Nagar	36.276377°	74.719955°	Bhindi	Abelmoschus esculentus (L.) Moench	Malvaceae	seed, fruit	2	Infusion	Shrub	0	0	2	0	0	0	0	0	0	0	0	0	0	0	0	0	0	0	0	0	0	0	0	0	0	0	0	0	0
Nagar Khas	Nagar	36.276377°	74.719955°	Bhindi	Abelmoschus esculentus (L.) Moench	Malvaceae	seed, fruit	2	Infusion	Shrub	0	0	2	0	0	0	0	0	0	0	0	0	0	0	0	0	0	0	0	0	0	0	0	0	0	0	0	0	0
Nagar Khas	Nagar	36.276377°	74.719955°	Bhindi	Abelmoschus esculentus (L.) Moench	Malvaceae	seed, fruit	2	Infusion	Shrub	0	0	2	0	0	0	0	0	0	0	0	0	0	0	0	0	0	0	0	0	0	0	0	0	0	0	0	0	0
Phekar	Nagar	36.263297°	74.594568°	Bhindi	Abelmoschus esculentus (L.) Moench	Malvaceae	seed, fruit	2	Infusion	Shrub	0	0	2	0	0	0	0	0	0	0	0	0	0	0	0	0	0	0	0	0	0	0	0	0	0	0	0	0	0
Phekar	Nagar	36.263297°	74.594568°	Bhindi	Abelmoschus esculentus (L.) Moench	Malvaceae	seed, fruit	2	Infusion	Shrub	0	0	2	0	0	0	0	0	0	0	0	0	0	0	0	0	0	0	0	0	0	0	0	0	0	0	0	0	0
Kargha	Gilgit	35.915251°	74.257648°	yarrow	Achillea millefolium L.	Compositae	flower	3	Decoction, poultice	Herb	1	0	0	0	0	0	0	0	0	0	0	0	0	0	1	0	0	0	0	0	0	0	0	1	0	0	0	0	0
Kargha	Gilgit	35.915251°	74.257648°	yarrow	Achillea millefolium L.	Compositae	flower	3	Decoction, poultice	Herb	1	0	0	0	0	0	0	0	0	0	0	0	0	0	1	0	0	0	0	0	0	0	0	1	0	0	0	0	0
Kargha	Gilgit	35.915251°	74.257648°	yarrow	Achillea millefolium L.	Compositae	flower	3	Decoction, poultice	Herb	1	0	0	0	0	0	0	0	0	0	0	0	0	0	1	0	0	0	0	0	0	0	0	1	0	0	0	0	0
Kargha	Gilgit	35.915251°	74.257648°	yarrow	Achillea millefolium L.	Compositae	flower	3	Decoction, poultice	Herb	1	0	0	0	0	0	0	0	0	0	0	0	0	0	1	0	0	0	0	0	0	0	0	1	0	0	0	0	0
Kargha	Gilgit	35.915251°	74.257648°	yarrow	Achillea millefolium L.	Compositae	flower	3	Decoction, poultice	Herb	1	0	0	0	0	0	0	0	0	0	0	0	0	0	1	0	0	0	0	0	0	0	0	1	0	0	0	0	0
Kargha	Gilgit	35.915251°	74.257648°	yarrow	Achillea millefolium L.	Compositae	flower	3	Decoction, poultice	Herb	1	0	0	0	0	0	0	0	0	0	0	0	0	0	1	0	0	0	0	0	0	0	0	1	0	0	0	0	0
Rahimabad	Gilgit	36.118837°	74.297376°	yarrow	Achillea millefolium L.	Compositae	flower	3	Decoction, poultice	Herb	1	0	0	0	0	0	0	0	0	0	0	0	0	0	1	0	0	0	0	0	0	0	0	1	0	0	0	0	0
Kargha	Gilgit	35.915251°	74.257648°	larghaky	Achyranthes aspera L.	Amaranthaceae	flower	1	Paste	Herb	0	0	0	0	0	0	0	0	0	0	0	0	0	0	0	0	0	0	0	0	0	0	0	0	0	0	0	1	0
Kargha	Gilgit	35.915251°	74.257648°	larghaky	Achyranthes aspera L.	Amaranthaceae	flower	3	Paste	Herb	0	0	0	0	0	0	0	1	0	0	0	0	0	0	0	0	1	0	0	0	0	0	0	0	0	0	0	1	0
Kargha	Gilgit	35.915251°	74.257648°	larghaky	Achyranthes aspera L.	Amaranthaceae	flower	3	Paste	Herb	0	0	0	0	0	0	0	1	0	0	0	0	0	0	0	0	1	0	0	0	0	0	0	0	0	0	0	1	0
Kargha	Gilgit	35.915251°	74.257648°	larghaky	Achyranthes aspera L.	Amaranthaceae	flower	2	Paste	Herb	0	0	0	0	0	0	0	0	0	0	0	0	0	0	0	0	1	0	0	0	0	0	0	0	0	0	0	1	0
Rahimabad	Gilgit	36.118837°	74.297376°	larghaky	Achyranthes aspera L.	Amaranthaceae	flower	3	Paste	Herb	0	0	0	0	0	0	0	1	0	0	0	0	0	0	0	0	1	0	0	0	0	0	0	0	0	0	0	1	0
Rahimabad	Gilgit	36.118837°	74.297376°	larghaky	Achyranthes aspera L.	Amaranthaceae	flower	3	Paste	Herb	0	0	0	0	0	0	0	1	0	0	0	0	0	0	0	0	1	0	0	0	0	0	0	0	0	0	0	1	0
Rahimabad	Gilgit	36.118837°	74.297376°	larghaky	Achyranthes aspera L.	Amaranthaceae	flower	2	Paste	Herb	0	0	0	0	0	0	0	1	0	0	0	0	0	0	0	0	0	0	0	0	0	0	0	0	0	0	0	1	0
Kargha	Gilgit	35.915251°	74.257648°	SaiBooma	Aconitum nepellus L.	Ranunculaceae	whole plant	3	Direct	Herb	0	0	1	1	1	0	0	0	0	0	0	0	0	0	0	0	0	0	0	0	0	0	0	0	0	0	0	0	0
Kargha	Gilgit	35.915251°	74.257648°	SaiBooma	Aconitum nepellus L.	Ranunculaceae	whole plant	2	Direct	Herb	0	0	1	0	1	0	0	0	0	0	0	0	0	0	0	0	0	0	0	0	0	0	0	0	0	0	0	0	0
Kargha	Gilgit	35.915251°	74.257648°	SaiBooma	Aconitum nepellus L.	Ranunculaceae	whole plant	3	Direct	Herb	0	0	1	1	1	0	0	0	0	0	0	0	0	0	0	0	0	0	0	0	0	0	0	0	0	0	0	0	0
Kargha	Gilgit	35.915251°	74.257648°	Booma	Aconitum nepellus L.	Ranunculaceae	flower, leaves	1	Direct	Herb	1	0	0	0	0	0	0	0	0	0	0	0	0	0	0	0	0	0	0	0	0	0	0	0	0	0	0	0	0
Kargha	Gilgit	35.915251°	74.257648°	Booma	Aconitum nepellus L.	Ranunculaceae	flower, leaves	1	Direct	Herb	1	0	0	0	0	0	0	0	0	0	0	0	0	0	0	0	0	0	0	0	0	0	0	0	0	0	0	0	0
Kargha	Gilgit	35.915251°	74.257648°	Booma	Aconitum nepellus L.	Ranunculaceae	flower, leaves	1	Direct	Herb	1	0	0	0	0	0	0	0	0	0	0	0	0	0	0	0	0	0	0	0	0	0	0	0	0	0	0	0	0
Kargha	Gilgit	35.915251°	74.257648°	Booma	Aconitum nepellus L.	Ranunculaceae	flower, leaves	1	Direct	Herb	1	0	0	0	0	0	0	0	0	0	0	0	0	0	0	0	0	0	0	0	0	0	0	0	0	0	0	0	0
Kargha	Gilgit	35.915251°	74.257648°	Booma	Aconitum nepellus L.	Ranunculaceae	flower, leaves	1	Direct	Herb	1	0	0	0	0	0	0	0	0	0	0	0	0	0	0	0	0	0	0	0	0	0	0	0	0	0	0	0	0
Rahimabad	Gilgit	36.118837°	74.297376°	SaiBooma	Aconitum nepellus L.	Ranunculaceae	whole plant	1	Direct	Herb	0	0	1	0	0	0	0	0	0	0	0	0	0	0	0	0	0	0	0	0	0	0	0	0	0	0	0	0	0
Rahimabad	Gilgit	36.118837°	74.297376°	SaiBooma	Aconitum nepellus L.	Ranunculaceae	whole plant	2	Direct	Herb	0	0	1	1	0	0	0	0	0	0	0	0	0	0	0	0	0	0	0	0	0	0	0	0	0	0	0	0	0
Rahimabad	Gilgit	36.118837°	74.297376°	Booma	Aconitum nepellus L.	Ranunculaceae	flower, leaves	1	Direct	Herb	1	0	0	0	0	0	0	0	0	0	0	0	0	0	0	0	0	0	0	0	0	0	0	0	0	0	0	0	0
Rahimabad	Gilgit	36.118837°	74.297376°	Booma	Aconitum nepellus L.	Ranunculaceae	flower, leaves	1	Direct	Herb	1	0	0	0	0	0	0	0	0	0	0	0	0	0	0	0	0	0	0	0	0	0	0	0	0	0	0	0	0
Ghulmit	Nagar	36.241766°	74.462110°	Booma	Aconitum nepellus L.	Ranunculaceae	flower, leaves	1	Direct	Herb	1	0	0	0	0	0	0	0	0	0	0	0	0	0	0	0	0	0	0	0	0	0	0	0	0	0	0	0	0
Minapin	Nagar	36.250922°	74.536075°	Booma	Aconitum nepellus L.	Ranunculaceae	flower, leaves	1	Direct	Herb	1	0	0	0	0	0	0	0	0	0	0	0	0	0	0	0	0	0	0	0	0	0	0	0	0	0	0	0	0
Nagar Khas	Nagar	36.276377°	74.719955°	Booma	Aconitum nepellus L.	Ranunculaceae	flower, leaves	1	Direct	Herb	1	0	0	0	0	0	0	0	0	0	0	0	0	0	0	0	0	0	0	0	0	0	0	0	0	0	0	0	0
Phekar	Nagar	36.263297°	74.594568°	Booma	Aconitum nepellus L.	Ranunculaceae	flower, leaves	1	Direct	Herb	1	0	0	0	0	0	0	0	0	0	0	0	0	0	0	0	0	0	0	0	0	0	0	0	0	0	0	0	0
Basho	Skardu	35.469494°	75.359156°	Booma	Aconitum nepellus L.	Rananculaceae	Aerial	1	Direct	Herb	1	0	0	0	0	0	0	0	0	0	0	0	0	0	0	0	0	0	0	0	0	0	0	0	0	0	0	0	0
Hashupi	Skardu	35.485929°	75.696578°	Booma	Aconitum nepellus L.	Rananculaceae	Aerial	1	Direct	Herb	1	0	0	0	0	0	0	0	0	0	0	0	0	0	0	0	0	0	0	0	0	0	0	0	0	0	0	0	0
Hashupi	Skardu	35.485929°	75.696578°	Booma	Aconitum nepellus L.	Rananculaceae	Aerial	2	Direct	Herb	1	1	0	0	0	0	0	0	0	0	0	0	0	0	0	0	0	0	0	0	0	0	0	0	0	0	0	0	0
Hosho	Skardu	35.345214°	75.515283°	Booma	Aconitum nepellus L.	Rananculaceae	Aerial	2	Direct	Herb	1	1	0	0	0	0	0	0	0	0	0	0	0	0	0	0	0	0	0	0	0	0	0	0	0	0	0	0	0
Thowar	Skardu	35.609167°	75.203611°	Booma	Aconitum nepellus L.	Rananculaceae	Aerial	2	Direct	Herb	1	1	0	0	0	0	0	0	0	0	0	0	0	0	0	0	0	0	0	0	0	0	0	0	0	0	0	0	0
Thowar	Skardu	35.609167°	75.203611°	Booma	Aconitum nepellus L.	Rananculaceae	Aerial	1	Direct	Herb	0	1	0	0	0	0	0	0	0	0	0	0	0	0	0	0	0	0	0	0	0	0	0	0	0	0	0	0	0
Basho	Skardu	35.469494°	75.359156°	Booma	Aconitum violaceum Jacquem. Ex. Stapf	Ranunculaceae	root	2	Decoction, powder/grinded	Herb	0	0	0	0	0	0	0	0	1	0	0	0	0	0	0	0	0	0	1	0	0	0	0	0	0	0	0	0	0
Basho	Skardu	35.469494°	75.359156°	Booma	Aconitum violaceum Jacquem. Ex. Stapf	Ranunculaceae	root	2	Decoction, powder/grinded	Herb	0	0	0	0	0	0	0	0	0	0	0	0	0	0	0	0	1	0	1	0	0	0	0	0	0	0	0	0	0
Basho	Skardu	35.469494°	75.359156°	Booma	Aconitum violaceum Jacquem. Ex. Stapf	Ranunculaceae	root	3	Decoction, powder/grinded	Herb	0	0	0	0	0	0	0	0	1	0	1	0	0	0	0	0	1	0	0	0	0	0	0	0	0	0	0	0	0
Hashupi	Skardu	35.485929°	75.696578°	Booma	Aconitum violaceum Jacquem. Ex. Stapf	Ranunculaceae	root	2	Decoction, powder/grinded	Herb	0	0	0	0	0	0	0	0	0	0	1	0	0	0	0	0	0	0	1	0	0	0	0	0	0	0	0	0	0
Hashupi	Skardu	35.485929°	75.696578°	Booma	Aconitum violaceum Jacquem. Ex. Stapf	Ranunculaceae	root	3	Decoction, powder/grinded	Herb	0	0	0	0	0	0	0	0	1	0	0	0	0	0	0	0	1	0	1	0	0	0	0	0	0	0	0	0	0
Hashupi	Skardu	35.485929°	75.696578°	Booma	Aconitum violaceum Jacquem. Ex. Stapf	Ranunculaceae	root	1	Decoction	Herb	0	0	0	0	0	0	0	0	0	0	1	0	0	0	0	0	0	0	0	0	0	0	0	0	0	0	0	0	0
Hashupi	Skardu	35.485929°	75.696578°	Booma	Aconitum violaceum Jacquem. Ex. Stapf	Ranunculaceae	root	3	Decoction, powder/grinded	Herb	0	0	0	0	0	0	0	0	1	0	1	0	0	0	0	0	1	0	0	0	0	0	0	0	0	0	0	0	0
Ghulkin	Hunza	36.407318°	74.863984°	Shutpask	Aerva lanata (L.) Juss.	Amaranthaceae	whole plant	1	Ash, decoction	Herb	0	0	0	0	0	1	0	0	0	0	0	0	0	0	0	0	0	0	0	0	0	0	0	0	0	0	0	0	0
Ghulkin	Hunza	36.407318°	74.863984°	Shutpask	Aerva lanata (L.) Juss.	Amaranthaceae	whole plant	2	Ash, decoction	Herb	1	0	0	0	0	1	0	0	0	0	0	0	0	0	0	0	0	0	0	0	0	0	0	0	0	0	0	0	0
Ghulkin	Hunza	36.407318°	74.863984°	Shutpask	Aerva lanata (L.) Juss.	Amaranthaceae	whole plant	2	Ash, decoction	Herb	0	0	0	0	0	1	0	0	1	0	0	0	0	0	0	0	0	0	0	0	0	0	0	0	0	0	0	0	0
Ghulkin	Hunza	36.407318°	74.863984°	Shutpask	Aerva lanata (L.) Juss.	Amaranthaceae	whole plant	2	Ash, decoction	Herb	1	0	0	0	0	1	0	0	0	0	0	0	0	0	0	0	0	0	0	0	0	0	0	0	0	0	0	0	0
Ghulkin	Hunza	36.407318°	74.863984°	Shutpask	Aerva lanata (L.) Juss.	Amaranthaceae	whole plant	2	Ash, decoction	Herb	1	0	0	0	0	1	0	0	0	0	0	0	0	0	0	0	0	0	0	0	0	0	0	0	0	0	0	0	0
Shimshal	Hunza	36.436464°	75.313109°	Shutpask	Aerva lanata (L.) Juss.	Amaranthaceae	whole plant	3	Ash, decoction	Herb	1	0	0	0	0	1	0	0	1	0	0	0	0	0	0	0	0	0	0	0	0	0	0	0	0	0	0	0	0
Shimshal	Hunza	36.436464°	75.313109°	Shutpask	Aerva lanata (L.) Juss.	Amaranthaceae	whole plant	2	Ash, decoction	Herb	1	0	0	0	0	1	0	0	0	0	0	0	0	0	0	0	0	0	0	0	0	0	0	0	0	0	0	0	0
Basho	Skardu	35.469494°	75.359156°	Tarkham	Allardia tomentosa Decne.	Asteraceae	leaves, flower	3	Powder/grinded	Herb	1	0	0	0	0	0	0	1	1	0	0	0	0	0	0	0	0	0	0	0	0	0	0	0	0	0	0	0	0
Hashupi	Skardu	35.485929°	75.696578°	Tarkham	Allardia tomentosa Decne.	Asteraceae	leaves, flower	3	Powder/grinded	Herb	1	0	0	0	0	0	0	1	1	0	0	0	0	0	0	0	0	0	0	0	0	0	0	0	0	0	0	0	0
Hashupi	Skardu	35.485929°	75.696578°	Tarkham	Allardia tomentosa Decne.	Asteraceae	leaves, flower	2	Powder/grinded	Herb	0	0	0	0	0	0	0	2	0	0	0	0	0	0	0	0	0	0	0	0	0	0	0	0	0	0	0	0	0
Hosho	Skardu	35.345214°	75.515283°	Tarkham	Allardia tomentosa Decne.	Asteraceae	leaves, flower	2	Powder/grinded	Herb	0	0	0	0	0	0	0	2	0	0	0	0	0	0	0	0	0	0	0	0	0	0	0	0	0	0	0	0	0
Thowar	Skardu	35.609167°	75.203611°	Tarkham	Allardia tomentosa Decne.	Asteraceae	leaves, flower	2	Powder/grinded	Herb	0	0	0	0	0	0	0	1	1	0	0	0	0	0	0	0	0	0	0	0	0	0	0	0	0	0	0	0	0
Thowar	Skardu	35.609167°	75.203611°	Tarkham	Allardia tomentosa Decne.	Asteraceae	leaves, flower	1	Powder/grinded	Herb	0	0	0	0	0	0	0	1	0	0	0	0	0	0	0	0	0	0	0	0	0	0	0	0	0	0	0	0	0
Eidgah	Astore	35.347049°	74.857882°	Chong	Allium carolinianum DC.	Amaryllidaceae	Bulb	6	Direct, decoction	Herb	1	0	1	0	0	0	0	1	1	0	0	0	0	0	0	0	2	0	0	0	0	0	0	0	0	0	0	0	0
Gorikot	Astore	35.281969°	74.841940°	Chong	Allium carolinianum DC.	Amaryllidaceae	Bulb	3	Direct, paste	Herb	1	0	1	0	0	0	0	1	0	0	0	0	0	0	0	0	0	0	0	0	0	0	0	0	0	0	0	0	0
Gorikot	Astore	35.281969°	74.841940°	Chong	Allium carolinianum DC.	Amaryllidaceae	Bulb	3	Direct, decoction	Herb	1	0	1	0	0	0	0	1	0	0	0	0	0	0	0	0	0	0	0	0	0	0	0	0	0	0	0	0	0
Gorikot	Astore	35.281969°	74.841940°	Chong	Allium carolinianum DC.	Amaryllidaceae	Bulb	3	Direct, paste	Herb	1	0	1	0	0	0	0	1	0	0	0	0	0	0	0	0	0	0	0	0	0	0	0	0	0	0	0	0	0
Jaglot	Astore	35.685000°	74.623889°	Chong	Allium carolinianum DC.	Amaryllidaceae	Bulb	3	Direct, decoction	Herb	1	0	1	0	0	0	0	1	0	0	0	0	0	0	0	0	0	0	0	0	0	0	0	0	0	0	0	0	0
Rattu	Astore	35.168461°	74.791752°1	Chong	Allium carolinianum DC.	Amaryllidaceae	Bulb	5	Direct, decoction	Herb	1	0	1	0	0	0	0	1	1	0	0	0	0	0	0	0	1	0	0	0	0	0	0	0	0	0	0	0	0
Kargha	Gilgit	35.915251°	74.257648°	Chong	Allium carolinianum DC.	Amaryllidaceae	Bulb	3	Direct, decoction	Herb	1	0	1	0	0	0	0	1	0	0	0	0	0	0	0	0	0	0	0	0	0	0	0	0	0	0	0	0	0
Kargha	Gilgit	35.915251°	74.257648°	Chong	Allium carolinianum DC.	Amaryllidaceae	Bulb	4	Direct, decoction	Herb	1	0	1	0	0	0	0	1	0	0	0	0	0	0	0	0	1	0	0	0	0	0	0	0	0	0	0	0	0
Kargha	Gilgit	35.915251°	74.257648°	Chong	Allium carolinianum DC.	Amaryllidaceae	Bulb	3	Direct, decoction	Herb	1	0	1	0	0	0	0	1	0	0	0	0	0	0	0	0	0	0	0	0	0	0	0	0	0	0	0	0	0
Kargha	Gilgit	35.915251°	74.257648°	Chong	Allium carolinianum DC.	Amaryllidaceae	Bulb	3	Direct, decoction	Herb	1	0	1	0	0	0	0	1	0	0	0	0	0	0	0	0	0	0	0	0	0	0	0	0	0	0	0	0	0
Kargha	Gilgit	35.915251°	74.257648°	Chong	Allium carolinianum DC.	Amaryllidaceae	Bulb	3	Direct, decoction	Herb	1	0	1	0	0	0	0	1	0	0	0	0	0	0	0	0	0	0	0	0	0	0	0	0	0	0	0	0	0
Rahimabad	Gilgit	36.118837°	74.297376°	Chong	Allium carolinianum DC.	Amaryllidaceae	Bulb	4	Direct, decoction	Herb	1	0	1	0	0	0	0	1	0	0	0	0	0	0	0	0	1	0	0	0	0	0	0	0	0	0	0	0	0
Rahimabad	Gilgit	36.118837°	74.297376°	Chong	Allium carolinianum DC.	Amaryllidaceae	Bulb	3	Direct, decoction	Herb	1	0	1	0	0	0	0	1	0	0	0	0	0	0	0	0	0	0	0	0	0	0	0	0	0	0	0	0	0
Ghulkin	Hunza	36.407318°	74.863984°	Kachpauk	Allium carolinianum DC.	Amaryllidaceae	leaves, bulb	4	Direct, paste	Herb	0	0	0	0	0	0	0	1	1	0	0	0	0	0	0	0	2	0	0	0	0	0	0	0	0	0	0	0	0
Ghulkin	Hunza	36.407318°	74.863984°	Kachpauk	Allium carolinianum DC.	Amaryllidaceae	leaves, bulb	4	Direct, decoction	Herb	0	0	0	0	0	0	0	1	1	0	0	0	0	0	0	0	2	0	0	0	0	0	0	0	0	0	0	0	0
Ghulkin	Hunza	36.407318°	74.863984°	Kachpauk	Allium carolinianum DC.	Amaryllidaceae	leaves, bulb	4	Direct, decoction	Herb	0	0	0	0	0	0	0	1	1	0	0	0	0	0	0	0	2	0	0	0	0	0	0	0	0	0	0	0	0
Ghulkin	Hunza	36.407318°	74.863984°	Kachpauk	Allium carolinianum DC.	Amaryllidaceae	leaves, bulb	4	Direct, decoction	Herb	0	0	0	0	0	0	0	1	1	0	0	0	0	0	0	0	2	0	0	0	0	0	0	0	0	0	0	0	0
Ghulkin	Hunza	36.407318°	74.863984°	Kachpauk	Allium carolinianum DC.	Amaryllidaceae	leaves, bulb	3	Direct, decoction	Herb	0	0	0	0	0	0	0	0	1	0	0	0	0	0	0	0	2	0	0	0	0	0	0	0	0	0	0	0	0
Shimshal	Hunza	36.436464°	75.313109°	Kachpauk	Allium carolinianum DC.	Amaryllidaceae	leaves, bulb	3	Direct, decoction	Herb	0	0	0	0	0	0	0	0	1	0	0	0	0	0	0	0	2	0	0	0	0	0	0	0	0	0	0	0	0
Shimshal	Hunza	36.436464°	75.313109°	Kachpauk	Allium carolinianum DC.	Amaryllidaceae	leaves, bulb	3	Direct, paste	Herb	0	0	0	0	0	0	0	0	1	0	0	0	0	0	0	0	2	0	0	0	0	0	0	0	0	0	0	0	0
Ghulmit	Nagar	36.241766°	74.462110°	Booma	Allium carolinianum DC.	Amaryllidaceae	Bulb	3	Direct, decoction	Herb	1	0	1	0	0	0	0	1	0	0	0	0	0	0	0	0	0	0	0	0	0	0	0	0	0	0	0	0	0
Nagar Khas	Nagar	36.276377°	74.719955°	Booma	Allium carolinianum DC.	Amaryllidaceae	Bulb	3	Direct, decoction	Herb	1	0	1	0	0	0	0	1	0	0	0	0	0	0	0	0	0	0	0	0	0	0	0	0	0	0	0	0	0
Phekar	Nagar	36.263297°	74.594568°	Booma	Allium carolinianum DC.	Amaryllidaceae	Bulb	4	Direct, decoction	Herb	1	0	1	0	0	0	0	1	0	0	0	0	0	0	0	0	1	0	0	0	0	0	0	0	0	0	0	0	0
Basho	Skardu	35.469494°	75.359156°	Chong	Allium carolinianum DC.	Amaryllidaceae	Bulb	2	Direct, decoction, paste	Herb	0	0	0	0	0	0	0	1	1	0	0	0	0	0	0	0	0	0	0	0	0	0	0	0	0	0	0	0	0
Basho	Skardu	35.469494°	75.359156°	Chong	Allium carolinianum DC.	Amaryllidaceae	Bulb	3	Direct, paste	Herb	1	0	1	0	0	0	0	1	0	0	0	0	0	0	0	0	0	0	0	0	0	0	0	0	0	0	0	0	0
Basho	Skardu	35.469494°	75.359156°	Chong	Allium carolinianum DC.	Amaryllidaceae	Bulb	3	Direct, decoction, paste	Herb	1	0	1	0	0	0	0	0	1	0	0	0	0	0	0	0	0	0	0	0	0	0	0	0	0	0	0	0	0
Hashupi	Skardu	35.485929°	75.696578°	Chong	Allium carolinianum DC.	Amaryllidaceae	Bulb	4	Direct, decoction, paste	Herb	1	0	1	0	0	0	0	1	1	0	0	0	0	0	0	0	0	0	0	0	0	0	0	0	0	0	0	0	0
Hashupi	Skardu	35.485929°	75.696578°	Chong	Allium carolinianum DC.	Amaryllidaceae	Bulb	3	Direct, decoction, paste	Herb	1	0	1	0	0	0	0	1	0	0	0	0	0	0	0	0	0	0	0	0	0	0	0	0	0	0	0	0	0
Hashupi	Skardu	35.485929°	75.696578°	Chong	Allium carolinianum DC.	Amaryllidaceae	Bulb	2	Direct, paste	Herb	0	0	1	0	0	0	0	0	1	0	0	0	0	0	0	0	0	0	0	0	0	0	0	0	0	0	0	0	0
Hashupi	Skardu	35.485929°	75.696578°	Chong	Allium carolinianum DC.	Amaryllidaceae	Bulb	4	Direct, decoction, paste	Herb	1	0	0	0	0	0	0	1	1	0	0	0	0	0	0	0	1	0	0	0	0	0	0	0	0	0	0	0	0
Kargha	Gilgit	35.915251°	74.257648°	Xong	Allium cepa L.	Amaryllidaceae	bulb	2	Poultice, decoction, direct	Herb	1	0	0	0	0	0	0	0	0	0	0	0	0	0	0	0	0	0	0	0	0	0	0	0	0	1	0	0	0
Kargha	Gilgit	35.915251°	74.257648°	Xong	Allium cepa L.	Amaryllidaceae	bulb	2	Poultice, decoction, direct	Herb	1	0	0	0	0	0	0	0	0	0	0	0	0	0	0	0	0	0	0	0	0	0	0	0	0	1	0	0	0
Kargha	Gilgit	35.915251°	74.257648°	Xong	Allium cepa L.	Amaryllidaceae	bulb	1	Decoction	Herb	0	0	0	0	0	0	0	0	0	0	0	0	0	0	0	0	0	0	0	0	0	0	0	0	0	1	0	0	0
Kargha	Gilgit	35.915251°	74.257648°	Xong	Allium cepa L.	Amaryllidaceae	bulb	2	Poultice, decoction, direct	Herb	1	0	0	0	0	0	0	0	0	0	0	0	0	0	0	0	0	0	0	0	0	0	0	0	0	1	0	0	0
Rahimabad	Gilgit	36.118837°	74.297376°	Xong	Allium cepa L.	Amaryllidaceae	bulb	3	Poultice, decoction, direct	Herb	1	1	0	0	0	0	0	0	0	0	0	0	0	0	0	0	0	0	0	0	0	0	0	0	0	1	0	0	0
Rahimabad	Gilgit	36.118837°	74.297376°	Xong	Allium cepa L.	Amaryllidaceae	bulb	2	Poultice, decoction, direct	Herb	0	1	0	0	0	0	0	0	0	0	0	0	0	0	0	0	0	0	0	0	0	0	0	0	0	1	0	0	0
Rahimabad	Gilgit	36.118837°	74.297376°	Xong	Allium cepa L.	Amaryllidaceae	bulb	2	Poultice, decoction	Herb	1	0	0	0	0	0	0	0	0	0	0	0	0	0	0	0	0	0	0	0	0	0	0	0	0	1	0	0	0
Aliabad	Hunza	36.308563°	74.619496°	Ghashoo	Allium cepa L.	Amaryllidaceae	poultice, bulbet	1	Poultice, paste	Herb	0	1	0	0	0	0	0	0	0	0	0	0	0	0	0	0	0	0	0	0	0	0	0	0	0	0	0	0	0
Aliabad	Hunza	36.308563°	74.619496°	Ghashoo	Allium cepa L.	Amaryllidaceae	poultice, bulbet	1	Poultice, paste	Herb	1	0	0	0	0	0	0	0	0	0	0	0	0	0	0	0	0	0	0	0	0	0	0	0	0	0	0	0	0
Aliabad	Hunza	36.308563°	74.619496°	Ghashoo	Allium cepa L.	Amaryllidaceae	poultice, bulbet	1	Poultice, paste	Herb	0	1	0	0	0	0	0	0	0	0	0	0	0	0	0	0	0	0	0	0	0	0	0	0	0	0	0	0	0
Aliabad	Hunza	36.308563°	74.619496°	Ghashoo	Allium cepa L.	Amaryllidaceae	poultice, bulbet	1	Poultice, paste	Herb	1	0	0	0	0	0	0	0	0	0	0	0	0	0	0	0	0	0	0	0	0	0	0	0	0	0	0	0	0
Aliabad	Hunza	36.308563°	74.619496°	Ghashoo	Allium cepa L.	Amaryllidaceae	poultice, bulbet	1	Poultice, paste	Herb	1	0	0	0	0	0	0	0	0	0	0	0	0	0	0	0	0	0	0	0	0	0	0	0	0	0	0	0	0
Aliabad	Hunza	36.308563°	74.619496°	Ghashoo	Allium cepa L.	Amaryllidaceae	poultice, bulbet	1	Poultice, paste	Herb	0	1	0	0	0	0	0	0	0	0	0	0	0	0	0	0	0	0	0	0	0	0	0	0	0	0	0	0	0
Aliabad	Hunza	36.308563°	74.619496°	Ghashoo	Allium cepa L.	Amaryllidaceae	poultice, bulbet	1	Poultice, paste	Herb	1	0	0	0	0	0	0	0	0	0	0	0	0	0	0	0	0	0	0	0	0	0	0	0	0	0	0	0	0
Altit	Hunza	36.316102°	74.681835°	Ghashoo	Allium cepa L.	Amaryllidaceae	poultice, bulbet	1	Decoction	Herb	1	0	0	0	0	0	0	0	0	0	0	0	0	0	0	0	0	0	0	0	0	0	0	0	0	0	0	0	0
Altit	Hunza	36.316102°	74.681835°	Ghashoo	Allium cepa L.	Amaryllidaceae	poultice, bulbet	1	Decoction	Herb	1	0	0	0	0	0	0	0	0	0	0	0	0	0	0	0	0	0	0	0	0	0	0	0	0	0	0	0	0
Altit	Hunza	36.316102°	74.681835°	Ghashoo	Allium cepa L.	Amaryllidaceae	poultice, bulbet	2	Poultice, paste	Herb	1	1	0	0	0	0	0	0	0	0	0	0	0	0	0	0	0	0	0	0	0	0	0	0	0	0	0	0	0
Karimabad	Hunza	36.326408°	74.664316°	Ghashoo	Allium cepa L.	Amaryllidaceae	poultice, bulbet	1	Decoction	Herb	1	0	0	0	0	0	0	0	0	0	0	0	0	0	0	0	0	0	0	0	0	0	0	0	0	0	0	0	0
Karimabad	Hunza	36.326408°	74.664316°	Ghashoo	Allium cepa L.	Amaryllidaceae	poultice, bulbet	2	Poultice, paste	Herb	1	1	0	0	0	0	0	0	0	0	0	0	0	0	0	0	0	0	0	0	0	0	0	0	0	0	0	0	0
Murtazaabad	Hunza	36.285517°	74.607833°	Ghashoo	Allium cepa L.	Amaryllidaceae	poultice, bulbet	2	Decoction	Herb	1	1	0	0	0	0	0	0	0	0	0	0	0	0	0	0	0	0	0	0	0	0	0	0	0	0	0	0	0
Murtazaabad	Hunza	36.285517°	74.607833°	Ghashoo	Allium cepa L.	Amaryllidaceae	poultice, bulbet	2	Decoction	Herb	1	1	0	0	0	0	0	0	0	0	0	0	0	0	0	0	0	0	0	0	0	0	0	0	0	0	0	0	0
Murtazaabad	Hunza	36.285517°	74.607833°	Ghashoo	Allium cepa L.	Amaryllidaceae	poultice, bulbet	1	Decoction	Herb	0	1	0	0	0	0	0	0	0	0	0	0	0	0	0	0	0	0	0	0	0	0	0	0	0	0	0	0	0
Murtazaabad	Hunza	36.285517°	74.607833°	Ghashoo	Allium cepa L.	Amaryllidaceae	poultice, bulbet	1	Poultice, paste	Herb	1	0	0	0	0	0	0	0	0	0	0	0	0	0	0	0	0	0	0	0	0	0	0	0	0	0	0	0	0
Ghulmit	Nagar	36.241766°	74.462110°	Xong	Allium cepa L.	Amaryllidaceae	bulb	2	Poultice, decoction	Herb	1	0	0	0	0	0	0	0	0	0	0	0	0	0	0	0	0	0	0	0	0	0	0	0	0	1	0	0	0
Minapin	Nagar	36.250922°	74.536075°	Xong	Allium cepa L.	Amaryllidaceae	bulb	3	Poultice, decoction	Herb	1	1	0	0	0	0	0	0	0	0	0	0	0	0	0	0	0	0	0	0	0	0	0	0	0	1	0	0	0
Nagar Khas	Nagar	36.276377°	74.719955°	Xong	Allium cepa L.	Amaryllidaceae	bulb	2	Poultice, decoction	Herb	1	0	0	0	0	0	0	0	0	0	0	0	0	0	0	0	0	0	0	0	0	0	0	0	0	1	0	0	0
Phekar	Nagar	36.263297°	74.594568°	Xong	Allium cepa L.	Amaryllidaceae	bulb	2	Poultice, decoction	Herb	0	1	0	0	0	0	0	0	0	0	0	0	0	0	0	0	0	0	0	0	0	0	0	0	0	1	0	0	0
Basho	Skardu	35.469494°	75.359156°	Song	Allium cepa L.	Amaryllidaceae	bulb, leaves	1	Decoction	Herb	0	1	0	0	0	0	0	0	0	0	0	0	0	0	0	0	0	0	0	0	0	0	0	0	0	0	0	0	0
Hashupi	Skardu	35.485929°	75.696578°	Song	Allium cepa L.	Amaryllidaceae	bulb, leaves	1	Decoction	Herb	0	1	0	0	0	0	0	0	0	0	0	0	0	0	0	0	0	0	0	0	0	0	0	0	0	0	0	0	0
Hashupi	Skardu	35.485929°	75.696578°	Song	Allium cepa L.	Amaryllidaceae	bulb, leaves	1	Decoction	Herb	0	1	0	0	0	0	0	0	0	0	0	0	0	0	0	0	0	0	0	0	0	0	0	0	0	0	0	0	0
Hosho	Skardu	35.345214°	75.515283°	Song	Allium cepa L.	Amaryllidaceae	bulb, leaves	1	Direct	Herb	0	1	0	0	0	0	0	0	0	0	0	0	0	0	0	0	0	0	0	0	0	0	0	0	0	0	0	0	0
Thowar	Skardu	35.609167°	75.203611°	Song	Allium cepa L.	Amaryllidaceae	bulb, leaves	1	Decoction	Herb	0	1	0	0	0	0	0	0	0	0	0	0	0	0	0	0	0	0	0	0	0	0	0	0	0	0	0	0	0
Thowar	Skardu	35.609167°	75.203611°	Song	Allium cepa L.	Amaryllidaceae	bulb, leaves	1	Direct	Herb	0	1	0	0	0	0	0	0	0	0	0	0	0	0	0	0	0	0	0	0	0	0	0	0	0	0	0	0	0
Basho	Skardu	35.469494°	75.359156°	Chung	Allium humile Kunth	Amaryllidaceae	Bulb infusion	2	Infusion, direct	Herb	0	0	0	0	0	0	0	0	1	0	0	0	0	0	0	0	1	0	0	0	0	0	0	0	0	0	0	0	0
Basho	Skardu	35.469494°	75.359156°	Chung	Allium humile Kunth	Amaryllidaceae	Bulb infusion	3	Infusion, direct	Herb	0	0	0	0	0	0	0	1	1	0	0	0	0	0	0	0	1	0	0	0	0	0	0	0	0	0	0	0	0
Basho	Skardu	35.469494°	75.359156°	Chung	Allium humile Kunth	Amaryllidaceae	Bulb infusion	2	Infusion, direct	Herb	0	0	0	0	0	0	0	0	1	0	0	0	0	0	0	0	1	0	0	0	0	0	0	0	0	0	0	0	0
Hashupi	Skardu	35.485929°	75.696578°	Chung	Allium humile Kunth	Amaryllidaceae	Bulb infusion	3	Infusion, direct	Herb	0	0	0	0	0	0	0	1	2	0	0	0	0	0	0	0	0	0	0	0	0	0	0	0	0	0	0	0	0
Hashupi	Skardu	35.485929°	75.696578°	Chung	Allium humile Kunth	Amaryllidaceae	Bulb infusion	2	Infusion, direct	Herb	0	0	0	0	0	0	0	0	1	0	0	0	0	0	0	0	1	0	0	0	0	0	0	0	0	0	0	0	0
Hashupi	Skardu	35.485929°	75.696578°	Chung	Allium humile Kunth	Amaryllidaceae	Bulb infusion	3	Infusion, direct	Herb	0	0	0	0	0	0	0	0	2	0	0	0	0	0	0	0	1	0	0	0	0	0	0	0	0	0	0	0	0
Hashupi	Skardu	35.485929°	75.696578°	Chung	Allium humile Kunth	Amaryllidaceae	Bulb infusion	2	Infusion, direct	Herb	0	0	0	0	0	0	0	1	1	0	0	0	0	0	0	0	0	0	0	0	0	0	0	0	0	0	0	0	0
Kargha	Gilgit	35.915251°	74.257648°	Zgoqpa	Allium sativum L.	Amaryllidaceae	bulb	1	Direct	Herb	0	0	0	0	0	0	0	0	0	0	0	0	0	0	0	0	0	0	0	0	0	0	0	0	0	1	0	0	0
Kargha	Gilgit	35.915251°	74.257648°	Zgoqpa	Allium sativum L.	Amaryllidaceae	bulb	1	Direct	Herb	0	0	0	0	0	0	0	0	0	0	0	0	0	0	0	0	0	0	0	0	0	0	0	0	0	1	0	0	0
Kargha	Gilgit	35.915251°	74.257648°	Zgoqpa	Allium sativum L.	Amaryllidaceae	bulb	1	Direct	Herb	0	0	0	0	0	0	0	0	0	0	0	0	0	0	0	0	0	0	0	0	0	0	0	0	0	1	0	0	0
Kargha	Gilgit	35.915251°	74.257648°	Zgoqpa	Allium sativum L.	Amaryllidaceae	bulb	1	Direct	Herb	0	0	0	0	0	0	0	0	0	0	0	0	0	0	0	0	0	0	0	0	0	0	0	0	0	1	0	0	0
Rahimabad	Gilgit	36.118837°	74.297376°	Zgoqpa	Allium sativum L.	Amaryllidaceae	bulb	1	Direct	Herb	0	0	0	0	0	0	0	0	0	0	0	0	0	0	0	0	0	0	0	0	0	0	0	0	0	1	0	0	0
Rahimabad	Gilgit	36.118837°	74.297376°	Zgoqpa	Allium sativum L.	Amaryllidaceae	bulb	1	Direct	Herb	0	0	0	0	0	0	0	0	0	0	0	0	0	0	0	0	0	0	0	0	0	0	0	0	0	1	0	0	0
Rahimabad	Gilgit	36.118837°	74.297376°	Zgoqpa	Allium sativum L.	Amaryllidaceae	bulb	1	Direct	Herb	0	0	0	0	0	0	0	0	0	0	0	0	0	0	0	0	0	0	0	0	0	0	0	0	0	1	0	0	0
Aliabad	Hunza	36.308563°	74.619496°	Bukpa	Allium sativum L.	Amaryllidaceae	bulb	1	Direct	Herb	0	0	0	0	0	0	0	0	1	0	0	0	0	0	0	0	0	0	0	0	0	0	0	0	0	0	0	0	0
Aliabad	Hunza	36.308563°	74.619496°	Bukpa	Allium sativum L.	Amaryllidaceae	bulb	2	Direct	Herb	0	0	0	0	0	0	0	0	1	0	0	0	0	0	1	0	0	0	0	0	0	0	0	0	0	0	0	0	0
Aliabad	Hunza	36.308563°	74.619496°	Bukpa	Allium sativum L.	Amaryllidaceae	bulb	3	Direct	Herb	0	0	0	0	0	0	0	0	1	0	0	0	0	0	1	0	0	0	0	1	0	0	0	0	0	0	0	0	0
Aliabad	Hunza	36.308563°	74.619496°	Bukpa	Allium sativum L.	Amaryllidaceae	bulb	3	Direct	Herb	0	0	0	0	0	0	0	1	0	0	0	0	0	0	1	0	0	0	0	1	0	0	0	0	0	0	0	0	0
Aliabad	Hunza	36.308563°	74.619496°	Bukpa	Allium sativum L.	Amaryllidaceae	bulb	1	Direct	Herb	0	0	0	0	0	0	0	0	0	0	0	0	0	0	1	0	0	0	0	0	0	0	0	0	0	0	0	0	0
Aliabad	Hunza	36.308563°	74.619496°	Bukpa	Allium sativum L.	Amaryllidaceae	bulb	1	Direct	Herb	0	0	0	0	0	0	0	0	0	0	0	0	0	0	0	0	0	0	0	1	0	0	0	0	0	0	0	0	0
Aliabad	Hunza	36.308563°	74.619496°	Bukpa	Allium sativum L.	Amaryllidaceae	bulb	2	Direct	Herb	0	0	0	0	0	0	0	1	0	0	0	0	0	0	0	0	0	0	0	1	0	0	0	0	0	0	0	0	0
Altit	Hunza	36.316102°	74.681835°	Bukpa	Allium sativum L.	Amaryllidaceae	bulb	3	Direct	Herb	0	0	0	0	0	0	0	1	0	0	0	0	0	0	1	0	0	0	0	1	0	0	0	0	0	0	0	0	0
Altit	Hunza	36.316102°	74.681835°	Bukpa	Allium sativum L.	Amaryllidaceae	bulb	4	Direct	Herb	0	0	0	0	0	0	0	1	1	0	0	0	0	0	1	0	0	0	0	1	0	0	0	0	0	0	0	0	0
Altit	Hunza	36.316102°	74.681835°	Bukpa	Allium sativum L.	Amaryllidaceae	bulb	3	Direct	Herb	0	0	0	0	0	0	0	0	1	0	0	0	0	0	1	0	0	0	0	1	0	0	0	0	0	0	0	0	0
Altit	Hunza	36.316102°	74.681835°	Bukpa	Allium sativum L.	Amaryllidaceae	bulb	3	Direct	Herb	0	0	0	0	0	0	0	0	1	0	0	0	0	0	1	0	0	0	0	1	0	0	0	0	0	0	0	0	0
Altit	Hunza	36.316102°	74.681835°	Bukpa	Allium sativum L.	Amaryllidaceae	bulb	3	Direct	Herb	0	0	0	0	0	0	0	1	1	0	0	0	0	0	0	0	0	0	0	1	0	0	0	0	0	0	0	0	0
Altit	Hunza	36.316102°	74.681835°	Bukpa	Allium sativum L.	Amaryllidaceae	bulb	3	Direct	Herb	0	0	0	0	0	0	0	1	0	0	0	0	0	0	1	0	0	0	0	1	0	0	0	0	0	0	0	0	0
Altit	Hunza	36.316102°	74.681835°	Bukpa	Allium sativum L.	Amaryllidaceae	bulb	2	Direct	Herb	0	0	0	0	0	0	0	0	1	0	0	0	0	0	1	0	0	0	0	0	0	0	0	0	0	0	0	0	0
Karimabad	Hunza	36.326408°	74.664316°	Bukpa	Allium sativum L.	Amaryllidaceae	bulb	3	Direct	Herb	0	0	0	0	0	0	0	1	1	0	0	0	0	0	1	0	0	0	0	0	0	0	0	0	0	0	0	0	0
Karimabad	Hunza	36.326408°	74.664316°	Bukpa	Allium sativum L.	Amaryllidaceae	bulb	3	Direct	Herb	0	0	0	0	0	0	0	1	1	0	0	0	0	0	1	0	0	0	0	0	0	0	0	0	0	0	0	0	0
Karimabad	Hunza	36.326408°	74.664316°	Bukpa	Allium sativum L.	Amaryllidaceae	bulb	3	Direct	Herb	0	0	0	0	0	0	0	1	0	0	0	0	0	0	1	0	0	0	0	1	0	0	0	0	0	0	0	0	0
Karimabad	Hunza	36.326408°	74.664316°	Bukpa	Allium sativum L.	Amaryllidaceae	bulb	4	Direct	Herb	0	0	0	0	0	0	0	1	1	0	0	0	0	0	1	0	0	0	0	1	0	0	0	0	0	0	0	0	0
Murtazaabad	Hunza	36.285517°	74.607833°	Bukpa	Allium sativum L.	Amaryllidaceae	bulb	4	Direct	Herb	0	0	0	0	0	0	0	1	1	0	0	0	0	0	1	0	0	0	0	1	0	0	0	0	0	0	0	0	0
Murtazaabad	Hunza	36.285517°	74.607833°	Bukpa	Allium sativum L.	Amaryllidaceae	bulb	3	Direct	Herb	0	0	0	0	0	0	0	1	1	0	0	0	0	0	0	0	0	0	0	1	0	0	0	0	0	0	0	0	0
Murtazaabad	Hunza	36.285517°	74.607833°	Bukpa	Allium sativum L.	Amaryllidaceae	bulb	3	Direct	Herb	0	0	0	0	0	0	0	1	1	0	0	0	0	0	1	0	0	0	0	0	0	0	0	0	0	0	0	0	0
Murtazaabad	Hunza	36.285517°	74.607833°	Bukpa	Allium sativum L.	Amaryllidaceae	bulb	3	Direct	Herb	0	0	0	0	0	0	0	0	1	0	0	0	0	0	1	0	0	0	0	1	0	0	0	0	0	0	0	0	0
Murtazaabad	Hunza	36.285517°	74.607833°	Bukpa	Allium sativum L.	Amaryllidaceae	bulb	4	Direct	Herb	0	0	0	0	0	0	0	1	1	0	0	0	0	0	1	0	0	0	0	1	0	0	0	0	0	0	0	0	0
Ghulmit	Nagar	36.241766°	74.462110°	Zgoqpa	Allium sativum L.	Amaryllidaceae	bulb	1	Direct	Herb	0	0	0	0	0	0	0	0	0	0	0	0	0	0	0	0	0	0	0	0	0	0	0	0	0	1	0	0	0
Ghulmit	Nagar	36.241766°	74.462110°	Bukpa	Allium sativum L.	Amaryllidaceae	bulb	2	Direct	Herb	0	0	0	0	0	0	0	1	0	0	0	0	0	0	1	0	0	0	0	0	0	0	0	0	0	0	0	0	0
Ghulmit	Nagar	36.241766°	74.462110°	Bukpa	Allium sativum L.	Amaryllidaceae	bulb	1	Direct	Herb	0	0	0	0	0	0	0	0	0	0	0	0	0	0	1	0	0	0	0	0	0	0	0	0	0	0	0	0	0
Ghulmit	Nagar	36.241766°	74.462110°	Bukpa	Allium sativum L.	Amaryllidaceae	bulb	4	Direct	Herb	0	0	0	0	0	0	0	1	1	0	0	0	0	0	1	0	0	0	0	1	0	0	0	0	0	0	0	0	0
Ghulmit	Nagar	36.241766°	74.462110°	Bukpa	Allium sativum L.	Amaryllidaceae	bulb	1	Direct	Herb	0	0	0	0	0	0	0	0	0	0	0	0	0	0	0	0	0	0	0	0	0	0	0	0	0	1	0	0	0
Ghulmit	Nagar	36.241766°	74.462110°	Bukpa	Allium sativum L.	Amaryllidaceae	bulb	2	Direct	Herb	0	0	0	0	0	0	0	0	1	0	0	0	0	0	1	0	0	0	0	0	0	0	0	0	0	0	0	0	0
Ghulmit	Nagar	36.241766°	74.462110°	Bukpa	Allium sativum L.	Amaryllidaceae	bulb	4	Direct	Herb	0	0	0	0	0	0	0	1	1	0	0	0	0	0	1	0	0	0	0	1	0	0	0	0	0	0	0	0	0
Ghulmit	Nagar	36.241766°	74.462110°	Bukpa	Allium sativum L.	Amaryllidaceae	bulb	4	Direct	Herb	0	0	0	0	0	0	0	1	1	0	0	0	0	0	1	0	0	0	0	1	0	0	0	0	0	0	0	0	0
Ghulmit	Nagar	36.241766°	74.462110°	Bukpa	Allium sativum L.	Amaryllidaceae	bulb	1	Direct	Herb	0	0	0	0	0	0	0	0	0	0	0	0	0	0	0	0	0	0	0	0	0	0	0	0	0	1	0	0	0
Ghulmit	Nagar	36.241766°	74.462110°	Bukpa	Allium sativum L.	Amaryllidaceae	bulb	1	Direct	Herb	0	0	0	0	0	0	0	0	0	0	0	0	0	0	0	0	0	0	0	0	0	0	0	0	0	1	0	0	0
Minapin	Nagar	36.250922°	74.536075°	Zgoqpa	Allium sativum L.	Amaryllidaceae	bulb	1	Direct	Herb	0	0	0	0	0	0	0	0	0	0	0	0	0	0	0	0	0	0	0	0	0	0	0	0	0	1	0	0	0
Minapin	Nagar	36.250922°	74.536075°	Bukpa	Allium sativum L.	Amaryllidaceae	bulb	2	Direct	Herb	0	0	0	0	0	0	0	1	0	0	0	0	0	0	1	0	0	0	0	0	0	0	0	0	0	0	0	0	0
Minapin	Nagar	36.250922°	74.536075°	Bukpa	Allium sativum L.	Amaryllidaceae	bulb	2	Direct	Herb	0	0	0	0	0	0	0	1	0	0	0	0	0	0	1	0	0	0	0	0	0	0	0	0	0	0	0	0	0
Minapin	Nagar	36.250922°	74.536075°	Bukpa	Allium sativum L.	Amaryllidaceae	bulb	2	Direct	Herb	0	0	0	0	0	0	0	1	0	0	0	0	0	0	1	0	0	0	0	0	0	0	0	0	0	0	0	0	0
Minapin	Nagar	36.250922°	74.536075°	Bukpa	Allium sativum L.	Amaryllidaceae	bulb	2	Direct	Herb	0	0	0	0	0	0	0	0	1	0	0	0	0	0	1	0	0	0	0	0	0	0	0	0	0	0	0	0	0
Minapin	Nagar	36.250922°	74.536075°	Bukpa	Allium sativum L.	Amaryllidaceae	bulb	4	Direct	Herb	0	0	0	0	0	0	0	1	1	0	0	0	0	0	1	0	0	0	0	1	0	0	0	0	0	0	0	0	0
Minapin	Nagar	36.250922°	74.536075°	Bukpa	Allium sativum L.	Amaryllidaceae	bulb	1	Direct	Herb	0	0	0	0	0	0	0	0	0	0	0	0	0	0	0	0	0	0	0	0	0	0	0	0	0	1	0	0	0
Minapin	Nagar	36.250922°	74.536075°	Bukpa	Allium sativum L.	Amaryllidaceae	bulb	2	Direct	Herb	0	0	0	0	0	0	0	0	1	0	0	0	0	0	1	0	0	0	0	0	0	0	0	0	0	0	0	0	0
Minapin	Nagar	36.250922°	74.536075°	Bukpa	Allium sativum L.	Amaryllidaceae	bulb	2	Direct	Herb	0	0	0	0	0	0	0	0	1	0	0	0	0	0	1	0	0	0	0	0	0	0	0	0	0	0	0	0	0
Minapin	Nagar	36.250922°	74.536075°	Bukpa	Allium sativum L.	Amaryllidaceae	bulb	4	Direct	Herb	0	0	0	0	0	0	0	1	1	0	0	0	0	0	1	0	0	0	0	1	0	0	0	0	0	0	0	0	0
Minapin	Nagar	36.250922°	74.536075°	Bukpa	Allium sativum L.	Amaryllidaceae	bulb	4	Direct	Herb	0	0	0	0	0	0	0	1	1	0	0	0	0	0	1	0	0	0	0	1	0	0	0	0	0	0	0	0	0
Nagar Khas	Nagar	36.276377°	74.719955°	Zgoqpa	Allium sativum L.	Amaryllidaceae	bulb	1	Direct	Herb	0	0	0	0	0	0	0	0	0	0	0	0	0	0	0	0	0	0	0	0	0	0	0	0	0	1	0	0	0
Nagar Khas	Nagar	36.276377°	74.719955°	Bukpa	Allium sativum L.	Amaryllidaceae	bulb	1	Direct	Herb	0	0	0	0	0	0	0	0	0	0	0	0	0	0	1	0	0	0	0	0	0	0	0	0	0	0	0	0	0
Nagar Khas	Nagar	36.276377°	74.719955°	Bukpa	Allium sativum L.	Amaryllidaceae	bulb	2	Direct	Herb	0	0	0	0	0	0	0	1	0	0	0	0	0	0	1	0	0	0	0	0	0	0	0	0	0	0	0	0	0
Nagar Khas	Nagar	36.276377°	74.719955°	Bukpa	Allium sativum L.	Amaryllidaceae	bulb	3	Direct	Herb	0	0	0	0	0	0	0	2	0	0	0	0	0	0	1	0	0	0	0	0	0	0	0	0	0	0	0	0	0
Nagar Khas	Nagar	36.276377°	74.719955°	Bukpa	Allium sativum L.	Amaryllidaceae	bulb	1	Direct	Herb	0	0	0	0	0	0	0	0	0	0	0	0	0	0	0	0	0	0	0	0	0	0	0	0	0	1	0	0	0
Nagar Khas	Nagar	36.276377°	74.719955°	Bukpa	Allium sativum L.	Amaryllidaceae	bulb	1	Direct	Herb	0	0	0	0	0	0	0	0	0	0	0	0	0	0	0	0	0	0	0	0	0	0	0	0	0	1	0	0	0
Nagar Khas	Nagar	36.276377°	74.719955°	Bukpa	Allium sativum L.	Amaryllidaceae	bulb	1	Direct	Herb	0	0	0	0	0	0	0	0	0	0	0	0	0	0	0	0	0	0	0	0	0	0	0	0	0	1	0	0	0
Nagar Khas	Nagar	36.276377°	74.719955°	Bukpa	Allium sativum L.	Amaryllidaceae	bulb	1	Direct	Herb	0	0	0	0	0	0	0	0	0	0	0	0	0	0	0	0	0	0	0	0	0	0	0	0	0	1	0	0	0
Phekar	Nagar	36.263297°	74.594568°	Zgoqpa	Allium sativum L.	Amaryllidaceae	bulb	1	Direct	Herb	0	0	0	0	0	0	0	0	0	0	0	0	0	0	0	0	0	0	0	0	0	0	0	0	0	1	0	0	0
Phekar	Nagar	36.263297°	74.594568°	Bukpa	Allium sativum L.	Amaryllidaceae	bulb	2	Direct	Herb	0	0	0	0	0	0	0	0	1	0	0	0	0	0	1	0	0	0	0	0	0	0	0	0	0	0	0	0	0
Phekar	Nagar	36.263297°	74.594568°	Bukpa	Allium sativum L.	Amaryllidaceae	bulb	1	Direct	Herb	0	0	0	0	0	0	0	0	0	0	0	0	0	0	0	0	0	0	0	0	0	0	0	0	0	1	0	0	0
Phekar	Nagar	36.263297°	74.594568°	Bukpa	Allium sativum L.	Amaryllidaceae	bulb	1	Direct	Herb	0	0	0	0	0	0	0	0	0	0	0	0	0	0	0	0	0	0	0	0	0	0	0	0	0	1	0	0	0
Phekar	Nagar	36.263297°	74.594568°	Bukpa	Allium sativum L.	Amaryllidaceae	bulb	4	Direct	Herb	0	0	0	0	0	0	0	1	1	0	0	0	0	0	1	0	0	0	0	1	0	0	0	0	0	0	0	0	0
Phekar	Nagar	36.263297°	74.594568°	Bukpa	Allium sativum L.	Amaryllidaceae	bulb	1	Direct	Herb	0	0	0	0	0	0	0	0	0	0	0	0	0	0	0	0	0	0	0	0	0	0	0	0	0	1	0	0	0
Phekar	Nagar	36.263297°	74.594568°	Bukpa	Allium sativum L.	Amaryllidaceae	bulb	1	Direct	Herb	0	0	0	0	0	0	0	0	0	0	0	0	0	0	0	0	0	0	0	0	0	0	0	0	0	1	0	0	0
Phekar	Nagar	36.263297°	74.594568°	Bukpa	Allium sativum L.	Amaryllidaceae	bulb	2	Direct	Herb	0	0	0	0	0	0	0	0	1	0	0	0	0	0	1	0	0	0	0	0	0	0	0	0	0	0	0	0	0
Phekar	Nagar	36.263297°	74.594568°	Bukpa	Allium sativum L.	Amaryllidaceae	bulb	1	Direct	Herb	0	0	0	0	0	0	0	0	0	0	0	0	0	0	0	0	0	0	0	0	0	0	0	0	0	1	0	0	0
Basho	Skardu	35.469494°	75.359156°	Zgoqpa	Allium sativum L.	Amaryllidaceae	bulb	1	Direct	Herb	0	0	0	0	0	0	0	0	0	0	0	0	0	0	0	0	0	0	0	0	0	0	0	0	0	1	0	0	0
Hashupi	Skardu	35.485929°	75.696578°	Zgoqpa	Allium sativum L.	Amaryllidaceae	bulb	1	Direct	Herb	0	0	0	0	0	0	0	0	0	0	0	0	0	0	0	0	0	0	0	0	0	0	0	0	0	1	0	0	0
Hashupi	Skardu	35.485929°	75.696578°	Zgoqpa	Allium sativum L.	Amaryllidaceae	bulb	1	Direct	Herb	0	0	0	0	0	0	0	0	0	0	0	0	0	0	0	0	0	0	0	0	0	0	0	0	0	1	0	0	0
Hosho	Skardu	35.345214°	75.515283°	Zgoqpa	Allium sativum L.	Amaryllidaceae	bulb	1	Direct	Herb	0	0	0	0	0	0	0	0	0	0	0	0	0	0	0	0	0	0	0	0	0	0	0	0	0	1	0	0	0
Thowar	Skardu	35.609167°	75.203611°	Zgoqpa	Allium sativum L.	Amaryllidaceae	bulb	1	Direct	Herb	0	0	0	0	0	0	0	0	0	0	0	0	0	0	0	0	0	0	0	0	0	0	0	0	0	1	0	0	0
Thowar	Skardu	35.609167°	75.203611°	Zgoqpa	Allium sativum L.	Amaryllidaceae	bulb	1	Direct	Herb	0	0	0	0	0	0	0	0	0	0	0	0	0	0	0	0	0	0	0	0	0	0	0	0	0	1	0	0	0
Kargha	Gilgit	35.915251°	74.257648°	Dhimdo	Amaranthus viridis L.	Amaranthaceae	leaves	1	Paste, direct	Herb	0	0	0	0	0	0	0	1	0	0	0	0	0	0	0	0	0	0	0	0	0	0	0	0	0	0	0	0	0
Kargha	Gilgit	35.915251°	74.257648°	Dhimdo	Amaranthus viridis L.	Amaranthaceae	leaves	1	Paste, direct	Herb	0	0	0	0	0	0	0	1	0	0	0	0	0	0	0	0	0	0	0	0	0	0	0	0	0	0	0	0	0
Kargha	Gilgit	35.915251°	74.257648°	Dhimdo	Amaranthus viridis L.	Amaranthaceae	leaves	1	Paste, direct	Herb	0	0	0	0	0	0	0	1	0	0	0	0	0	0	0	0	0	0	0	0	0	0	0	0	0	0	0	0	0
Kargha	Gilgit	35.915251°	74.257648°	Dhimdo	Amaranthus viridis L.	Amaranthaceae	leaves	1	Paste, direct	Herb	0	0	0	0	0	0	0	1	0	0	0	0	0	0	0	0	0	0	0	0	0	0	0	0	0	0	0	0	0
Kargha	Gilgit	35.915251°	74.257648°	Dhimdo	Amaranthus viridis L.	Amaranthaceae	leaves	1	Paste, direct	Herb	0	0	0	0	0	0	0	1	0	0	0	0	0	0	0	0	0	0	0	0	0	0	0	0	0	0	0	0	0
Rahimabad	Gilgit	36.118837°	74.297376°	Dhimdo	Amaranthus viridis L.	Amaranthaceae	leaves	1	Paste, direct	Herb	0	0	0	0	0	0	0	1	0	0	0	0	0	0	0	0	0	0	0	0	0	0	0	0	0	0	0	0	0
Ghulmit	Nagar	36.241766°	74.462110°	Dhimdo	Amaranthus viridis L.	Amaranthaceae	leaves	2	Paste, direct	Herb	0	1	0	0	0	0	0	1	0	0	0	0	0	0	0	0	0	0	0	0	0	0	0	0	0	0	0	0	0
Minapin	Nagar	36.250922°	74.536075°	Dhimdo	Amaranthus viridis L.	Amaranthaceae	leaves	2	Paste, direct	Herb	0	1	0	0	0	0	0	1	0	0	0	0	0	0	0	0	0	0	0	0	0	0	0	0	0	0	0	0	0
Gahkuch	Ghizer	36.162949°	73.755492°	Chikee	Anaphalis nepalensis	Compositae	flower, fruit	1	Dried flower, powder/grinded	Herb	0	0	0	0	0	0	0	1	0	0	0	0	0	0	0	0	0	0	0	0	0	0	0	0	0	0	0	0	0
Gahkuch	Ghizer	36.162949°	73.755492°	Chikee	Anaphalis nepalensis	Compositae	flower, fruit	1	Dried flower, powder/grinded	Herb	0	0	0	0	0	0	0	1	0	0	0	0	0	0	0	0	0	0	0	0	0	0	0	0	0	0	0	0	0
Gahkuch	Ghizer	36.162949°	73.755492°	Chikee	Anaphalis nepalensis	Compositae	flower, fruit	1	Dried flower, powder/grinded, fume	Herb	0	0	0	0	0	0	0	1	0	0	0	0	0	0	0	0	0	0	0	0	0	0	0	0	0	0	0	0	0
Gahkuch	Ghizer	36.162949°	73.755492°	Chikee	Anaphalis nepalensis	Compositae	flower, fruit	1	Dried flower, powder/grinded, fume	Herb	0	0	0	0	0	0	0	1	0	0	0	0	0	0	0	0	0	0	0	0	0	0	0	0	0	0	0	0	0
Yaseen	Ghizer	36.369354°	73.332552°	Chikee	Anaphalis nepalensis	Compositae	flower, fruit	1	Dried flower, powder/grinded	Herb	0	0	0	0	0	0	0	1	0	0	0	0	0	0	0	0	0	0	0	0	0	0	0	0	0	0	0	0	0
Yaseen	Ghizer	36.369354°	73.332552°	Chikee	Anaphalis nepalensis	Compositae	flower, fruit	1	Dried flower, powder/grinded	Herb	0	0	0	0	0	0	0	1	0	0	0	0	0	0	0	0	0	0	0	0	0	0	0	0	0	0	0	0	0
Yaseen	Ghizer	36.369354°	73.332552°	Chikee	Anaphalis nepalensis	Compositae	flower, fruit	1	Dried flower, powder/grinded, fume	Herb	0	0	0	0	0	0	0	1	0	0	0	0	0	0	0	0	0	0	0	0	0	0	0	0	0	0	0	0	0
Ghulkin	Hunza	36.407318°	74.863984°	Yeepwoosh	Anaphalis triplinervis (Sims) Sims ex C.B.Clarke	Compositae	leaves, flower	5	Poultice, dried leaves and flowers	Herb	0	0	0	0	0	1	0	0	0	0	0	0	0	0	0	0	2	0	0	0	1	0	0	0	1	0	0	0	0
Ghulkin	Hunza	36.407318°	74.863984°	Yeepwoosh	Anaphalis triplinervis (Sims) Sims ex C.B.Clarke	Compositae	leaves, flower	2	Poultice, dried leaves and flowers	Herb	0	0	0	0	0	1	0	0	0	0	0	0	0	0	0	0	1	0	0	0	0	0	0	0	0	0	0	0	0
Ghulkin	Hunza	36.407318°	74.863984°	Yeepwoosh	Anaphalis triplinervis (Sims) Sims ex C.B.Clarke	Compositae	leaves, flower	2	Poultice, dried leaves and flowers	Herb	0	0	0	0	0	1	0	0	0	0	0	0	0	0	0	0	1	0	0	0	0	0	0	0	0	0	0	0	0
Ghulkin	Hunza	36.407318°	74.863984°	Yeepwoosh	Anaphalis triplinervis (Sims) Sims ex C.B.Clarke	Compositae	leaves, flower	2	Poultice, dried leaves and flowers	Herb	0	0	0	0	0	1	0	0	0	0	0	0	0	0	0	0	1	0	0	0	0	0	0	0	0	0	0	0	0
Shimshal	Hunza	36.436464°	75.313109°	Yeepwoosh	Anaphalis triplinervis (Sims) Sims ex C.B.Clarke	Compositae	leaves, flower	5	Poultice, dried leaves and flowers	Herb	0	0	0	0	0	1	0	0	0	0	0	0	0	0	0	0	2	0	0	0	1	0	0	0	1	0	0	0	0
Shimshal	Hunza	36.436464°	75.313109°	Yeepwoosh	Anaphalis triplinervis (Sims) Sims ex C.B.Clarke	Compositae	leaves, flower	5	Poultice, dried leaves and flowers	Herb	0	0	0	0	0	1	0	0	0	0	0	0	0	0	0	0	2	0	0	0	1	0	0	0	1	0	0	0	0
Shimshal	Hunza	36.436464°	75.313109°	Yeepwoosh	Anaphalis triplinervis (Sims) Sims ex C.B.Clarke	Compositae	leaves, flower	3	Poultice, dried leaves and flowers	Herb	0	0	0	0	0	1	0	0	0	0	0	0	0	0	0	0	2	0	0	0	0	0	0	0	0	0	0	0	0
Gahkuch	Ghizer	36.162949°	73.755492°	Chora	Angelica glauca Edgew	Apiaceae	stem, seed, root	7	Decoction, powder/grinded, direct	Herb	1	2	1	1	0	0	0	0	0	0	0	0	0	0	0	0	1	0	0	0	0	0	1	0	0	0	0	0	0
Gahkuch	Ghizer	36.162949°	73.755492°	Chora	Angelica glauca Edgew	Apiaceae	stem, seed, root	6	Decoction, powder/grinded, direct	Herb	1	2	0	1	0	0	0	0	0	0	0	0	0	0	0	0	1	0	0	0	0	0	1	0	0	0	0	0	0
Yaseen	Ghizer	36.369354°	73.332552°	Chora	Angelica glauca Edgew	Apiaceae	stem, seed, root	8	Decoction, powder/grinded, direct	Herb	1	2	1	1	0	0	0	1	0	0	0	0	0	0	0	0	0	0	0	0	0	0	1	1	0	0	0	0	0
Yaseen	Ghizer	36.369354°	73.332552°	Chora	Angelica glauca Edgew	Apiaceae	stem, seed, root	5	Decoction, powder/grinded, direct	Herb	0	2	0	0	0	0	0	0	0	0	0	0	0	0	0	0	1	0	0	0	0	0	1	1	0	0	0	0	0
Yaseen	Ghizer	36.369354°	73.332552°	Chora	Angelica glauca Edgew	Apiaceae	stem, seed, root	4	Decoction, powder/grinded, direct	Herb	0	1	1	0	0	0	0	1	0	0	0	0	0	0	0	0	0	0	0	0	0	0	0	1	0	0	0	0	0
Yaseen	Ghizer	36.369354°	73.332552°	Chora	Angelica glauca Edgew	Apiaceae	stem, seed, root	4	Decoction, powder/grinded, direct	Herb	1	1	0	0	0	0	0	1	0	0	0	0	0	0	0	0	0	0	0	0	0	0	1	0	0	0	0	0	0
Yaseen	Ghizer	36.369354°	73.332552°	Chora	Angelica glauca Edgew	Apiaceae	stem, seed, root	6	Decoction, powder/grinded, direct	Herb	1	2	0	1	0	0	0	1	0	0	0	0	0	0	0	0	1	0	0	0	0	0	0	0	0	0	0	0	0
Kargha	Gilgit	35.915251°	74.257648°	Choro	Angelica glauca Edgew	Apiaceae	root	2	Decoction, powder/grinded	Herb	0	0	0	0	0	0	1	1	0	0	0	0	0	0	0	0	0	0	0	0	0	0	0	0	0	0	0	0	0
Kargha	Gilgit	35.915251°	74.257648°	Choro	Angelica glauca Edgew	Apiaceae	root	3	Decoction, powder/grinded	Herb	0	0	0	0	0	0	1	2	0	0	0	0	0	0	0	0	0	0	0	0	0	0	0	0	0	0	0	0	0
Kargha	Gilgit	35.915251°	74.257648°	Choro	Angelica glauca Edgew	Apiaceae	root	2	Decoction, powder/grinded	Herb	0	0	0	0	0	0	0	2	0	0	0	0	0	0	0	0	0	0	0	0	0	0	0	0	0	0	0	0	0
Kargha	Gilgit	35.915251°	74.257648°	Choro	Angelica glauca Edgew	Apiaceae	root	1	Decoction	Herb	0	0	0	0	0	0	0	1	0	0	0	0	0	0	0	0	0	0	0	0	0	0	0	0	0	0	0	0	0
Kargha	Gilgit	35.915251°	74.257648°	Choro	Angelica glauca Edgew	Apiaceae	root	2	Decoction, powder/grinded	Herb	0	0	0	0	0	0	1	1	0	0	0	0	0	0	0	0	0	0	0	0	0	0	0	0	0	0	0	0	0
Rahimabad	Gilgit	36.118837°	74.297376°	Choro	Angelica glauca Edgew	Apiaceae	root	3	Decoction, powder/grinded	Herb	0	0	0	0	0	0	1	2	0	0	0	0	0	0	0	0	0	0	0	0	0	0	0	0	0	0	0	0	0
Rahimabad	Gilgit	36.118837°	74.297376°	Choro	Angelica glauca Edgew	Apiaceae	root	2	Decoction, powder/grinded	Herb	0	0	0	0	0	0	1	1	0	0	0	0	0	0	0	0	0	0	0	0	0	0	0	0	0	0	0	0	0
Basho	Skardu	35.469494°	75.359156°	Karfo Koo-kuk	Aquilegia fragrans Benth.	Ranunculaceae	leaves, floral part	2	Paste, decoction	Herb	1	1	0	0	0	0	0	0	0	0	0	0	0	0	0	0	0	0	0	0	0	0	0	0	0	0	0	0	0
Basho	Skardu	35.469494°	75.359156°	Karfo Koo-kuk	Aquilegia fragrans Benth.	Ranunculaceae	leaves, floral part	3	Paste, decoction	Herb	1	2	0	0	0	0	0	0	0	0	0	0	0	0	0	0	0	0	0	0	0	0	0	0	0	0	0	0	0
Basho	Skardu	35.469494°	75.359156°	Karfo Koo-kuk	Aquilegia fragrans Benth.	Ranunculaceae	leaves, floral part	2	Paste, decoction	Herb	1	1	0	0	0	0	0	0	0	0	0	0	0	0	0	0	0	0	0	0	0	0	0	0	0	0	0	0	0
Hashupi	Skardu	35.485929°	75.696578°	Karfo Koo-kuk	Aquilegia fragrans Benth.	Ranunculaceae	leaves, floral part	1	Paste, decoction	Herb	1	0	0	0	0	0	0	0	0	0	0	0	0	0	0	0	0	0	0	0	0	0	0	0	0	0	0	0	0
Hashupi	Skardu	35.485929°	75.696578°	Karfo Koo-kuk	Aquilegia fragrans Benth.	Ranunculaceae	leaves, floral part	3	Paste, decoction	Herb	1	2	0	0	0	0	0	0	0	0	0	0	0	0	0	0	0	0	0	0	0	0	0	0	0	0	0	0	0
Hashupi	Skardu	35.485929°	75.696578°	Karfo Koo-kuk	Aquilegia fragrans Benth.	Ranunculaceae	leaves, floral part	3	Paste, decoction	Herb	1	2	0	0	0	0	0	0	0	0	0	0	0	0	0	0	0	0	0	0	0	0	0	0	0	0	0	0	0
Hashupi	Skardu	35.485929°	75.696578°	Karfo Koo-kuk	Aquilegia fragrans Benth.	Ranunculaceae	leaves, floral part	1	Paste, decoction	Herb	1	0	0	0	0	0	0	0	0	0	0	0	0	0	0	0	0	0	0	0	0	0	0	0	0	0	0	0	0
Basho	Skardu	35.469494°	75.359156°	Koo-kuk	Aquilegia pubiflora Wall. Ex Royle	Ranunculaceae	leaves, floral part	3	Paste	Herb	1	2	0	0	0	0	0	0	0	0	0	0	0	0	0	0	0	0	0	0	0	0	0	0	0	0	0	0	0
Hashupi	Skardu	35.485929°	75.696578°	Koo-kuk	Aquilegia pubiflora Wall. Ex Royle	Ranunculaceae	leaves, floral part	3	Paste	Herb	1	2	0	0	0	0	0	0	0	0	0	0	0	0	0	0	0	0	0	0	0	0	0	0	0	0	0	0	0
Hashupi	Skardu	35.485929°	75.696578°	Koo-kuk	Aquilegia pubiflora Wall. Ex Royle	Ranunculaceae	leaves, floral part	2	Paste	Herb	1	1	0	0	0	0	0	0	0	0	0	0	0	0	0	0	0	0	0	0	0	0	0	0	0	0	0	0	0
Hashupi	Skardu	35.485929°	75.696578°	Koo-kuk	Aquilegia pubiflora Wall. Ex Royle	Ranunculaceae	leaves, floral part	3	Paste	Herb	1	2	0	0	0	0	0	0	0	0	0	0	0	0	0	0	0	0	0	0	0	0	0	0	0	0	0	0	0
Hosho	Skardu	35.345214°	75.515283°	Koo-kuk	Aquilegia pubiflora Wall. Ex Royle	Ranunculaceae	leaves, floral part	2	Paste	Herb	1	1	0	0	0	0	0	0	0	0	0	0	0	0	0	0	0	0	0	0	0	0	0	0	0	0	0	0	0
Thowar	Skardu	35.609167°	75.203611°	Koo-kuk	Aquilegia pubiflora Wall. Ex Royle	Ranunculaceae	leaves, floral part	3	Paste	Herb	1	2	0	0	0	0	0	0	0	0	0	0	0	0	0	0	0	0	0	0	0	0	0	0	0	0	0	0	0
Thowar	Skardu	35.609167°	75.203611°	Koo-kuk	Aquilegia pubiflora Wall. Ex Royle	Ranunculaceae	leaves, floral part	2	Paste	Herb	1	1	0	0	0	0	0	0	0	0	0	0	0	0	0	0	0	0	0	0	0	0	0	0	0	0	0	0	0
Kargha	Gilgit	35.915251°	74.257648°	Zoon	Artemisia absinthium L.	Compositae	whole plant	3	Infusion, paste, powder/grinded	Herb	0	0	0	0	0	0	0	1	0	0	0	0	0	0	0	0	2	0	0	0	0	0	0	0	0	0	0	0	0
Kargha	Gilgit	35.915251°	74.257648°	Zoon	Artemisia absinthium L.	Compositae	whole plant	1	Paste	Herb	0	0	0	0	0	0	0	0	0	0	0	0	0	0	0	0	1	0	0	0	0	0	0	0	0	0	0	0	0
Kargha	Gilgit	35.915251°	74.257648°	Zoon	Artemisia absinthium L.	Compositae	whole plant	3	Infusion, paste, powder/grinded	Herb	0	0	0	0	0	0	0	1	0	0	0	0	0	0	0	0	2	0	0	0	0	0	0	0	0	0	0	0	0
Kargha	Gilgit	35.915251°	74.257648°	Zoon	Artemisia absinthium L.	Compositae	whole plant	3	Infusion, paste, powder/grinded	Herb	0	0	0	0	0	0	0	1	0	0	0	0	0	0	0	0	2	0	0	0	0	0	0	0	0	0	0	0	0
Rahimabad	Gilgit	36.118837°	74.297376°	Zoon	Artemisia absinthium L.	Compositae	whole plant	1	Infusion, paste	Herb	0	0	0	0	0	0	0	0	0	0	0	0	0	0	0	0	1	0	0	0	0	0	0	0	0	0	0	0	0
Rahimabad	Gilgit	36.118837°	74.297376°	Zoon	Artemisia absinthium L.	Compositae	whole plant	2	Infusion, paste	Herb	0	0	0	0	0	0	0	1	0	0	0	0	0	0	0	0	1	0	0	0	0	0	0	0	0	0	0	0	0
Rahimabad	Gilgit	36.118837°	74.297376°	Zoon	Artemisia absinthium L.	Compositae	whole plant	2	Infusion, paste	Herb	0	0	0	0	0	0	0	0	0	0	0	0	0	0	0	0	2	0	0	0	0	0	0	0	0	0	0	0	0
Nagar Khas	Nagar	36.276377°	74.719955°	Zoon	Artemisia absinthium L.	Compositae	whole plant	3	Infusion, paste, powder/grinded	Herb	0	0	0	0	0	0	0	1	0	0	0	0	0	0	0	0	2	0	0	0	0	0	0	0	0	0	0	0	0
Phekar	Nagar	36.263297°	74.594568°	Zoon	Artemisia absinthium L.	Compositae	whole plant	3	Infusion, paste, powder/grinded	Herb	0	0	0	0	0	0	0	1	0	0	0	0	0	0	0	0	2	0	0	0	0	0	0	0	0	0	0	0	0
Phekar	Nagar	36.263297°	74.594568°	Zoon	Artemisia absinthium L.	Compositae	whole plant	3	Infusion, paste, powder/grinded	Herb	0	0	0	0	0	0	0	1	0	0	0	0	0	0	0	0	2	0	0	0	0	0	0	0	0	0	0	0	0
Gahkuch	Ghizer	36.162949°	73.755492°	Xoon	Artemisia annua L.	Compositae	whole plant	4	Direct	Herb	0	0	0	0	0	0	0	1	1	0	0	0	0	0	0	0	2	0	0	0	0	0	0	0	0	0	0	0	0
Gahkuch	Ghizer	36.162949°	73.755492°	Xoon	Artemisia annua L.	Compositae	whole plant	3	Direct	Herb	0	0	0	0	0	0	0	1	1	0	0	0	0	0	0	0	1	0	0	0	0	0	0	0	0	0	0	0	0
Gahkuch	Ghizer	36.162949°	73.755492°	Xoon	Artemisia annua L.	Compositae	whole plant	3	Direct	Herb	0	0	0	0	0	0	0	0	1	0	0	0	0	0	0	0	2	0	0	0	0	0	0	0	0	0	0	0	0
Gahkuch	Ghizer	36.162949°	73.755492°	Xoon	Artemisia annua L.	Compositae	whole plant	2	Direct	Herb	0	0	0	0	0	0	0	1	0	0	0	0	0	0	0	0	1	0	0	0	0	0	0	0	0	0	0	0	0
Gahkuch	Ghizer	36.162949°	73.755492°	Xoon	Artemisia annua L.	Compositae	whole plant	3	Direct	Herb	0	0	0	0	0	0	0	1	1	0	0	0	0	0	0	0	1	0	0	0	0	0	0	0	0	0	0	0	0
Yaseen	Ghizer	36.369354°	73.332552°	Xoon	Artemisia annua L.	Compositae	whole plant	2	Direct	Herb	0	0	0	0	0	0	0	1	1	0	0	0	0	0	0	0	0	0	0	0	0	0	0	0	0	0	0	0	0
Yaseen	Ghizer	36.369354°	73.332552°	Xoon	Artemisia annua L.	Compositae	whole plant	2	Direct	Herb	0	0	0	0	0	0	0	0	0	0	0	0	0	0	0	0	2	0	0	0	0	0	0	0	0	0	0	0	0
Eidgah	Astore	35.347049°	74.857882°	Bustae	Artemisia brevifolia Wall	Compositae	whole plant	1	Direct, poultice	Herb	1	0	0	0	0	0	0	0	0	0	0	0	0	0	0	0	0	0	0	0	0	0	0	0	0	0	0	0	0
Eidgah	Astore	35.347049°	74.857882°	Bustae	Artemisia brevifolia Wall	Compositae	whole plant	1	Direct	Herb	1	0	0	0	0	0	0	0	0	0	0	0	0	0	0	0	0	0	0	0	0	0	0	0	0	0	0	0	0
Eidgah	Astore	35.347049°	74.857882°	Bustae	Artemisia brevifolia Wall	Compositae	whole plant	1	Direct	Herb	1	0	0	0	0	0	0	0	0	0	0	0	0	0	0	0	0	0	0	0	0	0	0	0	0	0	0	0	0
Eidgah	Astore	35.347049°	74.857882°	Bustae	Artemisia brevifolia Wall	Compositae	whole plant	1	Direct	Herb	1	0	0	0	0	0	0	0	0	0	0	0	0	0	0	0	0	0	0	0	0	0	0	0	0	0	0	0	0
Eidgah	Astore	35.347049°	74.857882°	Bustae	Artemisia brevifolia Wall	Compositae	whole plant	1	Direct	Herb	1	0	0	0	0	0	0	0	0	0	0	0	0	0	0	0	0	0	0	0	0	0	0	0	0	0	0	0	0
Gorikot	Astore	35.281969°	74.841940°	Bustae	Artemisia brevifolia Wall	Compositae	whole plant	1	Direct, poultice	Herb	1	0	0	0	0	0	0	0	0	0	0	0	0	0	0	0	0	0	0	0	0	0	0	0	0	0	0	0	0
Gahkuch	Ghizer	36.162949°	73.755492°	Bursay	Artemisia brevifolia Wall	Compositae	whole plant	1	Direct, poultice	Herb	0	0	0	0	0	0	0	1	0	0	0	0	0	0	0	0	0	0	0	0	0	0	0	0	0	0	0	0	0
Yaseen	Ghizer	36.369354°	73.332552°	Bursay	Artemisia brevifolia Wall	Compositae	whole plant	1	Direct, poultice	Herb	0	0	0	0	0	0	0	1	0	0	0	0	0	0	0	0	0	0	0	0	0	0	0	0	0	0	0	0	0
Yaseen	Ghizer	36.369354°	73.332552°	Bursay	Artemisia brevifolia Wall	Compositae	whole plant	1	Direct, poultice	Herb	0	0	0	0	0	0	0	1	0	0	0	0	0	0	0	0	0	0	0	0	0	0	0	0	0	0	0	0	0
Yaseen	Ghizer	36.369354°	73.332552°	Bursay	Artemisia brevifolia Wall	Compositae	whole plant	1	Direct, poultice	Herb	0	0	0	0	0	0	0	1	0	0	0	0	0	0	0	0	0	0	0	0	0	0	0	0	0	0	0	0	0
Yaseen	Ghizer	36.369354°	73.332552°	Bursay	Artemisia brevifolia Wall	Compositae	whole plant	1	Direct, poultice	Herb	0	0	0	0	0	0	0	1	0	0	0	0	0	0	0	0	0	0	0	0	0	0	0	0	0	0	0	0	0
Yaseen	Ghizer	36.369354°	73.332552°	Bursay	Artemisia brevifolia Wall	Compositae	whole plant	1	Direct, poultice	Herb	0	0	0	0	0	0	0	1	0	0	0	0	0	0	0	0	0	0	0	0	0	0	0	0	0	0	0	0	0
Kargha	Gilgit	35.915251°	74.257648°	Bursay	Artemisia brevifolia Wall	Compositae	leaves	2	Direct	Herb	1	0	0	0	0	0	0	1	0	0	0	0	0	0	0	0	0	0	0	0	0	0	0	0	0	0	0	0	0
Kargha	Gilgit	35.915251°	74.257648°	Bursay	Artemisia brevifolia Wall	Compositae	leaves	3	Direct	Herb	1	0	0	0	0	0	0	1	0	0	0	0	0	0	0	0	0	0	0	0	0	0	0	0	0	1	0	0	0
Kargha	Gilgit	35.915251°	74.257648°	Bursay	Artemisia brevifolia Wall	Compositae	leaves	2	Direct	Herb	1	0	0	0	0	0	0	0	0	0	0	0	0	0	0	0	0	0	0	0	0	0	0	0	0	1	0	0	0
Kargha	Gilgit	35.915251°	74.257648°	Bursay	Artemisia brevifolia Wall	Compositae	leaves	2	Direct	Herb	1	0	0	0	0	0	0	0	0	0	0	0	0	0	0	0	0	0	0	0	0	0	0	0	0	1	0	0	0
Rahimabad	Gilgit	36.118837°	74.297376°	Bursay	Artemisia brevifolia Wall	Compositae	leaves	2	Direct	Herb	1	0	0	0	0	0	0	1	0	0	0	0	0	0	0	0	0	0	0	0	0	0	0	0	0	0	0	0	0
Rahimabad	Gilgit	36.118837°	74.297376°	Bursay	Artemisia brevifolia Wall	Compositae	leaves	2	Direct	Herb	1	0	0	0	0	0	0	0	0	0	0	0	0	0	0	0	0	0	0	0	0	0	0	0	0	1	0	0	0
Rahimabad	Gilgit	36.118837°	74.297376°	Bursay	Artemisia brevifolia Wall	Compositae	leaves	2	Direct	Herb	1	0	0	0	0	0	0	1	0	0	0	0	0	0	0	0	0	0	0	0	0	0	0	0	0	0	0	0	0
Ghulkin	Hunza	36.407318°	74.863984°	Taroqtpesk	Artemisia brevifolia Wall	Compositae	leaves , flower	1		Herb	0	0	0	0	0	0	0	0	0	0	0	0	0	0	0	0	0	0	0	0	0	0	0	0	0	1	0	0	0
Ghulkin	Hunza	36.407318°	74.863984°	Taroqtpesk	Artemisia brevifolia Wall	Compositae	leaves , flower	1	Direct, poultice	Herb	0	0	0	0	0	0	0	0	0	0	0	0	0	0	0	0	0	0	0	0	0	0	0	0	0	1	0	0	0
Ghulkin	Hunza	36.407318°	74.863984°	Taroqtpesk	Artemisia brevifolia Wall	Compositae	leaves , flower	1	Direct	Herb	0	0	0	0	0	0	0	0	0	0	0	0	0	0	0	0	0	0	0	0	0	0	0	0	0	1	0	0	0
Ghulkin	Hunza	36.407318°	74.863984°	Taroqtpesk	Artemisia brevifolia Wall	Compositae	leaves , flower	1	Direct	Herb	0	0	0	0	0	0	0	0	0	0	0	0	0	0	0	0	0	0	0	0	0	0	0	0	0	1	0	0	0
Shimshal	Hunza	36.436464°	75.313109°	Taroqtpesk	Artemisia brevifolia Wall	Compositae	leaves , flower	1	Direct, poultice	Herb	0	0	0	0	0	0	0	0	0	0	0	0	0	0	0	0	0	0	0	0	0	0	0	0	0	1	0	0	0
Shimshal	Hunza	36.436464°	75.313109°	Taroqtpesk	Artemisia brevifolia Wall	Compositae	leaves , flower	1	Direct, poultice	Herb	0	0	0	0	0	0	0	0	0	0	0	0	0	0	0	0	0	0	0	0	0	0	0	0	0	1	0	0	0
Shimshal	Hunza	36.436464°	75.313109°	Taroqtpesk	Artemisia brevifolia Wall	Compositae	leaves , flower	1	Direct	Herb	0	0	0	0	0	0	0	0	0	0	0	0	0	0	0	0	0	0	0	0	0	0	0	0	0	1	0	0	0
Ghulmit	Nagar	36.241766°	74.462110°	Rooner	Artemisia brevifolia Wall	Compositae	leaves	3	Direct	Herb	1	0	0	0	0	0	0	1	0	0	0	0	0	0	0	0	0	0	0	0	0	0	0	0	0	1	0	0	0
Minapin	Nagar	36.250922°	74.536075°	Rooner	Artemisia brevifolia Wall	Compositae	leaves	3	Direct	Herb	1	0	0	0	0	0	0	1	0	0	0	0	0	0	0	0	0	0	0	0	0	0	0	0	0	1	0	0	0
Basho	Skardu	35.469494°	75.359156°	Bursay	Artemisia brevifolia Wall	Compositae	leaves	2	Direct, poultice	Herb	1	0	0	0	0	0	0	0	0	0	0	0	0	0	0	0	0	0	0	0	0	0	0	0	0	1	0	0	0
Basho	Skardu	35.469494°	75.359156°	Bursay	Artemisia brevifolia Wall	Compositae	leaves, flower	0		Herb	0	0	0	0	0	0	0	0	0	0	0	0	0	0	0	0	0	0	0	0	0	0	0	0	0	0	0	0	0
Basho	Skardu	35.469494°	75.359156°	Bursay	Artemisia brevifolia Wall	Compositae	leaves	3	Direct, poultice	Herb	1	0	0	0	0	0	0	1	0	0	0	0	0	0	0	0	0	0	0	0	0	0	0	0	0	1	0	0	0
Basho	Skardu	35.469494°	75.359156°	Bursay	Artemisia brevifolia Wall	Compositae	leaves	1		Herb	1	0	0	0	0	0	0	0	0	0	0	0	0	0	0	0	0	0	0	0	0	0	0	0	0	0	0	0	0
Hashupi	Skardu	35.485929°	75.696578°	Bursay	Artemisia brevifolia Wall	Compositae	leaves, flower	2	Direct, poultice	Herb	1	0	0	0	0	0	0	0	0	0	0	0	0	0	0	0	0	0	0	0	0	0	0	0	0	1	0	0	0
Hashupi	Skardu	35.485929°	75.696578°	Bursay	Artemisia brevifolia Wall	Compositae	leaves	3	Direct, poultice	Herb	1	0	0	0	0	0	0	1	0	0	0	0	0	0	0	0	0	0	0	0	0	0	0	0	0	1	0	0	0
Hashupi	Skardu	35.485929°	75.696578°	Bursay	Artemisia brevifolia Wall	Compositae	leaves, flower	2	Direct, poultice	Herb	0	0	0	0	0	0	0	1	0	0	0	0	0	0	0	0	0	0	0	0	0	0	0	0	0	1	0	0	0
Hashupi	Skardu	35.485929°	75.696578°	Bursay	Artemisia brevifolia Wall	Compositae	leaves, flower	0		Herb	0	0	0	0	0	0	0	0	0	0	0	0	0	0	0	0	0	0	0	0	0	0	0	0	0	0	0	0	0
Hashupi	Skardu	35.485929°	75.696578°	Bursay	Artemisia brevifolia Wall	Compositae	leaves, flower	2	Direct, poultice	Herb	1	0	0	0	0	0	0	1	0	0	0	0	0	0	0	0	0	0	0	0	0	0	0	0	0	0	0	0	0
Hosho	Skardu	35.345214°	75.515283°	Bursay	Artemisia brevifolia Wall	Compositae	leaves	3	Direct, poultice	Herb	1	0	0	0	0	0	0	1	0	0	0	0	0	0	0	0	0	0	0	0	0	0	0	0	0	1	0	0	0
Thowar	Skardu	35.609167°	75.203611°	Bursay	Artemisia brevifolia Wall	Compositae	leaves, flower	2	Direct, poultice	Herb	1	0	0	0	0	0	0	1	0	0	0	0	0	0	0	0	0	0	0	0	0	0	0	0	0	0	0	0	0
Thowar	Skardu	35.609167°	75.203611°	Bursay	Artemisia brevifolia Wall	Compositae	leaves	2	Direct, poultice	Herb	1	0	0	0	0	0	0	0	0	0	0	0	0	0	0	0	0	0	0	0	0	0	0	0	0	1	0	0	0
Gahkuch	Ghizer	36.162949°	73.755492°	Bursay	Artemisia dubia Wall. Ex Bess.	Compositae	whole plant	4	paste, powder/grinded	Herb	1	2	0	0	0	0	0	1	0	0	0	0	0	0	0	0	0	0	0	0	0	0	0	0	0	0	0	0	0
Gahkuch	Ghizer	36.162949°	73.755492°	Bursay	Artemisia dubia Wall. Ex Bess.	Compositae	whole plant	1	Powder/grinded	Herb	0	0	0	0	0	0	0	1	0	0	0	0	0	0	0	0	0	0	0	0	0	0	0	0	0	0	0	0	0
Gahkuch	Ghizer	36.162949°	73.755492°	Bursay	Artemisia dubia Wall. Ex Bess.	Compositae	whole plant	2	paste, powder/grinded	Herb	0	1	0	0	0	0	0	1	0	0	0	0	0	0	0	0	0	0	0	0	0	0	0	0	0	0	0	0	0
Gahkuch	Ghizer	36.162949°	73.755492°	Bursay	Artemisia dubia Wall. Ex Bess.	Compositae	whole plant	4	paste, powder/grinded	Herb	1	2	0	0	0	0	0	1	0	0	0	0	0	0	0	0	0	0	0	0	0	0	0	0	0	0	0	0	0
Yaseen	Ghizer	36.369354°	73.332552°	Bursay	Artemisia dubia Wall. Ex Bess.	Compositae	whole plant	5	paste, powder/grinded	Herb	1	2	0	0	0	0	0	2	0	0	0	0	0	0	0	0	0	0	0	0	0	0	0	0	0	0	0	0	0
Yaseen	Ghizer	36.369354°	73.332552°	Bursay	Artemisia dubia Wall. Ex Bess.	Compositae	whole plant	5	paste, powder/grinded	Herb	1	2	0	0	0	0	0	2	0	0	0	0	0	0	0	0	0	0	0	0	0	0	0	0	0	0	0	0	0
Basho	Skardu	35.469494°	75.359156°	Kho Bursay	Artemisia fragrans Willd	Compositae	Aerial	1	Powder/grinded	Herb	0	0	0	0	0	0	0	1	0	0	0	0	0	0	0	0	0	0	0	0	0	0	0	0	0	0	0	0	0
Basho	Skardu	35.469494°	75.359156°	Kho Bursay	Artemisia fragrans Willd	Compositae	Aerial	1	Powder/grinded	Herb	0	0	0	0	0	0	0	1	0	0	0	0	0	0	0	0	0	0	0	0	0	0	0	0	0	0	0	0	0
Hashupi	Skardu	35.485929°	75.696578°	Kho Bursay	Artemisia fragrans Willd	Compositae	Aerial	1	Powder/grinded	Herb	0	0	0	0	0	0	0	1	0	0	0	0	0	0	0	0	0	0	0	0	0	0	0	0	0	0	0	0	0
Hashupi	Skardu	35.485929°	75.696578°	Kho Bursay	Artemisia fragrans Willd	Compositae	Aerial	1	Powder/grinded	Herb	0	0	0	0	0	0	0	1	0	0	0	0	0	0	0	0	0	0	0	0	0	0	0	0	0	0	0	0	0
Hashupi	Skardu	35.485929°	75.696578°	Kho Bursay	Artemisia fragrans Willd	Compositae	Aerial	1	Powder/grinded	Herb	0	0	0	0	0	0	0	1	0	0	0	0	0	0	0	0	0	0	0	0	0	0	0	0	0	0	0	0	0
Hashupi	Skardu	35.485929°	75.696578°	Kho Bursay	Artemisia fragrans Willd	Compositae	Aerial	1	Powder/grinded	Herb	0	0	0	0	0	0	0	1	0	0	0	0	0	0	0	0	0	0	0	0	0	0	0	0	0	0	0	0	0
Gahkuch	Ghizer	36.162949°	73.755492°	Kho Bursay	Artemisia herba-alba Asso	Compositae	whole plant	2	Decoction	Herb	0	0	1	0	0	0	0	0	0	0	0	0	0	0	0	0	0	0	0	0	0	1	0	0	0	0	0	0	0
Gahkuch	Ghizer	36.162949°	73.755492°	Kho Bursay	Artemisia herba-alba Asso	Compositae	whole plant	2	Decoction	Herb	0	0	0	0	0	1	0	0	0	0	0	0	0	0	0	0	0	0	0	0	0	1	0	0	0	0	0	0	0
Yaseen	Ghizer	36.369354°	73.332552°	Kho Bursay	Artemisia herba-alba Asso	Compositae	whole plant	2	Decoction	Herb	0	0	1	0	0	1	0	0	0	0	0	0	0	0	0	0	0	0	0	0	0	0	0	0	0	0	0	0	0
Yaseen	Ghizer	36.369354°	73.332552°	Kho Bursay	Artemisia herba-alba Asso	Compositae	whole plant	0		Herb	0	0	0	0	0	0	0	0	0	0	0	0	0	0	0	0	0	0	0	0	0	0	0	0	0	0	0	0	0
Yaseen	Ghizer	36.369354°	73.332552°	Kho Bursay	Artemisia herba-alba Asso	Compositae	whole plant	2	Decoction	Herb	0	0	1	0	0	1	0	0	0	0	0	0	0	0	0	0	0	0	0	0	0	0	0	0	0	0	0	0	0
Yaseen	Ghizer	36.369354°	73.332552°	Kho Bursay	Artemisia herba-alba Asso	Compositae	whole plant	3	Decoction	Herb	0	0	1	0	0	1	0	0	0	0	0	0	0	0	0	0	0	0	0	0	0	1	0	0	0	0	0	0	0
Kargha	Gilgit	35.915251°	74.257648°	Khampa	Artemisia laciniata Willd.	Compositae	leaves	1	Paste	Herb	1	0	0	0	0	0	0	0	0	0	0	0	0	0	0	0	0	0	0	0	0	0	0	0	0	0	0	0	0
Kargha	Gilgit	35.915251°	74.257648°	Khampa	Artemisia laciniata Willd.	Compositae	leaves	1	Paste	Herb	1	0	0	0	0	0	0	0	0	0	0	0	0	0	0	0	0	0	0	0	0	0	0	0	0	0	0	0	0
Kargha	Gilgit	35.915251°	74.257648°	Khampa	Artemisia laciniata Willd.	Compositae	leaves	1	Paste	Herb	1	0	0	0	0	0	0	0	0	0	0	0	0	0	0	0	0	0	0	0	0	0	0	0	0	0	0	0	0
Kargha	Gilgit	35.915251°	74.257648°	Khampa	Artemisia laciniata Willd.	Compositae	leaves	1	Paste	Herb	1	0	0	0	0	0	0	0	0	0	0	0	0	0	0	0	0	0	0	0	0	0	0	0	0	0	0	0	0
Kargha	Gilgit	35.915251°	74.257648°	Khampa	Artemisia laciniata Willd.	Compositae	leaves	1	Paste	Herb	1	0	0	0	0	0	0	0	0	0	0	0	0	0	0	0	0	0	0	0	0	0	0	0	0	0	0	0	0
Rahimabad	Gilgit	36.118837°	74.297376°	Khampa	Artemisia laciniata Willd.	Compositae	leaves	1	Paste	Herb	1	0	0	0	0	0	0	0	0	0	0	0	0	0	0	0	0	0	0	0	0	0	0	0	0	0	0	0	0
Rahimabad	Gilgit	36.118837°	74.297376°	Khampa	Artemisia laciniata Willd.	Compositae	leaves	1	Paste	Herb	1	0	0	0	0	0	0	0	0	0	0	0	0	0	0	0	0	0	0	0	0	0	0	0	0	0	0	0	0
Eidgah	Astore	35.347049°	74.857882°	Rooner	Artemisia maritima L.	Compositae	flower	3	Direct, paste	Shrub	0	0	0	0	0	0	0	2	0	0	0	0	0	0	0	0	0	0	0	0	0	0	0	1	0	0	0	0	0
Gorikot	Astore	35.281969°	74.841940°	Rooner	Artemisia maritima L.	Compositae	flower	3	Direct, paste	Shrub	0	0	0	0	0	0	0	2	0	0	0	0	0	0	0	0	0	0	0	0	0	0	0	1	0	0	0	0	0
Jaglot	Astore	35.685000°	74.623889°	Rooner	Artemisia maritima L.	Compositae	flower	3	Direct, paste	Shrub	0	0	0	0	0	0	0	2	0	0	0	0	0	0	0	0	0	0	0	0	0	0	0	1	0	0	0	0	0
Rattu	Astore	35.168461°	74.791752°1	Rooner	Artemisia maritima L.	Compositae	flower	2	Direct, paste	Shrub	0	0	0	0	0	0	0	1	0	0	0	0	0	0	0	0	0	0	0	0	0	0	0	1	0	0	0	0	0
Rattu	Astore	35.168461°	74.791752°1	Rooner	Artemisia maritima L.	Compositae	flower	3	Direct, paste	Shrub	0	0	0	0	0	0	0	2	0	0	0	0	0	0	0	0	0	0	0	0	0	0	0	1	0	0	0	0	0
Rattu	Astore	35.168461°	74.791752°1	Rooner	Artemisia maritima L.	Compositae	flower	2	Direct, paste	Shrub	0	0	0	0	0	0	0	1	0	0	0	0	0	0	0	0	0	0	0	0	0	0	0	1	0	0	0	0	0
Gahkuch	Ghizer	36.162949°	73.755492°	Zoon	Artemisia maritima L.	Compositae	leaves, flower, bud	7	Direct, paste, decoction	Shrub	0	0	1	0	0	0	1	4	0	0	0	0	0	0	0	0	0	0	0	0	0	0	0	1	0	0	0	0	0
Gahkuch	Ghizer	36.162949°	73.755492°	Zoon	Artemisia maritima L.	Compositae	leaves, flower, bud	4	Direct, paste, decoction	Shrub	0	0	0	0	0	0	0	3	0	0	0	0	0	0	0	0	1	0	0	0	0	0	0	0	0	0	0	0	0
Gahkuch	Ghizer	36.162949°	73.755492°	Zoon	Artemisia maritima L.	Compositae	leaves, flower, bud	8	Direct, paste, decoction	Shrub	0	0	1	0	0	0	1	5	0	0	0	0	0	0	0	0	0	0	0	0	0	0	0	1	0	0	0	0	0
Gahkuch	Ghizer	36.162949°	73.755492°	Zoon	Artemisia maritima L.	Compositae	leaves, flower	6	Direct, paste, decoction	Shrub	0	0	1	0	0	0	1	2	0	0	0	0	0	0	0	0	1	0	0	0	0	0	0	1	0	0	0	0	0
Gahkuch	Ghizer	36.162949°	73.755492°	Zoon	Artemisia maritima L.	Compositae	leaves, flower, bud	4	Direct, paste, decoction	Shrub	0	0	0	0	0	0	0	3	0	0	0	0	0	0	0	0	1	0	0	0	0	0	0	0	0	0	0	0	0
Gahkuch	Ghizer	36.162949°	73.755492°	Zoon	Artemisia maritima L.	Compositae	leaves, flower	5	Direct, paste, decoction	Shrub	0	0	1	0	0	0	1	1	0	0	0	0	0	0	0	0	1	0	0	0	0	0	0	1	0	0	0	0	0
Yaseen	Ghizer	36.369354°	73.332552°	Zoon	Artemisia maritima L.	Compositae	leaves, flower	7	Direct, paste, decoction	Shrub	0	0	1	0	0	0	1	3	0	0	0	0	0	0	0	0	1	0	0	0	0	0	0	1	0	0	0	0	0
Yaseen	Ghizer	36.369354°	73.332552°	Zoon	Artemisia maritima L.	Compositae	leaves, flower	6	Direct, paste, decoction	Shrub	0	0	1	0	0	0	1	2	0	0	0	0	0	0	0	0	1	0	0	0	0	0	0	1	0	0	0	0	0
Yaseen	Ghizer	36.369354°	73.332552°	Zoon	Artemisia maritima L.	Compositae	leaves, flower	5	Direct, paste, decoction	Shrub	0	0	1	0	0	0	1	1	0	0	0	0	0	0	0	0	1	0	0	0	0	0	0	1	0	0	0	0	0
Yaseen	Ghizer	36.369354°	73.332552°	Zoon	Artemisia maritima L.	Compositae	leaves, flower, bud	7	Direct, paste, decoction	Shrub	0	0	1	0	0	0	1	4	0	0	0	0	0	0	0	0	0	0	0	0	0	0	0	1	0	0	0	0	0
Yaseen	Ghizer	36.369354°	73.332552°	Zoon	Artemisia maritima L.	Compositae	leaves, flower	7	Direct, paste, decoction	Shrub	0	0	1	0	0	0	1	3	0	0	0	0	0	0	0	0	1	0	0	0	0	0	0	1	0	0	0	0	0
Yaseen	Ghizer	36.369354°	73.332552°	Zoon	Artemisia maritima L.	Compositae	leaves, flower, bud	7	Direct, paste, decoction	Shrub	0	0	0	0	0	0	0	5	0	0	0	0	0	0	0	0	1	0	0	0	0	0	0	1	0	0	0	0	0
Kargha	Gilgit	35.915251°	74.257648°	Rooner	Artemisia maritima L.	Compositae	leaves, bud, flower	3	Direct, paste	Shrub	0	1	0	0	0	0	0	2	0	0	0	0	0	0	0	0	0	0	0	0	0	0	0	0	0	0	0	0	0
Kargha	Gilgit	35.915251°	74.257648°	Rooner	Artemisia maritima L.	Compositae	leaves, bud, flower	1	Direct, paste	Shrub	0	1	0	0	0	0	0	0	0	0	0	0	0	0	0	0	0	0	0	0	0	0	0	0	0	0	0	0	0
Kargha	Gilgit	35.915251°	74.257648°	Rooner	Artemisia maritima L.	Compositae	leaves, bud, flower	1	Direct, paste	Shrub	0	1	0	0	0	0	0	0	0	0	0	0	0	0	0	0	0	0	0	0	0	0	0	0	0	0	0	0	0
Kargha	Gilgit	35.915251°	74.257648°	Rooner	Artemisia maritima L.	Compositae	leaves, bud, flower	2	Direct, paste	Shrub	0	0	0	0	0	0	0	2	0	0	0	0	0	0	0	0	0	0	0	0	0	0	0	0	0	0	0	0	0
Kargha	Gilgit	35.915251°	74.257648°	Rooner	Artemisia maritima L.	Compositae	leaves, bud, flower	2	Direct, paste	Shrub	0	0	0	0	0	0	0	2	0	0	0	0	0	0	0	0	0	0	0	0	0	0	0	0	0	0	0	0	0
Kargha	Gilgit	35.915251°	74.257648°	Rooner	Artemisia maritima L.	Compositae	leaves, bud, flower	1	Direct, paste	Shrub	0	0	0	0	0	0	0	1	0	0	0	0	0	0	0	0	0	0	0	0	0	0	0	0	0	0	0	0	0
Kargha	Gilgit	35.915251°	74.257648°	Zoon	Artemisia maritima L.	Compositae	Leaves	1	Direct, paste	Shrub	0	1	0	0	0	0	0	0	0	0	0	0	0	0	0	0	0	0	0	0	0	0	0	0	0	0	0	0	0
Kargha	Gilgit	35.915251°	74.257648°	Zoon	Artemisia maritima L.	Compositae	Leaves	1	Direct, paste	Shrub	0	1	0	0	0	0	0	0	0	0	0	0	0	0	0	0	0	0	0	0	0	0	0	0	0	0	0	0	0
Kargha	Gilgit	35.915251°	74.257648°	Zoon	Artemisia maritima L.	Compositae	Leaves	1	Direct, paste	Shrub	0	1	0	0	0	0	0	0	0	0	0	0	0	0	0	0	0	0	0	0	0	0	0	0	0	0	0	0	0
Kargha	Gilgit	35.915251°	74.257648°	Zoon	Artemisia maritima L.	Compositae	Leaves	1	Direct, paste	Shrub	0	1	0	0	0	0	0	0	0	0	0	0	0	0	0	0	0	0	0	0	0	0	0	0	0	0	0	0	0
Rahimabad	Gilgit	36.118837°	74.297376°	Rooner	Artemisia maritima L.	Compositae	leaves, bud, flower	3	Direct, paste	Shrub	0	1	0	0	0	0	0	2	0	0	0	0	0	0	0	0	0	0	0	0	0	0	0	0	0	0	0	0	0
Rahimabad	Gilgit	36.118837°	74.297376°	Zoon	Artemisia maritima L.	Compositae	Leaves	1	Direct, paste	Shrub	0	1	0	0	0	0	0	0	0	0	0	0	0	0	0	0	0	0	0	0	0	0	0	0	0	0	0	0	0
Rahimabad	Gilgit	36.118837°	74.297376°	Zoon	Artemisia maritima L.	Compositae	Leaves	1	Direct, paste	Shrub	0	1	0	0	0	0	0	0	0	0	0	0	0	0	0	0	0	0	0	0	0	0	0	0	0	0	0	0	0
Rahimabad	Gilgit	36.118837°	74.297376°	Zoon	Artemisia maritima L.	Compositae	Leaves	1	Direct, paste	Shrub	0	1	0	0	0	0	0	0	0	0	0	0	0	0	0	0	0	0	0	0	0	0	0	0	0	0	0	0	0
Aliabad	Hunza	36.308563°	74.619496°	Zoon	Artemisia maritima L.	Compositae	shoot	4	Direct, paste	Shrub	0	1	0	0	0	0	0	3	0	0	0	0	0	0	0	0	0	0	0	0	0	0	0	0	0	0	0	0	0
Aliabad	Hunza	36.308563°	74.619496°	Zoon	Artemisia maritima L.	Compositae	shoot	6	Direct, paste	Shrub	0	0	0	0	0	1	0	2	1	0	1	0	0	0	0	0	1	0	0	0	0	0	0	0	0	0	0	0	0
Aliabad	Hunza	36.308563°	74.619496°	Zoon	Artemisia maritima L.	Compositae	shoot	4	Direct, paste	Shrub	0	1	0	0	0	0	0	3	0	0	0	0	0	0	0	0	0	0	0	0	0	0	0	0	0	0	0	0	0
Aliabad	Hunza	36.308563°	74.619496°	Zoon	Artemisia maritima L.	Compositae	shoot	6	Direct, paste	Shrub	0	0	0	0	0	1	0	2	1	0	1	0	0	0	0	0	1	0	0	0	0	0	0	0	0	0	0	0	0
Aliabad	Hunza	36.308563°	74.619496°	Zoon	Artemisia maritima L.	Compositae	shoot	4	Direct, paste	Shrub	0	1	0	0	0	0	0	3	0	0	0	0	0	0	0	0	0	0	0	0	0	0	0	0	0	0	0	0	0
Aliabad	Hunza	36.308563°	74.619496°	Zoon	Artemisia maritima L.	Compositae	shoot	6	Direct, paste	Shrub	0	0	0	0	0	1	0	2	1	0	1	0	0	0	0	0	1	0	0	0	0	0	0	0	0	0	0	0	0
Aliabad	Hunza	36.308563°	74.619496°	Zoon	Artemisia maritima L.	Compositae	shoot	4	Direct, paste	Shrub	0	1	0	0	0	0	0	3	0	0	0	0	0	0	0	0	0	0	0	0	0	0	0	0	0	0	0	0	0
Altit	Hunza	36.316102°	74.681835°	Zoon	Artemisia maritima L.	Compositae	shoot	4	Direct, paste	Shrub	0	1	0	0	0	0	0	3	0	0	0	0	0	0	0	0	0	0	0	0	0	0	0	0	0	0	0	0	0
Altit	Hunza	36.316102°	74.681835°	Zoon	Artemisia maritima L.	Compositae	shoot	4	Direct, paste	Shrub	0	1	0	0	0	0	0	3	0	0	0	0	0	0	0	0	0	0	0	0	0	0	0	0	0	0	0	0	0
Altit	Hunza	36.316102°	74.681835°	Zoon	Artemisia maritima L.	Compositae	shoot	6	Direct, paste	Shrub	0	0	0	0	0	1	0	2	1	0	1	0	0	0	0	0	1	0	0	0	0	0	0	0	0	0	0	0	0
Altit	Hunza	36.316102°	74.681835°	Zoon	Artemisia maritima L.	Compositae	shoot	6	Direct, paste	Shrub	0	0	0	0	0	1	0	2	1	0	1	0	0	0	0	0	1	0	0	0	0	0	0	0	0	0	0	0	0
Altit	Hunza	36.316102°	74.681835°	Zoon	Artemisia maritima L.	Compositae	shoot	4	Direct, paste	Shrub	0	1	0	0	0	0	0	3	0	0	0	0	0	0	0	0	0	0	0	0	0	0	0	0	0	0	0	0	0
Karimabad	Hunza	36.326408°	74.664316°	Zoon	Artemisia maritima L.	Compositae	shoot	4	Direct, paste	Shrub	0	1	0	0	0	0	0	3	0	0	0	0	0	0	0	0	0	0	0	0	0	0	0	0	0	0	0	0	0
Karimabad	Hunza	36.326408°	74.664316°	Zoon	Artemisia maritima L.	Compositae	shoot	4	Direct, paste	Shrub	0	1	0	0	0	0	0	3	0	0	0	0	0	0	0	0	0	0	0	0	0	0	0	0	0	0	0	0	0
Karimabad	Hunza	36.326408°	74.664316°	Zoon	Artemisia maritima L.	Compositae	shoot	6	Direct, paste	Shrub	0	0	0	0	0	1	0	2	1	0	1	0	0	0	0	0	1	0	0	0	0	0	0	0	0	0	0	0	0
Murtazaabad	Hunza	36.285517°	74.607833°	Zoon	Artemisia maritima L.	Compositae	shoot	6	Direct, paste	Shrub	0	0	0	0	0	1	0	2	1	0	1	0	0	0	0	0	1	0	0	0	0	0	0	0	0	0	0	0	0
Murtazaabad	Hunza	36.285517°	74.607833°	Zoon	Artemisia maritima L.	Compositae	shoot	6	Direct, paste	Shrub	0	0	0	0	0	1	0	2	1	0	1	0	0	0	0	0	1	0	0	0	0	0	0	0	0	0	0	0	0
Murtazaabad	Hunza	36.285517°	74.607833°	Zoon	Artemisia maritima L.	Compositae	shoot	6	Direct, paste	Shrub	0	0	0	0	0	1	0	2	1	0	1	0	0	0	0	0	1	0	0	0	0	0	0	0	0	0	0	0	0
Murtazaabad	Hunza	36.285517°	74.607833°	Zoon	Artemisia maritima L.	Compositae	shoot	4	Direct, paste	Shrub	0	1	0	0	0	0	0	3	0	0	0	0	0	0	0	0	0	0	0	0	0	0	0	0	0	0	0	0	0
Murtazaabad	Hunza	36.285517°	74.607833°	Zoon	Artemisia maritima L.	Compositae	shoot	6	Direct, paste	Shrub	0	0	0	0	0	1	0	2	1	0	1	0	0	0	0	0	1	0	0	0	0	0	0	0	0	0	0	0	0
Hopar	Nagar	36.225179°	74.754189°	Rooner	Artemisia maritima L.	Compositae	leaves, bud, flower	3	Direct, paste	Shrub	0	1	0	0	0	0	0	2	0	0	0	0	0	0	0	0	0	0	0	0	0	0	0	0	0	0	0	0	0
Nagar Khas	Nagar	36.276377°	74.719955°	Rooner	Artemisia maritima L.	Compositae	leaves, bud, flower	3	Direct, paste	Shrub	0	1	0	0	0	0	0	2	0	0	0	0	0	0	0	0	0	0	0	0	0	0	0	0	0	0	0	0	0
Phekar	Nagar	36.263297°	74.594568°	Rooner	Artemisia maritima L.	Compositae	leaves, bud, flower	3	Direct, paste	Shrub	0	1	0	0	0	0	0	2	0	0	0	0	0	0	0	0	0	0	0	0	0	0	0	0	0	0	0	0	0
Basho	Skardu	35.469494°	75.359156°	Bursay	Artemisia maritima L.	Compositae	leaves	2	Direct, paste	Shrub	0	0	0	0	0	0	0	2	0	0	0	0	0	0	0	0	0	0	0	0	0	0	0	0	0	0	0	0	0
Basho	Skardu	35.469494°	75.359156°	Bursay	Artemisia maritima L.	Compositae	leaves	2	Direct, paste	Shrub	0	0	0	0	0	0	0	2	0	0	0	0	0	0	0	0	0	0	0	0	0	0	0	0	0	0	0	0	0
Hashupi	Skardu	35.485929°	75.696578°	Bursay	Artemisia maritima L.	Compositae	leaves	1	Direct, paste	Shrub	0	0	0	0	0	0	0	1	0	0	0	0	0	0	0	0	0	0	0	0	0	0	0	0	0	0	0	0	0
Hashupi	Skardu	35.485929°	75.696578°	Bursay	Artemisia maritima L.	Compositae	leaves	1	Direct, paste	Shrub	0	0	0	0	0	0	0	1	0	0	0	0	0	0	0	0	0	0	0	0	0	0	0	0	0	0	0	0	0
Hosho	Skardu	35.345214°	75.515283°	Bursay	Artemisia maritima L.	Compositae	leaves	2	Direct, paste	Shrub	0	0	0	0	0	0	0	2	0	0	0	0	0	0	0	0	0	0	0	0	0	0	0	0	0	0	0	0	0
Thowar	Skardu	35.609167°	75.203611°	Bursay	Artemisia maritima L.	Compositae	leaves	2	Direct, paste	Shrub	0	0	0	0	0	0	0	2	0	0	0	0	0	0	0	0	0	0	0	0	0	0	0	0	0	0	0	0	0
Kargha	Gilgit	35.915251°	74.257648°	Kho Bursay	Artemisia rutifolia Spreng. Ex Spreng	Compositae	Aerial	1	Paste	Herb	0	0	0	0	0	0	0	1	0	0	0	0	0	0	0	0	0	0	0	0	0	0	0	0	0	0	0	0	0
Kargha	Gilgit	35.915251°	74.257648°	Kho Bursay	Artemisia rutifolia Spreng. Ex Spreng	Compositae	Aerial	1	Paste	Herb	0	0	0	0	0	0	0	1	0	0	0	0	0	0	0	0	0	0	0	0	0	0	0	0	0	0	0	0	0
Kargha	Gilgit	35.915251°	74.257648°	Kho Bursay	Artemisia rutifolia Spreng. Ex Spreng	Compositae	Aerial	1	Paste	Herb	0	0	0	0	0	0	0	1	0	0	0	0	0	0	0	0	0	0	0	0	0	0	0	0	0	0	0	0	0
Kargha	Gilgit	35.915251°	74.257648°	Kho Bursay	Artemisia rutifolia Spreng. Ex Spreng	Compositae	Aerial	1	Paste	Herb	0	0	0	0	0	0	0	1	0	0	0	0	0	0	0	0	0	0	0	0	0	0	0	0	0	0	0	0	0
Rahimabad	Gilgit	36.118837°	74.297376°	Kho Bursay	Artemisia rutifolia Spreng. Ex Spreng	Compositae	Aerial	1	Paste	Herb	0	0	0	0	0	0	0	1	0	0	0	0	0	0	0	0	0	0	0	0	0	0	0	0	0	0	0	0	0
Rahimabad	Gilgit	36.118837°	74.297376°	Kho Bursay	Artemisia rutifolia Spreng. Ex Spreng	Compositae	Aerial	1	Paste	Herb	0	0	0	0	0	0	0	1	0	0	0	0	0	0	0	0	0	0	0	0	0	0	0	0	0	0	0	0	0
Rahimabad	Gilgit	36.118837°	74.297376°	Kho Bursay	Artemisia rutifolia Spreng. Ex Spreng	Compositae	Aerial	1	Paste	Herb	0	0	0	0	0	0	0	1	0	0	0	0	0	0	0	0	0	0	0	0	0	0	0	0	0	0	0	0	0
Basho	Skardu	35.469494°	75.359156°	Kho Bursay	Artemisia santolinifolia Turcz. Ex Krasch.	Compositae	leaves, stem	1	Powder/grinded, paste	Herb	1	0	0	0	0	0	0	0	0	0	0	0	0	0	0	0	0	0	0	0	0	0	0	0	0	0	0	0	0
Hashupi	Skardu	35.485929°	75.696578°	Kho Bursay	Artemisia santolinifolia Turcz. Ex Krasch.	Compositae	leaves, stem	2	Powder/grinded, paste	Herb	1	0	0	0	0	0	0	1	0	0	0	0	0	0	0	0	0	0	0	0	0	0	0	0	0	0	0	0	0
Hashupi	Skardu	35.485929°	75.696578°	Kho Bursay	Artemisia santolinifolia Turcz. Ex Krasch.	Compositae	leaves, stem	1	Powder/grinded, paste	Herb	1	0	0	0	0	0	0	0	0	0	0	0	0	0	0	0	0	0	0	0	0	0	0	0	0	0	0	0	0
Hashupi	Skardu	35.485929°	75.696578°	Kho Bursay	Artemisia santolinifolia Turcz. Ex Krasch.	Compositae	leaves, stem	2	Powder/grinded, paste	Herb	1	0	0	0	0	0	0	1	0	0	0	0	0	0	0	0	0	0	0	0	0	0	0	0	0	0	0	0	0
Hashupi	Skardu	35.485929°	75.696578°	Kho Bursay	Artemisia santolinifolia Turcz. Ex Krasch.	Compositae	leaves, stem	2	Powder/grinded, paste	Herb	1	0	0	0	0	0	0	1	0	0	0	0	0	0	0	0	0	0	0	0	0	0	0	0	0	0	0	0	0
Thowar	Skardu	35.609167°	75.203611°	Kho Bursay	Artemisia santolinifolia Turcz. Ex Krasch.	Compositae	leaves, stem	2	Powder/grinded, paste	Herb	1	0	0	0	0	0	0	1	0	0	0	0	0	0	0	0	0	0	0	0	0	0	0	0	0	0	0	0	0
Gahkuch	Ghizer	36.162949°	73.755492°	Khobustae	Artemisia scoparia Waldst. & Kitam.	Compositae	whole plant	1	fume	Herb	0	0	1	0	0	0	0	0	0	0	0	0	0	0	0	0	0	0	0	0	0	0	0	0	0	0	0	0	0
Gahkuch	Ghizer	36.162949°	73.755492°	Khobustae	Artemisia scoparia Waldst. & Kitam.	Compositae	whole plant	1	fume	Herb	0	0	1	0	0	0	0	0	0	0	0	0	0	0	0	0	0	0	0	0	0	0	0	0	0	0	0	0	0
Yaseen	Ghizer	36.369354°	73.332552°	Khobustae	Artemisia scoparia Waldst. & Kitam.	Compositae	whole plant	2	Paste, decoction, fume	Herb	0	1	1	0	0	0	0	0	0	0	0	0	0	0	0	0	0	0	0	0	0	0	0	0	0	0	0	0	0
Yaseen	Ghizer	36.369354°	73.332552°	Khobustae	Artemisia scoparia Waldst. & Kitam.	Compositae	whole plant	2	Paste, decoction, fume	Herb	0	1	1	0	0	0	0	0	0	0	0	0	0	0	0	0	0	0	0	0	0	0	0	0	0	0	0	0	0
Yaseen	Ghizer	36.369354°	73.332552°	Khobustae	Artemisia scoparia Waldst. & Kitam.	Compositae	whole plant	2	fume	Herb	0	1	1	0	0	0	0	0	0	0	0	0	0	0	0	0	0	0	0	0	0	0	0	0	0	0	0	0	0
Yaseen	Ghizer	36.369354°	73.332552°	Khobustae	Artemisia scoparia Waldst. & Kitam.	Compositae	whole plant	2	fume	Herb	0	1	1	0	0	0	0	0	0	0	0	0	0	0	0	0	0	0	0	0	0	0	0	0	0	0	0	0	0
Kargha	Gilgit	35.915251°	74.257648°	Khobustae	Artemisia scoparia Waldst. & Kitam.	Compositae	flower and leaves	4	Paste	Herb	0	0	3	0	0	0	0	1	0	0	0	0	0	0	0	0	0	0	0	0	0	0	0	0	0	0	0	0	0
Kargha	Gilgit	35.915251°	74.257648°	Khobustae	Artemisia scoparia Waldst. & Kitam.	Compositae	flower and leaves	4	Paste	Herb	0	0	3	0	0	0	0	1	0	0	0	0	0	0	0	0	0	0	0	0	0	0	0	0	0	0	0	0	0
Kargha	Gilgit	35.915251°	74.257648°	Khobustae	Artemisia scoparia Waldst. & Kitam.	Compositae	flower and leaves	4	Paste	Herb	0	0	3	0	0	0	0	1	0	0	0	0	0	0	0	0	0	0	0	0	0	0	0	0	0	0	0	0	0
Kargha	Gilgit	35.915251°	74.257648°	Khobustae	Artemisia scoparia Waldst. & Kitam.	Compositae	flower and leaves	3	Paste	Herb	0	0	2	0	0	0	0	1	0	0	0	0	0	0	0	0	0	0	0	0	0	0	0	0	0	0	0	0	0
Kargha	Gilgit	35.915251°	74.257648°	Khobustae	Artemisia scoparia Waldst. & Kitam.	Compositae	flower and leaves	3	Paste	Herb	0	0	2	0	0	0	0	1	0	0	0	0	0	0	0	0	0	0	0	0	0	0	0	0	0	0	0	0	0
Rahimabad	Gilgit	36.118837°	74.297376°	Khobustae	Artemisia scoparia Waldst. & Kitam.	Compositae	flower and leaves	4	Paste	Herb	0	0	3	0	0	0	0	1	0	0	0	0	0	0	0	0	0	0	0	0	0	0	0	0	0	0	0	0	0
Rahimabad	Gilgit	36.118837°	74.297376°	Khobustae	Artemisia scoparia Waldst. & Kitam.	Compositae	flower and leaves	3	Paste	Herb	0	0	2	0	0	0	0	1	0	0	0	0	0	0	0	0	0	0	0	0	0	0	0	0	0	0	0	0	0
Basho	Skardu	35.469494°	75.359156°	Khobustae	Artemisia scoparia Waldst. & Kitam.	Compositae	flower and leaves	1	Paste, decoction	Herb	0	0	1	0	0	0	0	0	0	0	0	0	0	0	0	0	0	0	0	0	0	0	0	0	0	0	0	0	0
Basho	Skardu	35.469494°	75.359156°	Khobustae	Artemisia scoparia Waldst. & Kitam.	Compositae	flower and leaves	1	Paste, decoction	Herb	0	0	0	0	0	0	0	1	0	0	0	0	0	0	0	0	0	0	0	0	0	0	0	0	0	0	0	0	0
Basho	Skardu	35.469494°	75.359156°	Khobustae	Artemisia scoparia Waldst. & Kitam.	Compositae	flower and leaves	1	Paste, decoction	Herb	0	0	1	0	0	0	0	0	0	0	0	0	0	0	0	0	0	0	0	0	0	0	0	0	0	0	0	0	0
Hashupi	Skardu	35.485929°	75.696578°	Khobustae	Artemisia scoparia Waldst. & Kitam.	Compositae	flower and leaves	1	Paste, decoction	Herb	0	0	0	0	0	0	0	1	0	0	0	0	0	0	0	0	0	0	0	0	0	0	0	0	0	0	0	0	0
Hosho	Skardu	35.345214°	75.515283°	Khobustae	Artemisia scoparia Waldst. & Kitam.	Compositae	flower and leaves	2	Paste, decoction	Herb	0	0	1	0	0	0	0	1	0	0	0	0	0	0	0	0	0	0	0	0	0	0	0	0	0	0	0	0	0
Thowar	Skardu	35.609167°	75.203611°	Khobustae	Artemisia scoparia Waldst. & Kitam.	Compositae	flower and leaves	2	Paste, decoction	Herb	0	0	1	0	0	0	0	1	0	0	0	0	0	0	0	0	0	0	0	0	0	0	0	0	0	0	0	0	0
Eidgah	Astore	35.347049°	74.857882°	Hampa	Artemisia sieversiana Ehrh.	Compositae	leaves	1	Infusion, decoction, paste	Shrub	0	0	0	0	0	0	0	0	1	0	0	0	0	0	0	0	0	0	0	0	0	0	0	0	0	0	0	0	0
Eidgah	Astore	35.347049°	74.857882°	Hampa	Artemisia sieversiana Ehrh.	Compositae	leaves	1	Infusion, decoction, paste	Shrub	0	0	0	0	0	0	0	0	1	0	0	0	0	0	0	0	0	0	0	0	0	0	0	0	0	0	0	0	0
Eidgah	Astore	35.347049°	74.857882°	Hampa	Artemisia sieversiana Ehrh.	Compositae	leaves	1	Decoction, paste	Shrub	0	0	0	0	0	0	0	0	1	0	0	0	0	0	0	0	0	0	0	0	0	0	0	0	0	0	0	0	0
Eidgah	Astore	35.347049°	74.857882°	Hampa	Artemisia sieversiana Ehrh.	Compositae	leaves	1	Decoction, paste	Shrub	0	0	0	0	0	0	0	0	1	0	0	0	0	0	0	0	0	0	0	0	0	0	0	0	0	0	0	0	0
Gorikot	Astore	35.281969°	74.841940°	Hampa	Artemisia sieversiana Ehrh.	Compositae	leaves	1	Infusion, decoction, paste	Shrub	0	0	0	0	0	0	0	0	1	0	0	0	0	0	0	0	0	0	0	0	0	0	0	0	0	0	0	0	0
Gorikot	Astore	35.281969°	74.841940°	Hampa	Artemisia sieversiana Ehrh.	Compositae	leaves	1	Infusion, decoction, paste	Shrub	0	0	0	0	0	0	0	0	1	0	0	0	0	0	0	0	0	0	0	0	0	0	0	0	0	0	0	0	0
Gorikot	Astore	35.281969°	74.841940°	Hampa	Artemisia sieversiana Ehrh.	Compositae	leaves	1	Decoction, paste	Shrub	0	0	0	0	0	0	0	0	1	0	0	0	0	0	0	0	0	0	0	0	0	0	0	0	0	0	0	0	0
Kargha	Gilgit	35.915251°	74.257648°	Hampa	Artemisia sieversiana Ehrh.	Compositae	leaves	1	Paste	Shrub	0	0	0	0	0	0	0	0	1	0	0	0	0	0	0	0	0	0	0	0	0	0	0	0	0	0	0	0	0
Kargha	Gilgit	35.915251°	74.257648°	Hampa	Artemisia sieversiana Ehrh.	Compositae	leaves	1	Paste	Shrub	0	0	0	0	0	0	0	0	1	0	0	0	0	0	0	0	0	0	0	0	0	0	0	0	0	0	0	0	0
Kargha	Gilgit	35.915251°	74.257648°	Hampa	Artemisia sieversiana Ehrh.	Compositae	leaves	1	Paste	Shrub	0	0	0	0	0	0	0	0	1	0	0	0	0	0	0	0	0	0	0	0	0	0	0	0	0	0	0	0	0
Kargha	Gilgit	35.915251°	74.257648°	Hampa	Artemisia sieversiana Ehrh.	Compositae	leaves	1	Paste	Shrub	0	0	0	0	0	0	0	0	1	0	0	0	0	0	0	0	0	0	0	0	0	0	0	0	0	0	0	0	0
Kargha	Gilgit	35.915251°	74.257648°	Hampa	Artemisia sieversiana Ehrh.	Compositae	leaves	1	Paste	Shrub	0	0	0	0	0	0	0	0	1	0	0	0	0	0	0	0	0	0	0	0	0	0	0	0	0	0	0	0	0
Rahimabad	Gilgit	36.118837°	74.297376°	Hampa	Artemisia sieversiana Ehrh.	Compositae	leaves	1	Paste	Shrub	0	0	0	0	0	0	0	0	1	0	0	0	0	0	0	0	0	0	0	0	0	0	0	0	0	0	0	0	0
Rahimabad	Gilgit	36.118837°	74.297376°	Hampa	Artemisia sieversiana Ehrh.	Compositae	leaves	1	Paste	Shrub	0	0	0	0	0	0	0	0	1	0	0	0	0	0	0	0	0	0	0	0	0	0	0	0	0	0	0	0	0
Nagar Khas	Nagar	36.276377°	74.719955°	Hampa	Artemisia sieversiana Ehrh.	Compositae	leaves	1	Paste	Shrub	0	0	0	0	0	0	0	0	1	0	0	0	0	0	0	0	0	0	0	0	0	0	0	0	0	0	0	0	0
Nagar Khas	Nagar	36.276377°	74.719955°	Hampa	Artemisia sieversiana Ehrh.	Compositae	leaves	1	Paste	Shrub	0	0	0	0	0	0	0	0	1	0	0	0	0	0	0	0	0	0	0	0	0	0	0	0	0	0	0	0	0
Nagar Khas	Nagar	36.276377°	74.719955°	Hampa	Artemisia sieversiana Ehrh.	Compositae	leaves	1	Paste	Shrub	0	0	0	0	0	0	0	0	1	0	0	0	0	0	0	0	0	0	0	0	0	0	0	0	0	0	0	0	0
Nagar Khas	Nagar	36.276377°	74.719955°	Hampa	Artemisia sieversiana Ehrh.	Compositae	leaves	1	Paste	Shrub	0	0	0	0	0	0	0	0	1	0	0	0	0	0	0	0	0	0	0	0	0	0	0	0	0	0	0	0	0
Hashupi	Skardu	35.485929°	75.696578°	Khampa	Artemisia sieversiana Ehrh.	Compositae	flower, leaves, root	2	Decoction, paste	Shrub	0	1	1	0	0	0	0	0	0	0	0	0	0	0	0	0	0	0	0	0	0	0	0	0	0	0	0	0	0
Hashupi	Skardu	35.485929°	75.696578°	Khampa	Artemisia sieversiana Ehrh.	Compositae	flower, leaves, root	2	Infusion, decoction, paste	Shrub	0	1	0	0	0	0	0	0	1	0	0	0	0	0	0	0	0	0	0	0	0	0	0	0	0	0	0	0	0
Hashupi	Skardu	35.485929°	75.696578°	Khampa	Artemisia sieversiana Ehrh.	Compositae	flower, leaves, root	1	Decoction, paste	Shrub	0	0	0	0	0	0	0	0	1	0	0	0	0	0	0	0	0	0	0	0	0	0	0	0	0	0	0	0	0
Hashupi	Skardu	35.485929°	75.696578°	Khampa	Artemisia sieversiana Ehrh.	Compositae	flower, leaves, root	2	Decoction, paste	Shrub	0	0	1	0	0	0	0	0	1	0	0	0	0	0	0	0	0	0	0	0	0	0	0	0	0	0	0	0	0
Hashupi	Skardu	35.485929°	75.696578°	Khampa	Artemisia sieversiana Ehrh.	Compositae	flower, leaves, root	1	Decoction, paste	Shrub	0	0	1	0	0	0	0	0	0	0	0	0	0	0	0	0	0	0	0	0	0	0	0	0	0	0	0	0	0
Thowar	Skardu	35.609167°	75.203611°	Khampa	Artemisia sieversiana Ehrh.	Compositae	flower, leaves, root	3	Infusion, decoction, paste	Shrub	0	1	1	0	0	0	0	0	1	0	0	0	0	0	0	0	0	0	0	0	0	0	0	0	0	0	0	0	0
Gahkuch	Ghizer	36.162949°	73.755492°	Hapocho	Astragalus falconeri Bunge	Leguminosae	stem, leaves	2	Powder/grinded	Herb	0	0	0	0	0	0	0	2	0	0	0	0	0	0	0	0	0	0	0	0	0	0	0	0	0	0	0	0	0
Gahkuch	Ghizer	36.162949°	73.755492°	Hapocho	Astragalus falconeri Bunge	Leguminosae	stem, leaves	2	Powder/grinded	Herb	0	0	0	0	0	0	0	2	0	0	0	0	0	0	0	0	0	0	0	0	0	0	0	0	0	0	0	0	0
Gahkuch	Ghizer	36.162949°	73.755492°	Hapocho	Astragalus falconeri Bunge	Leguminosae	stem, leaves	1	Powder/grinded	Herb	0	0	0	0	0	0	0	1	0	0	0	0	0	0	0	0	0	0	0	0	0	0	0	0	0	0	0	0	0
Gahkuch	Ghizer	36.162949°	73.755492°	Hapocho	Astragalus falconeri Bunge	Leguminosae	stem, leaves	2	Powder/grinded	Herb	0	0	0	0	0	0	0	2	0	0	0	0	0	0	0	0	0	0	0	0	0	0	0	0	0	0	0	0	0
Yaseen	Ghizer	36.369354°	73.332552°	Hapocho	Astragalus falconeri Bunge	Leguminosae	stem, leaves	2	Powder/grinded	Herb	0	0	0	0	0	0	0	2	0	0	0	0	0	0	0	0	0	0	0	0	0	0	0	0	0	0	0	0	0
Yaseen	Ghizer	36.369354°	73.332552°	Hapocho	Astragalus falconeri Bunge	Leguminosae	stem, leaves	1	Powder/grinded	Herb	0	0	0	0	0	0	0	1	0	0	0	0	0	0	0	0	0	0	0	0	0	0	0	0	0	0	0	0	0
Yaseen	Ghizer	36.369354°	73.332552°	Hapocho	Astragalus falconeri Bunge	Leguminosae	stem, leaves	2	Powder/grinded	Herb	0	0	0	0	0	0	0	2	0	0	0	0	0	0	0	0	0	0	0	0	0	0	0	0	0	0	0	0	0
Eidgah	Astore	35.347049°	74.857882°	Shashal	Astragalus frigidus (L.) A.Gray	Leguminosae	stem, leaves	3	Powder/grinded	Herb	0	0	0	0	0	0	0	1	0	0	0	0	0	0	0	0	1	0	0	0	0	0	1	0	0	0	0	0	0
Eidgah	Astore	35.347049°	74.857882°	Shashal	Astragalus frigidus (L.) A.Gray	Leguminosae	stem, leaves	2	Powder/grinded	Herb	0	0	0	0	0	0	0	1	0	0	0	0	0	0	0	0	0	0	0	0	0	0	1	0	0	0	0	0	0
Eidgah	Astore	35.347049°	74.857882°	Shashal	Astragalus frigidus (L.) A.Gray	Leguminosae	stem, leaves	3	Powder/grinded	Herb	0	0	0	0	0	0	0	1	0	0	0	0	0	0	0	0	1	0	0	0	0	0	1	0	0	0	0	0	0
Jaglot	Astore	35.685000°	74.623889°	Shashal	Astragalus frigidus (L.) A.Gray	Leguminosae	stem, leaves	2	Powder/grinded	Herb	0	0	0	0	0	0	0	0	0	0	0	0	0	0	0	0	1	0	0	0	0	0	1	0	0	0	0	0	0
Rattu	Astore	35.168461°	74.791752°1	Shashal	Astragalus frigidus (L.) A.Gray	Leguminosae	stem, leaves	2	Powder/grinded	Herb	0	0	0	0	0	0	0	1	0	0	0	0	0	0	0	0	0	0	0	0	0	0	1	0	0	0	0	0	0
Rattu	Astore	35.168461°	74.791752°1	Shashal	Astragalus frigidus (L.) A.Gray	Leguminosae	stem, leaves	3	Powder/grinded	Herb	0	0	0	0	0	0	0	1	0	0	0	0	0	0	0	0	1	0	0	0	0	0	1	0	0	0	0	0	0
Rattu	Astore	35.168461°	74.791752°1	Shashal	Astragalus frigidus (L.) A.Gray	Leguminosae	stem, leaves	2	Powder/grinded	Herb	0	0	0	0	0	0	0	0	0	0	0	0	0	0	0	0	1	0	0	0	0	0	1	0	0	0	0	0	0
Kargha	Gilgit	35.915251°	74.257648°	BiowaCharchu	Astragalus psilocentros Fisch.	Leguminosae	stem, leaves	2	Decoction	Shrub	0	0	0	0	0	0	0	1	0	0	0	0	0	0	0	0	1	0	0	0	0	0	0	0	0	0	0	0	0
Kargha	Gilgit	35.915251°	74.257648°	BiowaCharchu	Astragalus psilocentros Fisch.	Leguminosae	stem, leaves	3	Decoction	Shrub	0	0	0	0	0	0	0	1	0	0	0	0	0	0	0	0	1	0	0	0	0	0	1	0	0	0	0	0	0
Kargha	Gilgit	35.915251°	74.257648°	BiowaCharchu	Astragalus psilocentros Fisch.	Leguminosae	stem, leaves	2	Decoction	Shrub	0	0	0	0	0	0	0	1	0	0	0	0	0	0	0	0	0	0	0	0	0	0	1	0	0	0	0	0	0
Kargha	Gilgit	35.915251°	74.257648°	BiowaCharchu	Astragalus psilocentros Fisch.	Leguminosae	stem, leaves	3	Decoction	Shrub	0	0	0	0	0	0	0	1	0	0	0	0	0	0	0	0	1	0	0	0	0	0	1	0	0	0	0	0	0
Kargha	Gilgit	35.915251°	74.257648°	BiowaCharchu	Astragalus psilocentros Fisch.	Leguminosae	stem, leaves	2	Decoction	Shrub	0	0	0	0	0	0	0	1	0	0	0	0	0	0	0	0	0	0	0	0	0	0	1	0	0	0	0	0	0
Rahimabad	Gilgit	36.118837°	74.297376°	BiowaCharchu	Astragalus psilocentros Fisch.	Leguminosae	stem, leaves	2	Decoction	Shrub	0	0	0	0	0	0	0	1	0	0	0	0	0	0	0	0	1	0	0	0	0	0	0	0	0	0	0	0	0
Rahimabad	Gilgit	36.118837°	74.297376°	BiowaCharchu	Astragalus psilocentros Fisch.	Leguminosae	stem, leaves	1	Decoction	Shrub	0	0	0	0	0	0	0	1	0	0	0	0	0	0	0	0	0	0	0	0	0	0	0	0	0	0	0	0	0
Altit	Hunza	36.316102°	74.681835°	Hapoocho	Astragalus psilocentros Fisch.	Leguminosae	stem, leaves	2	Decoction	Shrub	0	0	0	0	0	0	0	1	0	0	0	0	0	0	0	0	0	0	0	0	0	0	1	0	0	0	0	0	0
Altit	Hunza	36.316102°	74.681835°	Hapoocho	Astragalus psilocentros Fisch.	Leguminosae	stem, leaves	2	Decoction	Shrub	0	0	0	0	0	0	0	1	0	0	0	0	0	0	0	0	0	0	0	0	0	0	1	0	0	0	0	0	0
Altit	Hunza	36.316102°	74.681835°	Hapoocho	Astragalus psilocentros Fisch.	Leguminosae	stem, leaves	2	Decoction	Shrub	0	0	0	0	0	0	0	1	0	0	0	0	0	0	0	0	0	0	0	0	0	0	1	0	0	0	0	0	0
Karimabad	Hunza	36.326408°	74.664316°	Hapoocho	Astragalus psilocentros Fisch.	Leguminosae	stem, leaves	2	Decoction	Shrub	0	0	0	0	0	0	0	1	0	0	0	0	0	0	0	0	0	0	0	0	0	0	1	0	0	0	0	0	0
Karimabad	Hunza	36.326408°	74.664316°	Hapoocho	Astragalus psilocentros Fisch.	Leguminosae	stem, leaves	2	Decoction	Shrub	0	0	0	0	0	0	0	1	0	0	0	0	0	0	0	0	0	0	0	0	0	0	1	0	0	0	0	0	0
Karimabad	Hunza	36.326408°	74.664316°	Hapoocho	Astragalus psilocentros Fisch.	Leguminosae	stem, leaves	2	Decoction	Shrub	0	0	0	0	0	0	0	1	0	0	0	0	0	0	0	0	0	0	0	0	0	0	1	0	0	0	0	0	0
Murtazaabad	Hunza	36.285517°	74.607833°	Hapoocho	Astragalus psilocentros Fisch.	Leguminosae	stem, leaves	2	Decoction	Shrub	0	0	0	0	0	0	0	1	0	0	0	0	0	0	0	0	0	0	0	0	0	0	1	0	0	0	0	0	0
Basho	Skardu	35.469494°	75.359156°	Biacharchoo	Astragalus psilocentros Fisch.	Leguminosae	Root, thorny branches	3	Decoction, infusion	Shrub	0	0	0	0	0	0	0	1	0	0	0	0	0	0	0	0	1	0	0	0	0	0	1	0	0	0	0	0	0
Basho	Skardu	35.469494°	75.359156°	Sokhrus	Astragalus psilocentros Fisch.	Leguminosae	Root, leaves	2	Decoction, infusion	Shrub	0	0	0	0	0	0	0	1	0	0	1	0	0	0	0	0	0	0	0	0	0	0	0	0	0	0	0	0	0
Basho	Skardu	35.469494°	75.359156°	Biacharchoo	Astragalus psilocentros Fisch.	Leguminosae	Root, thorny branches	2	Decoction, infusion	Shrub	0	0	0	0	0	0	0	0	0	0	0	0	0	0	0	0	1	0	0	0	0	0	1	0	0	0	0	0	0
Basho	Skardu	35.469494°	75.359156°	Biacharchoo	Astragalus psilocentros Fisch.	Leguminosae	Root, thorny branches	3	Decoction, infusion	Shrub	0	0	0	0	0	0	0	0	0	0	1	0	0	0	0	0	1	0	0	0	0	0	1	0	0	0	0	0	0
Hashupi	Skardu	35.485929°	75.696578°	Sokhrus	Astragalus psilocentros Fisch.	Leguminosae	Root, leaves	4	Decoction, infusion	Shrub	0	0	0	0	0	0	0	1	0	0	1	0	0	0	0	0	1	0	0	0	0	0	1	0	0	0	0	0	0
Hashupi	Skardu	35.485929°	75.696578°	Sokhrus	Astragalus psilocentros Fisch.	Leguminosae	Root, leaves	2	Decoction, infusion	Shrub	0	0	0	0	0	0	0	1	0	0	1	0	0	0	0	0	0	0	0	0	0	0	0	0	0	0	0	0	0
Hashupi	Skardu	35.485929°	75.696578°	Sokhrus	Astragalus psilocentros Fisch.	Leguminosae	Root, leaves	3	Decoction, infusion	Shrub	0	0	0	0	0	0	0	1	0	0	1	0	0	0	0	0	0	0	0	0	0	0	1	0	0	0	0	0	0
Hashupi	Skardu	35.485929°	75.696578°	Biacharchoo	Astragalus psilocentros Fisch.	Leguminosae	Root, thorny branches	3	Decoction, infusion	Shrub	0	0	0	0	0	0	0	0	0	0	1	0	0	0	0	0	1	0	0	0	0	0	1	0	0	0	0	0	0
Hashupi	Skardu	35.485929°	75.696578°	Sokhrus	Astragalus psilocentros Fisch.	Leguminosae	Root, leaves	3	Decoction, infusion	Shrub	0	0	0	0	0	0	0	1	0	0	1	0	0	0	0	0	1	0	0	0	0	0	0	0	0	0	0	0	0
Hosho	Skardu	35.345214°	75.515283°	Biacharchoo	Astragalus psilocentros Fisch.	Leguminosae	Root, thorny branches	4	Decoction, infusion	Shrub	0	0	0	0	0	0	0	1	0	0	1	0	0	0	0	0	1	0	0	0	0	0	1	0	0	0	0	0	0
Thowar	Skardu	35.609167°	75.203611°	Sokhrus	Astragalus psilocentros Fisch.	Leguminosae	Root, leaves	2	Decoction, infusion	Shrub	0	0	0	0	0	0	0	1	0	0	1	0	0	0	0	0	0	0	0	0	0	0	0	0	0	0	0	0	0
Thowar	Skardu	35.609167°	75.203611°	Biacharchoo	Astragalus psilocentros Fisch.	Leguminosae	Root, thorny branches	3	Decoction, infusion	Shrub	0	0	0	0	0	0	0	1	0	0	0	0	0	0	0	0	1	0	0	0	0	0	1	0	0	0	0	0	0
Ghulkin	Hunza	36.407318°	74.863984°	Zhop/Thope	Astragalus strictus Benth.	Leguminosae	leaves, flower	1	Direct	Herb	0	0	0	0	0	0	0	0	0	0	0	0	0	0	0	0	0	0	0	0	0	0	0	0	0	1	0	0	0
Ghulkin	Hunza	36.407318°	74.863984°	Zhop/Thope	Astragalus strictus Benth.	Leguminosae	leaves, flower	1	Direct	Herb	0	0	0	0	0	0	0	0	0	0	0	0	0	0	0	0	0	0	0	0	0	0	0	0	0	1	0	0	0
Ghulkin	Hunza	36.407318°	74.863984°	Zhop/Thope	Astragalus strictus Benth.	Leguminosae	leaves, flower	1	Direct	Herb	0	0	0	0	0	0	0	0	0	0	0	0	0	0	0	0	0	0	0	0	0	0	0	0	0	1	0	0	0
Ghulkin	Hunza	36.407318°	74.863984°	Zhop/Thope	Astragalus strictus Benth.	Leguminosae	leaves, flower	1	Direct	Herb	0	0	0	0	0	0	0	0	0	0	0	0	0	0	0	0	0	0	0	0	0	0	0	0	0	1	0	0	0
Shimshal	Hunza	36.436464°	75.313109°	Zhop/Thope	Astragalus strictus Benth.	Leguminosae	leaves, flower	1	Direct	Herb	0	0	0	0	0	0	0	0	0	0	0	0	0	0	0	0	0	0	0	0	0	0	0	0	0	1	0	0	0
Shimshal	Hunza	36.436464°	75.313109°	Zhop/Thope	Astragalus strictus Benth.	Leguminosae	leaves, flower	1	Direct	Herb	0	0	0	0	0	0	0	0	0	0	0	0	0	0	0	0	0	0	0	0	0	0	0	0	0	1	0	0	0
Shimshal	Hunza	36.436464°	75.313109°	Zhop/Thope	Astragalus strictus Benth.	Leguminosae	leaves, flower	1	Direct	Herb	0	0	0	0	0	0	0	0	0	0	0	0	0	0	0	0	0	0	0	0	0	0	0	0	0	1	0	0	0
Basho	Skardu	35.469494°	75.359156°	Shukpa	Astragalus zanskarensis Bunge	Leguminosae	stem, leaves	1	Paste, ash	Herb	1	0	0	0	0	0	0	0	0	0	0	0	0	0	0	0	0	0	0	0	0	0	0	0	0	0	0	0	0
Basho	Skardu	35.469494°	75.359156°	Shukpa	Astragalus zanskarensis Bunge	Leguminosae	stem, leaves	2	Paste, ash	Herb	1	0	0	0	0	0	0	0	0	0	0	0	0	0	0	0	0	0	0	0	1	0	0	0	0	0	0	0	0
Basho	Skardu	35.469494°	75.359156°	Shukpa	Astragalus zanskarensis Bunge	Leguminosae	stem, leaves	2	Paste, ash	Herb	1	0	0	0	0	0	0	0	0	0	0	0	0	0	0	0	0	0	0	0	1	0	0	0	0	0	0	0	0
Hashupi	Skardu	35.485929°	75.696578°	Shukpa	Astragalus zanskarensis Bunge	Leguminosae	stem, leaves	1	Paste, ash	Herb	1	0	0	0	0	0	0	0	0	0	0	0	0	0	0	0	0	0	0	0	0	0	0	0	0	0	0	0	0
Hosho	Skardu	35.345214°	75.515283°	Shukpa	Astragalus zanskarensis Bunge	Leguminosae	stem, leaves	1	Paste, ash	Herb	1	0	0	0	0	0	0	0	0	0	0	0	0	0	0	0	0	0	0	0	0	0	0	0	0	0	0	0	0
Thowar	Skardu	35.609167°	75.203611°	Shukpa	Astragalus zanskarensis Bunge	Leguminosae	stem, leaves	1	Paste, ash	Herb	0	0	0	0	0	0	0	0	0	0	0	0	0	0	0	0	0	0	0	0	1	0	0	0	0	0	0	0	0
Aliabad	Hunza	36.308563°	74.619496°	Shasher	Avena sativa L.	Poaceae	seed, leaves	3	decoction	Grass	0	0	0	0	0	0	0	0	2	0	0	0	0	0	0	1	0	0	0	0	0	0	0	0	0	0	0	0	0
Aliabad	Hunza	36.308563°	74.619496°	Shasher	Avena sativa L.	Poaceae	seed, leaves	3	decoction	Grass	0	0	0	0	0	0	0	0	2	0	0	0	0	0	0	1	0	0	0	0	0	0	0	0	0	0	0	0	0
Aliabad	Hunza	36.308563°	74.619496°	Shasher	Avena sativa L.	Poaceae	seed, leaves	2	decoction	Grass	0	0	0	0	0	0	0	0	2	0	0	0	0	0	0	0	0	0	0	0	0	0	0	0	0	0	0	0	0
Aliabad	Hunza	36.308563°	74.619496°	Shasher	Avena sativa L.	Poaceae	seed, leaves	3	decoction	Grass	0	0	0	0	0	0	0	0	2	0	0	0	0	0	0	1	0	0	0	0	0	0	0	0	0	0	0	0	0
Aliabad	Hunza	36.308563°	74.619496°	Shasher	Avena sativa L.	Poaceae	seed, leaves	3	decoction	Grass	0	0	0	0	0	0	0	0	2	0	0	0	0	0	0	1	0	0	0	0	0	0	0	0	0	0	0	0	0
Aliabad	Hunza	36.308563°	74.619496°	Shasher	Avena sativa L.	Poaceae	seed, leaves	3	decoction	Grass	0	0	0	0	0	0	0	0	2	0	0	0	0	0	0	1	0	0	0	0	0	0	0	0	0	0	0	0	0
Altit	Hunza	36.316102°	74.681835°	Shasher	Avena sativa L.	Poaceae	seed, leaves	1	decoction	Grass	0	0	0	0	0	0	0	0	0	0	0	0	0	0	0	1	0	0	0	0	0	0	0	0	0	0	0	0	0
Altit	Hunza	36.316102°	74.681835°	Shasher	Avena sativa L.	Poaceae	seed, leaves	3	decoction	Grass	0	0	0	0	0	0	0	0	2	0	0	0	0	0	0	1	0	0	0	0	0	0	0	0	0	0	0	0	0
Altit	Hunza	36.316102°	74.681835°	Shasher	Avena sativa L.	Poaceae	seed, leaves	1	decoction	Grass	0	0	0	0	0	0	0	0	0	0	0	0	0	0	0	1	0	0	0	0	0	0	0	0	0	0	0	0	0
Karimabad	Hunza	36.326408°	74.664316°	Shasher	Avena sativa L.	Poaceae	seed, leaves	1	decoction	Grass	0	0	0	0	0	0	0	0	0	0	0	0	0	0	0	1	0	0	0	0	0	0	0	0	0	0	0	0	0
Murtazaabad	Hunza	36.285517°	74.607833°	Shasher	Avena sativa L.	Poaceae	seed, leaves	3	decoction	Grass	0	0	0	0	0	0	0	0	2	0	0	0	0	0	0	1	0	0	0	0	0	0	0	0	0	0	0	0	0
Murtazaabad	Hunza	36.285517°	74.607833°	Shasher	Avena sativa L.	Poaceae	seed, leaves	3	decoction	Grass	0	0	0	0	0	0	0	0	2	0	0	0	0	0	0	1	0	0	0	0	0	0	0	0	0	0	0	0	0
Murtazaabad	Hunza	36.285517°	74.607833°	Shasher	Avena sativa L.	Poaceae	seed, leaves	2	decoction	Grass	0	0	0	0	0	0	0	0	2	0	0	0	0	0	0	0	0	0	0	0	0	0	0	0	0	0	0	0	0
Murtazaabad	Hunza	36.285517°	74.607833°	Shasher	Avena sativa L.	Poaceae	seed, leaves	3	decoction	Grass	0	0	0	0	0	0	0	0	2	0	0	0	0	0	0	1	0	0	0	0	0	0	0	0	0	0	0	0	0
Basho	Skardu	35.469494°	75.359156°	Nas Choo	Avena sativa L.	Poaceae	seed	2	decoction	Grass	0	0	0	0	0	0	0	0	2	0	0	0	0	0	0	0	0	0	0	0	0	0	0	0	0	0	0	0	0
Hashupi	Skardu	35.485929°	75.696578°	Nas Choo	Avena sativa L.	Poaceae	seed	2	decoction	Grass	0	0	0	0	0	0	0	0	1	0	0	0	0	0	0	1	0	0	0	0	0	0	0	0	0	0	0	0	0
Hashupi	Skardu	35.485929°	75.696578°	Nas Choo	Avena sativa L.	Poaceae	seed	2	decoction	Grass	0	0	0	0	0	0	0	0	1	0	0	0	0	0	0	1	0	0	0	0	0	0	0	0	0	0	0	0	0
Hashupi	Skardu	35.485929°	75.696578°	Nas Choo	Avena sativa L.	Poaceae	seed	2	decoction	Grass	0	0	0	0	0	0	0	0	1	0	0	0	0	0	0	1	0	0	0	0	0	0	0	0	0	0	0	0	0
Hashupi	Skardu	35.485929°	75.696578°	Nas Choo	Avena sativa L.	Poaceae	seed	3	decoction	Grass	0	0	0	0	0	0	0	0	1	0	0	0	0	0	0	1	1	0	0	0	0	0	0	0	0	0	0	0	0
Thowar	Skardu	35.609167°	75.203611°	Nas Choo	Avena sativa L.	Poaceae	seed	2	decoction	Grass	0	0	0	0	0	0	0	0	2	0	0	0	0	0	0	0	0	0	0	0	0	0	0	0	0	0	0	0	0
Bilchar/Bagrote	Gilgit	35.942517°	74.545274°	Ishkeen	Berberis brandisiana Ahrendt	Berberidaceae	root, stem, bark	11	decoction	Shrub	3	1	0	2	0	0	0	0	0	1	0	0	0	0	0	1	1	0	0	0	0	1	0	0	0	0	0	1	0
Bilchar/Bagrote	Gilgit	35.942517°	74.545274°	Ishkeen	Berberis brandisiana Ahrendt	Berberidaceae	root, stem, bark	9	decoction	Shrub	2	1	0	2	0	0	0	0	0	1	0	0	0	0	0	1	1	0	0	0	0	1	0	0	0	0	0	0	0
Bilchar/Bagrote	Gilgit	35.942517°	74.545274°	Ishkeen	Berberis brandisiana Ahrendt	Berberidaceae	root, stem, bark	12	decoction	Shrub	3	1	0	2	0	0	0	0	0	1	0	0	0	1	0	1	1	0	0	0	0	1	0	0	0	0	0	1	0
Bilchar/Bagrote	Gilgit	35.942517°	74.545274°	Ishkeen	Berberis brandisiana Ahrendt	Berberidaceae	root, stem, bark	13	decoction	Shrub	3	1	0	2	0	0	0	0	0	1	0	0	0	1	0	1	1	1	0	0	0	1	0	0	0	0	0	1	0
Bilchar/Bagrote	Gilgit	35.942517°	74.545274°	Ishkeen	Berberis brandisiana Ahrendt	Berberidaceae	root, stem, bark	13	decoction	Shrub	3	1	0	2	0	0	0	0	0	1	0	0	0	1	0	1	1	1	0	0	0	1	0	0	0	0	0	1	0
Danyore	Gilgit	35.919880°	74.386181°	Ishkeen	Berberis brandisiana Ahrendt	Berberidaceae	root, stem, bark	12	decoction	Shrub	3	1	0	2	0	0	0	0	0	1	0	0	0	1	0	1	1	0	0	0	0	1	0	0	0	0	0	1	0
Danyore	Gilgit	35.919880°	74.386181°	Ishkeen	Berberis brandisiana Ahrendt	Berberidaceae	root, stem, bark	5	decoction	Shrub	3	1	0	0	0	0	0	0	0	0	0	0	0	0	0	0	0	0	0	0	0	1	0	0	0	0	0	0	0
Danyore	Gilgit	35.919880°	74.386181°	Ishkeen	Berberis brandisiana Ahrendt	Berberidaceae	root, stem, bark	13	decoction	Shrub	3	1	0	2	0	0	0	0	0	1	0	0	0	1	0	1	1	1	0	0	0	1	0	0	0	0	0	1	0
Danyore	Gilgit	35.919880°	74.386181°	Ishkeen	Berberis brandisiana Ahrendt	Berberidaceae	root, stem, bark	13	decoction	Shrub	3	1	0	2	0	0	0	0	0	1	0	0	0	1	0	1	1	1	0	0	0	1	0	0	0	0	0	1	0
Jalalabad	Gilgit	35.880457°	74.493590°	Ishkeen	Berberis brandisiana Ahrendt	Berberidaceae	root, stem, bark	5	decoction	Shrub	2	1	0	1	0	0	0	0	0	0	0	0	0	0	0	0	1	0	0	0	0	0	0	0	0	0	0	0	0
Jalalabad	Gilgit	35.880457°	74.493590°	Ishkeen	Berberis brandisiana Ahrendt	Berberidaceae	root, stem, bark	12	decoction	Shrub	3	1	0	2	0	0	0	0	0	1	0	0	0	1	0	1	1	0	0	0	0	1	0	0	0	0	0	1	0
Jalalabad	Gilgit	35.880457°	74.493590°	Ishkeen	Berberis brandisiana Ahrendt	Berberidaceae	root, stem, bark	13	decoction	Shrub	3	1	0	2	0	0	0	0	0	1	0	0	0	1	0	1	1	1	0	0	0	1	0	0	0	0	0	1	0
Jalalabad	Gilgit	35.880457°	74.493590°	Ishkeen	Berberis brandisiana Ahrendt	Berberidaceae	root, stem, bark	13	decoction	Shrub	3	1	0	2	0	0	0	0	0	1	0	0	0	1	0	1	1	1	0	0	0	1	0	0	0	0	0	1	0
Jalalabad	Gilgit	35.880457°	74.493590°	Ishkeen	Berberis brandisiana Ahrendt	Berberidaceae	root, stem, bark	13	decoction	Shrub	3	1	0	2	0	0	0	0	0	1	0	0	0	1	0	1	1	1	0	0	0	1	0	0	0	0	0	1	0
Kargha	Gilgit	35.915251°	74.257648°	Ishkein	Berberis brandisiana Ahrendt	Berberidaceae	root, stem, bark	12	decoction	Shrub	3	1	0	2	0	0	0	0	0	1	0	0	0	1	0	1	1	0	0	0	0	1	0	0	0	0	0	1	0
Kargha	Gilgit	35.915251°	74.257648°	Ishkein	Berberis brandisiana Ahrendt	Berberidaceae	root, stem, bark	6	decoction	Shrub	3	0	0	0	0	0	0	0	0	0	0	0	0	1	0	1	0	0	0	0	0	0	0	0	0	0	0	1	0
Kargha	Gilgit	35.915251°	74.257648°	Ishkein	Berberis brandisiana Ahrendt	Berberidaceae	root, stem, bark	7	decoction	Shrub	2	1	0	1	0	0	0	0	0	1	0	0	0	1	0	0	0	0	0	0	0	1	0	0	0	0	0	0	0
Kargha	Gilgit	35.915251°	74.257648°	Ishkein	Berberis brandisiana Ahrendt	Berberidaceae	root, stem, bark	5	decoction	Shrub	1	1	0	0	0	0	0	0	0	1	0	0	0	1	0	1	0	0	0	0	0	0	0	0	0	0	0	0	0
Rahimabad	Gilgit	36.118837°	74.297376°	Ishkein	Berberis brandisiana Ahrendt	Berberidaceae	root, stem, bark	11	decoction	Shrub	3	0	0	2	0	0	0	0	0	1	0	0	0	1	0	1	1	0	0	0	0	1	0	0	0	0	0	1	0
Rahimabad	Gilgit	36.118837°	74.297376°	Ishkein	Berberis brandisiana Ahrendt	Berberidaceae	root, stem, bark	7	decoction	Shrub	3	0	0	2	0	0	0	0	0	0	0	0	0	0	0	0	1	0	0	0	0	0	0	0	0	0	0	1	0
Rahimabad	Gilgit	36.118837°	74.297376°	Ishkein	Berberis brandisiana Ahrendt	Berberidaceae	root, stem, bark	6	decoction	Shrub	1	1	0	2	0	0	0	0	0	0	0	0	0	0	0	0	1	0	0	0	0	1	0	0	0	0	0	0	0
Ghulmit	Nagar	36.241766°	74.462110°	Ishkenachi	Berberis brandisiana Ahrendt	Berberidaceae	root, stem, bark	9	decoction	Shrub	2	1	0	2	0	0	0	0	0	0	0	0	0	1	0	1	0	0	0	0	0	1	0	0	0	0	0	1	0
Ghulmit	Nagar	36.241766°	74.462110°	Ishkenachi	Berberis brandisiana Ahrendt	Berberidaceae	root, stem, bark	8	decoction	Shrub	3	1	0	2	0	0	0	0	0	1	0	0	0	1	0	0	0	0	0	0	0	0	0	0	0	0	0	0	0
Ghulmit	Nagar	36.241766°	74.462110°	Ishkenachi	Berberis brandisiana Ahrendt	Berberidaceae	root, stem, bark	5	decoction	Shrub	1	1	0	2	0	0	0	0	0	0	0	0	0	1	0	0	0	0	0	0	0	0	0	0	0	0	0	0	0
Ghulmit	Nagar	36.241766°	74.462110°	Ishkeen	Berberis brandisiana Ahrendt	Berberidaceae	root, stem, bark	8	decoction	Shrub	2	1	0	1	0	0	0	0	0	1	0	0	0	0	0	1	1	0	0	0	0	1	0	0	0	0	0	0	0
Ghulmit	Nagar	36.241766°	74.462110°	Ishkeen	Berberis brandisiana Ahrendt	Berberidaceae	root, stem, bark	6	decoction	Shrub	1	1	0	1	0	0	0	0	0	1	0	0	0	1	0	0	0	0	0	0	0	1	0	0	0	0	0	0	0
Ghulmit	Nagar	36.241766°	74.462110°	Ishkeen	Berberis brandisiana Ahrendt	Berberidaceae	root, stem, bark	8	decoction	Shrub	2	1	0	1	0	0	0	0	0	1	0	0	0	0	0	1	1	0	0	0	0	1	0	0	0	0	0	0	0
Ghulmit	Nagar	36.241766°	74.462110°	Ishkeen	Berberis brandisiana Ahrendt	Berberidaceae	root, stem, bark	7	decoction	Shrub	1	1	0	2	0	0	0	0	0	1	0	0	0	0	0	0	1	0	0	0	0	1	0	0	0	0	0	0	0
Ghulmit	Nagar	36.241766°	74.462110°	Ishkeen	Berberis brandisiana Ahrendt	Berberidaceae	root, stem, bark	6	decoction	Shrub	2	1	0	1	0	0	0	0	0	0	0	0	0	0	0	1	0	0	0	0	0	1	0	0	0	0	0	0	0
Ghulmit	Nagar	36.241766°	74.462110°	Ishkeen	Berberis brandisiana Ahrendt	Berberidaceae	root, stem, bark	9	decoction	Shrub	2	1	0	2	0	0	0	0	0	0	0	0	0	0	0	1	1	1	0	0	0	1	0	0	0	0	0	0	0
Minapin	Nagar	36.250922°	74.536075°	Ishkenachi	Berberis brandisiana Ahrendt	Berberidaceae	root, stem, bark	9	decoction	Shrub	3	0	0	0	0	0	0	0	0	1	0	0	0	1	0	1	1	0	0	0	0	1	0	0	0	0	0	1	0
Minapin	Nagar	36.250922°	74.536075°	Ishkenachi	Berberis brandisiana Ahrendt	Berberidaceae	root, stem, bark	8	decoction	Shrub	2	1	0	2	0	0	0	0	0	0	0	0	0	0	0	0	1	0	0	0	0	1	0	0	0	0	0	1	0
Minapin	Nagar	36.250922°	74.536075°	Ishkeen	Berberis brandisiana Ahrendt	Berberidaceae	root, stem, bark	10	decoction	Shrub	2	1	0	2	0	0	0	0	0	1	0	0	0	1	0	1	0	1	0	0	0	1	0	0	0	0	0	0	0
Minapin	Nagar	36.250922°	74.536075°	Ishkeen	Berberis brandisiana Ahrendt	Berberidaceae	root, stem, bark	11	decoction	Shrub	3	1	0	1	0	0	0	0	0	1	0	0	0	1	0	1	0	1	0	0	0	1	0	0	0	0	0	1	0
Minapin	Nagar	36.250922°	74.536075°	Ishkeen	Berberis brandisiana Ahrendt	Berberidaceae	root, stem, bark	9	decoction	Shrub	3	1	0	0	0	0	0	0	0	1	0	0	0	0	0	0	1	1	0	0	0	1	0	0	0	0	0	1	0
Minapin	Nagar	36.250922°	74.536075°	Ishkeen	Berberis brandisiana Ahrendt	Berberidaceae	root, stem, bark	8	decoction	Shrub	1	1	0	1	0	0	0	0	0	1	0	0	0	0	0	1	1	1	0	0	0	1	0	0	0	0	0	0	0
Minapin	Nagar	36.250922°	74.536075°	Ishkeen	Berberis brandisiana Ahrendt	Berberidaceae	root, stem, bark	9	decoction	Shrub	2	1	0	2	0	0	0	0	0	0	0	0	0	1	0	1	1	0	0	0	0	1	0	0	0	0	0	0	0
Minapin	Nagar	36.250922°	74.536075°	Ishkeen	Berberis brandisiana Ahrendt	Berberidaceae	root, stem, bark	7	decoction	Shrub	3	1	0	1	0	0	0	0	0	0	0	0	0	0	0	0	1	0	0	0	0	1	0	0	0	0	0	0	0
Nagar Khas	Nagar	36.276377°	74.719955°	Ishkeen	Berberis brandisiana Ahrendt	Berberidaceae	root, stem, bark	9	decoction	Shrub	3	0	0	2	0	0	0	0	0	1	0	0	0	1	0	0	1	0	0	0	0	1	0	0	0	0	0	0	0
Nagar Khas	Nagar	36.276377°	74.719955°	Ishkeen	Berberis brandisiana Ahrendt	Berberidaceae	root, stem, bark	8	decoction	Shrub	2	1	0	2	0	0	0	0	0	1	0	0	0	0	0	0	1	0	0	0	0	1	0	0	0	0	0	0	0
Nagar Khas	Nagar	36.276377°	74.719955°	Ishkeen	Berberis brandisiana Ahrendt	Berberidaceae	root, stem, bark	10	decoction	Shrub	3	1	0	1	0	0	0	0	0	1	0	0	0	0	0	1	1	0	0	0	0	1	0	0	0	0	0	1	0
Nagar Khas	Nagar	36.276377°	74.719955°	Ishkeen	Berberis brandisiana Ahrendt	Berberidaceae	root, stem, bark	9	decoction	Shrub	1	1	0	2	0	0	0	0	0	1	0	0	0	0	0	1	1	0	0	0	0	1	0	0	0	0	0	1	0
Nagar Khas	Nagar	36.276377°	74.719955°	Ishkeen	Berberis brandisiana Ahrendt	Berberidaceae	root, stem, bark	7	decoction	Shrub	3	1	0	0	0	0	0	0	0	0	0	0	0	1	0	0	0	1	0	0	0	1	0	0	0	0	0	0	0
Nagar Khas	Nagar	36.276377°	74.719955°	Ishkeen	Berberis brandisiana Ahrendt	Berberidaceae	root, stem, bark	9	decoction	Shrub	3	1	0	1	0	0	0	0	0	0	0	0	0	1	0	0	1	1	0	0	0	1	0	0	0	0	0	0	0
Phekar	Nagar	36.263297°	74.594568°	Ishkenachi	Berberis brandisiana Ahrendt	Berberidaceae	root, stem, bark	7	decoction	Shrub	2	0	0	0	0	0	0	0	0	1	0	0	0	1	0	1	1	0	0	0	0	1	0	0	0	0	0	0	0
Phekar	Nagar	36.263297°	74.594568°	Ishkenachi	Berberis brandisiana Ahrendt	Berberidaceae	root, stem, bark	6	decoction	Shrub	0	1	0	0	0	0	0	0	0	1	0	0	0	0	0	1	1	0	0	0	0	1	0	0	0	0	0	1	0
Phekar	Nagar	36.263297°	74.594568°	Ishkeen	Berberis brandisiana Ahrendt	Berberidaceae	root, stem, bark	8	decoction	Shrub	2	1	0	0	0	0	0	0	0	1	0	0	0	1	0	0	1	1	0	0	0	1	0	0	0	0	0	0	0
Phekar	Nagar	36.263297°	74.594568°	Ishkeen	Berberis brandisiana Ahrendt	Berberidaceae	root, stem, bark	8	decoction	Shrub	1	1	0	2	0	0	0	0	0	1	0	0	0	1	0	0	0	1	0	0	0	1	0	0	0	0	0	0	0
Phekar	Nagar	36.263297°	74.594568°	Ishkeen	Berberis brandisiana Ahrendt	Berberidaceae	root, stem, bark	7	decoction	Shrub	1	1	0	1	0	0	0	0	0	1	0	0	0	0	0	0	1	1	0	0	0	1	0	0	0	0	0	0	0
Basho	Skardu	35.469494°	75.359156°	Ishkeen	Berberis brandisiana Ahrendt	Berberidaceae	root, stem, bark	5	decoction	Shrub	1	1	0	0	0	0	0	0	1	1	0	0	0	0	0	0	0	0	0	0	0	0	0	0	0	0	0	1	0
Basho	Skardu	35.469494°	75.359156°	Ishkeen	Berberis brandisiana Ahrendt	Berberidaceae	root, stem, bark	7	decoction	Shrub	1	1	0	2	0	0	0	0	1	0	0	0	0	0	0	0	1	0	0	0	0	0	0	0	0	0	0	1	0
Basho	Skardu	35.469494°	75.359156°	Ishkeen	Berberis brandisiana Ahrendt	Berberidaceae	root, stem, bark	8	decoction	Shrub	2	1	0	1	0	0	0	0	1	0	0	0	0	1	0	0	1	0	0	0	0	1	0	0	0	0	0	0	0
Hashupi	Skardu	35.485929°	75.696578°	Ishkeen	Berberis brandisiana Ahrendt	Berberidaceae	root, stem, bark	11	decoction	Shrub	3	1	0	2	0	0	0	0	0	1	0	0	0	1	0	1	0	0	0	0	0	1	0	0	0	0	0	1	0
Hashupi	Skardu	35.485929°	75.696578°	Ishkeen	Berberis brandisiana Ahrendt	Berberidaceae	root, stem, bark	11	decoction	Shrub	3	0	0	1	0	0	0	0	1	1	0	0	0	1	0	1	1	0	0	0	0	1	0	0	0	0	0	1	0
Thowar	Skardu	35.609167°	75.203611°	Ishkeen	Berberis brandisiana Ahrendt	Berberidaceae	root, stem, bark	12	decoction	Shrub	3	1	0	2	0	0	0	0	0	1	0	0	0	1	0	1	1	0	0	0	0	1	0	0	0	0	0	1	0
Gahkuch	Ghizer	36.162949°	73.755492°	Ishkeen	Berberis lycium Royle	Berberidaceae	root, leaves, stem, fruit	12	decoction	Shrub	2	1	2	0	0	0	0	1	0	0	0	0	0	1	0	0	0	1	0	0	1	0	0	1	0	1	0	1	0
Gahkuch	Ghizer	36.162949°	73.755492°	Ishkeen	Berberis lycium Royle	Berberidaceae	root, leaves, stem, fruit	13	decoction	Shrub	2	1	2	0	0	0	0	2	0	0	0	0	0	1	0	0	0	1	0	0	1	0	0	1	0	1	0	1	0
Gahkuch	Ghizer	36.162949°	73.755492°	Ishkeen	Berberis lycium Royle	Berberidaceae	root, leaves, stem, fruit	13	decoction	Shrub	1	1	3	0	0	0	0	2	0	0	0	0	0	1	0	0	0	1	0	0	1	0	0	1	0	1	0	1	0
Gahkuch	Ghizer	36.162949°	73.755492°	Ishkeen	Berberis lycium Royle	Berberidaceae	root, fruit	7	decoction	Shrub	1	0	2	1	0	0	0	1	0	0	0	0	0	0	0	0	0	0	0	0	0	1	0	0	0	1	0	0	0
Gahkuch	Ghizer	36.162949°	73.755492°	Ishkeen	Berberis lycium Royle	Berberidaceae	root, leaves, stem, fruit	13	decoction	Shrub	1	1	3	0	0	0	0	2	0	0	0	0	0	1	0	0	0	1	0	0	1	0	0	1	0	1	0	1	0
Gahkuch	Ghizer	36.162949°	73.755492°	Ishkeen	Berberis lycium Royle	Berberidaceae	root, fruit	9	decoction	Shrub	1	0	3	1	0	0	0	2	0	0	0	0	0	0	0	0	0	0	0	0	0	1	0	0	0	1	0	0	0
Yaseen	Ghizer	36.369354°	73.332552°	Ishkeen	Berberis lycium Royle	Berberidaceae	root, leaves, stem, fruit	16	decoction	Shrub	2	1	4	0	0	0	0	3	0	0	0	0	0	1	0	0	0	1	0	0	1	0	0	1	0	1	0	1	0
Yaseen	Ghizer	36.369354°	73.332552°	Ishkeen	Berberis lycium Royle	Berberidaceae	root, fruit	13	decoction	Shrub	2	0	4	1	0	0	0	3	0	0	0	0	0	0	0	0	0	1	0	0	0	1	0	0	0	1	0	0	0
Yaseen	Ghizer	36.369354°	73.332552°	Ishkeen	Berberis lycium Royle	Berberidaceae	root, fruit	10	decoction	Shrub	2	0	4	1	0	0	0	1	0	0	0	0	0	0	0	0	0	0	0	0	0	1	0	0	0	1	0	0	0
Yaseen	Ghizer	36.369354°	73.332552°	Ishkeen	Berberis lycium Royle	Berberidaceae	root, fruit	11	decoction	Shrub	2	0	3	1	0	0	0	3	0	0	0	0	0	0	0	0	0	0	0	0	0	1	0	0	0	1	0	0	0
Yaseen	Ghizer	36.369354°	73.332552°	Ishkeen	Berberis lycium Royle	Berberidaceae	root, leaves, stem, fruit	15	decoction	Shrub	2	1	4	0	0	0	0	2	0	0	0	0	0	1	0	0	0	1	0	0	1	0	0	1	0	1	0	1	0
Yaseen	Ghizer	36.369354°	73.332552°	Ishkeen	Berberis lycium Royle	Berberidaceae	root, fruit	12	decoction	Shrub	1	0	4	1	0	0	0	3	0	0	0	0	0	1	0	0	0	0	0	0	0	1	0	0	0	1	0	0	0
Yaseen	Ghizer	36.369354°	73.332552°	Ishkeen	Berberis lycium Royle	Berberidaceae	root, leaves, stem, fruit	13	decoction	Shrub	2	1	2	0	0	0	0	3	0	0	0	0	0	1	0	0	0	1	0	0	0	0	0	1	0	1	0	1	0
Yaseen	Ghizer	36.369354°	73.332552°	Ishkeen	Berberis lycium Royle	Berberidaceae	root, fruit	12	decoction	Shrub	2	0	3	1	0	0	0	2	0	0	0	0	0	1	0	0	0	1	0	0	0	1	0	0	0	1	0	0	0
Kargha	Gilgit	35.915251°	74.257648°	Ishkein	Berberis lycium Royle	Berberidaceae	root, bark, fruit, seed	11	decoction	Shrub	2	0	4	1	0	0	0	1	0	0	0	0	0	0	0	0	0	0	0	0	0	0	0	1	0	1	0	1	0
Kargha	Gilgit	35.915251°	74.257648°	Ishkein	Berberis lycium Royle	Berberidaceae	root, flower, bark, berries	13	decoction	Shrub	2	1	4	1	0	0	0	1	0	0	0	0	0	0	0	0	0	1	0	0	0	1	0	1	0	1	0	0	0
Kargha	Gilgit	35.915251°	74.257648°	Ishkein	Berberis lycium Royle	Berberidaceae	root, bark, fruit, seed	11	decoction	Shrub	2	0	4	1	0	0	0	1	0	0	0	0	0	0	0	0	0	0	0	0	0	0	0	1	0	1	0	1	0
Kargha	Gilgit	35.915251°	74.257648°	Ishkein	Berberis lycium Royle	Berberidaceae	root, flower, bark, berries	12	decoction	Shrub	2	1	3	1	0	0	0	1	0	0	0	0	0	0	0	0	0	1	0	0	0	1	0	1	0	1	0	0	0
Kargha	Gilgit	35.915251°	74.257648°	Ishkein	Berberis lycium Royle	Berberidaceae	root, flower, bark, berries	10	decoction	Shrub	2	0	3	0	0	0	0	2	0	0	0	0	0	0	0	0	0	1	0	0	0	1	0	0	0	1	0	0	0
Kargha	Gilgit	35.915251°	74.257648°	Ishkein	Berberis lycium Royle	Berberidaceae	root, bark, fruit, seed	9	decoction	Shrub	1	0	3	1	0	0	0	1	0	0	0	0	0	0	0	0	0	0	0	0	0	0	0	1	0	1	0	1	0
Kargha	Gilgit	35.915251°	74.257648°	Ishkein	Berberis lycium Royle	Berberidaceae	root, flower, bark, berries	10	decoction	Shrub	1	1	4	0	0	0	0	1	0	0	0	0	0	0	0	0	0	1	0	0	0	1	0	0	0	1	0	0	0
Kargha	Gilgit	35.915251°	74.257648°	Ishkein	Berberis lycium Royle	Berberidaceae	root, bark, fruit, seed	10	decoction	Shrub	2	1	3	0	0	0	0	1	0	0	0	0	0	0	0	0	0	0	0	0	0	0	0	1	0	1	0	1	0
Kargha	Gilgit	35.915251°	74.257648°	Ishkein	Berberis lycium Royle	Berberidaceae	root, flower, bark, berries	11	decoction	Shrub	2	1	3	1	0	0	0	1	0	0	0	0	0	0	0	0	0	1	0	0	0	1	0	0	0	1	0	0	0
Rahimabad	Gilgit	36.118837°	74.297376°	Ishkein	Berberis lycium Royle	Berberidaceae	root, flower, bark, berries	12	decoction	Shrub	2	1	4	0	0	0	0	1	0	0	0	0	0	0	0	0	0	1	0	0	0	1	0	1	0	1	0	0	0
Rahimabad	Gilgit	36.118837°	74.297376°	Ishkein	Berberis lycium Royle	Berberidaceae	root, bark, fruit, seed	11	decoction	Shrub	2	1	3	1	0	0	0	1	0	0	0	0	0	0	0	0	0	0	0	0	0	0	0	1	0	1	0	1	0
Rahimabad	Gilgit	36.118837°	74.297376°	Ishkein	Berberis lycium Royle	Berberidaceae	root, bark, fruit, seed	7	decoction	Shrub	2	0	3	0	0	0	0	0	0	0	0	0	0	0	0	0	0	0	0	0	0	0	0	0	0	1	0	1	0
Rahimabad	Gilgit	36.118837°	74.297376°	Ishkein	Berberis lycium Royle	Berberidaceae	root, bark, fruit, seed	8	decoction	Shrub	1	0	3	0	0	0	0	1	0	0	0	0	0	0	0	0	0	0	0	0	0	0	0	1	0	1	0	1	0
Rahimabad	Gilgit	36.118837°	74.297376°	Ishkein	Berberis lycium Royle	Berberidaceae	root, flower, bark, berries	13	decoction	Shrub	2	0	4	1	0	0	0	2	0	0	0	0	0	0	0	0	0	1	0	0	0	1	0	1	0	1	0	0	0
Aliabad	Hunza	36.308563°	74.619496°	Ishkeen	Berberis lycium Royle	Berberidaceae	root, stem, bark	11	decoction	Shrub	1	0	3	1	0	0	0	2	0	0	0	0	0	1	0	0	0	1	0	0	1	1	0	0	0	0	0	0	0
Aliabad	Hunza	36.308563°	74.619496°	Ishkeen	Berberis lycium Royle	Berberidaceae	root	9	decoction	Shrub	1	0	4	0	0	0	0	2	0	0	0	0	0	1	0	0	0	0	0	0	0	1	0	0	0	0	0	0	0
Aliabad	Hunza	36.308563°	74.619496°	Ishkeen	Berberis lycium Royle	Berberidaceae		10	decoction	Shrub	1	0	2	1	0	0	0	2	0	0	0	0	0	1	0	0	0	0	0	0	1	1	0	1	0	0	0	0	0
Aliabad	Hunza	36.308563°	74.619496°	Ishkeen	Berberis lycium Royle	Berberidaceae	root, stem, bark	11	decoction	Shrub	1	0	3	1	0	0	0	2	0	0	0	0	0	1	0	0	0	1	0	0	1	1	0	0	0	0	0	0	0
Aliabad	Hunza	36.308563°	74.619496°	Ishkeen	Berberis lycium Royle	Berberidaceae	root	9	decoction	Shrub	1	0	4	0	0	0	0	2	0	0	0	0	0	1	0	0	0	0	0	0	0	1	0	0	0	0	0	0	0
Aliabad	Hunza	36.308563°	74.619496°	Ishkeen	Berberis lycium Royle	Berberidaceae		10	decoction	Shrub	1	0	2	1	0	0	0	2	0	0	0	0	0	1	0	0	0	0	0	0	1	1	0	1	0	0	0	0	0
Altit	Hunza	36.316102°	74.681835°	Ishkeen	Berberis lycium Royle	Berberidaceae		11	decoction	Shrub	1	0	2	1	0	0	0	3	0	0	0	0	0	1	0	0	0	0	0	0	1	1	0	1	0	0	0	0	0
Altit	Hunza	36.316102°	74.681835°	Ishkeen	Berberis lycium Royle	Berberidaceae	root, stem, bark	11	decoction	Shrub	1	0	3	1	0	0	0	2	0	0	0	0	0	1	0	0	0	1	0	0	1	1	0	0	0	0	0	0	0
Altit	Hunza	36.316102°	74.681835°	Ishkeen	Berberis lycium Royle	Berberidaceae	root	9	decoction	Shrub	1	0	4	0	0	0	0	2	0	0	0	0	0	1	0	0	0	0	0	0	0	1	0	0	0	0	0	0	0
Altit	Hunza	36.316102°	74.681835°	Ishkeen	Berberis lycium Royle	Berberidaceae	root, stem, bark	11	decoction	Shrub	1	0	3	1	0	0	0	2	0	0	0	0	0	1	0	0	0	1	0	0	1	1	0	0	0	0	0	0	0
Altit	Hunza	36.316102°	74.681835°	Ishkeen	Berberis lycium Royle	Berberidaceae		10	decoction	Shrub	1	0	2	1	0	0	0	2	0	0	0	0	0	1	0	0	0	0	0	0	1	1	0	1	0	0	0	0	0
Altit	Hunza	36.316102°	74.681835°	Ishkeen	Berberis lycium Royle	Berberidaceae		10	decoction	Shrub	1	0	2	1	0	0	0	2	0	0	0	0	0	1	0	0	0	0	0	0	1	1	0	1	0	0	0	0	0
Ghulkin	Hunza	36.407318°	74.863984°	Zolg	Berberis lycium Royle	Berberidaceae	root, leaves, fruit	10	decoction	Shrub	2	0	3	1	0	0	0	2	0	0	0	0	0	0	0	0	0	0	0	0	0	1	0	0	0	0	0	1	0
Ghulkin	Hunza	36.407318°	74.863984°	Zolg	Berberis lycium Royle	Berberidaceae	root, leaves, fruit	10	decoction	Shrub	2	0	3	1	0	0	0	2	0	0	0	0	0	0	0	0	0	0	0	0	0	1	0	0	0	0	0	1	0
Ghulkin	Hunza	36.407318°	74.863984°	Zolg	Berberis lycium Royle	Berberidaceae	root, leaves, fruit	8	decoction	Shrub	2	0	3	1	0	0	0	2	0	0	0	0	0	0	0	0	0	0	0	0	0	0	0	0	0	0	0	0	0
Ghulkin	Hunza	36.407318°	74.863984°	Zolg	Berberis lycium Royle	Berberidaceae	root, leaves, fruit	10	decoction	Shrub	2	0	3	1	0	0	0	2	0	0	0	0	0	0	0	0	0	0	0	0	0	1	0	0	0	0	0	1	0
Karimabad	Hunza	36.326408°	74.664316°	Ishkeen	Berberis lycium Royle	Berberidaceae	root	9	decoction	Shrub	1	0	4	0	0	0	0	2	0	0	0	0	0	1	0	0	0	0	0	0	0	1	0	0	0	0	0	0	0
Karimabad	Hunza	36.326408°	74.664316°	Ishkeen	Berberis lycium Royle	Berberidaceae	root	9	decoction	Shrub	1	0	4	0	0	0	0	2	0	0	0	0	0	1	0	0	0	0	0	0	0	1	0	0	0	0	0	0	0
Karimabad	Hunza	36.326408°	74.664316°	Ishkeen	Berberis lycium Royle	Berberidaceae		10	decoction	Shrub	1	0	2	1	0	0	0	2	0	0	0	0	0	1	0	0	0	0	0	0	1	1	0	1	0	0	0	0	0
Karimabad	Hunza	36.326408°	74.664316°	Ishkeen	Berberis lycium Royle	Berberidaceae	root	9	decoction	Shrub	1	0	4	0	0	0	0	2	0	0	0	0	0	1	0	0	0	0	0	0	0	1	0	0	0	0	0	0	0
Murtazaabad	Hunza	36.285517°	74.607833°	Ishkeen	Berberis lycium Royle	Berberidaceae	root, stem, bark	11	decoction	Shrub	1	0	3	1	0	0	0	2	0	0	0	0	0	1	0	0	0	1	0	0	1	1	0	0	0	0	0	0	0
Murtazaabad	Hunza	36.285517°	74.607833°	Ishkeen	Berberis lycium Royle	Berberidaceae		10	decoction	Shrub	1	0	2	1	0	0	0	2	0	0	0	0	0	1	0	0	0	0	0	0	1	1	0	1	0	0	0	0	0
Murtazaabad	Hunza	36.285517°	74.607833°	Ishkeen	Berberis lycium Royle	Berberidaceae	root	9	decoction	Shrub	1	0	4	0	0	0	0	2	0	0	0	0	0	1	0	0	0	0	0	0	0	1	0	0	0	0	0	0	0
Murtazaabad	Hunza	36.285517°	74.607833°	Ishkeen	Berberis lycium Royle	Berberidaceae	root, stem, bark	11	decoction	Shrub	1	0	3	1	0	0	0	2	0	0	0	0	0	1	0	0	0	1	0	0	1	1	0	0	0	0	0	0	0
Murtazaabad	Hunza	36.285517°	74.607833°	Ishkeen	Berberis lycium Royle	Berberidaceae	root, stem, bark	11	decoction	Shrub	1	0	3	1	0	0	0	2	0	0	0	0	0	1	0	0	0	1	0	0	1	1	0	0	0	0	0	0	0
Shimshal	Hunza	36.436464°	75.313109°	Zolg	Berberis lycium Royle	Berberidaceae	root, leaves, fruit	6	decoction	Shrub	2	0	3	0	0	0	0	1	0	0	0	0	0	0	0	0	0	0	0	0	0	0	0	0	0	0	0	0	0
Shimshal	Hunza	36.436464°	75.313109°	Zolg	Berberis lycium Royle	Berberidaceae	root, leaves, fruit	7	decoction	Shrub	2	0	3	0	0	0	0	1	0	0	0	0	0	0	0	0	0	0	0	0	0	1	0	0	0	0	0	0	0
Shimshal	Hunza	36.436464°	75.313109°	Zolg	Berberis lycium Royle	Berberidaceae	root, leaves, fruit	8	decoction	Shrub	2	0	3	1	0	0	0	1	0	0	0	0	0	0	0	0	0	0	0	0	0	1	0	0	0	0	0	0	0
Ghulmit	Nagar	36.241766°	74.462110°	Ishkeen	Berberis lycium Royle	Berberidaceae	root, flower, bark, berries	13	decoction	Shrub	1	0	4	1	0	0	0	2	0	0	0	0	0	0	0	0	0	1	0	0	0	1	0	1	0	1	1	0	0
Minapin	Nagar	36.250922°	74.536075°	Ishkeen	Berberis lycium Royle	Berberidaceae	root, bark, fruit, seed	12	decoction	Shrub	2	0	4	1	0	0	0	1	0	0	0	0	0	0	0	0	0	0	0	0	0	0	0	1	0	1	1	1	0
Nagar Khas	Nagar	36.276377°	74.719955°	Ishkeen	Berberis lycium Royle	Berberidaceae	root, bark, fruit, seed	12	decoction	Shrub	2	0	4	1	0	0	0	1	0	0	0	0	0	0	0	0	0	0	0	0	0	0	0	1	0	1	1	1	0
Nagar Khas	Nagar	36.276377°	74.719955°	Ishkeen	Berberis lycium Royle	Berberidaceae	root, flower, bark, berries	14	decoction	Shrub	2	0	4	1	0	0	0	2	0	0	0	0	0	0	0	0	0	1	0	0	0	1	0	1	0	1	1	0	0
Basho	Skardu	35.469494°	75.359156°	Skyurboo	Berberis lycium Royle	Berberidaceae	root, bark, fruit, seed	7	decoction	Shrub	1	0	4	1	0	0	0	0	0	0	0	0	0	0	0	0	0	0	0	0	0	0	0	1	0	0	0	0	0
Basho	Skardu	35.469494°	75.359156°	Skyurboo	Berberis lycium Royle	Berberidaceae	leaves, fruit, bark, root	10	decoction	Shrub	2	0	3	1	0	0	0	1	0	0	0	0	0	1	0	0	0	1	0	0	0	0	0	1	0	0	0	0	0
Basho	Skardu	35.469494°	75.359156°	Skyurboo	Berberis lycium Royle	Berberidaceae	root, bark, fruit, seed	5	decoction	Shrub	0	0	4	0	0	0	0	1	0	0	0	0	0	0	0	0	0	0	0	0	0	0	0	0	0	0	0	0	0
Basho	Skardu	35.469494°	75.359156°	Skyurboo	Berberis lycium Royle	Berberidaceae	leaves, fruit, bark, root	8	decoction	Shrub	1	0	2	1	0	0	0	1	0	0	0	0	0	1	0	0	0	1	0	0	0	0	0	1	0	0	0	0	0
Hashupi	Skardu	35.485929°	75.696578°	Skyurboo	Berberis lycium Royle	Berberidaceae	leaves, fruit, bark, root	10	decoction	Shrub	1	0	4	1	0	0	0	1	0	0	0	0	0	1	0	0	0	1	0	0	0	0	0	1	0	0	0	0	0
Hashupi	Skardu	35.485929°	75.696578°	Skyurboo	Berberis lycium Royle	Berberidaceae	leaves, fruit, bark, root	8	decoction	Shrub	1	0	3	0	0	0	0	1	0	0	0	0	0	1	0	0	0	1	0	0	0	0	0	1	0	0	0	0	0
Hashupi	Skardu	35.485929°	75.696578°	Skyurboo	Berberis lycium Royle	Berberidaceae	leaves, fruit, bark, root	10	decoction	Shrub	1	0	4	0	0	0	0	2	0	0	0	0	0	1	0	0	0	1	0	0	0	0	0	1	0	0	0	0	0
Hashupi	Skardu	35.485929°	75.696578°	Skyurboo	Berberis lycium Royle	Berberidaceae	root, bark, fruit, seed	6	decoction	Shrub	1	0	4	1	0	0	0	0	0	0	0	0	0	0	0	0	0	0	0	0	0	0	0	0	0	0	0	0	0
Hashupi	Skardu	35.485929°	75.696578°	Skyurboo	Berberis lycium Royle	Berberidaceae	leaves, fruit, bark, root	8	decoction	Shrub	2	0	1	1	0	0	0	1	0	0	0	0	0	1	0	0	0	1	0	0	0	0	0	1	0	0	0	0	0
Hashupi	Skardu	35.485929°	75.696578°	Skyurboo	Berberis lycium Royle	Berberidaceae	root, bark, fruit, seed	7	decoction	Shrub	2	0	1	1	0	0	0	1	0	0	0	0	0	0	0	0	0	1	0	0	0	0	0	1	0	0	0	0	0
Hosho	Skardu	35.345214°	75.515283°	Skyurboo	Berberis lycium Royle	Berberidaceae	root, bark, fruit, seed	10	decoction	Shrub	2	0	4	1	0	0	0	1	0	0	0	0	0	0	0	0	0	0	0	0	0	1	0	1	0	0	0	0	0
Hosho	Skardu	35.345214°	75.515283°	Skyurboo	Berberis lycium Royle	Berberidaceae	leaves, fruit, bark, root	8	decoction	Shrub	2	0	2	0	0	0	0	1	0	0	0	0	0	1	0	0	0	1	0	0	0	0	0	1	0	0	0	0	0
Thowar	Skardu	35.609167°	75.203611°	Skyurboo	Berberis lycium Royle	Berberidaceae	root, bark, fruit, seed	4	decoction	Shrub	0	0	3	0	0	0	0	1	0	0	0	0	0	0	0	0	0	0	0	0	0	0	0	0	0	0	0	0	0
Thowar	Skardu	35.609167°	75.203611°	Skyurboo	Berberis lycium Royle	Berberidaceae	root, bark, fruit, seed	4	decoction	Shrub	1	0	1	1	0	0	0	0	0	0	0	0	0	1	0	0	0	0	0	0	0	0	0	0	0	0	0	0	0
Bilchar/Bagrote	Gilgit	35.942517°	74.545274°	Ishkeen	Berberis orthobotrys Bien. ex Aitch.	Berberidaceae	root, stem, bark	9	decoction	Shrub	1	1	0	0	0	0	0	0	0	1	0	0	0	1	0	1	1	0	0	0	0	1	0	0	0	1	0	1	0
Bilchar/Bagrote	Gilgit	35.942517°	74.545274°	Ishkeen	Berberis orthobotrys Bien. ex Aitch.	Berberidaceae	root, stem, bark	3	decoction	Shrub	0	1	0	0	0	0	0	2	0	0	0	0	0	0	0	0	0	0	0	0	0	0	0	0	0	0	0	0	0
Bilchar/Bagrote	Gilgit	35.942517°	74.545274°	Ishkeen	Berberis orthobotrys Bien. ex Aitch.	Berberidaceae	root, stem, bark	7	decoction	Shrub	1	1	0	0	0	0	0	1	0	0	0	0	0	0	0	1	1	0	0	0	0	0	0	0	0	1	0	1	0
Bilchar/Bagrote	Gilgit	35.942517°	74.545274°	Ishkeen	Berberis orthobotrys Bien. ex Aitch.	Berberidaceae	root, stem, bark	3	decoction	Shrub	0	0	0	0	0	0	0	2	0	0	0	0	0	0	0	0	0	0	0	0	0	0	0	0	0	1	0	0	0
Bilchar/Bagrote	Gilgit	35.942517°	74.545274°	Ishkeen	Berberis orthobotrys Bien. ex Aitch.	Berberidaceae	root, stem, bark	3	decoction	Shrub	0	0	0	0	0	0	0	2	0	0	0	0	0	0	0	0	0	0	0	0	0	0	0	0	0	1	0	0	0
Danyore	Gilgit	35.919880°	74.386181°	Ishkeen	Berberis orthobotrys Bien. ex Aitch.	Berberidaceae	root, stem, bark	10	decoction	Shrub	1	0	0	0	0	0	0	2	0	1	0	0	0	1	0	1	1	0	0	0	0	1	0	0	0	1	0	1	0
Danyore	Gilgit	35.919880°	74.386181°	Ishkeen	Berberis orthobotrys Bien. ex Aitch.	Berberidaceae	root, stem, bark	3	decoction	Shrub	0	0	0	0	0	0	0	2	0	0	0	0	0	0	0	0	0	0	0	0	0	0	0	0	0	1	0	0	0
Danyore	Gilgit	35.919880°	74.386181°	Ishkeen	Berberis orthobotrys Bien. ex Aitch.	Berberidaceae	root, stem, bark	3	decoction	Shrub	0	0	0	0	0	0	0	2	0	0	0	0	0	0	0	0	0	0	0	0	0	0	0	0	0	1	0	0	0
Danyore	Gilgit	35.919880°	74.386181°	Ishkeen	Berberis orthobotrys Bien. ex Aitch.	Berberidaceae	root, stem, bark	3	decoction	Shrub	0	0	0	0	0	0	0	2	0	0	0	0	0	0	0	0	0	0	0	0	0	0	0	0	0	1	0	0	0
Jalalabad	Gilgit	35.880457°	74.493590°	Ishkeen	Berberis orthobotrys Bien. ex Aitch.	Berberidaceae	root, stem, bark	4	decoction	Shrub	1	1	0	0	0	0	0	2	0	0	0	0	0	0	0	0	0	0	0	0	0	0	0	0	0	0	0	0	0
Jalalabad	Gilgit	35.880457°	74.493590°	Ishkeen	Berberis orthobotrys Bien. ex Aitch.	Berberidaceae	root, stem, bark	5	decoction	Shrub	1	1	0	0	0	0	0	2	0	0	0	0	0	0	0	0	0	0	0	0	0	0	0	0	0	1	0	0	0
Jalalabad	Gilgit	35.880457°	74.493590°	Ishkeen	Berberis orthobotrys Bien. ex Aitch.	Berberidaceae	root, stem, bark	5	decoction	Shrub	0	0	0	0	0	0	0	0	0	1	0	0	0	0	0	1	1	0	0	0	0	1	0	0	0	1	0	0	0
Jalalabad	Gilgit	35.880457°	74.493590°	Ishkeen	Berberis orthobotrys Bien. ex Aitch.	Berberidaceae	root, stem, bark	3	decoction	Shrub	0	0	0	0	0	0	0	2	0	0	0	0	0	0	0	0	0	0	0	0	0	0	0	0	0	1	0	0	0
Jalalabad	Gilgit	35.880457°	74.493590°	Ishkeen	Berberis orthobotrys Bien. ex Aitch.	Berberidaceae	root, stem, bark	3	decoction	Shrub	0	0	0	0	0	0	0	2	0	0	0	0	0	0	0	0	0	0	0	0	0	0	0	0	0	1	0	0	0
Kargha	Gilgit	35.915251°	74.257648°	Ishkein	Berberis orthobotrys Bien. ex Aitch.	Berberidaceae	root, stem, bark	4	decoction	Shrub	0	0	0	1	0	0	0	2	0	0	0	0	0	0	0	0	0	0	0	0	0	0	0	0	0	1	0	0	0
Kargha	Gilgit	35.915251°	74.257648°	Ishkein	Berberis orthobotrys Bien. ex Aitch.	Berberidaceae	root, stem, bark	4	decoction	Shrub	0	0	0	1	0	0	0	2	0	0	0	0	0	0	0	0	0	0	0	0	0	0	0	0	0	1	0	0	0
Kargha	Gilgit	35.915251°	74.257648°	Ishkein	Berberis orthobotrys Bien. ex Aitch.	Berberidaceae	root, stem, bark	4	decoction	Shrub	0	0	0	1	0	0	0	2	0	0	0	0	0	0	0	0	0	0	0	0	0	0	0	0	0	1	0	0	0
Kargha	Gilgit	35.915251°	74.257648°	Ishkein	Berberis orthobotrys Bien. ex Aitch.	Berberidaceae	root, stem, bark	4	decoction	Shrub	0	0	0	1	0	0	0	2	0	0	0	0	0	0	0	0	0	0	0	0	0	0	0	0	0	1	0	0	0
Kargha	Gilgit	35.915251°	74.257648°	Ishkein	Berberis orthobotrys Bien. ex Aitch.	Berberidaceae	root, stem, bark	2	decoction	Shrub	0	0	0	0	0	0	0	1	0	0	0	0	0	0	0	0	0	0	0	0	0	0	0	0	0	1	0	0	0
Kargha	Gilgit	35.915251°	74.257648°	Ishkein	Berberis orthobotrys Bien. ex Aitch.	Berberidaceae	root, stem, bark	2	decoction	Shrub	0	0	0	0	0	0	0	1	0	0	0	0	0	0	0	0	0	0	0	0	0	0	0	0	0	1	0	0	0
Kargha	Gilgit	35.915251°	74.257648°	Ishkein	Berberis orthobotrys Bien. ex Aitch.	Berberidaceae	root, stem	1	decoction	Shrub	0	0	0	0	0	0	0	1	0	0	0	0	0	0	0	0	0	0	0	0	0	0	0	0	0	0	0	0	0
Kargha	Gilgit	35.915251°	74.257648°	Ishkein	Berberis orthobotrys Bien. ex Aitch.	Berberidaceae	root, stem	1	decoction	Shrub	0	0	0	0	0	0	0	1	0	0	0	0	0	0	0	0	0	0	0	0	0	0	0	0	0	0	0	0	0
Kargha	Gilgit	35.915251°	74.257648°	Ishkein	Berberis orthobotrys Bien. ex Aitch.	Berberidaceae	root, stem	3	decoction	Shrub	0	0	0	1	0	0	0	2	0	0	0	0	0	0	0	0	0	0	0	0	0	0	0	0	0	0	0	0	0
Kargha	Gilgit	35.915251°	74.257648°	Ishkein	Berberis orthobotrys Bien. ex Aitch.	Berberidaceae	root, stem	3	decoction	Shrub	0	0	0	1	0	0	0	2	0	0	0	0	0	0	0	0	0	0	0	0	0	0	0	0	0	0	0	0	0
Rahimabad	Gilgit	36.118837°	74.297376°	Ishkein	Berberis orthobotrys Bien. ex Aitch.	Berberidaceae	root, stem, bark	4	decoction	Shrub	0	0	0	1	0	0	0	2	0	0	0	0	0	0	0	0	0	0	0	0	0	0	0	0	0	1	0	0	0
Rahimabad	Gilgit	36.118837°	74.297376°	Ishkein	Berberis orthobotrys Bien. ex Aitch.	Berberidaceae	root, stem	3	decoction	Shrub	0	0	0	1	0	0	0	2	0	0	0	0	0	0	0	0	0	0	0	0	0	0	0	0	0	0	0	0	0
Rahimabad	Gilgit	36.118837°	74.297376°	Ishkein	Berberis orthobotrys Bien. ex Aitch.	Berberidaceae	root, stem	1	decoction	Shrub	0	0	0	0	0	0	0	1	0	0	0	0	0	0	0	0	0	0	0	0	0	0	0	0	0	0	0	0	0
Rahimabad	Gilgit	36.118837°	74.297376°	Ishkein	Berberis orthobotrys Bien. ex Aitch.	Berberidaceae	root, stem	1	decoction	Shrub	0	0	0	0	0	0	0	1	0	0	0	0	0	0	0	0	0	0	0	0	0	0	0	0	0	0	0	0	0
Basho	Skardu	35.469494°	75.359156°	Skyurboo	Berberis orthobotrys Bien. ex Aitch.	Berberidaceae	root, stem	1	decoction	Shrub	0	0	0	0	0	0	0	1	0	0	0	0	0	0	0	0	0	0	0	0	0	0	0	0	0	0	0	0	0
Basho	Skardu	35.469494°	75.359156°	Skyurboo	Berberis orthobotrys Bien. ex Aitch.	Berberidaceae	root, stem	1	decoction	Shrub	0	0	0	0	0	0	0	1	0	0	0	0	0	0	0	0	0	0	0	0	0	0	0	0	0	0	0	0	0
Basho	Skardu	35.469494°	75.359156°	Skyurboo	Berberis orthobotrys Bien. ex Aitch.	Berberidaceae	root, stem	1	decoction	Shrub	0	0	0	0	0	0	0	1	0	0	0	0	0	0	0	0	0	0	0	0	0	0	0	0	0	0	0	0	0
Basho	Skardu	35.469494°	75.359156°	Skyurboo	Berberis orthobotrys Bien. ex Aitch.	Berberidaceae	root, stem	3	decoction	Shrub	0	0	0	1	0	0	0	2	0	0	0	0	0	0	0	0	0	0	0	0	0	0	0	0	0	0	0	0	0
Hashupi	Skardu	35.485929°	75.696578°	Skyurboo	Berberis orthobotrys Bien. ex Aitch.	Berberidaceae	root, stem	3	decoction	Shrub	0	0	0	1	0	0	0	2	0	0	0	0	0	0	0	0	0	0	0	0	0	0	0	0	0	0	0	0	0
Hashupi	Skardu	35.485929°	75.696578°	Skyurboo	Berberis orthobotrys Bien. ex Aitch.	Berberidaceae	root, stem	1	decoction	Shrub	0	0	0	0	0	0	0	1	0	0	0	0	0	0	0	0	0	0	0	0	0	0	0	0	0	0	0	0	0
Hashupi	Skardu	35.485929°	75.696578°	Skyurboo	Berberis orthobotrys Bien. ex Aitch.	Berberidaceae	root, stem	2	decoction	Shrub	0	0	0	0	0	0	0	2	0	0	0	0	0	0	0	0	0	0	0	0	0	0	0	0	0	0	0	0	0
Hashupi	Skardu	35.485929°	75.696578°	Skyurboo	Berberis orthobotrys Bien. ex Aitch.	Berberidaceae	root, stem	2	decoction	Shrub	0	0	0	1	0	0	0	1	0	0	0	0	0	0	0	0	0	0	0	0	0	0	0	0	0	0	0	0	0
Hashupi	Skardu	35.485929°	75.696578°	Skyurboo	Berberis orthobotrys Bien. ex Aitch.	Berberidaceae	root, stem	1	decoction	Shrub	0	0	0	0	0	0	0	1	0	0	0	0	0	0	0	0	0	0	0	0	0	0	0	0	0	0	0	0	0
Hashupi	Skardu	35.485929°	75.696578°	Skyurboo	Berberis orthobotrys Bien. ex Aitch.	Berberidaceae	root, stem	1	decoction	Shrub	0	0	0	0	0	0	0	1	0	0	0	0	0	0	0	0	0	0	0	0	0	0	0	0	0	0	0	0	0
Thowar	Skardu	35.609167°	75.203611°	Skyurboo	Berberis orthobotrys Bien. ex Aitch.	Berberidaceae	root, stem	3	decoction	Shrub	0	0	0	1	0	0	0	2	0	0	0	0	0	0	0	0	0	0	0	0	0	0	0	0	0	0	0	0	0
Thowar	Skardu	35.609167°	75.203611°	Skyurboo	Berberis orthobotrys Bien. ex Aitch.	Berberidaceae	root, stem	1	decoction	Shrub	0	0	0	0	0	0	0	1	0	0	0	0	0	0	0	0	0	0	0	0	0	0	0	0	0	0	0	0	0
Kargha	Gilgit	35.915251°	74.257648°	Ishkein	Berberis parkeriana C.K.Schneid.	Berberidaceae	root, stem	4	decoction	Shrub	1	0	0	1	0	0	0	2	0	0	0	0	0	0	0	0	0	0	0	0	0	0	0	0	0	0	0	0	0
Kargha	Gilgit	35.915251°	74.257648°	Ishkein	Berberis parkeriana C.K.Schneid.	Berberidaceae	root, stem	3	decoction	Shrub	1	0	0	0	0	0	0	2	0	0	0	0	0	0	0	0	0	0	0	0	0	0	0	0	0	0	0	0	0
Kargha	Gilgit	35.915251°	74.257648°	Ishkein	Berberis parkeriana C.K.Schneid.	Berberidaceae	root, stem	3	decoction	Shrub	1	0	0	1	0	0	0	1	0	0	0	0	0	0	0	0	0	0	0	0	0	0	0	0	0	0	0	0	0
Kargha	Gilgit	35.915251°	74.257648°	Ishkein	Berberis parkeriana C.K.Schneid.	Berberidaceae	root, stem	2	decoction	Shrub	0	0	0	1	0	0	0	1	0	0	0	0	0	0	0	0	0	0	0	0	0	0	0	0	0	0	0	0	0
Rahimabad	Gilgit	36.118837°	74.297376°	Ishkein	Berberis parkeriana C.K.Schneid.	Berberidaceae	root, stem	3	decoction	Shrub	1	0	0	1	0	0	0	1	0	0	0	0	0	0	0	0	0	0	0	0	0	0	0	0	0	0	0	0	0
Rahimabad	Gilgit	36.118837°	74.297376°	Ishkein	Berberis parkeriana C.K.Schneid.	Berberidaceae	root, stem	3	decoction	Shrub	1	0	0	1	0	0	0	1	0	0	0	0	0	0	0	0	0	0	0	0	0	0	0	0	0	0	0	0	0
Rahimabad	Gilgit	36.118837°	74.297376°	Ishkein	Berberis parkeriana C.K.Schneid.	Berberidaceae	root, stem	3	decoction	Shrub	1	0	0	0	0	0	0	2	0	0	0	0	0	0	0	0	0	0	0	0	0	0	0	0	0	0	0	0	0
Basho	Skardu	35.469494°	75.359156°	Skyurboo	Berberis parkeriana C.K.Schneid.	Berberidaceae	root, stem	2	decoction	Shrub	0	0	0	1	0	0	0	1	0	0	0	0	0	0	0	0	0	0	0	0	0	0	0	0	0	0	0	0	0
Hashupi	Skardu	35.485929°	75.696578°	Skyurboo	Berberis parkeriana C.K.Schneid.	Berberidaceae	root, stem	2	decoction	Shrub	0	0	0	1	0	0	0	1	0	0	0	0	0	0	0	0	0	0	0	0	0	0	0	0	0	0	0	0	0
Hashupi	Skardu	35.485929°	75.696578°	Skyurboo	Berberis parkeriana C.K.Schneid.	Berberidaceae	root, stem	2	decoction	Shrub	0	0	0	1	0	0	0	1	0	0	0	0	0	0	0	0	0	0	0	0	0	0	0	0	0	0	0	0	0
Hashupi	Skardu	35.485929°	75.696578°	Skyurboo	Berberis parkeriana C.K.Schneid.	Berberidaceae	root, stem	1	decoction	Shrub	0	0	0	1	0	0	0	0	0	0	0	0	0	0	0	0	0	0	0	0	0	0	0	0	0	0	0	0	0
Hashupi	Skardu	35.485929°	75.696578°	Skyurboo	Berberis parkeriana C.K.Schneid.	Berberidaceae	root, stem	2	decoction	Shrub	0	0	0	1	0	0	0	1	0	0	0	0	0	0	0	0	0	0	0	0	0	0	0	0	0	0	0	0	0
Hosho	Skardu	35.345214°	75.515283°	Skyurboo	Berberis parkeriana C.K.Schneid.	Berberidaceae	root, stem	2	decoction	Shrub	0	0	0	1	0	0	0	1	0	0	0	0	0	0	0	0	0	0	0	0	0	0	0	0	0	0	0	0	0
Thowar	Skardu	35.609167°	75.203611°	Skyurboo	Berberis parkeriana C.K.Schneid.	Berberidaceae	root, stem	1	decoction	Shrub	0	0	0	1	0	0	0	0	0	0	0	0	0	0	0	0	0	0	0	0	0	0	0	0	0	0	0	0	0
Eidgah	Astore	35.347049°	74.857882°	Skiorbu	Berberis pseudumbellata R.Parker	Berberidaceae	flower, fruit, seed	1	Decoction, powder/grinded	Shrub	0	0	0	0	0	0	0	0	0	0	0	0	0	1	0	0	0	0	0	0	0	0	0	0	0	0	0	0	0
Eidgah	Astore	35.347049°	74.857882°	Skiorbu	Berberis pseudumbellata R.Parker	Berberidaceae	flower, fruit, seed	1	Decoction, powder/grinded	Shrub	0	0	0	0	0	0	0	0	0	0	0	0	0	1	0	0	0	0	0	0	0	0	0	0	0	0	0	0	0
Gorikot	Astore	35.281969°	74.841940°	Skiorbu	Berberis pseudumbellata R.Parker	Berberidaceae	flower, fruit, seed	1	Decoction, powder/grinded	Shrub	0	0	0	0	0	0	0	0	0	0	0	0	0	1	0	0	0	0	0	0	0	0	0	0	0	0	0	0	0
Gorikot	Astore	35.281969°	74.841940°	Skiorbu	Berberis pseudumbellata R.Parker	Berberidaceae	flower, fruit, seed	1	Decoction, powder/grinded	Shrub	0	0	0	0	0	0	0	0	0	0	0	0	0	1	0	0	0	0	0	0	0	0	0	0	0	0	0	0	0
Gorikot	Astore	35.281969°	74.841940°	Skiorbu	Berberis pseudumbellata R.Parker	Berberidaceae	flower, fruit, seed	1	Decoction, powder/grinded	Shrub	0	0	0	0	0	0	0	0	0	0	0	0	0	1	0	0	0	0	0	0	0	0	0	0	0	0	0	0	0
Gorikot	Astore	35.281969°	74.841940°	Skiorbu	Berberis pseudumbellata R.Parker	Berberidaceae	flower, fruit, seed	1	Decoction, powder/grinded	Shrub	0	0	0	0	0	0	0	0	0	0	0	0	0	1	0	0	0	0	0	0	0	0	0	0	0	0	0	0	0
Bilchar/Bagrote	Gilgit	35.942517°	74.545274°	Ishkeen	Berberis pseudumbellata R.Parker	Berberidaceae	root, stem, bark	3	Decoction, powder/grinded	Shrub	1	0	0	0	0	0	0	2	0	0	0	0	0	0	0	0	0	0	0	0	0	0	0	0	0	0	0	0	0
Bilchar/Bagrote	Gilgit	35.942517°	74.545274°	Ishkeen	Berberis pseudumbellata R.Parker	Berberidaceae	root, stem, bark	4	Decoction, powder/grinded	Shrub	1	1	0	0	0	0	0	1	0	0	0	0	0	0	0	0	0	0	0	0	0	0	0	0	0	1	0	0	0
Bilchar/Bagrote	Gilgit	35.942517°	74.545274°	Ishkeen	Berberis pseudumbellata R.Parker	Berberidaceae	root, stem, bark	3	Decoction, powder/grinded	Shrub	0	0	0	0	0	0	0	2	0	0	0	0	0	0	0	0	0	0	0	0	0	0	0	0	0	1	0	0	0
Bilchar/Bagrote	Gilgit	35.942517°	74.545274°	Ishkeen	Berberis pseudumbellata R.Parker	Berberidaceae	root, stem, bark	3	Decoction, powder/grinded	Shrub	0	0	0	0	0	0	0	2	0	0	0	0	0	0	0	0	0	0	0	0	0	0	0	0	0	1	0	0	0
Bilchar/Bagrote	Gilgit	35.942517°	74.545274°	Ishkeen	Berberis pseudumbellata R.Parker	Berberidaceae	root, stem, bark	3	Decoction, powder/grinded	Shrub	0	0	0	0	0	0	0	2	0	0	0	0	0	0	0	0	0	0	0	0	0	0	0	0	0	1	0	0	0
Bilchar/Bagrote	Gilgit	35.942517°	74.545274°	Ishkeen	Berberis pseudumbellata R.Parker	Berberidaceae	root, stem, bark	3	Decoction, powder/grinded	Shrub	0	0	0	0	0	0	0	2	0	0	0	0	0	0	0	0	0	0	0	0	0	0	0	0	0	1	0	0	0
Danyore	Gilgit	35.919880°	74.386181°	Ishkeen	Berberis pseudumbellata R.Parker	Berberidaceae	root, stem, bark	3	Decoction, powder/grinded	Shrub	1	0	0	0	0	0	0	1	0	0	0	0	0	0	0	0	0	0	0	0	0	0	0	0	0	1	0	0	0
Danyore	Gilgit	35.919880°	74.386181°	Ishkeen	Berberis pseudumbellata R.Parker	Berberidaceae	root, stem, bark	5	Decoction, powder/grinded	Shrub	1	1	0	0	0	0	0	2	0	0	0	0	0	0	0	0	0	0	0	0	0	0	0	0	0	1	0	0	0
Danyore	Gilgit	35.919880°	74.386181°	Ishkeen	Berberis pseudumbellata R.Parker	Berberidaceae	root, stem, bark	3	Decoction, powder/grinded	Shrub	0	0	0	0	0	0	0	2	0	0	0	0	0	0	0	0	0	0	0	0	0	0	0	0	0	1	0	0	0
Jalalabad	Gilgit	35.880457°	74.493590°	Ishkeen	Berberis pseudumbellata R.Parker	Berberidaceae	root, stem, bark	2	Decoction, powder/grinded	Shrub	1	1	0	0	0	0	0	0	0	0	0	0	0	0	0	0	0	0	0	0	0	0	0	0	0	0	0	0	0
Jalalabad	Gilgit	35.880457°	74.493590°	Ishkeen	Berberis pseudumbellata R.Parker	Berberidaceae	root, stem, bark	2	Decoction, powder/grinded	Shrub	0	0	0	0	0	0	0	1	0	0	0	0	0	0	0	0	0	0	0	0	0	0	0	0	0	1	0	0	0
Jalalabad	Gilgit	35.880457°	74.493590°	Ishkeen	Berberis pseudumbellata R.Parker	Berberidaceae	root, stem, bark	3	Decoction, powder/grinded	Shrub	0	0	0	0	0	0	0	2	0	0	0	0	0	0	0	0	0	0	0	0	0	0	0	0	0	1	0	0	0
Jalalabad	Gilgit	35.880457°	74.493590°	Ishkeen	Berberis pseudumbellata R.Parker	Berberidaceae	root, stem, bark	3	Decoction, powder/grinded	Shrub	0	0	0	0	0	0	0	2	0	0	0	0	0	0	0	0	0	0	0	0	0	0	0	0	0	1	0	0	0
Jalalabad	Gilgit	35.880457°	74.493590°	Ishkeen	Berberis pseudumbellata R.Parker	Berberidaceae	root, stem, bark	3	Decoction, powder/grinded	Shrub	0	0	0	0	0	0	0	2	0	0	0	0	0	0	0	0	0	0	0	0	0	0	0	0	0	1	0	0	0
Kargha	Gilgit	35.915251°	74.257648°	Ishkein	Berberis pseudumbellata R.Parker	Berberidaceae	root, leaves	2	Decoction, powder/grinded	Shrub	1	0	1	0	0	0	0	0	0	0	0	0	0	0	0	0	0	0	0	0	0	0	0	0	0	0	0	0	0
Kargha	Gilgit	35.915251°	74.257648°	Ishkein	Berberis pseudumbellata R.Parker	Berberidaceae	root, leaves	2	Decoction, powder/grinded	Shrub	2	0	0	0	0	0	0	0	0	0	0	0	0	0	0	0	0	0	0	0	0	0	0	0	0	0	0	0	0
Kargha	Gilgit	35.915251°	74.257648°	Ishkein	Berberis pseudumbellata R.Parker	Berberidaceae	root, leaves	1	Decoction	Shrub	0	0	1	0	0	0	0	0	0	0	0	0	0	0	0	0	0	0	0	0	0	0	0	0	0	0	0	0	0
Kargha	Gilgit	35.915251°	74.257648°	Ishkein	Berberis pseudumbellata R.Parker	Berberidaceae	root, leaves	2	Decoction, powder/grinded	Shrub	1	0	1	0	0	0	0	0	0	0	0	0	0	0	0	0	0	0	0	0	0	0	0	0	0	0	0	0	0
Kargha	Gilgit	35.915251°	74.257648°	Ishkein	Berberis pseudumbellata R.Parker	Berberidaceae	root, leaves	3	Decoction, powder/grinded	Shrub	2	0	1	0	0	0	0	0	0	0	0	0	0	0	0	0	0	0	0	0	0	0	0	0	0	0	0	0	0
Rahimabad	Gilgit	36.118837°	74.297376°	Ishkein	Berberis pseudumbellata R.Parker	Berberidaceae	root, leaves	2	Decoction, powder/grinded	Shrub	2	0	0	0	0	0	0	0	0	0	0	0	0	0	0	0	0	0	0	0	0	0	0	0	0	0	0	0	0
Rahimabad	Gilgit	36.118837°	74.297376°	Ishkein	Berberis pseudumbellata R.Parker	Berberidaceae	root, leaves	3	Decoction, powder/grinded	Shrub	2	0	1	0	0	0	0	0	0	0	0	0	0	0	0	0	0	0	0	0	0	0	0	0	0	0	0	0	0
Basho	Skardu	35.469494°	75.359156°	Shokurum	Berberis pseudumbellata R.Parker	Berberidaceae	root, leaves	3	Decoction, powder/grinded	Shrub	2	0	0	0	0	0	0	0	0	0	0	0	0	0	0	0	0	0	0	0	0	0	0	0	0	1	0	0	0
Basho	Skardu	35.469494°	75.359156°	Shokurum	Berberis pseudumbellata R.Parker	Berberidaceae	whole plant	1	Decoction, powder/grinded	Shrub	1	0	0	0	0	0	0	0	0	0	0	0	0	0	0	0	0	0	0	0	0	0	0	0	0	0	0	0	0
Basho	Skardu	35.469494°	75.359156°	Shokurum	Berberis pseudumbellata R.Parker	Berberidaceae	root, leaves	3	Decoction, powder/grinded	Shrub	2	0	1	0	0	0	0	0	0	0	0	0	0	0	0	0	0	0	0	0	0	0	0	0	0	0	0	0	0
Basho	Skardu	35.469494°	75.359156°	Shokurum	Berberis pseudumbellata R.Parker	Berberidaceae	root, leaves	3	Decoction, powder/grinded	Shrub	1	0	1	0	0	0	0	0	0	0	0	0	0	0	0	0	0	0	0	0	0	0	0	0	0	1	0	0	0
Basho	Skardu	35.469494°	75.359156°	Shokurum	Berberis pseudumbellata R.Parker	Berberidaceae	whole plant	2	Decoction, powder/grinded	Shrub	1	0	1	0	0	0	0	0	0	0	0	0	0	0	0	0	0	0	0	0	0	0	0	0	0	0	0	0	0
Basho	Skardu	35.469494°	75.359156°	Shokurum	Berberis pseudumbellata R.Parker	Berberidaceae	root, leaves	3	Decoction, powder/grinded	Shrub	1	0	1	0	0	0	0	0	0	0	0	0	0	0	0	0	0	0	0	0	0	0	0	0	0	1	0	0	0
Basho	Skardu	35.469494°	75.359156°	Shokurum	Berberis pseudumbellata R.Parker	Berberidaceae	root, leaves	3	Decoction, powder/grinded	Shrub	1	0	1	0	0	0	0	0	0	0	0	0	0	0	0	0	0	0	0	0	0	0	0	0	0	1	0	0	0
Hashupi	Skardu	35.485929°	75.696578°	Shokurum	Berberis pseudumbellata R.Parker	Berberidaceae	whole plant	2	Decoction, powder/grinded	Shrub	1	0	1	0	0	0	0	0	0	0	0	0	0	0	0	0	0	0	0	0	0	0	0	0	0	0	0	0	0
Hashupi	Skardu	35.485929°	75.696578°	Shokurum	Berberis pseudumbellata R.Parker	Berberidaceae	root, leaves	4	Decoction, powder/grinded	Shrub	2	0	1	0	0	0	0	0	0	0	0	0	0	0	0	0	0	0	0	0	0	0	0	0	0	1	0	0	0
Hashupi	Skardu	35.485929°	75.696578°	Shokurum	Berberis pseudumbellata R.Parker	Berberidaceae	root, leaves	3	Decoction, powder/grinded	Shrub	2	0	1	0	0	0	0	0	0	0	0	0	0	0	0	0	0	0	0	0	0	0	0	0	0	0	0	0	0
Hashupi	Skardu	35.485929°	75.696578°	Shokurum	Berberis pseudumbellata R.Parker	Berberidaceae	whole plant	2	Decoction, powder/grinded	Shrub	0	0	1	0	0	0	0	0	0	0	0	0	0	0	0	0	0	0	0	0	0	0	0	0	0	1	0	0	0
Hashupi	Skardu	35.485929°	75.696578°	Shokurum	Berberis pseudumbellata R.Parker	Berberidaceae	root, leaves	2	Decoction, powder/grinded	Shrub	0	0	1	0	0	0	0	0	0	0	0	0	0	0	0	0	0	0	0	0	0	0	0	0	0	1	0	0	0
Hashupi	Skardu	35.485929°	75.696578°	Shokurum	Berberis pseudumbellata R.Parker	Berberidaceae	whole plant	2	Decoction, powder/grinded	Shrub	1	0	1	0	0	0	0	0	0	0	0	0	0	0	0	0	0	0	0	0	0	0	0	0	0	0	0	0	0
Hashupi	Skardu	35.485929°	75.696578°	Shokurum	Berberis pseudumbellata R.Parker	Berberidaceae	root, leaves	3	Decoction, powder/grinded	Shrub	2	0	1	0	0	0	0	0	0	0	0	0	0	0	0	0	0	0	0	0	0	0	0	0	0	0	0	0	0
Hashupi	Skardu	35.485929°	75.696578°	Shokurum	Berberis pseudumbellata R.Parker	Berberidaceae	root, leaves	4	Decoction, powder/grinded	Shrub	2	0	1	0	0	0	0	0	0	0	0	0	0	0	0	0	0	0	0	0	0	0	0	0	0	1	0	0	0
Hosho	Skardu	35.345214°	75.515283°	Shokurum	Berberis pseudumbellata R.Parker	Berberidaceae	whole plant	1	Decoction, powder/grinded	Shrub	1	0	0	0	0	0	0	0	0	0	0	0	0	0	0	0	0	0	0	0	0	0	0	0	0	0	0	0	0
Thowar	Skardu	35.609167°	75.203611°	Shokurum	Berberis pseudumbellata R.Parker	Berberidaceae	root, leaves	4	Decoction, powder/grinded	Shrub	2	0	1	0	0	0	0	0	0	0	0	0	0	0	0	0	0	0	0	0	0	0	0	0	0	1	0	0	0
Thowar	Skardu	35.609167°	75.203611°	Shokurum	Berberis pseudumbellata R.Parker	Berberidaceae	root, leaves	2	Decoction, powder/grinded	Shrub	1	0	1	0	0	0	0	0	0	0	0	0	0	0	0	0	0	0	0	0	0	0	0	0	0	0	0	0	0
Kargha	Gilgit	35.915251°	74.257648°	Ishkein	Berberis stewartiana Jafri	Berberidaceae	root, leaves	3	Decoction	Shrub	1	0	1	0	0	0	0	0	0	0	0	0	0	1	0	0	0	0	0	0	0	0	0	0	0	0	0	0	0
Kargha	Gilgit	35.915251°	74.257648°	Ishkein	Berberis stewartiana Jafri	Berberidaceae	root, leaves	3	Decoction	Shrub	2	0	1	0	0	0	0	0	0	0	0	0	0	0	0	0	0	0	0	0	0	0	0	0	0	0	0	0	0
Kargha	Gilgit	35.915251°	74.257648°	Ishkein	Berberis stewartiana Jafri	Berberidaceae	root, leaves	3	Decoction	Shrub	2	0	1	0	0	0	0	0	0	0	0	0	0	0	0	0	0	0	0	0	0	0	0	0	0	0	0	0	0
Kargha	Gilgit	35.915251°	74.257648°	Ishkein	Berberis stewartiana Jafri	Berberidaceae	root, leaves	2	Decoction	Shrub	1	0	1	0	0	0	0	0	0	0	0	0	0	0	0	0	0	0	0	0	0	0	0	0	0	0	0	0	0
Kargha	Gilgit	35.915251°	74.257648°	Ishkein	Berberis stewartiana Jafri	Berberidaceae	root, leaves	1	Decoction	Shrub	1	0	0	0	0	0	0	0	0	0	0	0	0	0	0	0	0	0	0	0	0	0	0	0	0	0	0	0	0
Rahimabad	Gilgit	36.118837°	74.297376°	Ishkein	Berberis stewartiana Jafri	Berberidaceae	root, leaves	3	Decoction	Shrub	2	0	0	0	0	0	0	0	0	0	0	0	0	1	0	0	0	0	0	0	0	0	0	0	0	0	0	0	0
Rahimabad	Gilgit	36.118837°	74.297376°	Ishkein	Berberis stewartiana Jafri	Berberidaceae	root, leaves	2	Decoction	Shrub	1	0	0	0	0	0	0	0	0	0	0	0	0	1	0	0	0	0	0	0	0	0	0	0	0	0	0	0	0
Basho	Skardu	35.469494°	75.359156°	Shokurum	Berberis stewartiana Jafri	Berberidaceae	root, leaves	1	Decoction	Shrub	0	0	0	0	0	0	0	0	0	0	0	0	0	1	0	0	0	0	0	0	0	0	0	0	0	0	0	0	0
Hashupi	Skardu	35.485929°	75.696578°	Shokurum	Berberis stewartiana Jafri	Berberidaceae	root, leaves	2	Decoction	Shrub	1	0	0	0	0	0	0	0	0	0	0	0	0	1	0	0	0	0	0	0	0	0	0	0	0	0	0	0	0
Hashupi	Skardu	35.485929°	75.696578°	Shokurum	Berberis stewartiana Jafri	Berberidaceae	root, leaves	2	Decoction	Shrub	1	0	1	0	0	0	0	0	0	0	0	0	0	0	0	0	0	0	0	0	0	0	0	0	0	0	0	0	0
Hosho	Skardu	35.345214°	75.515283°	Shokurum	Berberis stewartiana Jafri	Berberidaceae	root, leaves	2	Decoction	Shrub	0	0	1	0	0	0	0	0	0	0	0	0	0	1	0	0	0	0	0	0	0	0	0	0	0	0	0	0	0
Thowar	Skardu	35.609167°	75.203611°	Shokurum	Berberis stewartiana Jafri	Berberidaceae	root, leaves	2	Decoction	Shrub	1	0	1	0	0	0	0	0	0	0	0	0	0	0	0	0	0	0	0	0	0	0	0	0	0	0	0	0	0
Thowar	Skardu	35.609167°	75.203611°	Shokurum	Berberis stewartiana Jafri	Berberidaceae	root, leaves	2	Decoction	Shrub	1	0	1	0	0	0	0	0	0	0	0	0	0	0	0	0	0	0	0	0	0	0	0	0	0	0	0	0	0
Kargha	Gilgit	35.915251°	74.257648°	Ishkein	Berberis ulicina Hook.f. & Thomson	Berberidaceae	root, leaves	2	Decoction	Shrub	1	0	1	0	0	0	0	0	0	0	0	0	0	0	0	0	0	0	0	0	0	0	0	0	0	0	0	0	0
Kargha	Gilgit	35.915251°	74.257648°	Ishkein	Berberis ulicina Hook.f. & Thomson	Berberidaceae	root, leaves	1	Decoction	Shrub	0	0	0	0	0	0	0	0	0	0	0	0	0	1	0	0	0	0	0	0	0	0	0	0	0	0	0	0	0
Kargha	Gilgit	35.915251°	74.257648°	Ishkein	Berberis ulicina Hook.f. & Thomson	Berberidaceae	root, leaves	2	Decoction	Shrub	1	0	1	0	0	0	0	0	0	0	0	0	0	0	0	0	0	0	0	0	0	0	0	0	0	0	0	0	0
Kargha	Gilgit	35.915251°	74.257648°	Ishkein	Berberis ulicina Hook.f. & Thomson	Berberidaceae	root, leaves	4	Decoction	Shrub	2	0	1	0	0	0	0	0	0	0	0	0	0	1	0	0	0	0	0	0	0	0	0	0	0	0	0	0	0
Kargha	Gilgit	35.915251°	74.257648°	Ishkein	Berberis ulicina Hook.f. & Thomson	Berberidaceae	root, leaves	2	Decoction	Shrub	1	0	1	0	0	0	0	0	0	0	0	0	0	0	0	0	0	0	0	0	0	0	0	0	0	0	0	0	0
Rahimabad	Gilgit	36.118837°	74.297376°	Ishkein	Berberis ulicina Hook.f. & Thomson	Berberidaceae	root, leaves	3	Decoction	Shrub	1	0	1	0	0	0	0	0	0	0	0	0	0	1	0	0	0	0	0	0	0	0	0	0	0	0	0	0	0
Rahimabad	Gilgit	36.118837°	74.297376°	Ishkein	Berberis ulicina Hook.f. & Thomson	Berberidaceae	root, leaves	2	Decoction	Shrub	2	0	0	0	0	0	0	0	0	0	0	0	0	0	0	0	0	0	0	0	0	0	0	0	0	0	0	0	0
Basho	Skardu	35.469494°	75.359156°	Shokurum	Berberis ulicina Hook.f. & Thomson	Berberidaceae	root, leaves	2	Decoction	Shrub	1	0	0	0	0	0	0	0	0	0	0	0	0	1	0	0	0	0	0	0	0	0	0	0	0	0	0	0	0
Basho	Skardu	35.469494°	75.359156°	Shokurum	Berberis ulicina Hook.f. & Thomson	Berberidaceae	root, leaves	2	Decoction	Shrub	1	0	0	0	0	0	0	0	0	0	0	0	0	1	0	0	0	0	0	0	0	0	0	0	0	0	0	0	0
Hashupi	Skardu	35.485929°	75.696578°	Shokurum	Berberis ulicina Hook.f. & Thomson	Berberidaceae	root, leaves	1	Decoction	Shrub	0	0	0	0	0	0	0	0	0	0	0	0	0	1	0	0	0	0	0	0	0	0	0	0	0	0	0	0	0
Hashupi	Skardu	35.485929°	75.696578°	Shokurum	Berberis ulicina Hook.f. & Thomson	Berberidaceae	root, leaves	1	Decoction	Shrub	0	0	0	0	0	0	0	0	0	0	0	0	0	1	0	0	0	0	0	0	0	0	0	0	0	0	0	0	0
Hashupi	Skardu	35.485929°	75.696578°	Shokurum	Berberis ulicina Hook.f. & Thomson	Berberidaceae	root, leaves	1	Decoction	Shrub	1	0	0	0	0	0	0	0	0	0	0	0	0	0	0	0	0	0	0	0	0	0	0	0	0	0	0	0	0
Hashupi	Skardu	35.485929°	75.696578°	Shokurum	Berberis ulicina Hook.f. & Thomson	Berberidaceae	root, leaves	2	Decoction	Shrub	1	0	0	0	0	0	0	0	0	0	0	0	0	1	0	0	0	0	0	0	0	0	0	0	0	0	0	0	0
Kargha	Gilgit	35.915251°	74.257648°	Ishkein	Berberis vulgaris L.	Berberidaceae	fruit, leaves	4	Decoction, direct	Shrub	1	0	0	0	0	0	0	2	0	0	0	0	0	0	0	0	1	0	0	0	0	0	0	0	0	0	0	0	0
Kargha	Gilgit	35.915251°	74.257648°	Ishkein	Berberis vulgaris L.	Berberidaceae	fruit, leaves	4	Decoction, direct	Shrub	1	0	0	0	0	0	0	2	0	0	0	0	0	0	0	0	1	0	0	0	0	0	0	0	0	0	0	0	0
Kargha	Gilgit	35.915251°	74.257648°	Ishkein	Berberis vulgaris L.	Berberidaceae	fruit, leaves	1	Decoction, direct	Shrub	1	0	0	0	0	0	0	0	0	0	0	0	0	0	0	0	0	0	0	0	0	0	0	0	0	0	0	0	0
Kargha	Gilgit	35.915251°	74.257648°	Ishkein	Berberis vulgaris L.	Berberidaceae	fruit, leaves	1	Decoction, direct	Shrub	0	0	0	0	0	0	0	1	0	0	0	0	0	0	0	0	0	0	0	0	0	0	0	0	0	0	0	0	0
Rahimabad	Gilgit	36.118837°	74.297376°	Ishkein	Berberis vulgaris L.	Berberidaceae	fruit, leaves	3	Decoction, direct	Shrub	0	0	0	0	0	0	0	2	0	0	0	0	0	0	0	0	1	0	0	0	0	0	0	0	0	0	0	0	0
Rahimabad	Gilgit	36.118837°	74.297376°	Ishkein	Berberis vulgaris L.	Berberidaceae	fruit, leaves	4	Decoction, direct	Shrub	1	0	0	0	0	0	0	2	0	0	0	0	0	0	0	0	1	0	0	0	0	0	0	0	0	0	0	0	0
Rahimabad	Gilgit	36.118837°	74.297376°	Ishkein	Berberis vulgaris L.	Berberidaceae	fruit, leaves	4	Decoction, direct	Shrub	1	0	0	0	0	0	0	2	0	0	0	0	0	0	0	0	1	0	0	0	0	0	0	0	0	0	0	0	0
Basho	Skardu	35.469494°	75.359156°	Shuturum	Berberis vulgaris L.	Berberidaceae	Fruit	4	Decoction, direct	Shrub	0	0	0	1	0	0	0	2	0	0	0	0	0	0	0	0	1	0	0	0	0	0	0	0	0	0	0	0	0
Basho	Skardu	35.469494°	75.359156°	Shuturum	Berberis vulgaris L.	Berberidaceae	Fruit	1	Decoction, direct	Shrub	0	0	0	0	0	0	0	1	0	0	0	0	0	0	0	0	0	0	0	0	0	0	0	0	0	0	0	0	0
Hashupi	Skardu	35.485929°	75.696578°	Shuturum	Berberis vulgaris L.	Berberidaceae	Fruit	3	Decoction, direct	Shrub	0	0	0	0	0	0	0	3	0	0	0	0	0	0	0	0	0	0	0	0	0	0	0	0	0	0	0	0	0
Hashupi	Skardu	35.485929°	75.696578°	Shuturum	Berberis vulgaris L.	Berberidaceae	Fruit	4	Decoction, direct	Shrub	0	0	0	1	0	0	0	3	0	0	0	0	0	0	0	0	0	0	0	0	0	0	0	0	0	0	0	0	0
Hosho	Skardu	35.345214°	75.515283°	Shuturum	Berberis vulgaris L.	Berberidaceae	Fruit	4	Decoction, direct	Shrub	0	0	0	1	0	0	0	3	0	0	0	0	0	0	0	0	0	0	0	0	0	0	0	0	0	0	0	0	0
Thowar	Skardu	35.609167°	75.203611°	Shuturum	Berberis vulgaris L.	Berberidaceae	Fruit	2	Decoction, direct	Shrub	0	0	0	0	0	0	0	2	0	0	0	0	0	0	0	0	0	0	0	0	0	0	0	0	0	0	0	0	0
Kargha	Gilgit	35.915251°	74.257648°	Shafus	Bergenia ciliata (Haw.) Sternb.	Saxifragaceae	leaves	7	Decoction, direct, powder/grinded	Herb	1	1	0	1	0	0	0	2	0	0	0	0	0	0	0	0	0	0	0	0	2	0	0	0	0	0	0	0	0
Kargha	Gilgit	35.915251°	74.257648°	Shafus	Bergenia ciliata (Haw.) Sternb.	Saxifragaceae	leaves	6	Decoction, direct, powder/grinded	Herb	1	1	0	0	0	0	0	2	1	0	0	0	0	0	0	0	0	0	0	0	1	0	0	0	0	0	0	0	0
Kargha	Gilgit	35.915251°	74.257648°	Shafus	Bergenia ciliata (Haw.) Sternb.	Saxifragaceae	leaves	2	Decoction, direct, powder/grinded	Herb	0	0	0	0	0	0	0	2	0	0	0	0	0	0	0	0	0	0	0	0	0	0	0	0	0	0	0	0	0
Kargha	Gilgit	35.915251°	74.257648°	Shafus	Bergenia ciliata (Haw.) Sternb.	Saxifragaceae	leaves	4	Decoction, direct, powder/grinded	Herb	1	1	0	1	0	0	0	0	0	0	0	0	0	0	0	0	0	0	0	0	1	0	0	0	0	0	0	0	0
Rahimabad	Gilgit	36.118837°	74.297376°	Shafus	Bergenia ciliata (Haw.) Sternb.	Saxifragaceae	leaves	4	Decoction, direct, powder/grinded	Herb	0	0	0	0	0	0	0	2	1	0	0	0	0	0	0	0	0	0	0	0	1	0	0	0	0	0	0	0	0
Rahimabad	Gilgit	36.118837°	74.297376°	Shafus	Bergenia ciliata (Haw.) Sternb.	Saxifragaceae	leaves	6	Decoction, direct, powder/grinded	Herb	1	1	0	1	0	0	0	0	1	0	0	0	0	0	0	0	0	0	0	0	2	0	0	0	0	0	0	0	0
Rahimabad	Gilgit	36.118837°	74.297376°	Shafus	Bergenia ciliata (Haw.) Sternb.	Saxifragaceae	leaves	4	Decoction, direct, powder/grinded	Herb	1	0	0	0	0	0	0	1	1	0	0	0	0	0	0	0	0	0	0	0	1	0	0	0	0	0	0	0	0
Basho	Skardu	35.469494°	75.359156°	Shaphus	Bergenia ciliata (Haw.) Sternb.	Saxifragaceae	leaves, seed	7	Decoction, direct, powder/grinded	Herb	1	1	0	1	0	0	0	2	1	0	0	0	0	0	0	0	0	0	0	0	1	0	0	0	0	0	0	0	0
Hashupi	Skardu	35.485929°	75.696578°	Shaphus	Bergenia ciliata (Haw.) Sternb.	Saxifragaceae	leaves, seed	7	Decoction, direct, powder/grinded	Herb	1	1	0	1	0	0	0	2	1	0	0	0	0	0	0	0	0	0	0	0	1	0	0	0	0	0	0	0	0
Hashupi	Skardu	35.485929°	75.696578°	Shaphus	Bergenia ciliata (Haw.) Sternb.	Saxifragaceae	leaves, seed	7	Decoction, direct, powder/grinded	Herb	1	1	0	1	0	0	0	2	1	0	0	0	0	0	0	0	0	0	0	0	1	0	0	0	0	0	0	0	0
Hashupi	Skardu	35.485929°	75.696578°	Shaphus	Bergenia ciliata (Haw.) Sternb.	Saxifragaceae	leaves, seed	7	Decoction, direct, powder/grinded	Herb	1	1	0	1	0	0	0	2	1	0	0	0	0	0	0	0	0	0	0	0	1	0	0	0	0	0	0	0	0
Hashupi	Skardu	35.485929°	75.696578°	Shaphus	Bergenia ciliata (Haw.) Sternb.	Saxifragaceae	leaves, seed	7	Decoction, direct, powder/grinded	Herb	1	1	0	1	0	0	0	2	1	0	0	0	0	0	0	0	0	0	0	0	1	0	0	0	0	0	0	0	0
Thowar	Skardu	35.609167°	75.203611°	Shaphus	Bergenia ciliata (Haw.) Sternb.	Saxifragaceae	leaves, seed	7	Decoction, direct, powder/grinded	Herb	1	1	0	1	0	0	0	2	1	0	0	0	0	0	0	0	0	0	0	0	1	0	0	0	0	0	0	0	0
Kargha	Gilgit	35.915251°	74.257648°	Sanspur	Bergenia himalacia Boriss.	Saxifragaceae	root	1	Decoction, powder/grinded	Herb	1	0	0	0	0	0	0	0	0	0	0	0	0	0	0	0	0	0	0	0	0	0	0	0	0	0	0	0	0
Kargha	Gilgit	35.915251°	74.257648°	Sanspur	Bergenia himalacia Boriss.	Saxifragaceae	root	3	Decoction, powder/grinded	Herb	1	0	2	0	0	0	0	0	0	0	0	0	0	0	0	0	0	0	0	0	0	0	0	0	0	0	0	0	0
Kargha	Gilgit	35.915251°	74.257648°	Sanspur	Bergenia himalacia Boriss.	Saxifragaceae	root	2	Decoction, powder/grinded	Herb	1	0	1	0	0	0	0	0	0	0	0	0	0	0	0	0	0	0	0	0	0	0	0	0	0	0	0	0	0
Kargha	Gilgit	35.915251°	74.257648°	Sanspur	Bergenia himalacia Boriss.	Saxifragaceae	root	2	Decoction, powder/grinded	Herb	1	0	1	0	0	0	0	0	0	0	0	0	0	0	0	0	0	0	0	0	0	0	0	0	0	0	0	0	0
Kargha	Gilgit	35.915251°	74.257648°	Sanspur	Bergenia himalacia Boriss.	Saxifragaceae	root	2	Decoction, powder/grinded	Herb	1	0	1	0	0	0	0	0	0	0	0	0	0	0	0	0	0	0	0	0	0	0	0	0	0	0	0	0	0
Rahimabad	Gilgit	36.118837°	74.297376°	Sanspur	Bergenia himalacia Boriss.	Saxifragaceae	root	2	Decoction, powder/grinded	Herb	1	0	1	0	0	0	0	0	0	0	0	0	0	0	0	0	0	0	0	0	0	0	0	0	0	0	0	0	0
Rahimabad	Gilgit	36.118837°	74.297376°	Sanspur	Bergenia himalacia Boriss.	Saxifragaceae	root	3	Decoction, powder/grinded	Herb	1	0	2	0	0	0	0	0	0	0	0	0	0	0	0	0	0	0	0	0	0	0	0	0	0	0	0	0	0
Gahkuch	Ghizer	36.162949°	73.755492°	Sanspar	Bergenia stracheyi (Hook.f. & Thomson) Engl.	Saxifragaceae	root, leaves	5	Infusion, powder/grinded, paste, direct	Herb	1	0	1	0	0	1	0	0	0	0	0	0	0	0	0	0	1	0	0	0	0	0	0	0	0	0	1	0	0
Gahkuch	Ghizer	36.162949°	73.755492°	Sanspar	Bergenia stracheyi (Hook.f. & Thomson) Engl.	Saxifragaceae	root, leaves	6	Infusion, powder/grinded, paste, direct	Herb	1	0	1	0	0	1	0	0	0	0	0	0	0	0	0	0	1	0	0	0	0	0	0	0	0	0	2	0	0
Gahkuch	Ghizer	36.162949°	73.755492°	Sanspar	Bergenia stracheyi (Hook.f. & Thomson) Engl.	Saxifragaceae	root, leaves	3	Infusion, paste, direct	Herb	1	0	1	0	0	0	0	0	0	0	0	0	0	0	0	0	0	0	0	0	0	0	0	0	0	0	1	0	0
Gahkuch	Ghizer	36.162949°	73.755492°	Sanspar	Bergenia stracheyi (Hook.f. & Thomson) Engl.	Saxifragaceae	root, leaves	4	Infusion, paste, direct	Herb	1	0	2	0	0	0	0	0	0	0	0	0	0	0	0	0	0	0	0	0	0	0	0	0	0	0	1	0	0
Yaseen	Ghizer	36.369354°	73.332552°	Sanspar	Bergenia stracheyi (Hook.f. & Thomson) Engl.	Saxifragaceae	root, leaves	5	Infusion, powder/grinded, paste, direct	Herb	1	0	1	0	0	1	0	0	0	0	0	0	0	0	0	0	1	0	0	0	0	0	0	0	0	0	1	0	0
Yaseen	Ghizer	36.369354°	73.332552°	Sanspar	Bergenia stracheyi (Hook.f. & Thomson) Engl.	Saxifragaceae	root, leaves	7	Infusion, powder/grinded, paste, direct	Herb	1	0	2	0	0	1	0	0	0	0	0	0	0	0	0	0	1	0	0	0	0	0	0	0	0	0	2	0	0
Yaseen	Ghizer	36.369354°	73.332552°	Sanspar	Bergenia stracheyi (Hook.f. & Thomson) Engl.	Saxifragaceae	root, leaves	5	Infusion, powder/grinded, paste, direct	Herb	1	0	2	0	0	1	0	0	0	0	0	0	0	0	0	0	0	0	0	0	0	0	0	0	0	0	1	0	0
Aliabad	Hunza	36.308563°	74.619496°	Sasper	Bergenia stracheyi (Hook.f. & Thomson) Engl.	Saxifragaceae	root	2	paste, direct	Herb	1	0	0	0	0	0	0	0	0	0	0	0	0	0	0	0	0	0	0	0	0	0	1	0	0	0	0	0	0
Aliabad	Hunza	36.308563°	74.619496°	Sasper	Bergenia stracheyi (Hook.f. & Thomson) Engl.	Saxifragaceae	leaves, root	3	Infusion, powder/grinded, paste, direct	Herb	1	0	1	0	0	0	0	0	0	0	0	0	0	0	0	0	0	0	0	0	0	0	1	0	0	0	0	0	0
Altit	Hunza	36.316102°	74.681835°	Sasper	Bergenia stracheyi (Hook.f. & Thomson) Engl.	Saxifragaceae	leaves, root	3	Infusion, paste, direct	Herb	1	0	1	0	0	0	0	0	0	0	0	0	0	0	0	0	0	0	0	0	0	0	1	0	0	0	0	0	0
Altit	Hunza	36.316102°	74.681835°	Sasper	Bergenia stracheyi (Hook.f. & Thomson) Engl.	Saxifragaceae	leaves, root	3	Infusion, paste, direct	Herb	1	0	1	0	0	0	0	0	0	0	0	0	0	0	0	0	0	0	0	0	0	0	1	0	0	0	0	0	0
Altit	Hunza	36.316102°	74.681835°	Sasper	Bergenia stracheyi (Hook.f. & Thomson) Engl.	Saxifragaceae	root	2	Infusion, powder/grinded, paste, direct	Herb	1	0	0	0	0	0	0	0	0	0	0	0	0	0	0	0	0	0	0	0	0	0	1	0	0	0	0	0	0
Altit	Hunza	36.316102°	74.681835°	Sasper	Bergenia stracheyi (Hook.f. & Thomson) Engl.	Saxifragaceae	root	2	Infusion, powder/grinded, paste, direct	Herb	1	0	0	0	0	0	0	0	0	0	0	0	0	0	0	0	0	0	0	0	0	0	1	0	0	0	0	0	0
Altit	Hunza	36.316102°	74.681835°	Sasper	Bergenia stracheyi (Hook.f. & Thomson) Engl.	Saxifragaceae	root	2	Infusion, powder/grinded, paste, direct	Herb	1	0	0	0	0	0	0	0	0	0	0	0	0	0	0	0	0	0	0	0	0	0	1	0	0	0	0	0	0
Karimabad	Hunza	36.326408°	74.664316°	Sasper	Bergenia stracheyi (Hook.f. & Thomson) Engl.	Saxifragaceae	root	2	Infusion, paste, direct	Herb	1	0	0	0	0	0	0	0	0	0	0	0	0	0	0	0	0	0	0	0	0	0	1	0	0	0	0	0	0
Karimabad	Hunza	36.326408°	74.664316°	Sasper	Bergenia stracheyi (Hook.f. & Thomson) Engl.	Saxifragaceae	leaves, root	3	Infusion, powder/grinded, paste, direct	Herb	1	0	1	0	0	0	0	0	0	0	0	0	0	0	0	0	0	0	0	0	0	0	1	0	0	0	0	0	0
Karimabad	Hunza	36.326408°	74.664316°	Sasper	Bergenia stracheyi (Hook.f. & Thomson) Engl.	Saxifragaceae	root	2	Infusion, paste, direct	Herb	1	0	0	0	0	0	0	0	0	0	0	0	0	0	0	0	0	0	0	0	0	0	1	0	0	0	0	0	0
Murtazaabad	Hunza	36.285517°	74.607833°	Sasper	Bergenia stracheyi (Hook.f. & Thomson) Engl.	Saxifragaceae	root	2	Infusion, paste, direct	Herb	1	0	0	0	0	0	0	0	0	0	0	0	0	0	0	0	0	0	0	0	0	0	1	0	0	0	0	0	0
Murtazaabad	Hunza	36.285517°	74.607833°	Sasper	Bergenia stracheyi (Hook.f. & Thomson) Engl.	Saxifragaceae	leaves, root	3	Infusion, powder/grinded, paste, direct	Herb	1	0	1	0	0	0	0	0	0	0	0	0	0	0	0	0	0	0	0	0	0	0	1	0	0	0	0	0	0
Murtazaabad	Hunza	36.285517°	74.607833°	Sasper	Bergenia stracheyi (Hook.f. & Thomson) Engl.	Saxifragaceae	leaves, root	2	Infusion, powder/grinded, paste, direct	Herb	0	0	1	0	0	0	0	0	0	0	0	0	0	0	0	0	0	0	0	0	0	0	1	0	0	0	0	0	0
Murtazaabad	Hunza	36.285517°	74.607833°	Sasper	Bergenia stracheyi (Hook.f. & Thomson) Engl.	Saxifragaceae	leaves, root	3	Infusion, powder/grinded, paste, direct	Herb	1	0	1	0	0	0	0	0	0	0	0	0	0	0	0	0	0	0	0	0	0	0	1	0	0	0	0	0	0
Ghulmit	Nagar	36.241766°	74.462110°	Sasper	Bergenia stracheyi (Hook.f. & Thomson) Engl.	Saxifragaceae	root	4	Infusion, powder/grinded, paste, direct	Herb	1	0	0	0	0	0	0	1	0	0	0	0	0	0	1	0	0	0	0	0	0	0	1	0	0	0	0	0	0
Ghulmit	Nagar	36.241766°	74.462110°	Sasper	Bergenia stracheyi (Hook.f. & Thomson) Engl.	Saxifragaceae	root	3	paste, direct	Herb	1	0	0	0	0	0	0	1	0	0	0	0	0	0	0	0	0	0	0	0	0	0	1	0	0	0	0	0	0
Minapin	Nagar	36.250922°	74.536075°	Sasper	Bergenia stracheyi (Hook.f. & Thomson) Engl.	Saxifragaceae	leaves, root	4	Infusion, powder/grinded, paste, direct	Herb	1	0	1	0	0	0	0	1	0	0	0	0	0	0	0	0	0	0	0	0	0	0	1	0	0	0	0	0	0
Minapin	Nagar	36.250922°	74.536075°	Sasper	Bergenia stracheyi (Hook.f. & Thomson) Engl.	Saxifragaceae	leaves, root	5	Infusion, paste, direct	Herb	1	0	1	0	0	0	0	1	0	0	0	0	0	0	1	0	0	0	0	0	0	0	1	0	0	0	0	0	0
Nagar Khas	Nagar	36.276377°	74.719955°	Sasper	Bergenia stracheyi (Hook.f. & Thomson) Engl.	Saxifragaceae	root	3	Infusion, paste, direct	Herb	0	0	0	0	0	0	0	1	0	0	0	0	0	0	1	0	0	0	0	0	0	0	1	0	0	0	0	0	0
Phekar	Nagar	36.263297°	74.594568°	Sasper	Bergenia stracheyi (Hook.f. & Thomson) Engl.	Saxifragaceae	root	2	paste, direct	Herb	1	0	0	0	0	0	0	0	0	0	0	0	0	0	0	0	0	0	0	0	0	0	1	0	0	0	0	0	0
Phekar	Nagar	36.263297°	74.594568°	Sasper	Bergenia stracheyi (Hook.f. & Thomson) Engl.	Saxifragaceae	leaves, root	4	Infusion, powder/grinded	Herb	1	0	1	0	0	0	0	0	0	0	0	0	0	0	1	0	0	0	0	0	0	0	1	0	0	0	0	0	0
Phekar	Nagar	36.263297°	74.594568°	Sasper	Bergenia stracheyi (Hook.f. & Thomson) Engl.	Saxifragaceae	root	2	Infusion, powder/grinded, paste, direct	Herb	0	0	0	0	0	0	0	1	0	0	0	0	0	0	0	0	0	0	0	0	0	0	1	0	0	0	0	0	0
Phekar	Nagar	36.263297°	74.594568°	Sasper	Bergenia stracheyi (Hook.f. & Thomson) Engl.	Saxifragaceae	leaves, root	3	paste, direct	Herb	1	0	1	0	0	0	0	0	0	0	0	0	0	0	0	0	0	0	0	0	0	0	1	0	0	0	0	0	0
Basho	Skardu	35.469494°	75.359156°	Khichlay	Bergenia stracheyi (Hook.f. & Thomson) Engl.	Saxifragaceae	leaves, root	5	Infusion, powder/grinded, paste	Herb	2	0	0	0	0	0	0	1	0	0	0	0	0	0	0	0	0	0	0	0	1	0	0	1	0	0	0	0	0
Basho	Skardu	35.469494°	75.359156°	Khichlay	Bergenia stracheyi (Hook.f. & Thomson) Engl.	Saxifragaceae	leaves, root	4	Infusion, paste, direct	Herb	1	0	0	1	0	0	0	1	0	0	0	0	0	0	0	0	0	0	0	0	0	0	0	1	0	0	0	0	0
Basho	Skardu	35.469494°	75.359156°	Khichlay	Bergenia stracheyi (Hook.f. & Thomson) Engl.	Saxifragaceae	leaves, root	4	Infusion, powder/grinded, paste	Herb	2	0	0	0	0	0	0	1	0	0	0	0	0	0	0	0	0	0	0	0	1	0	0	0	0	0	0	0	0
Hashupi	Skardu	35.485929°	75.696578°	Khichlay	Bergenia stracheyi (Hook.f. & Thomson) Engl.	Saxifragaceae	leaves, root	4	Infusion, powder/grinded, paste	Herb	2	0	0	1	0	0	0	0	0	0	0	0	0	0	0	0	0	0	0	0	0	0	0	1	0	0	0	0	0
Hashupi	Skardu	35.485929°	75.696578°	Khichlay	Bergenia stracheyi (Hook.f. & Thomson) Engl.	Saxifragaceae	leaves, root	3	Infusion, paste, direct	Herb	1	0	0	1	0	0	0	0	0	0	0	0	0	0	0	0	0	0	0	0	0	0	0	1	0	0	0	0	0
Hosho	Skardu	35.345214°	75.515283°	Khichlay	Bergenia stracheyi (Hook.f. & Thomson) Engl.	Saxifragaceae	leaves, root	3	Infusion, paste, direct	Herb	1	0	0	1	0	0	0	0	0	0	0	0	0	0	0	0	0	0	0	0	1	0	0	0	0	0	0	0	0
Thowar	Skardu	35.609167°	75.203611°	Khichlay	Bergenia stracheyi (Hook.f. & Thomson) Engl.	Saxifragaceae	leaves, root	2	paste, direct	Herb	0	0	0	0	0	0	0	1	0	0	0	0	0	0	0	0	0	0	0	0	1	0	0	0	0	0	0	0	0
Bilchar/Bagrote	Gilgit	35.942517°	74.545274°	Jowzee	Betula utilis D.Don	Betulaceae	bark, wood	2	Decoction, direct	Tree	1	0	1	0	0	0	0	0	0	0	0	0	0	0	0	0	0	0	0	0	0	0	0	0	0	0	0	0	0
Bilchar/Bagrote	Gilgit	35.942517°	74.545274°	Jowzee	Betula utilis D.Don	Betulaceae	bark, wood	2	Decoction, direct	Tree	0	0	2	0	0	0	0	0	0	0	0	0	0	0	0	0	0	0	0	0	0	0	0	0	0	0	0	0	0
Bilchar/Bagrote	Gilgit	35.942517°	74.545274°	Jowzee	Betula utilis D.Don	Betulaceae	bark, wood	3	Decoction, direct	Tree	1	0	2	0	0	0	0	0	0	0	0	0	0	0	0	0	0	0	0	0	0	0	0	0	0	0	0	0	0
Bilchar/Bagrote	Gilgit	35.942517°	74.545274°	Jowzee	Betula utilis D.Don	Betulaceae	bark, wood	3	Decoction, direct	Tree	1	0	2	0	0	0	0	0	0	0	0	0	0	0	0	0	0	0	0	0	0	0	0	0	0	0	0	0	0
Danyore	Gilgit	35.919880°	74.386181°	Jowzee	Betula utilis D.Don	Betulaceae	bark, wood	2	Decoction, direct	Tree	1	0	1	0	0	0	0	0	0	0	0	0	0	0	0	0	0	0	0	0	0	0	0	0	0	0	0	0	0
Danyore	Gilgit	35.919880°	74.386181°	Jowzee	Betula utilis D.Don	Betulaceae	bark, wood	2	Decoction, direct	Tree	1	0	1	0	0	0	0	0	0	0	0	0	0	0	0	0	0	0	0	0	0	0	0	0	0	0	0	0	0
Danyore	Gilgit	35.919880°	74.386181°	Jowzee	Betula utilis D.Don	Betulaceae	bark, wood	2	Decoction, direct	Tree	0	0	2	0	0	0	0	0	0	0	0	0	0	0	0	0	0	0	0	0	0	0	0	0	0	0	0	0	0
Danyore	Gilgit	35.919880°	74.386181°	Jowzee	Betula utilis D.Don	Betulaceae	bark, wood	3	Decoction, direct	Tree	1	0	2	0	0	0	0	0	0	0	0	0	0	0	0	0	0	0	0	0	0	0	0	0	0	0	0	0	0
Jalalabad	Gilgit	35.880457°	74.493590°	Jowzee	Betula utilis D.Don	Betulaceae	bark, wood	3	Decoction, direct	Tree	1	0	2	0	0	0	0	0	0	0	0	0	0	0	0	0	0	0	0	0	0	0	0	0	0	0	0	0	0
Jalalabad	Gilgit	35.880457°	74.493590°	Jowzee	Betula utilis D.Don	Betulaceae	bark, wood	2	Decoction, direct	Tree	0	0	2	0	0	0	0	0	0	0	0	0	0	0	0	0	0	0	0	0	0	0	0	0	0	0	0	0	0
Jalalabad	Gilgit	35.880457°	74.493590°	Jowzee	Betula utilis D.Don	Betulaceae	bark, wood	3	Decoction, direct	Tree	1	0	2	0	0	0	0	0	0	0	0	0	0	0	0	0	0	0	0	0	0	0	0	0	0	0	0	0	0
Jalalabad	Gilgit	35.880457°	74.493590°	Jowzee	Betula utilis D.Don	Betulaceae	bark, wood	3	Decoction, direct	Tree	1	0	2	0	0	0	0	0	0	0	0	0	0	0	0	0	0	0	0	0	0	0	0	0	0	0	0	0	0
Jalalabad	Gilgit	35.880457°	74.493590°	Jowzee	Betula utilis D.Don	Betulaceae	bark, wood	3	Decoction, direct	Tree	1	0	2	0	0	0	0	0	0	0	0	0	0	0	0	0	0	0	0	0	0	0	0	0	0	0	0	0	0
Kargha	Gilgit	35.915251°	74.257648°	Staqpa	Betula utilis D.Don	Betulaceae	bark	3	Decoction, direct	Tree	2	0	1	0	0	0	0	0	0	0	0	0	0	0	0	0	0	0	0	0	0	0	0	0	0	0	0	0	0
Kargha	Gilgit	35.915251°	74.257648°	Staqpa	Betula utilis D.Don	Betulaceae	bark	3	Decoction, direct	Tree	2	0	1	0	0	0	0	0	0	0	0	0	0	0	0	0	0	0	0	0	0	0	0	0	0	0	0	0	0
Kargha	Gilgit	35.915251°	74.257648°	Staqpa	Betula utilis D.Don	Betulaceae	bark	3	Decoction, direct	Tree	2	0	1	0	0	0	0	0	0	0	0	0	0	0	0	0	0	0	0	0	0	0	0	0	0	0	0	0	0
Kargha	Gilgit	35.915251°	74.257648°	Staqpa	Betula utilis D.Don	Betulaceae	bark	3	Decoction, direct	Tree	2	0	1	0	0	0	0	0	0	0	0	0	0	0	0	0	0	0	0	0	0	0	0	0	0	0	0	0	0
Kargha	Gilgit	35.915251°	74.257648°	Staqpa	Betula utilis D.Don	Betulaceae	bark	3	Decoction, direct	Tree	2	0	1	0	0	0	0	0	0	0	0	0	0	0	0	0	0	0	0	0	0	0	0	0	0	0	0	0	0
Kargha	Gilgit	35.915251°	74.257648°	Halli	Betula utilis D.Don	Betulaceae	Bark	2	Decoction, direct	Tree	0	0	0	0	0	2	0	0	0	0	0	0	0	0	0	0	0	0	0	0	0	0	0	0	0	0	0	0	0
Kargha	Gilgit	35.915251°	74.257648°	Halli	Betula utilis D.Don	Betulaceae	Bark	2	Decoction, direct	Tree	0	0	0	0	0	2	0	0	0	0	0	0	0	0	0	0	0	0	0	0	0	0	0	0	0	0	0	0	0
Kargha	Gilgit	35.915251°	74.257648°	Halli	Betula utilis D.Don	Betulaceae	Bark	2	Decoction, direct	Tree	0	0	0	0	0	2	0	0	0	0	0	0	0	0	0	0	0	0	0	0	0	0	0	0	0	0	0	0	0
Rahimabad	Gilgit	36.118837°	74.297376°	Staqpa	Betula utilis D.Don	Betulaceae	bark	3	Decoction, direct	Tree	2	0	1	0	0	0	0	0	0	0	0	0	0	0	0	0	0	0	0	0	0	0	0	0	0	0	0	0	0
Rahimabad	Gilgit	36.118837°	74.297376°	Halli	Betula utilis D.Don	Betulaceae	Bark	2	Decoction, direct	Tree	0	0	0	0	0	2	0	0	0	0	0	0	0	0	0	0	0	0	0	0	0	0	0	0	0	0	0	0	0
Rahimabad	Gilgit	36.118837°	74.297376°	Halli	Betula utilis D.Don	Betulaceae	Bark	2	Decoction, direct	Tree	0	0	0	0	0	2	0	0	0	0	0	0	0	0	0	0	0	0	0	0	0	0	0	0	0	0	0	0	0
Rahimabad	Gilgit	36.118837°	74.297376°	Halli	Betula utilis D.Don	Betulaceae	Bark	2	Decoction, direct	Tree	0	0	0	0	0	2	0	0	0	0	0	0	0	0	0	0	0	0	0	0	0	0	0	0	0	0	0	0	0
Aliabad	Hunza	36.308563°	74.619496°	Xuxi	Betula utilis D.Don	Betulaceae	bark, wood	3	Decoction, direct	Tree	1	0	2	0	0	0	0	0	0	0	0	0	0	0	0	0	0	0	0	0	0	0	0	0	0	0	0	0	0
Aliabad	Hunza	36.308563°	74.619496°	Xuxi	Betula utilis D.Don	Betulaceae	bark, wood	3	Decoction, direct	Tree	1	0	2	0	0	0	0	0	0	0	0	0	0	0	0	0	0	0	0	0	0	0	0	0	0	0	0	0	0
Aliabad	Hunza	36.308563°	74.619496°	Xuxi	Betula utilis D.Don	Betulaceae	bark, wood	3	Decoction, direct	Tree	1	0	2	0	0	0	0	0	0	0	0	0	0	0	0	0	0	0	0	0	0	0	0	0	0	0	0	0	0
Aliabad	Hunza	36.308563°	74.619496°	Xuxi	Betula utilis D.Don	Betulaceae	bark, wood	3	Decoction, direct	Tree	1	0	2	0	0	0	0	0	0	0	0	0	0	0	0	0	0	0	0	0	0	0	0	0	0	0	0	0	0
Altit	Hunza	36.316102°	74.681835°	Xuxi	Betula utilis D.Don	Betulaceae	bark, wood	3	Decoction, direct	Tree	1	0	2	0	0	0	0	0	0	0	0	0	0	0	0	0	0	0	0	0	0	0	0	0	0	0	0	0	0
Ghulkin	Hunza	36.407318°	74.863984°	Furze	Betula utilis D.Don	Betulaceae	bark	2	Decoction, direct	Tree	0	0	0	0	0	2	0	0	0	0	0	0	0	0	0	0	0	0	0	0	0	0	0	0	0	0	0	0	0
Ghulkin	Hunza	36.407318°	74.863984°	Furze	Betula utilis D.Don	Betulaceae	bark	2	Decoction, direct	Tree	0	0	0	0	0	2	0	0	0	0	0	0	0	0	0	0	0	0	0	0	0	0	0	0	0	0	0	0	0
Ghulkin	Hunza	36.407318°	74.863984°	Furze	Betula utilis D.Don	Betulaceae	bark	2	Decoction, direct	Tree	0	0	0	0	0	2	0	0	0	0	0	0	0	0	0	0	0	0	0	0	0	0	0	0	0	0	0	0	0
Ghulkin	Hunza	36.407318°	74.863984°	Furze	Betula utilis D.Don	Betulaceae	bark	2	Decoction, direct	Tree	0	0	0	0	0	2	0	0	0	0	0	0	0	0	0	0	0	0	0	0	0	0	0	0	0	0	0	0	0
Ghulkin	Hunza	36.407318°	74.863984°	Furze	Betula utilis D.Don	Betulaceae	bark	2	Decoction, direct	Tree	0	0	0	0	0	2	0	0	0	0	0	0	0	0	0	0	0	0	0	0	0	0	0	0	0	0	0	0	0
Karimabad	Hunza	36.326408°	74.664316°	Xuxi	Betula utilis D.Don	Betulaceae	bark, wood	3	Decoction, direct	Tree	1	0	2	0	0	0	0	0	0	0	0	0	0	0	0	0	0	0	0	0	0	0	0	0	0	0	0	0	0
Murtazaabad	Hunza	36.285517°	74.607833°	Xuxi	Betula utilis D.Don	Betulaceae	bark, wood	3	Decoction, direct	Tree	1	0	2	0	0	0	0	0	0	0	0	0	0	0	0	0	0	0	0	0	0	0	0	0	0	0	0	0	0
Shimshal	Hunza	36.436464°	75.313109°	Furze	Betula utilis D.Don	Betulaceae	bark	2	Decoction, direct	Tree	0	0	0	0	0	2	0	0	0	0	0	0	0	0	0	0	0	0	0	0	0	0	0	0	0	0	0	0	0
Shimshal	Hunza	36.436464°	75.313109°	Furze	Betula utilis D.Don	Betulaceae	bark	2	Decoction, direct	Tree	0	0	0	0	0	2	0	0	0	0	0	0	0	0	0	0	0	0	0	0	0	0	0	0	0	0	0	0	0
Ghulmit	Nagar	36.241766°	74.462110°	Xuxi/Halli/Jowzee/Furze	Betula utilis D.Don	Betulaceae	bark, wood	2	Decoction, direct	Tree	1	0	1	0	0	0	0	0	0	0	0	0	0	0	0	0	0	0	0	0	0	0	0	0	0	0	0	0	0
Ghulmit	Nagar	36.241766°	74.462110°	Xuxi/Halli/Jowzee/Furze	Betula utilis D.Don	Betulaceae	bark	3	Decoction, direct	Tree	2	0	0	0	0	1	0	0	0	0	0	0	0	0	0	0	0	0	0	0	0	0	0	0	0	0	0	0	0
Ghulmit	Nagar	36.241766°	74.462110°	Xuxi/Halli/Jowzee/Furze	Betula utilis D.Don	Betulaceae	bark, wood	3	Decoction, direct	Tree	1	0	1	0	0	1	0	0	0	0	0	0	0	0	0	0	0	0	0	0	0	0	0	0	0	0	0	0	0
Ghulmit	Nagar	36.241766°	74.462110°	Xuxi/Halli/Jowzee/Furze	Betula utilis D.Don	Betulaceae	bark	2	Decoction, direct	Tree	2	0	0	0	0	0	0	0	0	0	0	0	0	0	0	0	0	0	0	0	0	0	0	0	0	0	0	0	0
Ghulmit	Nagar	36.241766°	74.462110°	Xuxi/Halli/Jowzee/Furze	Betula utilis D.Don	Betulaceae	bark, wood	3	Decoction, direct	Tree	1	0	1	0	0	1	0	0	0	0	0	0	0	0	0	0	0	0	0	0	0	0	0	0	0	0	0	0	0
Minapin	Nagar	36.250922°	74.536075°	Xuxi/Halli/Jowzee/Furze	Betula utilis D.Don	Betulaceae	Bark	1	Decoction, direct	Tree	0	0	0	0	0	1	0	0	0	0	0	0	0	0	0	0	0	0	0	0	0	0	0	0	0	0	0	0	0
Minapin	Nagar	36.250922°	74.536075°	Xuxi/Halli/Jowzee/Furze	Betula utilis D.Don	Betulaceae	bark	2	Decoction, direct	Tree	2	0	0	0	0	0	0	0	0	0	0	0	0	0	0	0	0	0	0	0	0	0	0	0	0	0	0	0	0
Minapin	Nagar	36.250922°	74.536075°	Xuxi/Halli/Jowzee/Furze	Betula utilis D.Don	Betulaceae	Bark	2	Decoction, direct	Tree	1	0	0	0	0	1	0	0	0	0	0	0	0	0	0	0	0	0	0	0	0	0	0	0	0	0	0	0	0
Minapin	Nagar	36.250922°	74.536075°	Xuxi/Halli/Jowzee/Furze	Betula utilis D.Don	Betulaceae	bark	3	Decoction, direct	Tree	2	0	0	0	0	1	0	0	0	0	0	0	0	0	0	0	0	0	0	0	0	0	0	0	0	0	0	0	0
Nagar Khas	Nagar	36.276377°	74.719955°	Xuxi/Halli/Jowzee/Furze	Betula utilis D.Don	Betulaceae	bark, wood	3	Decoction, direct	Tree	1	0	1	0	0	1	0	0	0	0	0	0	0	0	0	0	0	0	0	0	0	0	0	0	0	0	0	0	0
Nagar Khas	Nagar	36.276377°	74.719955°	Xuxi/Halli/Jowzee/Furze	Betula utilis D.Don	Betulaceae	bark, wood	2	Decoction, direct	Tree	1	0	1	0	0	0	0	0	0	0	0	0	0	0	0	0	0	0	0	0	0	0	0	0	0	0	0	0	0
Phekar	Nagar	36.263297°	74.594568°	Xuxi/Halli/Jowzee/Furze	Betula utilis D.Don	Betulaceae	bark	1	Decoction, direct	Tree	0	0	0	0	0	1	0	0	0	0	0	0	0	0	0	0	0	0	0	0	0	0	0	0	0	0	0	0	0
Phekar	Nagar	36.263297°	74.594568°	Xuxi/Halli/Jowzee/Furze	Betula utilis D.Don	Betulaceae	bark, wood	2	Decoction, direct	Tree	1	0	1	0	0	0	0	0	0	0	0	0	0	0	0	0	0	0	0	0	0	0	0	0	0	0	0	0	0
Phekar	Nagar	36.263297°	74.594568°	Xuxi/Halli/Jowzee/Furze	Betula utilis D.Don	Betulaceae	bark	2	Decoction, direct	Tree	1	0	0	0	0	1	0	0	0	0	0	0	0	0	0	0	0	0	0	0	0	0	0	0	0	0	0	0	0
Phekar	Nagar	36.263297°	74.594568°	Xuxi/Halli/Jowzee/Furze	Betula utilis D.Don	Betulaceae	bark, wood	3	Decoction, direct	Tree	1	0	1	0	0	1	0	0	0	0	0	0	0	0	0	0	0	0	0	0	0	0	0	0	0	0	0	0	0
Basho	Skardu	35.469494°	75.359156°	Staqpa	Betula utilis D.Don	Betulaceae	bark	1	Decoction, direct	Tree	0	0	1	0	0	0	0	0	0	0	0	0	0	0	0	0	0	0	0	0	0	0	0	0	0	0	0	0	0
Hashupi	Skardu	35.485929°	75.696578°	Staqpa	Betula utilis D.Don	Betulaceae	bark	2	Decoction, direct	Tree	2	0	0	0	0	0	0	0	0	0	0	0	0	0	0	0	0	0	0	0	0	0	0	0	0	0	0	0	0
Hashupi	Skardu	35.485929°	75.696578°	Staqpa	Betula utilis D.Don	Betulaceae	bark	2	Decoction, direct	Tree	2	0	0	0	0	0	0	0	0	0	0	0	0	0	0	0	0	0	0	0	0	0	0	0	0	0	0	0	0
Hashupi	Skardu	35.485929°	75.696578°	Staqpa	Betula utilis D.Don	Betulaceae	bark	2	Decoction, direct	Tree	2	0	0	0	0	0	0	0	0	0	0	0	0	0	0	0	0	0	0	0	0	0	0	0	0	0	0	0	0
Hashupi	Skardu	35.485929°	75.696578°	Staqpa	Betula utilis D.Don	Betulaceae	bark	2	Decoction, direct	Tree	1	0	1	0	0	0	0	0	0	0	0	0	0	0	0	0	0	0	0	0	0	0	0	0	0	0	0	0	0
Thowar	Skardu	35.609167°	75.203611°	Staqpa	Betula utilis D.Don	Betulaceae	bark	2	Decoction, direct	Tree	1	0	1	0	0	0	0	0	0	0	0	0	0	0	0	0	0	0	0	0	0	0	0	0	0	0	0	0	0
Kargha	Gilgit	35.915251°	74.257648°	Buma	Bistorta affinis (D.Don) Greene	Polygonaceae	leaves	1	Powder/grinded	Grass	0	0	0	0	0	0	0	1	0	0	0	0	0	0	0	0	0	0	0	0	0	0	0	0	0	0	0	0	0
Kargha	Gilgit	35.915251°	74.257648°	Buma	Bistorta affinis (D.Don) Greene	Polygonaceae	leaves	1	Powder/grinded	Grass	0	0	0	0	0	0	0	1	0	0	0	0	0	0	0	0	0	0	0	0	0	0	0	0	0	0	0	0	0
Kargha	Gilgit	35.915251°	74.257648°	Buma	Bistorta affinis (D.Don) Greene	Polygonaceae	leaves	1	Powder/grinded	Grass	0	0	0	0	0	0	0	1	0	0	0	0	0	0	0	0	0	0	0	0	0	0	0	0	0	0	0	0	0
Kargha	Gilgit	35.915251°	74.257648°	Buma	Bistorta affinis (D.Don) Greene	Polygonaceae	leaves	1	Powder/grinded	Grass	0	0	0	0	0	0	0	1	0	0	0	0	0	0	0	0	0	0	0	0	0	0	0	0	0	0	0	0	0
Kargha	Gilgit	35.915251°	74.257648°	Buma	Bistorta affinis (D.Don) Greene	Polygonaceae	leaves	1	Powder/grinded	Grass	0	0	0	0	0	0	0	1	0	0	0	0	0	0	0	0	0	0	0	0	0	0	0	0	0	0	0	0	0
Rahimabad	Gilgit	36.118837°	74.297376°	Buma	Bistorta affinis (D.Don) Greene	Polygonaceae	leaves	1	Powder/grinded	Grass	0	0	0	0	0	0	0	1	0	0	0	0	0	0	0	0	0	0	0	0	0	0	0	0	0	0	0	0	0
Rahimabad	Gilgit	36.118837°	74.297376°	Buma	Bistorta affinis (D.Don) Greene	Polygonaceae	leaves	1	Powder/grinded	Grass	0	0	0	0	0	0	0	1	0	0	0	0	0	0	0	0	0	0	0	0	0	0	0	0	0	0	0	0	0
Basho	Skardu	35.469494°	75.359156°	Buma	Bistorta affinis (D.Don) Greene	Polygonaceae	leaves	1	Powder/grinded	Grass	0	0	0	0	0	0	0	1	0	0	0	0	0	0	0	0	0	0	0	0	0	0	0	0	0	0	0	0	0
Basho	Skardu	35.469494°	75.359156°	Buma	Bistorta affinis (D.Don) Greene	Polygonaceae	leaves	1	Powder/grinded	Grass	0	0	0	0	0	0	0	1	0	0	0	0	0	0	0	0	0	0	0	0	0	0	0	0	0	0	0	0	0
Basho	Skardu	35.469494°	75.359156°	Buma	Bistorta affinis (D.Don) Greene	Polygonaceae	leaves	1	Powder/grinded	Grass	0	0	0	0	0	0	0	1	0	0	0	0	0	0	0	0	0	0	0	0	0	0	0	0	0	0	0	0	0
Hashupi	Skardu	35.485929°	75.696578°	Buma	Bistorta affinis (D.Don) Greene	Polygonaceae	leaves	1	Powder/grinded	Grass	0	0	0	0	0	0	0	1	0	0	0	0	0	0	0	0	0	0	0	0	0	0	0	0	0	0	0	0	0
Hashupi	Skardu	35.485929°	75.696578°	Buma	Bistorta affinis (D.Don) Greene	Polygonaceae	leaves	1	Powder/grinded	Grass	0	0	0	0	0	0	0	1	0	0	0	0	0	0	0	0	0	0	0	0	0	0	0	0	0	0	0	0	0
Hosho	Skardu	35.345214°	75.515283°	Buma	Bistorta affinis (D.Don) Greene	Polygonaceae	leaves	1	Powder/grinded	Grass	0	0	0	0	0	0	0	1	0	0	0	0	0	0	0	0	0	0	0	0	0	0	0	0	0	0	0	0	0
Thowar	Skardu	35.609167°	75.203611°	Buma	Bistorta affinis (D.Don) Greene	Polygonaceae	leaves	1	Powder/grinded	Grass	0	0	0	0	0	0	0	1	0	0	0	0	0	0	0	0	0	0	0	0	0	0	0	0	0	0	0	0	0
Basho	Skardu	35.469494°	75.359156°	Onbu	Bistorta amplexicaulis (D.Don) Greene	Polygonaceae	root	3	Powder/grinded, decoction, infusion	Herb	0	0	0	0	0	0	0	0	1	0	0	0	0	0	0	0	1	0	0	0	0	0	0	1	0	0	0	0	0
Basho	Skardu	35.469494°	75.359156°	Onbu	Bistorta amplexicaulis (D.Don) Greene	Polygonaceae	root	2	Powder/grinded, decoction, infusion	Herb	0	0	0	0	0	0	0	0	0	0	0	0	0	0	0	0	1	0	0	0	0	0	0	1	0	0	0	0	0
Hashupi	Skardu	35.485929°	75.696578°	Onbu	Bistorta amplexicaulis (D.Don) Greene	Polygonaceae	root	2	Powder/grinded, decoction, infusion	Herb	0	0	0	0	0	0	0	0	1	0	0	0	0	0	0	0	1	0	0	0	0	0	0	0	0	0	0	0	0
Hashupi	Skardu	35.485929°	75.696578°	Onbu	Bistorta amplexicaulis (D.Don) Greene	Polygonaceae	root	1	Powder/grinded	Herb	0	0	0	0	0	0	0	0	0	0	0	0	0	0	0	0	0	0	0	0	0	0	0	1	0	0	0	0	0
Hashupi	Skardu	35.485929°	75.696578°	Onbu	Bistorta amplexicaulis (D.Don) Greene	Polygonaceae	root	2	Powder/grinded, decoction, infusion	Herb	0	0	0	0	0	0	0	0	1	0	0	0	0	0	0	0	0	0	0	0	0	0	0	1	0	0	0	0	0
Hashupi	Skardu	35.485929°	75.696578°	Onbu	Bistorta amplexicaulis (D.Don) Greene	Polygonaceae	root	2	Powder/grinded, decoction, infusion	Herb	0	0	0	0	0	0	0	0	1	0	0	0	0	0	0	0	0	0	0	0	0	0	0	1	0	0	0	0	0
Thowar	Skardu	35.609167°	75.203611°	Onbu	Bistorta amplexicaulis (D.Don) Greene	Polygonaceae	root	2	Powder/grinded, decoction, infusion	Herb	0	0	0	0	0	0	0	0	1	0	0	0	0	0	0	0	1	0	0	0	0	0	0	0	0	0	0	0	0
Kargha	Gilgit	35.915251°	74.257648°	Sarsung mar	Brassica juncea (L.) Czern.	Brassicaceae	seed	1	Oil	Shrub	0	0	0	0	0	0	0	0	0	0	0	0	0	0	0	0	0	0	0	0	0	0	0	0	0	1	0	0	0
Kargha	Gilgit	35.915251°	74.257648°	Sarsung mar	Brassica juncea (L.) Czern.	Brassicaceae	seed	1	Oil	Shrub	0	0	0	0	0	0	0	0	0	0	0	0	0	0	0	0	0	0	0	0	0	0	0	0	0	1	0	0	0
Kargha	Gilgit	35.915251°	74.257648°	Sarsung mar	Brassica juncea (L.) Czern.	Brassicaceae	seed	1	Oil	Shrub	0	0	0	0	0	0	0	0	0	0	0	0	0	0	0	0	0	0	0	0	0	0	0	0	0	1	0	0	0
Kargha	Gilgit	35.915251°	74.257648°	Sarsung mar	Brassica juncea (L.) Czern.	Brassicaceae	seed	1	Oil	Shrub	0	0	0	0	0	0	0	0	0	0	0	0	0	0	0	0	0	0	0	0	0	0	0	0	0	1	0	0	0
Kargha	Gilgit	35.915251°	74.257648°	Sarsung mar	Brassica juncea (L.) Czern.	Brassicaceae	seed	1	Oil	Shrub	0	0	0	0	0	0	0	0	0	0	0	0	0	0	0	0	0	0	0	0	0	0	0	0	0	1	0	0	0
Rahimabad	Gilgit	36.118837°	74.297376°	Sarsung mar	Brassica juncea (L.) Czern.	Brassicaceae	seed	1	Oil	Shrub	0	0	0	0	0	0	0	0	0	0	0	0	0	0	0	0	0	0	0	0	0	0	0	0	0	1	0	0	0
Rahimabad	Gilgit	36.118837°	74.297376°	Sarsung mar	Brassica juncea (L.) Czern.	Brassicaceae	seed	1	Oil	Shrub	0	0	0	0	0	0	0	0	0	0	0	0	0	0	0	0	0	0	0	0	0	0	0	0	0	1	0	0	0
Basho	Skardu	35.469494°	75.359156°	Sarsung mar	Brassica juncea (L.) Czern.	Brassicaceae	seed	1	Oil	Shrub	0	0	0	0	0	0	0	0	0	0	0	0	0	0	0	0	0	0	0	0	0	0	0	0	0	1	0	0	0
Basho	Skardu	35.469494°	75.359156°	Sarsung mar	Brassica juncea (L.) Czern.	Brassicaceae	seed	1	Oil	Shrub	0	0	0	0	0	0	0	0	0	0	0	0	0	0	0	0	0	0	0	0	0	0	0	0	0	1	0	0	0
Hashupi	Skardu	35.485929°	75.696578°	Sarsung mar	Brassica juncea (L.) Czern.	Brassicaceae	seed	1	Oil	Shrub	0	0	0	0	0	0	0	0	0	0	0	0	0	0	0	0	0	0	0	0	0	0	0	0	0	1	0	0	0
Hashupi	Skardu	35.485929°	75.696578°	Sarsung mar	Brassica juncea (L.) Czern.	Brassicaceae	seed	1	Oil	Shrub	0	0	0	0	0	0	0	0	0	0	0	0	0	0	0	0	0	0	0	0	0	0	0	0	0	1	0	0	0
Hosho	Skardu	35.345214°	75.515283°	Sarsung mar	Brassica juncea (L.) Czern.	Brassicaceae	seed	1	Oil	Shrub	0	0	0	0	0	0	0	0	0	0	0	0	0	0	0	0	0	0	0	0	0	0	0	0	0	1	0	0	0
Thowar	Skardu	35.609167°	75.203611°	Sarsung mar	Brassica juncea (L.) Czern.	Brassicaceae	seed	1	Oil	Shrub	0	0	0	0	0	0	0	0	0	0	0	0	0	0	0	0	0	0	0	0	0	0	0	0	0	1	0	0	0
Thowar	Skardu	35.609167°	75.203611°	Sarsung mar	Brassica juncea (L.) Czern.	Brassicaceae	seed	1	Oil	Shrub	0	0	0	0	0	0	0	0	0	0	0	0	0	0	0	0	0	0	0	0	0	0	0	0	0	1	0	0	0
Aliabad	Hunza	36.308563°	74.619496°	Phul Gobi	Brassica oleracea var. botrytis L.	Brassicaceae	flower	1	Direct	Shrub	0	0	0	0	0	0	0	0	0	0	0	0	0	0	0	0	0	0	0	0	0	0	0	0	0	1	0	0	0
Aliabad	Hunza	36.308563°	74.619496°	Phul Gobi	Brassica oleracea var. botrytis L.	Brassicaceae	flower	1	Direct	Shrub	0	0	0	0	0	0	0	0	0	0	0	0	0	0	0	0	0	0	0	0	0	0	0	0	0	1	0	0	0
Aliabad	Hunza	36.308563°	74.619496°	Phul Gobi	Brassica oleracea var. botrytis L.	Brassicaceae	flower	1	Direct	Shrub	0	0	0	0	0	0	0	0	0	0	0	0	0	0	0	0	0	0	0	0	0	0	0	0	0	1	0	0	0
Altit	Hunza	36.316102°	74.681835°	Phul Gobi	Brassica oleracea var. botrytis L.	Brassicaceae	flower	1	Direct	Shrub	0	0	0	0	0	0	0	0	0	0	0	0	0	0	0	0	0	0	0	0	0	0	0	0	0	1	0	0	0
Karimabad	Hunza	36.326408°	74.664316°	Phul Gobi	Brassica oleracea var. botrytis L.	Brassicaceae	flower	1	Direct	Shrub	0	0	0	0	0	0	0	0	0	0	0	0	0	0	0	0	0	0	0	0	0	0	0	0	0	1	0	0	0
Murtazaabad	Hunza	36.285517°	74.607833°	Phul Gobi	Brassica oleracea var. botrytis L.	Brassicaceae	flower	1	Direct	Shrub	0	0	0	0	0	0	0	0	0	0	0	0	0	0	0	0	0	0	0	0	0	0	0	0	0	1	0	0	0
Altit	Hunza	36.316102°	74.681835°	Band Gobi	Brassica oleracea var. capitata L.	Brassicaceae	flower	1	Direct	Shrub	0	0	0	0	0	0	0	0	0	0	0	0	0	0	0	0	0	0	0	0	0	0	0	0	0	1	0	0	0
Altit	Hunza	36.316102°	74.681835°	Band Gobi	Brassica oleracea var. capitata L.	Brassicaceae	flower	1	Direct	Shrub	0	0	0	0	0	0	0	0	0	0	0	0	0	0	0	0	0	0	0	0	0	0	0	0	0	1	0	0	0
Altit	Hunza	36.316102°	74.681835°	Band Gobi	Brassica oleracea var. capitata L.	Brassicaceae	flower	1	Direct	Shrub	0	0	0	0	0	0	0	0	0	0	0	0	0	0	0	0	0	0	0	0	0	0	0	0	0	1	0	0	0
Karimabad	Hunza	36.326408°	74.664316°	Band Gobi	Brassica oleracea var. capitata L.	Brassicaceae	flower	1	Direct	Shrub	0	0	0	0	0	0	0	0	0	0	0	0	0	0	0	0	0	0	0	0	0	0	0	0	0	1	0	0	0
Karimabad	Hunza	36.326408°	74.664316°	Band Gobi	Brassica oleracea var. capitata L.	Brassicaceae	flower	1	Direct	Shrub	0	0	0	0	0	0	0	0	0	0	0	0	0	0	0	0	0	0	0	0	0	0	0	0	0	1	0	0	0
Murtazaabad	Hunza	36.285517°	74.607833°	Band Gobi	Brassica oleracea var. capitata L.	Brassicaceae	flower	1	Direct	Shrub	0	0	0	0	0	0	0	0	0	0	0	0	0	0	0	0	0	0	0	0	0	0	0	0	0	1	0	0	0
Ghulmit	Nagar	36.241766°	74.462110°	Band Gobi	Brassica oleracea var. capitata L.	Brassicaceae	flower	2	Direct	Shrub	0	2	0	0	0	0	0	0	0	0	0	0	0	0	0	0	0	0	0	0	0	0	0	0	0	0	0	0	0
Minapin	Nagar	36.250922°	74.536075°	Band Gobi	Brassica oleracea var. capitata L.	Brassicaceae	flower	2	Direct	Shrub	0	2	0	0	0	0	0	0	0	0	0	0	0	0	0	0	0	0	0	0	0	0	0	0	0	0	0	0	0
Minapin	Nagar	36.250922°	74.536075°	Band Gobi	Brassica oleracea var. capitata L.	Brassicaceae	flower	1	Direct	Shrub	0	1	0	0	0	0	0	0	0	0	0	0	0	0	0	0	0	0	0	0	0	0	0	0	0	0	0	0	0
Phekar	Nagar	36.263297°	74.594568°	Band Gobi	Brassica oleracea var. capitata L.	Brassicaceae	flower	1	Direct	Shrub	0	1	0	0	0	0	0	0	0	0	0	0	0	0	0	0	0	0	0	0	0	0	0	0	0	0	0	0	0
Phekar	Nagar	36.263297°	74.594568°	Band Gobi	Brassica oleracea var. capitata L.	Brassicaceae	flower	2	Direct	Shrub	0	2	0	0	0	0	0	0	0	0	0	0	0	0	0	0	0	0	0	0	0	0	0	0	0	0	0	0	0
Phekar	Nagar	36.263297°	74.594568°	Band Gobi	Brassica oleracea var. capitata L.	Brassicaceae	flower	2	Direct	Shrub	0	2	0	0	0	0	0	0	0	0	0	0	0	0	0	0	0	0	0	0	0	0	0	0	0	0	0	0	0
Basho	Skardu	35.469494°	75.359156°	Angaroo	Buxus papillosa C.K. Schneid	Buxaceae	leaves	1	Oil	Shrub	0	1	0	0	0	0	0	0	0	0	0	0	0	0	0	0	0	0	0	0	0	0	0	0	0	0	0	0	0
Basho	Skardu	35.469494°	75.359156°	Angaroo	Buxus papillosa C.K. Schneid	Buxaceae	leaves	2	Oil	Shrub	0	2	0	0	0	0	0	0	0	0	0	0	0	0	0	0	0	0	0	0	0	0	0	0	0	0	0	0	0
Basho	Skardu	35.469494°	75.359156°	Angaroo	Buxus papillosa C.K. Schneid	Buxaceae	leaves	1	Oil	Shrub	0	1	0	0	0	0	0	0	0	0	0	0	0	0	0	0	0	0	0	0	0	0	0	0	0	0	0	0	0
Hashupi	Skardu	35.485929°	75.696578°	Angaroo	Buxus papillosa C.K. Schneid	Buxaceae	leaves	2	Oil	Shrub	0	2	0	0	0	0	0	0	0	0	0	0	0	0	0	0	0	0	0	0	0	0	0	0	0	0	0	0	0
Hashupi	Skardu	35.485929°	75.696578°	Angaroo	Buxus papillosa C.K. Schneid	Buxaceae	leaves	2	Oil	Shrub	0	2	0	0	0	0	0	0	0	0	0	0	0	0	0	0	0	0	0	0	0	0	0	0	0	0	0	0	0
Hashupi	Skardu	35.485929°	75.696578°	Angaroo	Buxus papillosa C.K. Schneid	Buxaceae	leaves	2	Oil	Shrub	0	2	0	0	0	0	0	0	0	0	0	0	0	0	0	0	0	0	0	0	0	0	0	0	0	0	0	0	0
Hashupi	Skardu	35.485929°	75.696578°	Angaroo	Buxus papillosa C.K. Schneid	Buxaceae	leaves	2	Oil	Shrub	0	2	0	0	0	0	0	0	0	0	0	0	0	0	0	0	0	0	0	0	0	0	0	0	0	0	0	0	0
Kargha	Gilgit	35.915251°	74.257648°	Thounch	Cannabis sativa L.	Cannabinaeae	whole plant	3	Direct	Herb	0	0	1	0	0	0	0	1	0	0	0	0	0	0	0	0	0	0	0	0	0	0	0	1	0	0	0	0	0
Kargha	Gilgit	35.915251°	74.257648°	Thounch	Cannabis sativa L.	Cannabinaeae	whole plant	3	Direct	Herb	0	0	1	0	0	0	0	1	0	0	0	0	0	0	0	0	1	0	0	0	0	0	0	0	0	0	0	0	0
Kargha	Gilgit	35.915251°	74.257648°	Thounch	Cannabis sativa L.	Cannabinaeae	whole plant	3	Direct	Herb	0	0	1	0	0	0	0	1	0	0	0	0	0	0	0	0	1	0	0	0	0	0	0	0	0	0	0	0	0
Kargha	Gilgit	35.915251°	74.257648°	Thounch	Cannabis sativa L.	Cannabinaeae	whole plant	2	Direct	Herb	0	0	1	0	0	0	0	0	0	0	0	0	0	0	0	0	0	0	0	0	0	0	0	1	0	0	0	0	0
Kargha	Gilgit	35.915251°	74.257648°	Thounch	Cannabis sativa L.	Cannabinaeae	whole plant	2	Direct	Herb	0	0	1	0	0	0	0	0	0	0	0	0	0	0	0	0	1	0	0	0	0	0	0	0	0	0	0	0	0
Rahimabad	Gilgit	36.118837°	74.297376°	Thounch	Cannabis sativa L.	Cannabinaeae	whole plant	4	Direct	Herb	0	0	1	0	0	0	0	1	0	0	0	0	0	0	0	0	1	0	0	0	0	0	0	1	0	0	0	0	0
Rahimabad	Gilgit	36.118837°	74.297376°	Thounch	Cannabis sativa L.	Cannabinaeae	whole plant	3	Direct	Herb	0	0	1	0	0	0	0	1	0	0	0	0	0	0	0	0	0	0	0	0	0	0	0	1	0	0	0	0	0
Aliabad	Hunza	36.308563°	74.619496°	Thoonch	Cannabis sativa L.	Cannabinaeae	seed	2	Direct	Herb	0	0	1	0	0	0	0	0	0	0	0	0	0	0	0	0	1	0	0	0	0	0	0	0	0	0	0	0	0
Aliabad	Hunza	36.308563°	74.619496°	Thoonch	Cannabis sativa L.	Cannabinaeae	seed	4	Direct	Herb	0	0	1	0	0	0	0	1	0	0	0	0	0	0	0	0	1	0	0	0	0	0	0	1	0	0	0	0	0
Aliabad	Hunza	36.308563°	74.619496°	Thoonch	Cannabis sativa L.	Cannabinaeae	seed	2	Direct	Herb	0	0	1	0	0	0	0	0	0	0	0	0	0	0	0	0	1	0	0	0	0	0	0	0	0	0	0	0	0
Aliabad	Hunza	36.308563°	74.619496°	Thoonch	Cannabis sativa L.	Cannabinaeae	seed	3	Direct	Herb	0	0	0	0	0	0	0	1	0	0	0	0	0	0	0	0	1	0	0	0	0	0	0	1	0	0	0	0	0
Aliabad	Hunza	36.308563°	74.619496°	Thoonch	Cannabis sativa L.	Cannabinaeae	seed	3	Direct	Herb	0	0	1	0	0	0	0	1	0	0	0	0	0	0	0	0	1	0	0	0	0	0	0	0	0	0	0	0	0
Aliabad	Hunza	36.308563°	74.619496°	Thoonch	Cannabis sativa L.	Cannabinaeae	seed	4	Direct	Herb	0	0	1	0	0	0	0	1	0	0	0	0	0	0	0	0	1	0	0	0	0	0	0	1	0	0	0	0	0
Aliabad	Hunza	36.308563°	74.619496°	Thoonch	Cannabis sativa L.	Cannabinaeae	seed	2	Direct	Herb	0	0	1	0	0	0	0	0	0	0	0	0	0	0	0	0	1	0	0	0	0	0	0	0	0	0	0	0	0
Altit	Hunza	36.316102°	74.681835°	Thoonch	Cannabis sativa L.	Cannabinaeae	seed	3	Direct	Herb	0	0	0	0	0	0	0	1	0	0	0	0	0	0	0	0	1	0	0	0	0	0	0	1	0	0	0	0	0
Altit	Hunza	36.316102°	74.681835°	Thoonch	Cannabis sativa L.	Cannabinaeae	seed	3	Direct	Herb	0	0	1	0	0	0	0	1	0	0	0	0	0	0	0	0	1	0	0	0	0	0	0	0	0	0	0	0	0
Karimabad	Hunza	36.326408°	74.664316°	Thoonch	Cannabis sativa L.	Cannabinaeae	seed	4	Direct	Herb	0	0	1	0	0	0	0	1	0	0	0	0	0	0	0	0	1	0	0	0	0	0	0	1	0	0	0	0	0
Karimabad	Hunza	36.326408°	74.664316°	Thoonch	Cannabis sativa L.	Cannabinaeae	seed	4	Direct	Herb	0	0	1	0	0	0	0	1	0	0	0	0	0	0	0	0	1	0	0	0	0	0	0	1	0	0	0	0	0
Murtazaabad	Hunza	36.285517°	74.607833°	Thoonch	Cannabis sativa L.	Cannabinaeae	seed	3	Direct	Herb	0	0	1	0	0	0	0	1	0	0	0	0	0	0	0	0	1	0	0	0	0	0	0	0	0	0	0	0	0
Murtazaabad	Hunza	36.285517°	74.607833°	Thoonch	Cannabis sativa L.	Cannabinaeae	seed	3	Direct	Herb	0	0	1	0	0	0	0	1	0	0	0	0	0	0	0	0	1	0	0	0	0	0	0	0	0	0	0	0	0
Murtazaabad	Hunza	36.285517°	74.607833°	Thoonch	Cannabis sativa L.	Cannabinaeae	seed	3	Direct	Herb	0	0	0	0	0	0	0	1	0	0	0	0	0	0	0	0	1	0	0	0	0	0	0	1	0	0	0	0	0
Ghulmit	Nagar	36.241766°	74.462110°	Thoonch	Cannabis sativa L.	Cannabinaeae	seed	3	Direct	Herb	0	0	0	0	0	0	0	1	0	0	0	0	0	0	0	0	1	0	0	0	0	0	0	1	0	0	0	0	0
Ghulmit	Nagar	36.241766°	74.462110°	Thoonch	Cannabis sativa L.	Cannabinaeae	seed	4	Direct	Herb	0	0	1	0	0	0	0	1	0	0	0	0	0	0	0	0	1	0	0	0	0	0	0	1	0	0	0	0	0
Ghulmit	Nagar	36.241766°	74.462110°	Thoonch	Cannabis sativa L.	Cannabinaeae	seed	2	Direct	Herb	0	0	1	0	0	0	0	0	0	0	0	0	0	0	0	0	1	0	0	0	0	0	0	0	0	0	0	0	0
Ghulmit	Nagar	36.241766°	74.462110°	Thoonch	Cannabis sativa L.	Cannabinaeae	seed	2	Direct	Herb	0	0	1	0	0	0	0	0	0	0	0	0	0	0	0	0	1	0	0	0	0	0	0	0	0	0	0	0	0
Minapin	Nagar	36.250922°	74.536075°	Thoonch	Cannabis sativa L.	Cannabinaeae	seed	1	Direct	Herb	0	0	0	0	0	0	0	0	0	0	0	0	0	0	0	0	1	0	0	0	0	0	0	0	0	0	0	0	0
Minapin	Nagar	36.250922°	74.536075°	Thoonch	Cannabis sativa L.	Cannabinaeae	seed	1	Direct	Herb	0	0	0	0	0	0	0	0	0	0	0	0	0	0	0	0	1	0	0	0	0	0	0	0	0	0	0	0	0
Minapin	Nagar	36.250922°	74.536075°	Thoonch	Cannabis sativa L.	Cannabinaeae	seed	4	Direct	Herb	0	0	1	0	0	0	0	1	0	0	0	0	0	0	0	0	1	0	0	0	0	0	0	1	0	0	0	0	0
Minapin	Nagar	36.250922°	74.536075°	Thoonch	Cannabis sativa L.	Cannabinaeae	seed	4	Direct	Herb	0	0	1	0	0	0	0	1	0	0	0	0	0	0	0	0	1	0	0	0	0	0	0	1	0	0	0	0	0
Nagar Khas	Nagar	36.276377°	74.719955°	Thoonch	Cannabis sativa L.	Cannabinaeae	seed	2	Direct	Herb	0	0	1	0	0	0	0	0	0	0	0	0	0	0	0	0	1	0	0	0	0	0	0	0	0	0	0	0	0
Nagar Khas	Nagar	36.276377°	74.719955°	Thoonch	Cannabis sativa L.	Cannabinaeae	seed	4	Direct	Herb	0	0	1	0	0	0	0	1	0	0	0	0	0	0	0	0	1	0	0	0	0	0	0	1	0	0	0	0	0
Phekar	Nagar	36.263297°	74.594568°	Thoonch	Cannabis sativa L.	Cannabinaeae	seed	3	Direct	Herb	0	0	0	0	0	0	0	1	0	0	0	0	0	0	0	0	1	0	0	0	0	0	0	1	0	0	0	0	0
Phekar	Nagar	36.263297°	74.594568°	Thoonch	Cannabis sativa L.	Cannabinaeae	seed	2	Direct	Herb	0	0	1	0	0	0	0	0	0	0	0	0	0	0	0	0	1	0	0	0	0	0	0	0	0	0	0	0	0
Phekar	Nagar	36.263297°	74.594568°	Thoonch	Cannabis sativa L.	Cannabinaeae	seed	2	Direct	Herb	0	0	1	0	0	0	0	0	0	0	0	0	0	0	0	0	1	0	0	0	0	0	0	0	0	0	0	0	0
Phekar	Nagar	36.263297°	74.594568°	Thoonch	Cannabis sativa L.	Cannabinaeae	seed	4	Direct	Herb	0	0	1	0	0	0	0	1	0	0	0	0	0	0	0	0	1	0	0	0	0	0	0	1	0	0	0	0	0
Eidgah	Astore	35.347049°	74.857882°	Thringthringmo	Canvolvulus arvensis L.	Convolvulaceae	whole plant	1	Powder/grinded	Herb	0	0	0	0	0	0	0	1	0	0	0	0	0	0	0	0	0	0	0	0	0	0	0	0	0	0	0	0	0
Eidgah	Astore	35.347049°	74.857882°	Thringthringmo	Canvolvulus arvensis L.	Convolvulaceae	whole plant	1	Decoction, powder/grinded	Herb	0	0	0	0	0	0	0	1	0	0	0	0	0	0	0	0	0	0	0	0	0	0	0	0	0	0	0	0	0
Eidgah	Astore	35.347049°	74.857882°	Thringthringmo	Canvolvulus arvensis L.	Convolvulaceae	whole plant	1	Decoction, powder/grinded	Herb	0	0	0	0	0	0	0	1	0	0	0	0	0	0	0	0	0	0	0	0	0	0	0	0	0	0	0	0	0
Eidgah	Astore	35.347049°	74.857882°	Thringthringmo	Canvolvulus arvensis L.	Convolvulaceae	whole plant	1	Decoction, powder/grinded	Herb	0	0	0	0	0	0	0	1	0	0	0	0	0	0	0	0	0	0	0	0	0	0	0	0	0	0	0	0	0
Eidgah	Astore	35.347049°	74.857882°	Thringthringmo	Canvolvulus arvensis L.	Convolvulaceae	whole plant	1	Decoction, powder/grinded	Herb	0	0	0	0	0	0	0	1	0	0	0	0	0	0	0	0	0	0	0	0	0	0	0	0	0	0	0	0	0
Rattu	Astore	35.168461°	74.791752°1	Thringthringmo	Canvolvulus arvensis L.	Convolvulaceae	whole plant	1	Decoction, powder/grinded	Herb	0	0	0	0	0	0	0	1	0	0	0	0	0	0	0	0	0	0	0	0	0	0	0	0	0	0	0	0	0
Kargha	Gilgit	35.915251°	74.257648°	Thringthringmo	Canvolvulus arvensis L.	Convolvulaceae	whole plant	1	Decoction, powder/grinded	Herb	0	0	0	0	0	0	0	1	0	0	0	0	0	0	0	0	0	0	0	0	0	0	0	0	0	0	0	0	0
Kargha	Gilgit	35.915251°	74.257648°	Thringthringmo	Canvolvulus arvensis L.	Convolvulaceae	whole plant	1	Decoction, powder/grinded	Herb	0	0	0	0	0	0	0	1	0	0	0	0	0	0	0	0	0	0	0	0	0	0	0	0	0	0	0	0	0
Kargha	Gilgit	35.915251°	74.257648°	Thringthringmo	Canvolvulus arvensis L.	Convolvulaceae	whole plant	1	Decoction, powder/grinded	Herb	0	0	0	0	0	0	0	1	0	0	0	0	0	0	0	0	0	0	0	0	0	0	0	0	0	0	0	0	0
Rahimabad	Gilgit	36.118837°	74.297376°	Thringthringmo	Canvolvulus arvensis L.	Convolvulaceae	whole plant	1	Decoction, powder/grinded	Herb	0	0	0	0	0	0	0	1	0	0	0	0	0	0	0	0	0	0	0	0	0	0	0	0	0	0	0	0	0
Rahimabad	Gilgit	36.118837°	74.297376°	Thringthringmo	Canvolvulus arvensis L.	Convolvulaceae	whole plant	1	Decoction, powder/grinded	Herb	0	0	0	0	0	0	0	1	0	0	0	0	0	0	0	0	0	0	0	0	0	0	0	0	0	0	0	0	0
Rahimabad	Gilgit	36.118837°	74.297376°	Thringthringmo	Canvolvulus arvensis L.	Convolvulaceae	whole plant	1	Decoction, powder/grinded	Herb	0	0	0	0	0	0	0	1	0	0	0	0	0	0	0	0	0	0	0	0	0	0	0	0	0	0	0	0	0
Basho	Skardu	35.469494°	75.359156°	Thringthringmo	Canvolvulus arvensis L.	Convolvulaceae	whole plant	1	Powder/grinded	Herb	0	0	0	0	0	0	0	1	0	0	0	0	0	0	0	0	0	0	0	0	0	0	0	0	0	0	0	0	0
Hashupi	Skardu	35.485929°	75.696578°	Thringthringmo	Canvolvulus arvensis L.	Convolvulaceae	whole plant	1	Powder/grinded	Herb	0	0	0	0	0	0	0	1	0	0	0	0	0	0	0	0	0	0	0	0	0	0	0	0	0	0	0	0	0
Hashupi	Skardu	35.485929°	75.696578°	Thringthringmo	Canvolvulus arvensis L.	Convolvulaceae	whole plant	1	Powder/grinded	Herb	0	0	0	0	0	0	0	1	0	0	0	0	0	0	0	0	0	0	0	0	0	0	0	0	0	0	0	0	0
Hosho	Skardu	35.345214°	75.515283°	Thringthringmo	Canvolvulus arvensis L.	Convolvulaceae	whole plant	1	Powder/grinded	Herb	0	0	0	0	0	0	0	1	0	0	0	0	0	0	0	0	0	0	0	0	0	0	0	0	0	0	0	0	0
Thowar	Skardu	35.609167°	75.203611°	Thringthringmo	Canvolvulus arvensis L.	Convolvulaceae	whole plant	1	Powder/grinded	Herb	0	0	0	0	0	0	0	1	0	0	0	0	0	0	0	0	0	0	0	0	0	0	0	0	0	0	0	0	0
Thowar	Skardu	35.609167°	75.203611°	Thringthringmo	Canvolvulus arvensis L.	Convolvulaceae	whole plant	1	Powder/grinded	Herb	0	0	0	0	0	0	0	1	0	0	0	0	0	0	0	0	0	0	0	0	0	0	0	0	0	0	0	0	0
Bilchar/Bagrote	Gilgit	35.942517°	74.545274°	Kavir	Capparis spinosa L.	Capparaceae	root, bark, fruit, seed	5	Oil, paste	Shrub	0	0	2	0	0	0	0	0	1	0	0	0	0	1	0	0	0	0	1	0	0	0	0	0	0	0	0	0	0
Bilchar/Bagrote	Gilgit	35.942517°	74.545274°	Kavir	Capparis spinosa L.	Capparaceae	root, bark, fruit, seed	8	Oil, paste	Shrub	0	0	3	0	0	0	0	0	1	0	0	0	0	1	0	0	0	0	2	0	0	1	0	0	0	0	0	0	0
Bilchar/Bagrote	Gilgit	35.942517°	74.545274°	Kavir	Capparis spinosa L.	Capparaceae	root, bark, fruit, seed	8	Oil, paste	Shrub	0	0	3	0	0	0	0	0	1	0	0	0	0	1	0	0	0	0	2	0	0	1	0	0	0	0	0	0	0
Bilchar/Bagrote	Gilgit	35.942517°	74.545274°	Kavir	Capparis spinosa L.	Capparaceae	root, bark, fruit, seed	8	Oil, paste	Shrub	0	0	3	0	0	0	0	0	1	0	0	0	0	1	0	0	0	0	2	0	0	1	0	0	0	0	0	0	0
Bilchar/Bagrote	Gilgit	35.942517°	74.545274°	Kavir	Capparis spinosa L.	Capparaceae	root, bark, fruit, seed	8	Oil, paste	Shrub	0	0	3	0	0	0	0	0	1	0	0	0	0	1	0	0	0	0	2	0	0	1	0	0	0	0	0	0	0
Danyore	Gilgit	35.919880°	74.386181°	Kavir	Capparis spinosa L.	Capparaceae	root, bark, fruit, seed	8	Oil, paste	Shrub	0	0	3	0	0	0	0	0	1	0	0	0	0	1	0	0	0	0	2	0	0	1	0	0	0	0	0	0	0
Danyore	Gilgit	35.919880°	74.386181°	Kavir	Capparis spinosa L.	Capparaceae	root, bark, fruit, seed	3	Oil, paste	Shrub	0	0	1	0	0	0	0	0	1	0	0	0	0	0	0	0	0	0	0	0	0	1	0	0	0	0	0	0	0
Danyore	Gilgit	35.919880°	74.386181°	Kavir	Capparis spinosa L.	Capparaceae	root, bark, fruit, seed	8	Oil, paste	Shrub	0	0	3	0	0	0	0	0	1	0	0	0	0	1	0	0	0	0	2	0	0	1	0	0	0	0	0	0	0
Danyore	Gilgit	35.919880°	74.386181°	Kavir	Capparis spinosa L.	Capparaceae	root, bark, fruit, seed	8	Oil, paste	Shrub	0	0	3	0	0	0	0	0	1	0	0	0	0	1	0	0	0	0	2	0	0	1	0	0	0	0	0	0	0
Jalalabad	Gilgit	35.880457°	74.493590°	Kavir	Capparis spinosa L.	Capparaceae	root, bark, fruit, seed	2	Oil, paste	Shrub	0	0	1	0	0	0	0	0	1	0	0	0	0	0	0	0	0	0	0	0	0	0	0	0	0	0	0	0	0
Jalalabad	Gilgit	35.880457°	74.493590°	Kavir	Capparis spinosa L.	Capparaceae	root, bark, fruit, seed	8	Oil, paste	Shrub	0	0	3	0	0	0	0	0	1	0	0	0	0	1	0	0	0	0	2	0	0	1	0	0	0	0	0	0	0
Jalalabad	Gilgit	35.880457°	74.493590°	Kavir	Capparis spinosa L.	Capparaceae	root, bark, fruit, seed	8	Oil, paste	Shrub	0	0	3	0	0	0	0	0	1	0	0	0	0	1	0	0	0	0	2	0	0	1	0	0	0	0	0	0	0
Jalalabad	Gilgit	35.880457°	74.493590°	Kavir	Capparis spinosa L.	Capparaceae	root, bark, fruit, seed	8	Oil, paste	Shrub	0	0	3	0	0	0	0	0	1	0	0	0	0	1	0	0	0	0	2	0	0	1	0	0	0	0	0	0	0
Kargha	Gilgit	35.915251°	74.257648°	Champarrang	Capparis spinosa L.	Capparaceae	seed	1	Oil, paste	Shrub	0	0	1	0	0	0	0	0	0	0	0	0	0	0	0	0	0	0	0	0	0	0	0	0	0	0	0	0	0
Kargha	Gilgit	35.915251°	74.257648°	Champarrang	Capparis spinosa L.	Capparaceae	seed	1	Oil, paste	Shrub	0	0	1	0	0	0	0	0	0	0	0	0	0	0	0	0	0	0	0	0	0	0	0	0	0	0	0	0	0
Kargha	Gilgit	35.915251°	74.257648°	Champarrang	Capparis spinosa L.	Capparaceae	seed	1	Oil, paste	Shrub	0	0	1	0	0	0	0	0	0	0	0	0	0	0	0	0	0	0	0	0	0	0	0	0	0	0	0	0	0
Kargha	Gilgit	35.915251°	74.257648°	Champarrang	Capparis spinosa L.	Capparaceae	seed	1	Oil, paste	Shrub	0	0	1	0	0	0	0	0	0	0	0	0	0	0	0	0	0	0	0	0	0	0	0	0	0	0	0	0	0
Kargha	Gilgit	35.915251°	74.257648°	Champarrang	Capparis spinosa L.	Capparaceae	seed	1	Oil, paste	Shrub	0	0	1	0	0	0	0	0	0	0	0	0	0	0	0	0	0	0	0	0	0	0	0	0	0	0	0	0	0
Rahimabad	Gilgit	36.118837°	74.297376°	Champarrang	Capparis spinosa L.	Capparaceae	seed	1	Oil, paste	Shrub	0	0	1	0	0	0	0	0	0	0	0	0	0	0	0	0	0	0	0	0	0	0	0	0	0	0	0	0	0
Rahimabad	Gilgit	36.118837°	74.297376°	Champarrang	Capparis spinosa L.	Capparaceae	seed	1	Oil, paste	Shrub	0	0	1	0	0	0	0	0	0	0	0	0	0	0	0	0	0	0	0	0	0	0	0	0	0	0	0	0	0
Altit	Hunza	36.316102°	74.681835°	Chopir	Capparis spinosa L.	Capparaceae	seed	5	Oil, paste	Shrub	0	0	4	0	0	0	0	0	0	0	1	0	0	0	0	0	0	0	0	0	0	0	0	0	0	0	0	0	0
Altit	Hunza	36.316102°	74.681835°	Chopir	Capparis spinosa L.	Capparaceae	seed	5	Oil, paste	Shrub	0	0	4	0	0	0	0	0	0	0	1	0	0	0	0	0	0	0	0	0	0	0	0	0	0	0	0	0	0
Altit	Hunza	36.316102°	74.681835°	Chopir	Capparis spinosa L.	Capparaceae	seed	4	Oil, paste	Shrub	0	0	4	0	0	0	0	0	0	0	0	0	0	0	0	0	0	0	0	0	0	0	0	0	0	0	0	0	0
Altit	Hunza	36.316102°	74.681835°	Chopir	Capparis spinosa L.	Capparaceae	seed	1	Oil, paste	Shrub	0	0	1	0	0	0	0	0	0	0	0	0	0	0	0	0	0	0	0	0	0	0	0	0	0	0	0	0	0
Altit	Hunza	36.316102°	74.681835°	Chopir	Capparis spinosa L.	Capparaceae	seed	5	Oil, paste	Shrub	0	0	4	0	0	0	0	0	0	0	1	0	0	0	0	0	0	0	0	0	0	0	0	0	0	0	0	0	0
Altit	Hunza	36.316102°	74.681835°	Chopir	Capparis spinosa L.	Capparaceae	seed	3	Oil, paste	Shrub	0	0	3	0	0	0	0	0	0	0	0	0	0	0	0	0	0	0	0	0	0	0	0	0	0	0	0	0	0
Ghulkin	Hunza	36.407318°	74.863984°	Kappar	Capparis spinosa L.	Capparaceae	floral bud, fruit	5	Oil, paste	Shrub	0	1	0	0	0	1	0	0	0	0	0	0	0	0	0	0	3	0	0	0	0	0	0	0	0	0	0	0	0
Ghulkin	Hunza	36.407318°	74.863984°	Kappar	Capparis spinosa L.	Capparaceae	floral bud, fruit	4	Oil, paste	Shrub	0	0	0	0	0	1	0	0	0	0	0	0	0	0	0	0	3	0	0	0	0	0	0	0	0	0	0	0	0
Ghulkin	Hunza	36.407318°	74.863984°	Kappar	Capparis spinosa L.	Capparaceae	floral bud, fruit	4	Oil, paste	Shrub	0	0	0	0	0	1	0	0	0	0	0	0	0	0	0	0	3	0	0	0	0	0	0	0	0	0	0	0	0
Ghulkin	Hunza	36.407318°	74.863984°	Kappar	Capparis spinosa L.	Capparaceae	floral bud, fruit	4	Oil, paste	Shrub	0	0	0	0	0	1	0	0	0	0	0	0	0	0	0	0	3	0	0	0	0	0	0	0	0	0	0	0	0
Karimabad	Hunza	36.326408°	74.664316°	Chopir	Capparis spinosa L.	Capparaceae	seed	5	Oil, paste	Shrub	0	0	4	0	0	0	0	0	0	0	1	0	0	0	0	0	0	0	0	0	0	0	0	0	0	0	0	0	0
Karimabad	Hunza	36.326408°	74.664316°	Chopir	Capparis spinosa L.	Capparaceae	seed	4	Oil, paste	Shrub	0	0	4	0	0	0	0	0	0	0	0	0	0	0	0	0	0	0	0	0	0	0	0	0	0	0	0	0	0
Karimabad	Hunza	36.326408°	74.664316°	Chopir	Capparis spinosa L.	Capparaceae	seed	5	Oil, paste	Shrub	0	0	4	0	0	0	0	0	0	0	1	0	0	0	0	0	0	0	0	0	0	0	0	0	0	0	0	0	0
Murtazaabad	Hunza	36.285517°	74.607833°	Chopir	Capparis spinosa L.	Capparaceae	seed	5	Oil, paste	Shrub	0	0	4	0	0	0	0	0	0	0	1	0	0	0	0	0	0	0	0	0	0	0	0	0	0	0	0	0	0
Murtazaabad	Hunza	36.285517°	74.607833°	Chopir	Capparis spinosa L.	Capparaceae	seed	1	Oil, paste	Shrub	0	0	1	0	0	0	0	0	0	0	0	0	0	0	0	0	0	0	0	0	0	0	0	0	0	0	0	0	0
Murtazaabad	Hunza	36.285517°	74.607833°	Chopir	Capparis spinosa L.	Capparaceae	seed	5	Oil, paste	Shrub	0	0	4	0	0	0	0	0	0	0	1	0	0	0	0	0	0	0	0	0	0	0	0	0	0	0	0	0	0
Murtazaabad	Hunza	36.285517°	74.607833°	Chopir	Capparis spinosa L.	Capparaceae	seed	4	Oil, paste	Shrub	0	0	3	0	0	0	0	0	0	0	1	0	0	0	0	0	0	0	0	0	0	0	0	0	0	0	0	0	0
Murtazaabad	Hunza	36.285517°	74.607833°	Chopir	Capparis spinosa L.	Capparaceae	seed	2	Oil, paste	Shrub	0	0	1	0	0	0	0	0	0	0	1	0	0	0	0	0	0	0	0	0	0	0	0	0	0	0	0	0	0
Shimshal	Hunza	36.436464°	75.313109°	Kappar	Capparis spinosa L.	Capparaceae	floral bud, fruit	5	Oil, paste	Shrub	0	1	0	0	0	1	0	0	0	0	0	0	0	0	0	0	3	0	0	0	0	0	0	0	0	0	0	0	0
Shimshal	Hunza	36.436464°	75.313109°	Kappar	Capparis spinosa L.	Capparaceae	floral bud, fruit	3	Oil, paste	Shrub	0	1	0	0	0	1	0	0	0	0	0	0	0	0	0	0	1	0	0	0	0	0	0	0	0	0	0	0	0
Shimshal	Hunza	36.436464°	75.313109°	Kappar	Capparis spinosa L.	Capparaceae	floral bud, fruit	3	Oil, paste	Shrub	0	1	0	0	0	1	0	0	0	0	0	0	0	0	0	0	1	0	0	0	0	0	0	0	0	0	0	0	0
Ghulmit	Nagar	36.241766°	74.462110°	Thoonch	Capparis spinosa L.	Capparaceae	seed	5	Oil, paste	Shrub	0	0	4	0	0	0	0	0	0	0	1	0	0	0	0	0	0	0	0	0	0	0	0	0	0	0	0	0	0
Ghulmit	Nagar	36.241766°	74.462110°	Kraba/Kavir/Kappar/ChopirShorot	Capparis spinosa L.	Capparaceae	seed	5	Oil, paste	Shrub	0	0	4	0	0	0	0	0	0	0	1	0	0	0	0	0	0	0	0	0	0	0	0	0	0	0	0	0	0
Ghulmit	Nagar	36.241766°	74.462110°	Kraba/Kavir/Kappar/ChopirShorot	Capparis spinosa L.	Capparaceae	seed	2	Oil, paste	Shrub	0	0	1	0	0	0	0	0	0	0	0	0	0	0	0	0	1	0	0	0	0	0	0	0	0	0	0	0	0
Ghulmit	Nagar	36.241766°	74.462110°	Kraba/Kavir/Kappar/ChopirShorot	Capparis spinosa L.	Capparaceae	seed, branches	2	Oil, paste	Shrub	0	0	2	0	0	0	0	0	0	0	0	0	0	0	0	0	0	0	0	0	0	0	0	0	0	0	0	0	0
Ghulmit	Nagar	36.241766°	74.462110°	Kraba/Kavir/Kappar/ChopirShorot	Capparis spinosa L.	Capparaceae	floral bud, fruit	4	Oil, paste	Shrub	0	0	1	0	0	1	0	0	0	0	0	0	0	0	0	0	2	0	0	0	0	0	0	0	0	0	0	0	0
Hopar	Nagar	36.225179°	74.754189°	Kraba/Kavir/Kappar/ChopirShorot	Capparis spinosa L.	Capparaceae	seed, branches	1	Oil, paste	Shrub	0	0	1	0	0	0	0	0	0	0	0	0	0	0	0	0	0	0	0	0	0	0	0	0	0	0	0	0	0
Minapin	Nagar	36.250922°	74.536075°	Kraba/Kavir/Kappar/ChopirShorot	Capparis spinosa L.	Capparaceae	seed, branches	2	Oil, paste	Shrub	0	0	2	0	0	0	0	0	0	0	0	0	0	0	0	0	0	0	0	0	0	0	0	0	0	0	0	0	0
Minapin	Nagar	36.250922°	74.536075°	Kraba/Kavir/Kappar/ChopirShorot	Capparis spinosa L.	Capparaceae	Fruit, root	6	Oil, paste	Shrub	0	0	3	1	0	0	0	0	0	1	0	0	0	0	0	0	0	0	0	1	0	0	0	0	0	0	0	0	0
Minapin	Nagar	36.250922°	74.536075°	Kraba/Kavir/Kappar/ChopirShorot	Capparis spinosa L.	Capparaceae	root, bark, fruit, seed	2	Oil, paste	Shrub	0	0	2	0	0	0	0	0	0	0	0	0	0	0	0	0	0	0	0	0	0	0	0	0	0	0	0	0	0
Minapin	Nagar	36.250922°	74.536075°	Kraba/Kavir/Kappar/ChopirShorot	Capparis spinosa L.	Capparaceae	seed	4	Oil, paste	Shrub	0	0	3	0	0	0	0	0	0	0	1	0	0	0	0	0	0	0	0	0	0	0	0	0	0	0	0	0	0
Nagar Khas	Nagar	36.276377°	74.719955°	Thoonch	Capparis spinosa L.	Capparaceae	seed	4	Oil, paste	Shrub	0	0	3	0	0	0	0	0	0	0	1	0	0	0	0	0	0	0	0	0	0	0	0	0	0	0	0	0	0
Nagar Khas	Nagar	36.276377°	74.719955°	Kraba/Kavir/Kappar/ChopirShorot	Capparis spinosa L.	Capparaceae	floral bud, fruit	4	Oil, paste	Shrub	0	1	0	0	0	1	0	0	0	0	0	0	0	0	0	0	2	0	0	0	0	0	0	0	0	0	0	0	0
Nagar Khas	Nagar	36.276377°	74.719955°	Kraba/Kavir/Kappar/ChopirShorot	Capparis spinosa L.	Capparaceae	root, bark, fruit, seed	2	Oil, paste	Shrub	0	0	2	0	0	0	0	0	0	0	0	0	0	0	0	0	0	0	0	0	0	0	0	0	0	0	0	0	0
Nagar Khas	Nagar	36.276377°	74.719955°	Kraba/Kavir/Kappar/ChopirShorot	Capparis spinosa L.	Capparaceae	root, bark, fruit, seed	2	Oil, paste	Shrub	0	0	2	0	0	0	0	0	0	0	0	0	0	0	0	0	0	0	0	0	0	0	0	0	0	0	0	0	0
Nagar Khas	Nagar	36.276377°	74.719955°	Kraba/Kavir/Kappar/ChopirShorot	Capparis spinosa L.	Capparaceae	floral bud, fruit	4	Oil, paste	Shrub	0	0	1	0	0	1	0	0	0	0	0	0	0	0	0	0	2	0	0	0	0	0	0	0	0	0	0	0	0
Nagar Khas	Nagar	36.276377°	74.719955°	Kraba/Kavir/Kappar/ChopirShorot	Capparis spinosa L.	Capparaceae	seed	4	Oil, paste	Shrub	0	0	3	0	0	0	0	0	0	0	1	0	0	0	0	0	0	0	0	0	0	0	0	0	0	0	0	0	0
Nagar Khas	Nagar	36.276377°	74.719955°	Kraba/Kavir/Kappar/ChopirShorot	Capparis spinosa L.	Capparaceae	Fruit, root	4	Oil, paste	Shrub	0	0	2	1	0	0	0	0	0	0	0	0	0	0	0	0	1	0	0	0	0	0	0	0	0	0	0	0	0
Phekar	Nagar	36.263297°	74.594568°	Kraba/Kavir/Kappar/ChopirShorot	Capparis spinosa L.	Capparaceae	root, bark, fruit, seed	4	Oil, paste	Shrub	0	0	2	0	0	0	0	0	0	0	0	0	0	1	0	0	0	0	1	0	0	0	0	0	0	0	0	0	0
Phekar	Nagar	36.263297°	74.594568°	Kraba/Kavir/Kappar/ChopirShorot	Capparis spinosa L.	Capparaceae	root, bark, fruit, seed	4	Oil, paste	Shrub	0	0	2	0	0	0	0	0	0	0	0	0	0	1	0	0	0	0	1	0	0	0	0	0	0	0	0	0	0
Phekar	Nagar	36.263297°	74.594568°	Kraba/Kavir/Kappar/ChopirShorot	Capparis spinosa L.	Capparaceae	seed	1	Oil, paste	Shrub	0	0	1	0	0	0	0	0	0	0	0	0	0	0	0	0	0	0	0	0	0	0	0	0	0	0	0	0	0
Phekar	Nagar	36.263297°	74.594568°	Kraba/Kavir/Kappar/ChopirShorot	Capparis spinosa L.	Capparaceae	root, bark, fruit, seed	3	Oil, paste	Shrub	0	0	2	0	0	0	0	0	0	0	0	0	0	0	0	0	1	0	0	0	0	0	0	0	0	0	0	0	0
Basho	Skardu	35.469494°	75.359156°	Kraba	Capparis spinosa L.	Capparaceae	seed, branches	3	Oil, powder/grinded, decoction	Shrub	0	0	2	0	0	0	0	0	0	1	0	0	0	0	0	0	0	0	0	0	0	0	0	0	0	0	0	0	0
Basho	Skardu	35.469494°	75.359156°	Shorot	Capparis spinosa L.	Capparaceae	Fruit, root	6	Oil, powder/grinded, decoction	Shrub	0	0	2	2	0	0	0	0	0	1	0	0	0	0	0	0	0	0	0	1	0	0	0	0	0	0	0	0	0
Basho	Skardu	35.469494°	75.359156°	Kraba	Capparis spinosa L.	Capparaceae	seed, branches	3	Oil, powder/grinded, decoction	Shrub	0	0	1	1	0	0	0	0	0	0	0	0	0	0	0	0	0	0	0	1	0	0	0	0	0	0	0	0	0
Basho	Skardu	35.469494°	75.359156°	Kraba	Capparis spinosa L.	Capparaceae	seed, branches	4	Oil, powder/grinded, decoction	Shrub	0	0	3	0	0	0	0	0	0	1	0	0	0	0	0	0	0	0	0	0	0	0	0	0	0	0	0	0	0
Hashupi	Skardu	35.485929°	75.696578°	Kraba	Capparis spinosa L.	Capparaceae	seed, branches	2	Oil, powder/grinded, decoction	Shrub	0	0	1	1	0	0	0	0	0	0	0	0	0	0	0	0	0	0	0	0	0	0	0	0	0	0	0	0	0
Hashupi	Skardu	35.485929°	75.696578°	Shorot	Capparis spinosa L.	Capparaceae	Fruit, root	6	Oil, powder/grinded, decoction	Shrub	0	0	2	2	0	0	0	0	0	1	0	0	0	0	0	0	0	0	0	1	0	0	0	0	0	0	0	0	0
Hashupi	Skardu	35.485929°	75.696578°	Kraba	Capparis spinosa L.	Capparaceae	seed, branches	3	Oil, powder/grinded, decoction	Shrub	0	0	2	1	0	0	0	0	0	0	0	0	0	0	0	0	0	0	0	0	0	0	0	0	0	0	0	0	0
Hashupi	Skardu	35.485929°	75.696578°	Shorot	Capparis spinosa L.	Capparaceae	Fruit, root	6	Oil, powder/grinded, decoction	Shrub	0	0	2	2	0	0	0	0	0	1	0	0	0	0	0	0	0	0	0	1	0	0	0	0	0	0	0	0	0
Hashupi	Skardu	35.485929°	75.696578°	Shorot	Capparis spinosa L.	Capparaceae	Fruit, root	5	Oil, powder/grinded, decoction	Shrub	0	0	1	2	0	0	0	0	0	1	0	0	0	0	0	0	0	0	0	1	0	0	0	0	0	0	0	0	0
Hashupi	Skardu	35.485929°	75.696578°	Shorot	Capparis spinosa L.	Capparaceae	Fruit, root	4	Oil, powder/grinded, decoction	Shrub	0	0	1	1	0	0	0	0	0	1	0	0	0	0	0	0	0	0	0	1	0	0	0	0	0	0	0	0	0
Hosho	Skardu	35.345214°	75.515283°	Kraba	Capparis spinosa L.	Capparaceae	seed, branches	5	Oil, powder/grinded, decoction	Shrub	0	0	2	1	0	0	0	0	0	1	0	0	0	0	0	0	0	0	0	1	0	0	0	0	0	0	0	0	0
Thowar	Skardu	35.609167°	75.203611°	Shorot	Capparis spinosa L.	Capparaceae	Fruit, root	4	Oil, powder/grinded, decoction	Shrub	0	0	2	1	0	0	0	0	0	0	0	0	0	0	0	0	0	0	0	1	0	0	0	0	0	0	0	0	0
Thowar	Skardu	35.609167°	75.203611°	Shorot	Capparis spinosa L.	Capparaceae	Fruit, root	3	Oil, powder/grinded, decoction	Shrub	0	0	2	0	0	0	0	0	0	0	0	0	0	0	0	0	0	0	0	1	0	0	0	0	0	0	0	0	0
Aliabad	Hunza	36.308563°	74.619496°	Ma'rooch	Capsicum annuum L.	Solanaceae	Fruit	4	Direct	Shrub	0	0	2	2	0	0	0	0	0	0	0	0	0	0	0	0	0	0	0	0	0	0	0	0	0	0	0	0	0
Aliabad	Hunza	36.308563°	74.619496°	Ma'rooch	Capsicum annuum L.	Solanaceae	Fruit	4	Direct	Shrub	0	0	2	2	0	0	0	0	0	0	0	0	0	0	0	0	0	0	0	0	0	0	0	0	0	0	0	0	0
Aliabad	Hunza	36.308563°	74.619496°	Ma'rooch	Capsicum annuum L.	Solanaceae	Fruit	4	Direct	Shrub	0	0	2	2	0	0	0	0	0	0	0	0	0	0	0	0	0	0	0	0	0	0	0	0	0	0	0	0	0
Aliabad	Hunza	36.308563°	74.619496°	Ma'rooch	Capsicum annuum L.	Solanaceae	Fruit	4	Direct	Shrub	0	0	2	2	0	0	0	0	0	0	0	0	0	0	0	0	0	0	0	0	0	0	0	0	0	0	0	0	0
Aliabad	Hunza	36.308563°	74.619496°	Ma'rooch	Capsicum annuum L.	Solanaceae	Fruit	4	Direct	Shrub	0	0	2	2	0	0	0	0	0	0	0	0	0	0	0	0	0	0	0	0	0	0	0	0	0	0	0	0	0
Aliabad	Hunza	36.308563°	74.619496°	Ma'rooch	Capsicum annuum L.	Solanaceae	Fruit	4	Direct	Shrub	0	0	2	2	0	0	0	0	0	0	0	0	0	0	0	0	0	0	0	0	0	0	0	0	0	0	0	0	0
Aliabad	Hunza	36.308563°	74.619496°	Ma'rooch	Capsicum annuum L.	Solanaceae	Fruit	4	Direct	Shrub	0	0	2	2	0	0	0	0	0	0	0	0	0	0	0	0	0	0	0	0	0	0	0	0	0	0	0	0	0
Altit	Hunza	36.316102°	74.681835°	Ma'rooch	Capsicum annuum L.	Solanaceae	Fruit	4	Direct	Shrub	0	0	2	2	0	0	0	0	0	0	0	0	0	0	0	0	0	0	0	0	0	0	0	0	0	0	0	0	0
Altit	Hunza	36.316102°	74.681835°	Ma'rooch	Capsicum annuum L.	Solanaceae	Fruit	4	Direct	Shrub	0	0	2	2	0	0	0	0	0	0	0	0	0	0	0	0	0	0	0	0	0	0	0	0	0	0	0	0	0
Altit	Hunza	36.316102°	74.681835°	Ma'rooch	Capsicum annuum L.	Solanaceae	Fruit	4	Direct	Shrub	0	0	2	2	0	0	0	0	0	0	0	0	0	0	0	0	0	0	0	0	0	0	0	0	0	0	0	0	0
Altit	Hunza	36.316102°	74.681835°	Ma'rooch	Capsicum annuum L.	Solanaceae	Fruit	4	Direct	Shrub	0	0	2	2	0	0	0	0	0	0	0	0	0	0	0	0	0	0	0	0	0	0	0	0	0	0	0	0	0
Altit	Hunza	36.316102°	74.681835°	Ma'rooch	Capsicum annuum L.	Solanaceae	Fruit	4	Direct	Shrub	0	0	2	2	0	0	0	0	0	0	0	0	0	0	0	0	0	0	0	0	0	0	0	0	0	0	0	0	0
Karimabad	Hunza	36.326408°	74.664316°	Ma'rooch	Capsicum annuum L.	Solanaceae	Fruit	4	Direct	Shrub	0	0	2	2	0	0	0	0	0	0	0	0	0	0	0	0	0	0	0	0	0	0	0	0	0	0	0	0	0
Karimabad	Hunza	36.326408°	74.664316°	Ma'rooch	Capsicum annuum L.	Solanaceae	Fruit	4	Direct	Shrub	0	0	2	2	0	0	0	0	0	0	0	0	0	0	0	0	0	0	0	0	0	0	0	0	0	0	0	0	0
Karimabad	Hunza	36.326408°	74.664316°	Ma'rooch	Capsicum annuum L.	Solanaceae	Fruit	4	Direct	Shrub	0	0	2	2	0	0	0	0	0	0	0	0	0	0	0	0	0	0	0	0	0	0	0	0	0	0	0	0	0
Murtazaabad	Hunza	36.285517°	74.607833°	Ma'rooch	Capsicum annuum L.	Solanaceae	Fruit	4	Direct	Shrub	0	0	2	2	0	0	0	0	0	0	0	0	0	0	0	0	0	0	0	0	0	0	0	0	0	0	0	0	0
Murtazaabad	Hunza	36.285517°	74.607833°	Ma'rooch	Capsicum annuum L.	Solanaceae	Fruit	4	Direct	Shrub	0	0	2	2	0	0	0	0	0	0	0	0	0	0	0	0	0	0	0	0	0	0	0	0	0	0	0	0	0
Murtazaabad	Hunza	36.285517°	74.607833°	Ma'rooch	Capsicum annuum L.	Solanaceae	Fruit	4	Direct	Shrub	0	0	2	2	0	0	0	0	0	0	0	0	0	0	0	0	0	0	0	0	0	0	0	0	0	0	0	0	0
Ghulmit	Nagar	36.241766°	74.462110°	Marooch	Capsicum annuum L.	Solanaceae	Fruit	3	Direct	Shrub	1	0	1	1	0	0	0	0	0	0	0	0	0	0	0	0	0	0	0	0	0	0	0	0	0	0	0	0	0
Ghulmit	Nagar	36.241766°	74.462110°	Marooch	Capsicum annuum L.	Solanaceae	Fruit	3	Direct	Shrub	0	0	1	2	0	0	0	0	0	0	0	0	0	0	0	0	0	0	0	0	0	0	0	0	0	0	0	0	0
Minapin	Nagar	36.250922°	74.536075°	Marooch	Capsicum annuum L.	Solanaceae	Fruit	4	Direct	Shrub	1	0	1	2	0	0	0	0	0	0	0	0	0	0	0	0	0	0	0	0	0	0	0	0	0	0	0	0	0
Minapin	Nagar	36.250922°	74.536075°	Marooch	Capsicum annuum L.	Solanaceae	Fruit	3	Direct	Shrub	0	0	1	2	0	0	0	0	0	0	0	0	0	0	0	0	0	0	0	0	0	0	0	0	0	0	0	0	0
Nagar Khas	Nagar	36.276377°	74.719955°	Marooch	Capsicum annuum L.	Solanaceae	Fruit	2	Direct	Shrub	0	0	1	1	0	0	0	0	0	0	0	0	0	0	0	0	0	0	0	0	0	0	0	0	0	0	0	0	0
Nagar Khas	Nagar	36.276377°	74.719955°	Marooch	Capsicum annuum L.	Solanaceae	Fruit	4	Direct	Shrub	1	0	1	2	0	0	0	0	0	0	0	0	0	0	0	0	0	0	0	0	0	0	0	0	0	0	0	0	0
Phekar	Nagar	36.263297°	74.594568°	Marooch	Capsicum annuum L.	Solanaceae	Fruit	4	Direct	Shrub	1	0	1	2	0	0	0	0	0	0	0	0	0	0	0	0	0	0	0	0	0	0	0	0	0	0	0	0	0
Phekar	Nagar	36.263297°	74.594568°	Marooch	Capsicum annuum L.	Solanaceae	Fruit	3	Direct	Shrub	0	0	1	2	0	0	0	0	0	0	0	0	0	0	0	0	0	0	0	0	0	0	0	0	0	0	0	0	0
Phekar	Nagar	36.263297°	74.594568°	Marooch	Capsicum annuum L.	Solanaceae	Fruit	3	Direct	Shrub	1	0	1	1	0	0	0	0	0	0	0	0	0	0	0	0	0	0	0	0	0	0	0	0	0	0	0	0	0
Bilchar/Bagrote	Gilgit	35.942517°	74.545274°	Hapoocho	Caragana brevifolia Kom.	Leguminosae	root	2	Direct, decoction	Shrub	0	0	0	0	0	0	2	0	0	0	0	0	0	0	0	0	0	0	0	0	0	0	0	0	0	0	0	0	0
Bilchar/Bagrote	Gilgit	35.942517°	74.545274°	Hapoocho	Caragana brevifolia Kom.	Leguminosae	root	1	Direct, decoction	Shrub	0	0	0	0	0	0	1	0	0	0	0	0	0	0	0	0	0	0	0	0	0	0	0	0	0	0	0	0	0
Bilchar/Bagrote	Gilgit	35.942517°	74.545274°	Hapoocho	Caragana brevifolia Kom.	Leguminosae	root	1	Direct, decoction	Shrub	0	0	0	0	0	0	1	0	0	0	0	0	0	0	0	0	0	0	0	0	0	0	0	0	0	0	0	0	0
Bilchar/Bagrote	Gilgit	35.942517°	74.545274°	Hapoocho	Caragana brevifolia Kom.	Leguminosae	root	1	Direct, decoction	Shrub	0	0	0	0	0	0	1	0	0	0	0	0	0	0	0	0	0	0	0	0	0	0	0	0	0	0	0	0	0
Bilchar/Bagrote	Gilgit	35.942517°	74.545274°	Hapoocho	Caragana brevifolia Kom.	Leguminosae	root	1	Direct, decoction	Shrub	0	0	0	0	0	0	1	0	0	0	0	0	0	0	0	0	0	0	0	0	0	0	0	0	0	0	0	0	0
Danyore	Gilgit	35.919880°	74.386181°	Hapoocho	Caragana brevifolia Kom.	Leguminosae	root	2	Direct, decoction	Shrub	0	0	0	0	0	0	2	0	0	0	0	0	0	0	0	0	0	0	0	0	0	0	0	0	0	0	0	0	0
Danyore	Gilgit	35.919880°	74.386181°	Hapoocho	Caragana brevifolia Kom.	Leguminosae	root	1	Direct, decoction	Shrub	0	0	0	0	0	0	1	0	0	0	0	0	0	0	0	0	0	0	0	0	0	0	0	0	0	0	0	0	0
Danyore	Gilgit	35.919880°	74.386181°	Hapoocho	Caragana brevifolia Kom.	Leguminosae	root	1	Direct, decoction	Shrub	0	0	0	0	0	0	1	0	0	0	0	0	0	0	0	0	0	0	0	0	0	0	0	0	0	0	0	0	0
Danyore	Gilgit	35.919880°	74.386181°	Hapoocho	Caragana brevifolia Kom.	Leguminosae	root	1	Direct, decoction	Shrub	0	0	0	0	0	0	1	0	0	0	0	0	0	0	0	0	0	0	0	0	0	0	0	0	0	0	0	0	0
Jalalabad	Gilgit	35.880457°	74.493590°	Hapoocho	Caragana brevifolia Kom.	Leguminosae	root	2	Direct, decoction	Shrub	0	0	0	0	0	0	2	0	0	0	0	0	0	0	0	0	0	0	0	0	0	0	0	0	0	0	0	0	0
Jalalabad	Gilgit	35.880457°	74.493590°	Hapoocho	Caragana brevifolia Kom.	Leguminosae	root	1	Direct, decoction	Shrub	0	0	0	0	0	0	1	0	0	0	0	0	0	0	0	0	0	0	0	0	0	0	0	0	0	0	0	0	0
Jalalabad	Gilgit	35.880457°	74.493590°	Hapoocho	Caragana brevifolia Kom.	Leguminosae	root	1	Direct, decoction	Shrub	0	0	0	0	0	0	1	0	0	0	0	0	0	0	0	0	0	0	0	0	0	0	0	0	0	0	0	0	0
Jalalabad	Gilgit	35.880457°	74.493590°	Hapoocho	Caragana brevifolia Kom.	Leguminosae	root	1	Direct, decoction	Shrub	0	0	0	0	0	0	1	0	0	0	0	0	0	0	0	0	0	0	0	0	0	0	0	0	0	0	0	0	0
Jalalabad	Gilgit	35.880457°	74.493590°	Hapoocho	Caragana brevifolia Kom.	Leguminosae	root	1	Direct, decoction	Shrub	0	0	0	0	0	0	1	0	0	0	0	0	0	0	0	0	0	0	0	0	0	0	0	0	0	0	0	0	0
Bilchar/Bagrote	Gilgit	35.942517°	74.545274°	Hapoocho	Caragana tragacanthoides var. himalaica Komarov	Papilionaceae	root	2	Direct, decoction	Shrub	0	0	0	0	0	0	2	0	0	0	0	0	0	0	0	0	0	0	0	0	0	0	0	0	0	0	0	0	0
Bilchar/Bagrote	Gilgit	35.942517°	74.545274°	Hapoocho	Caragana tragacanthoides var. himalaica Komarov	Papilionaceae	root	2	Direct, decoction	Shrub	0	0	0	0	0	0	2	0	0	0	0	0	0	0	0	0	0	0	0	0	0	0	0	0	0	0	0	0	0
Bilchar/Bagrote	Gilgit	35.942517°	74.545274°	Hapoocho	Caragana tragacanthoides var. himalaica Komarov	Papilionaceae	root	2	Direct, decoction	Shrub	0	0	0	0	0	0	2	0	0	0	0	0	0	0	0	0	0	0	0	0	0	0	0	0	0	0	0	0	0
Bilchar/Bagrote	Gilgit	35.942517°	74.545274°	Hapoocho	Caragana tragacanthoides var. himalaica Komarov	Papilionaceae	root	2	Direct, decoction	Shrub	0	0	0	0	0	0	2	0	0	0	0	0	0	0	0	0	0	0	0	0	0	0	0	0	0	0	0	0	0
Bilchar/Bagrote	Gilgit	35.942517°	74.545274°	Hapoocho	Caragana tragacanthoides var. himalaica Komarov	Papilionaceae	root	2	Direct, decoction	Shrub	0	0	0	0	0	0	2	0	0	0	0	0	0	0	0	0	0	0	0	0	0	0	0	0	0	0	0	0	0
Danyore	Gilgit	35.919880°	74.386181°	Hapoocho	Caragana tragacanthoides var. himalaica Komarov	Papilionaceae	root	2	Direct, decoction	Shrub	0	0	0	0	0	0	2	0	0	0	0	0	0	0	0	0	0	0	0	0	0	0	0	0	0	0	0	0	0
Danyore	Gilgit	35.919880°	74.386181°	Hapoocho	Caragana tragacanthoides var. himalaica Komarov	Papilionaceae	root	2	Direct, decoction	Shrub	0	0	0	0	0	0	2	0	0	0	0	0	0	0	0	0	0	0	0	0	0	0	0	0	0	0	0	0	0
Danyore	Gilgit	35.919880°	74.386181°	Hapoocho	Caragana tragacanthoides var. himalaica Komarov	Papilionaceae	root	2	Direct, decoction	Shrub	0	0	0	0	0	0	2	0	0	0	0	0	0	0	0	0	0	0	0	0	0	0	0	0	0	0	0	0	0
Jalalabad	Gilgit	35.880457°	74.493590°	Hapoocho	Caragana tragacanthoides var. himalaica Komarov	Papilionaceae	root	2	Direct, decoction	Shrub	0	0	0	0	0	0	2	0	0	0	0	0	0	0	0	0	0	0	0	0	0	0	0	0	0	0	0	0	0
Jalalabad	Gilgit	35.880457°	74.493590°	Hapoocho	Caragana tragacanthoides var. himalaica Komarov	Papilionaceae	root	1	Direct, decoction	Shrub	0	0	0	0	0	0	1	0	0	0	0	0	0	0	0	0	0	0	0	0	0	0	0	0	0	0	0	0	0
Jalalabad	Gilgit	35.880457°	74.493590°	Hapoocho	Caragana tragacanthoides var. himalaica Komarov	Papilionaceae	root	2	Direct, decoction	Shrub	0	0	0	0	0	0	2	0	0	0	0	0	0	0	0	0	0	0	0	0	0	0	0	0	0	0	0	0	0
Jalalabad	Gilgit	35.880457°	74.493590°	Hapoocho	Caragana tragacanthoides var. himalaica Komarov	Papilionaceae	root	2	Direct, decoction	Shrub	0	0	0	0	0	0	2	0	0	0	0	0	0	0	0	0	0	0	0	0	0	0	0	0	0	0	0	0	0
Jalalabad	Gilgit	35.880457°	74.493590°	Hapoocho	Caragana tragacanthoides var. himalaica Komarov	Papilionaceae	root	2	Direct, decoction	Shrub	0	0	0	0	0	0	2	0	0	0	0	0	0	0	0	0	0	0	0	0	0	0	0	0	0	0	0	0	0
Jalalabad	Gilgit	35.880457°	74.493590°	Hapoocho	Caragana tragacanthoides var. himalaica Komarov	Papilionaceae	root	2	Direct, decoction	Shrub	0	0	0	0	0	0	2	0	0	0	0	0	0	0	0	0	0	0	0	0	0	0	0	0	0	0	0	0	0
Gahkuch	Ghizer	36.162949°	73.755492°	Pock	Carthamus tinctorius L.	Compositae	flower, seed	9	Oil, decoction	Herb	0	1	1	0	1	0	0	2	1	0	0	0	0	0	0	0	0	0	1	1	0	0	0	1	0	0	0	0	0
Gahkuch	Ghizer	36.162949°	73.755492°	Pock	Carthamus tinctorius L.	Compositae	flower, seed	6	Oil, decoction	Herb	0	2	1	0	0	0	0	1	1	0	0	0	0	0	0	0	0	0	0	0	0	0	0	1	0	0	0	0	0
Gahkuch	Ghizer	36.162949°	73.755492°	Pock	Carthamus tinctorius L.	Compositae	flower, seed	5	Oil, decoction	Herb	0	2	1	0	0	0	0	1	1	0	0	0	0	0	0	0	0	0	0	0	0	0	0	0	0	0	0	0	0
Gahkuch	Ghizer	36.162949°	73.755492°	Pock	Carthamus tinctorius L.	Compositae	flower, seed	5	Oil, decoction	Herb	0	2	1	0	0	0	0	1	1	0	0	0	0	0	0	0	0	0	0	0	0	0	0	0	0	0	0	0	0
Gahkuch	Ghizer	36.162949°	73.755492°	Pock	Carthamus tinctorius L.	Compositae	flower, seed	6	Oil, decoction	Herb	0	2	1	0	0	0	0	2	1	0	0	0	0	0	0	0	0	0	0	0	0	0	0	0	0	0	0	0	0
Gahkuch	Ghizer	36.162949°	73.755492°	Pock	Carthamus tinctorius L.	Compositae	flower, seed	5	Oil, decoction	Herb	0	0	0	0	1	0	0	1	0	0	0	0	0	0	0	0	0	0	1	1	0	0	0	1	0	0	0	0	0
Gahkuch	Ghizer	36.162949°	73.755492°	Pock	Carthamus tinctorius L.	Compositae	flower, seed	7	Oil, decoction	Herb	0	2	1	0	0	0	0	2	1	0	0	0	0	0	0	0	0	0	0	0	0	0	0	1	0	0	0	0	0
Yaseen	Ghizer	36.369354°	73.332552°	Pock	Carthamus tinctorius L.	Compositae	flower, seed	8	Oil, decoction	Herb	0	1	1	0	1	0	0	2	0	0	0	0	0	0	0	0	0	0	1	1	0	0	0	1	0	0	0	0	0
Yaseen	Ghizer	36.369354°	73.332552°	Pock	Carthamus tinctorius L.	Compositae	flower, seed	5	Oil, decoction	Herb	0	2	1	0	0	0	0	1	1	0	0	0	0	0	0	0	0	0	0	0	0	0	0	0	0	0	0	0	0
Yaseen	Ghizer	36.369354°	73.332552°	Pock	Carthamus tinctorius L.	Compositae	flower, seed	6	Oil, decoction	Herb	0	1	0	0	1	0	0	1	0	0	0	0	0	0	0	0	0	0	1	1	0	0	0	1	0	0	0	0	0
Yaseen	Ghizer	36.369354°	73.332552°	Pock	Carthamus tinctorius L.	Compositae	flower, seed	6	Oil, decoction	Herb	0	2	1	0	0	0	0	1	1	0	0	0	0	0	0	0	0	0	0	0	0	0	0	1	0	0	0	0	0
Yaseen	Ghizer	36.369354°	73.332552°	Pock	Carthamus tinctorius L.	Compositae	flower, seed	7	Oil, decoction	Herb	0	1	0	0	1	0	0	2	0	0	0	0	0	0	0	0	0	0	1	1	0	0	0	1	0	0	0	0	0
Yaseen	Ghizer	36.369354°	73.332552°	Pock	Carthamus tinctorius L.	Compositae	flower, seed	7	Oil, decoction	Herb	0	1	0	0	1	0	0	1	1	0	0	0	0	0	0	0	0	0	1	1	0	0	0	1	0	0	0	0	0
Yaseen	Ghizer	36.369354°	73.332552°	Pock	Carthamus tinctorius L.	Compositae	flower, seed	7	Oil, decoction	Herb	0	0	1	0	1	0	0	1	1	0	0	0	0	0	0	0	0	0	1	1	0	0	0	1	0	0	0	0	0
Aliabad	Hunza	36.308563°	74.619496°	Poong	Carthamus tinctorius L.	Compositae	flower, seed	5	Oil, decoction	Herb	1	0	1	0	0	0	0	0	2	0	0	0	0	1	0	0	0	0	0	0	0	0	0	0	0	0	0	0	0
Aliabad	Hunza	36.308563°	74.619496°	Poong	Carthamus tinctorius L.	Compositae	flower, seed	4	Oil, decoction	Herb	1	1	0	0	0	0	0	0	2	0	0	0	0	0	0	0	0	0	0	0	0	0	0	0	0	0	0	0	0
Aliabad	Hunza	36.308563°	74.619496°	Poong	Carthamus tinctorius L.	Compositae	dried petal	3	Oil, decoction	Herb	0	1	1	0	0	0	0	0	0	0	0	0	0	0	0	0	0	1	0	0	0	0	0	0	0	0	0	0	0
Aliabad	Hunza	36.308563°	74.619496°	Poong	Carthamus tinctorius L.	Compositae	dried petal	5	Oil, decoction	Herb	1	0	1	0	0	0	0	0	2	0	0	0	0	1	0	0	0	0	0	0	0	0	0	0	0	0	0	0	0
Aliabad	Hunza	36.308563°	74.619496°	Poong	Carthamus tinctorius L.	Compositae	dried petal	4	Oil, decoction	Herb	1	1	0	0	0	0	0	0	2	0	0	0	0	0	0	0	0	0	0	0	0	0	0	0	0	0	0	0	0
Aliabad	Hunza	36.308563°	74.619496°	Poong	Carthamus tinctorius L.	Compositae	dried petal	3	Oil, decoction	Herb	0	1	1	0	0	0	0	0	0	0	0	0	0	0	0	0	0	1	0	0	0	0	0	0	0	0	0	0	0
Aliabad	Hunza	36.308563°	74.619496°	Poong	Carthamus tinctorius L.	Compositae	flower, seed	6	Oil, decoction	Herb	1	1	1	0	0	0	0	0	2	0	0	0	0	1	0	0	0	0	0	0	0	0	0	0	0	0	0	0	0
Altit	Hunza	36.316102°	74.681835°	Poong	Carthamus tinctorius L.	Compositae	flower, seed	4	Oil, decoction	Herb	1	1	0	0	0	0	0	0	2	0	0	0	0	0	0	0	0	0	0	0	0	0	0	0	0	0	0	0	0
Altit	Hunza	36.316102°	74.681835°	Poong	Carthamus tinctorius L.	Compositae	dried petal	3	Oil, decoction	Herb	0	1	1	0	0	0	0	0	0	0	0	0	0	0	0	0	0	1	0	0	0	0	0	0	0	0	0	0	0
Altit	Hunza	36.316102°	74.681835°	Poong	Carthamus tinctorius L.	Compositae	flower, seed	5	Oil, decoction	Herb	1	0	1	0	0	0	0	0	2	0	0	0	0	1	0	0	0	0	0	0	0	0	0	0	0	0	0	0	0
Altit	Hunza	36.316102°	74.681835°	Poong	Carthamus tinctorius L.	Compositae	flower, seed	4	Oil, decoction	Herb	1	1	0	0	0	0	0	0	2	0	0	0	0	0	0	0	0	0	0	0	0	0	0	0	0	0	0	0	0
Altit	Hunza	36.316102°	74.681835°	Poong	Carthamus tinctorius L.	Compositae	flower, seed	5	Oil, decoction	Herb	1	0	1	0	0	0	0	0	2	0	0	0	0	1	0	0	0	0	0	0	0	0	0	0	0	0	0	0	0
Karimabad	Hunza	36.326408°	74.664316°	Poong	Carthamus tinctorius L.	Compositae	flower, seed	6	Oil, decoction	Herb	1	1	1	0	0	0	0	0	2	0	0	0	0	1	0	0	0	0	0	0	0	0	0	0	0	0	0	0	0
Karimabad	Hunza	36.326408°	74.664316°	Poong	Carthamus tinctorius L.	Compositae	flower, seed	4	Oil, decoction	Herb	1	1	0	0	0	0	0	0	2	0	0	0	0	0	0	0	0	0	0	0	0	0	0	0	0	0	0	0	0
Karimabad	Hunza	36.326408°	74.664316°	Poong	Carthamus tinctorius L.	Compositae	dried petal	4	Oil, decoction	Herb	1	1	0	0	0	0	0	0	2	0	0	0	0	0	0	0	0	0	0	0	0	0	0	0	0	0	0	0	0
Karimabad	Hunza	36.326408°	74.664316°	Poong	Carthamus tinctorius L.	Compositae	dried petal	3	Oil, decoction	Herb	0	1	1	0	0	0	0	0	0	0	0	0	0	0	0	0	0	1	0	0	0	0	0	0	0	0	0	0	0
Murtazaabad	Hunza	36.285517°	74.607833°	Poong	Carthamus tinctorius L.	Compositae	dried petal	3	Oil, decoction	Herb	0	1	1	0	0	0	0	0	0	0	0	0	0	0	0	0	0	1	0	0	0	0	0	0	0	0	0	0	0
Murtazaabad	Hunza	36.285517°	74.607833°	Poong	Carthamus tinctorius L.	Compositae	flower, seed	3	Oil, decoction	Herb	0	1	1	0	0	0	0	0	0	0	0	0	0	0	0	0	0	1	0	0	0	0	0	0	0	0	0	0	0
Murtazaabad	Hunza	36.285517°	74.607833°	Poong	Carthamus tinctorius L.	Compositae	dried petal	5	Oil, decoction	Herb	1	0	1	0	0	0	0	0	2	0	0	0	0	1	0	0	0	0	0	0	0	0	0	0	0	0	0	0	0
Murtazaabad	Hunza	36.285517°	74.607833°	Poong	Carthamus tinctorius L.	Compositae	flower, seed	3	Oil, decoction	Herb	0	1	1	0	0	0	0	0	0	0	0	0	0	0	0	0	0	1	0	0	0	0	0	0	0	0	0	0	0
Gahkuch	Ghizer	36.162949°	73.755492°	Hayyo	Carum carvi L.	Apiaceae	seed, fruit	4	Decoction, powder/grinded, direct	Herb	0	0	0	0	0	3	0	1	0	0	0	0	0	0	0	0	0	0	0	0	0	0	0	0	0	0	0	0	0
Gahkuch	Ghizer	36.162949°	73.755492°	Hayyo	Carum carvi L.	Apiaceae	seed, fruit	4	Decoction, powder/grinded, direct	Herb	0	0	0	0	0	3	0	1	0	0	0	0	0	0	0	0	0	0	0	0	0	0	0	0	0	0	0	0	0
Yaseen	Ghizer	36.369354°	73.332552°	Hayyo	Carum carvi L.	Apiaceae	seed, fruit	3	Decoction, powder/grinded, direct	Herb	0	0	0	0	0	2	0	1	0	0	0	0	0	0	0	0	0	0	0	0	0	0	0	0	0	0	0	0	0
Yaseen	Ghizer	36.369354°	73.332552°	Hayyo	Carum carvi L.	Apiaceae	seed, fruit	3	Decoction, powder/grinded, direct	Herb	0	0	0	0	0	3	0	0	0	0	0	0	0	0	0	0	0	0	0	0	0	0	0	0	0	0	0	0	0
Yaseen	Ghizer	36.369354°	73.332552°	Hayyo	Carum carvi L.	Apiaceae	seed, fruit	3	Decoction, powder/grinded, direct	Herb	0	0	0	0	0	3	0	0	0	0	0	0	0	0	0	0	0	0	0	0	0	0	0	0	0	0	0	0	0
Yaseen	Ghizer	36.369354°	73.332552°	Hayyo	Carum carvi L.	Apiaceae	seed, fruit	3	Decoction, powder/grinded, direct	Herb	0	0	0	0	0	2	0	1	0	0	0	0	0	0	0	0	0	0	0	0	0	0	0	0	0	0	0	0	0
Yaseen	Ghizer	36.369354°	73.332552°	Hayyo	Carum carvi L.	Apiaceae	seed, fruit	2	Decoction, powder/grinded, direct	Herb	0	0	0	0	0	1	0	1	0	0	0	0	0	0	0	0	0	0	0	0	0	0	0	0	0	0	0	0	0
Yaseen	Ghizer	36.369354°	73.332552°	Hayyo	Carum carvi L.	Apiaceae	seed, fruit	2	Decoction, powder/grinded, direct	Herb	0	0	0	0	0	1	0	1	0	0	0	0	0	0	0	0	0	0	0	0	0	0	0	0	0	0	0	0	0
Kargha	Gilgit	35.915251°	74.257648°	Filizooh	Carum carvi L.	Apiaceae	Seed	3	Decoction, powder/grinded	Herb	0	0	0	1	0	0	0	2	0	0	0	0	0	0	0	0	0	0	0	0	0	0	0	0	0	0	0	0	0
Kargha	Gilgit	35.915251°	74.257648°	Filizooh	Carum carvi L.	Apiaceae	Seed	6	Decoction, powder/grinded	Herb	2	0	0	1	0	0	0	3	0	0	0	0	0	0	0	0	0	0	0	0	0	0	0	0	0	0	0	0	0
Kargha	Gilgit	35.915251°	74.257648°	Filizooh	Carum carvi L.	Apiaceae	Seed	6	Decoction, powder/grinded	Herb	2	0	0	1	0	0	0	3	0	0	0	0	0	0	0	0	0	0	0	0	0	0	0	0	0	0	0	0	0
Kargha	Gilgit	35.915251°	74.257648°	Filizooh	Carum carvi L.	Apiaceae	Seed	5	Decoction, powder/grinded	Herb	2	0	0	1	0	0	0	2	0	0	0	0	0	0	0	0	0	0	0	0	0	0	0	0	0	0	0	0	0
Kargha	Gilgit	35.915251°	74.257648°	Filizooh	Carum carvi L.	Apiaceae	Seed	3	Decoction, powder/grinded	Herb	0	0	0	1	0	0	0	2	0	0	0	0	0	0	0	0	0	0	0	0	0	0	0	0	0	0	0	0	0
Rahimabad	Gilgit	36.118837°	74.297376°	Filizooh	Carum carvi L.	Apiaceae	Seed	6	Decoction, powder/grinded	Herb	2	0	0	1	0	0	0	3	0	0	0	0	0	0	0	0	0	0	0	0	0	0	0	0	0	0	0	0	0
Basho	Skardu	35.469494°	75.359156°	Zera	Carum carvi L.	Apiaceae	seed	1	Decoction, powder/grinded	Herb	0	0	0	0	0	0	0	1	0	0	0	0	0	0	0	0	0	0	0	0	0	0	0	0	0	0	0	0	0
Basho	Skardu	35.469494°	75.359156°	Zera	Carum carvi L.	Apiaceae	seed	3	Decoction, powder/grinded	Herb	0	0	1	0	0	0	0	1	0	0	0	0	0	0	0	0	1	0	0	0	0	0	0	0	0	0	0	0	0
Hashupi	Skardu	35.485929°	75.696578°	Zera	Carum carvi L.	Apiaceae	seed	3	Decoction, powder/grinded	Herb	0	0	1	0	0	0	0	1	0	0	0	0	0	0	0	0	1	0	0	0	0	0	0	0	0	0	0	0	0
Hashupi	Skardu	35.485929°	75.696578°	Zera	Carum carvi L.	Apiaceae	seed	2	Decoction, powder/grinded	Herb	0	0	0	0	0	0	0	1	0	0	0	0	0	0	0	0	1	0	0	0	0	0	0	0	0	0	0	0	0
Hashupi	Skardu	35.485929°	75.696578°	Zera	Carum carvi L.	Apiaceae	seed	3	Decoction, powder/grinded	Herb	0	0	1	0	0	0	0	1	0	0	0	0	0	0	0	0	1	0	0	0	0	0	0	0	0	0	0	0	0
Hashupi	Skardu	35.485929°	75.696578°	Zera	Carum carvi L.	Apiaceae	seed	1	Decoction, powder/grinded	Herb	0	0	0	0	0	0	0	1	0	0	0	0	0	0	0	0	0	0	0	0	0	0	0	0	0	0	0	0	0
Eidgah	Astore	35.347049°	74.857882°	Bloghar	Cerastium fontanum Baumg.	Caryophyllaceae	whole plant	3	Direct	Herb	0	0	0	0	0	0	0	0	2	0	0	0	0	0	0	0	1	0	0	0	0	0	0	0	0	0	0	0	0
Gorikot	Astore	35.281969°	74.841940°	Bloghar	Cerastium fontanum Baumg.	Caryophyllaceae	whole plant	1	Direct	Herb	0	0	0	0	0	0	0	0	1	0	0	0	0	0	0	0	0	0	0	0	0	0	0	0	0	0	0	0	0
Gorikot	Astore	35.281969°	74.841940°	Bloghar	Cerastium fontanum Baumg.	Caryophyllaceae	whole plant	2	Direct	Herb	0	0	0	0	0	0	0	0	1	0	0	0	0	0	0	0	1	0	0	0	0	0	0	0	0	0	0	0	0
Gorikot	Astore	35.281969°	74.841940°	Bloghar	Cerastium fontanum Baumg.	Caryophyllaceae	whole plant	3	Direct	Herb	0	0	0	0	0	0	0	0	2	0	0	0	0	0	0	0	1	0	0	0	0	0	0	0	0	0	0	0	0
Jaglot	Astore	35.685000°	74.623889°	Bloghar	Cerastium fontanum Baumg.	Caryophyllaceae	whole plant	3	Direct	Herb	0	0	0	0	0	0	0	0	2	0	0	0	0	0	0	0	1	0	0	0	0	0	0	0	0	0	0	0	0
Rattu	Astore	35.168461°	74.791752°1	Bloghar	Cerastium fontanum Baumg.	Caryophyllaceae	whole plant	2	Direct	Herb	0	0	0	0	0	0	0	0	1	0	0	0	0	0	0	0	1	0	0	0	0	0	0	0	0	0	0	0	0
Rattu	Astore	35.168461°	74.791752°1	Bloghar	Cerastium fontanum Baumg.	Caryophyllaceae	whole plant	3	Direct	Herb	0	0	0	0	0	0	0	0	2	0	0	0	0	0	0	0	1	0	0	0	0	0	0	0	0	0	0	0	0
Kargha	Gilgit	35.915251°	74.257648°	Bloghar	Cerastium fontanum Baumg.	Caryophyllaceae	whole plant	4	Direct	Herb	0	0	0	0	0	0	0	0	2	0	0	0	0	0	0	0	2	0	0	0	0	0	0	0	0	0	0	0	0
Kargha	Gilgit	35.915251°	74.257648°	Bloghar	Cerastium fontanum Baumg.	Caryophyllaceae	whole plant	4	Direct	Herb	0	0	0	0	0	0	0	0	2	0	0	0	0	0	0	0	2	0	0	0	0	0	0	0	0	0	0	0	0
Kargha	Gilgit	35.915251°	74.257648°	Bloghar	Cerastium fontanum Baumg.	Caryophyllaceae	whole plant	4	Direct	Herb	0	0	0	0	0	0	0	0	2	0	0	0	0	0	0	0	2	0	0	0	0	0	0	0	0	0	0	0	0
Rahimabad	Gilgit	36.118837°	74.297376°	Bloghar	Cerastium fontanum Baumg.	Caryophyllaceae	whole plant	4	Direct	Herb	0	0	0	0	0	0	0	0	2	0	0	0	0	0	0	0	2	0	0	0	0	0	0	0	0	0	0	0	0
Rahimabad	Gilgit	36.118837°	74.297376°	Bloghar	Cerastium fontanum Baumg.	Caryophyllaceae	whole plant	4	Direct	Herb	0	0	0	0	0	0	0	0	2	0	0	0	0	0	0	0	2	0	0	0	0	0	0	0	0	0	0	0	0
Rahimabad	Gilgit	36.118837°	74.297376°	Bloghar	Cerastium fontanum Baumg.	Caryophyllaceae	whole plant	4	Direct	Herb	0	0	0	0	0	0	0	0	2	0	0	0	0	0	0	0	2	0	0	0	0	0	0	0	0	0	0	0	0
Basho	Skardu	35.469494°	75.359156°	Bloghar	Cerastium fontanum Baumg.	Caryophyllaceae	whole plant	2	Direct	Herb	0	0	0	0	0	0	0	0	1	0	0	0	0	0	0	0	1	0	0	0	0	0	0	0	0	0	0	0	0
Basho	Skardu	35.469494°	75.359156°	Bloghar	Cerastium fontanum Baumg.	Caryophyllaceae	whole plant	2	Direct	Herb	0	0	0	0	0	0	0	0	1	0	0	0	0	0	0	0	1	0	0	0	0	0	0	0	0	0	0	0	0
Hashupi	Skardu	35.485929°	75.696578°	Bloghar	Cerastium fontanum Baumg.	Caryophyllaceae	whole plant	2	Direct	Herb	0	0	0	0	0	0	0	0	1	0	0	0	0	0	0	0	1	0	0	0	0	0	0	0	0	0	0	0	0
Hashupi	Skardu	35.485929°	75.696578°	Bloghar	Cerastium fontanum Baumg.	Caryophyllaceae	whole plant	2	Direct	Herb	0	0	0	0	0	0	0	0	1	0	0	0	0	0	0	0	1	0	0	0	0	0	0	0	0	0	0	0	0
Hosho	Skardu	35.345214°	75.515283°	Bloghar	Cerastium fontanum Baumg.	Caryophyllaceae	whole plant	2	Direct	Herb	0	0	0	0	0	0	0	0	2	0	0	0	0	0	0	0	0	0	0	0	0	0	0	0	0	0	0	0	0
Thowar	Skardu	35.609167°	75.203611°	Bloghar	Cerastium fontanum Baumg.	Caryophyllaceae	whole plant	2	Direct	Herb	0	0	0	0	0	0	0	0	1	0	0	0	0	0	0	0	1	0	0	0	0	0	0	0	0	0	0	0	0
Thowar	Skardu	35.609167°	75.203611°	Bloghar	Cerastium fontanum Baumg.	Caryophyllaceae	whole plant	1	Direct	Herb	0	0	0	0	0	0	0	0	1	0	0	0	0	0	0	0	0	0	0	0	0	0	0	0	0	0	0	0	0
Gahkuch	Ghizer	36.162949°	73.755492°	Sheleet	Chenopodium album L.	Amaranthaceae	whole plant	2	Paste, infusion, poultice, decoction	Herb	0	0	0	0	0	0	0	1	0	0	0	0	0	0	0	1	0	0	0	0	0	0	0	0	0	0	0	0	0
Gahkuch	Ghizer	36.162949°	73.755492°	Sheleet	Chenopodium album L.	Amaranthaceae	whole plant	2	Paste, infusion, poultice, decoction	Herb	0	0	0	0	0	0	0	1	0	0	0	0	0	0	0	1	0	0	0	0	0	0	0	0	0	0	0	0	0
Gahkuch	Ghizer	36.162949°	73.755492°	Sheleet	Chenopodium album L.	Amaranthaceae	whole plant	2	Paste, infusion, poultice, decoction	Herb	0	0	0	0	0	0	0	1	0	0	0	0	0	0	0	1	0	0	0	0	0	0	0	0	0	0	0	0	0
Gahkuch	Ghizer	36.162949°	73.755492°	Sheleet	Chenopodium album L.	Amaranthaceae	whole plant	2	Paste, infusion, poultice, decoction	Herb	0	0	0	0	0	0	0	0	0	0	0	0	0	0	0	2	0	0	0	0	0	0	0	0	0	0	0	0	0
Gahkuch	Ghizer	36.162949°	73.755492°	Sheleet	Chenopodium album L.	Amaranthaceae	whole plant	2	Paste, infusion, poultice, decoction	Herb	0	0	0	0	0	0	0	0	0	0	0	0	0	0	0	2	0	0	0	0	0	0	0	0	0	0	0	0	0
Yaseen	Ghizer	36.369354°	73.332552°	Sheleet	Chenopodium album L.	Amaranthaceae	whole plant	2	Paste, infusion, poultice, decoction	Herb	0	0	0	0	0	0	0	1	0	0	0	0	0	0	0	1	0	0	0	0	0	0	0	0	0	0	0	0	0
Yaseen	Ghizer	36.369354°	73.332552°	Sheleet	Chenopodium album L.	Amaranthaceae	whole plant	2	Paste, infusion, poultice, decoction	Herb	0	0	0	0	0	0	0	0	0	0	0	0	0	0	0	2	0	0	0	0	0	0	0	0	0	0	0	0	0
Aliabad	Hunza	36.308563°	74.619496°	Kunoaw	Chenopodium album L.	Amaranthaceae	shoot	1	Infusion, poultice, decoction	Herb	0	0	0	0	0	0	0	1	0	0	0	0	0	0	0	0	0	0	0	0	0	0	0	0	0	0	0	0	0
Aliabad	Hunza	36.308563°	74.619496°	Kunoaw	Chenopodium album L.	Amaranthaceae	whole plant	2	Infusion, poultice, decoction	Herb	0	0	0	0	0	0	0	1	0	0	0	0	0	0	0	1	0	0	0	0	0	0	0	0	0	0	0	0	0
Aliabad	Hunza	36.308563°	74.619496°	Kunoaw	Chenopodium album L.	Amaranthaceae	shoot	1	Infusion, poultice, decoction	Herb	0	0	0	0	0	0	0	1	0	0	0	0	0	0	0	0	0	0	0	0	0	0	0	0	0	0	0	0	0
Aliabad	Hunza	36.308563°	74.619496°	Kunoaw	Chenopodium album L.	Amaranthaceae	whole plant	1	Infusion, poultice, decoction	Herb	0	0	0	0	0	0	0	0	0	0	0	0	0	0	0	1	0	0	0	0	0	0	0	0	0	0	0	0	0
Aliabad	Hunza	36.308563°	74.619496°	Kunoaw	Chenopodium album L.	Amaranthaceae	shoot	1	poultice, decoction	Herb	0	0	0	0	0	0	0	1	0	0	0	0	0	0	0	0	0	0	0	0	0	0	0	0	0	0	0	0	0
Aliabad	Hunza	36.308563°	74.619496°	Kunoaw	Chenopodium album L.	Amaranthaceae	whole plant	2	Paste, infusion, poultice, decoction	Herb	0	0	0	0	0	0	0	1	0	0	0	0	0	0	0	1	0	0	0	0	0	0	0	0	0	0	0	0	0
Altit	Hunza	36.316102°	74.681835°	Kunoaw	Chenopodium album L.	Amaranthaceae	whole plant	1	Infusion, poultice, decoction	Herb	0	0	0	0	0	0	0	0	0	0	0	0	0	0	0	1	0	0	0	0	0	0	0	0	0	0	0	0	0
Altit	Hunza	36.316102°	74.681835°	Kunoaw	Chenopodium album L.	Amaranthaceae	shoot	1	Infusion, poultice, decoction	Herb	0	0	0	0	0	0	0	1	0	0	0	0	0	0	0	0	0	0	0	0	0	0	0	0	0	0	0	0	0
Ghulkin	Hunza	36.407318°	74.863984°	Sheleet	Chenopodium album L.	Amaranthaceae	whole plant	1	Paste, decoction	Herb	0	0	0	0	0	0	0	1	0	0	0	0	0	0	0	0	0	0	0	0	0	0	0	0	0	0	0	0	0
Ghulkin	Hunza	36.407318°	74.863984°	Sheleet	Chenopodium album L.	Amaranthaceae	whole plant	1	Paste, decoction	Herb	0	0	0	0	0	0	0	1	0	0	0	0	0	0	0	0	0	0	0	0	0	0	0	0	0	0	0	0	0
Ghulkin	Hunza	36.407318°	74.863984°	Sheleet	Chenopodium album L.	Amaranthaceae	whole plant	1	Paste, decoction	Herb	0	0	0	0	0	0	0	1	0	0	0	0	0	0	0	0	0	0	0	0	0	0	0	0	0	0	0	0	0
Ghulkin	Hunza	36.407318°	74.863984°	Sheleet	Chenopodium album L.	Amaranthaceae	whole plant	1	Paste, decoction	Herb	0	0	0	0	0	0	0	1	0	0	0	0	0	0	0	0	0	0	0	0	0	0	0	0	0	0	0	0	0
Ghulkin	Hunza	36.407318°	74.863984°	Sheleet	Chenopodium album L.	Amaranthaceae	whole plant	1	Paste, decoction	Herb	0	0	0	0	0	0	0	1	0	0	0	0	0	0	0	0	0	0	0	0	0	0	0	0	0	0	0	0	0
Karimabad	Hunza	36.326408°	74.664316°	Kunoaw	Chenopodium album L.	Amaranthaceae	whole plant	2	Infusion, poultice, decoction	Herb	0	0	0	0	0	0	0	1	0	0	0	0	0	0	0	1	0	0	0	0	0	0	0	0	0	0	0	0	0
Murtazaabad	Hunza	36.285517°	74.607833°	Kunoaw	Chenopodium album L.	Amaranthaceae	shoot	1	Infusion, poultice, decoction	Herb	0	0	0	0	0	0	0	1	0	0	0	0	0	0	0	0	0	0	0	0	0	0	0	0	0	0	0	0	0
Murtazaabad	Hunza	36.285517°	74.607833°	Kunoaw	Chenopodium album L.	Amaranthaceae	shoot	1	Infusion, poultice, decoction	Herb	0	0	0	0	0	0	0	1	0	0	0	0	0	0	0	0	0	0	0	0	0	0	0	0	0	0	0	0	0
Murtazaabad	Hunza	36.285517°	74.607833°	Kunoaw	Chenopodium album L.	Amaranthaceae	whole plant	2	Infusion, poultice, decoction	Herb	0	0	0	0	0	0	0	1	0	0	0	0	0	0	0	1	0	0	0	0	0	0	0	0	0	0	0	0	0
Shimshal	Hunza	36.436464°	75.313109°	Sheleet	Chenopodium album L.	Amaranthaceae	whole plant	1	Paste, decoction	Herb	0	0	0	0	0	0	0	1	0	0	0	0	0	0	0	0	0	0	0	0	0	0	0	0	0	0	0	0	0
Shimshal	Hunza	36.436464°	75.313109°	Sheleet	Chenopodium album L.	Amaranthaceae	whole plant	1	Paste, decoction	Herb	0	0	0	0	0	0	0	1	0	0	0	0	0	0	0	0	0	0	0	0	0	0	0	0	0	0	0	0	0
Basho	Skardu	35.469494°	75.359156°	Snew	Chenopodium album L.	Amaranthaceae	leaves	2	Paste, infusion, poultice, decoction	Herb	0	1	0	0	0	0	0	0	0	1	0	0	0	0	0	0	0	0	0	0	0	0	0	0	0	0	0	0	0
Basho	Skardu	35.469494°	75.359156°	Snew	Chenopodium album L.	Amaranthaceae	leaves	3	Paste, infusion, poultice, decoction	Herb	0	2	1	0	0	0	0	0	0	0	0	0	0	0	0	0	0	0	0	0	0	0	0	0	0	0	0	0	0
Basho	Skardu	35.469494°	75.359156°	Snew	Chenopodium album L.	Amaranthaceae	leaves	3	Paste, infusion, poultice, decoction	Herb	0	1	1	0	0	0	0	0	0	1	0	0	0	0	0	0	0	0	0	0	0	0	0	0	0	0	0	0	0
Hashupi	Skardu	35.485929°	75.696578°	Snew	Chenopodium album L.	Amaranthaceae	leaves	4	Paste, infusion, poultice, decoction	Herb	0	2	1	0	0	0	0	0	0	1	0	0	0	0	0	0	0	0	0	0	0	0	0	0	0	0	0	0	0
Hashupi	Skardu	35.485929°	75.696578°	Snew	Chenopodium album L.	Amaranthaceae	leaves	3	Paste, infusion, poultice, decoction	Herb	0	1	1	0	0	0	0	0	0	1	0	0	0	0	0	0	0	0	0	0	0	0	0	0	0	0	0	0	0
Hashupi	Skardu	35.485929°	75.696578°	Snew	Chenopodium album L.	Amaranthaceae	leaves	2	Paste, infusion, poultice, decoction	Herb	0	1	1	0	0	0	0	0	0	0	0	0	0	0	0	0	0	0	0	0	0	0	0	0	0	0	0	0	0
Hashupi	Skardu	35.485929°	75.696578°	Snew	Chenopodium album L.	Amaranthaceae	leaves	3	Paste, infusion, poultice, decoction	Herb	0	2	0	0	0	0	0	0	0	1	0	0	0	0	0	0	0	0	0	0	0	0	0	0	0	0	0	0	0
Eidgah	Astore	35.347049°	74.857882°	Stranjungstwa	Cicer microphyllum Benth.	Leguminosae	whole plant	2	Direct, paste	Herb	0	0	0	2	0	0	0	0	0	0	0	0	0	0	0	0	0	0	0	0	0	0	0	0	0	0	0	0	0
Eidgah	Astore	35.347049°	74.857882°	Stranjungstwa	Cicer microphyllum Benth.	Leguminosae	whole plant	1	Direct, paste	Herb	0	0	0	1	0	0	0	0	0	0	0	0	0	0	0	0	0	0	0	0	0	0	0	0	0	0	0	0	0
Eidgah	Astore	35.347049°	74.857882°	Stranjungstwa	Cicer microphyllum Benth.	Leguminosae	whole plant	2	Direct, paste	Herb	0	0	0	2	0	0	0	0	0	0	0	0	0	0	0	0	0	0	0	0	0	0	0	0	0	0	0	0	0
Eidgah	Astore	35.347049°	74.857882°	Stranjungstwa	Cicer microphyllum Benth.	Leguminosae	whole plant	1	Direct, paste	Herb	0	0	0	1	0	0	0	0	0	0	0	0	0	0	0	0	0	0	0	0	0	0	0	0	0	0	0	0	0
Eidgah	Astore	35.347049°	74.857882°	Stranjungstwa	Cicer microphyllum Benth.	Leguminosae	whole plant	1	Direct, paste	Herb	0	0	0	1	0	0	0	0	0	0	0	0	0	0	0	0	0	0	0	0	0	0	0	0	0	0	0	0	0
Eidgah	Astore	35.347049°	74.857882°	Stranjungstwa	Cicer microphyllum Benth.	Leguminosae	whole plant	2	Direct, paste	Herb	0	0	0	2	0	0	0	0	0	0	0	0	0	0	0	0	0	0	0	0	0	0	0	0	0	0	0	0	0
Gorikot	Astore	35.281969°	74.841940°	Stranjungstwa	Cicer microphyllum Benth.	Leguminosae	whole plant	1	Direct, paste	Herb	0	0	0	1	0	0	0	0	0	0	0	0	0	0	0	0	0	0	0	0	0	0	0	0	0	0	0	0	0
Kargha	Gilgit	35.915251°	74.257648°	Stranjungstwa	Cicer microphyllum Benth.	Leguminosae	whole plant	2	Direct, paste	Herb	0	0	0	2	0	0	0	0	0	0	0	0	0	0	0	0	0	0	0	0	0	0	0	0	0	0	0	0	0
Kargha	Gilgit	35.915251°	74.257648°	Stranjungstwa	Cicer microphyllum Benth.	Leguminosae	whole plant	2	Direct, paste	Herb	0	0	0	2	0	0	0	0	0	0	0	0	0	0	0	0	0	0	0	0	0	0	0	0	0	0	0	0	0
Kargha	Gilgit	35.915251°	74.257648°	Stranjungstwa	Cicer microphyllum Benth.	Leguminosae	whole plant	2	Direct, paste	Herb	0	0	0	2	0	0	0	0	0	0	0	0	0	0	0	0	0	0	0	0	0	0	0	0	0	0	0	0	0
Kargha	Gilgit	35.915251°	74.257648°	Stranjungstwa	Cicer microphyllum Benth.	Leguminosae	whole plant	2	Direct, paste	Herb	0	0	0	2	0	0	0	0	0	0	0	0	0	0	0	0	0	0	0	0	0	0	0	0	0	0	0	0	0
Rahimabad	Gilgit	36.118837°	74.297376°	Stranjungstwa	Cicer microphyllum Benth.	Leguminosae	whole plant	2	Direct, paste	Herb	0	0	0	2	0	0	0	0	0	0	0	0	0	0	0	0	0	0	0	0	0	0	0	0	0	0	0	0	0
Rahimabad	Gilgit	36.118837°	74.297376°	Stranjungstwa	Cicer microphyllum Benth.	Leguminosae	whole plant	2	Direct, paste	Herb	0	0	0	2	0	0	0	0	0	0	0	0	0	0	0	0	0	0	0	0	0	0	0	0	0	0	0	0	0
Rahimabad	Gilgit	36.118837°	74.297376°	Stranjungstwa	Cicer microphyllum Benth.	Leguminosae	whole plant	2	Direct, paste	Herb	0	0	0	2	0	0	0	0	0	0	0	0	0	0	0	0	0	0	0	0	0	0	0	0	0	0	0	0	0
Basho	Skardu	35.469494°	75.359156°	Stranjungstwa	Cicer microphyllum Benth.	Leguminosae	whole plant	1	Direct, paste	Herb	0	0	0	1	0	0	0	0	0	0	0	0	0	0	0	0	0	0	0	0	0	0	0	0	0	0	0	0	0
Hashupi	Skardu	35.485929°	75.696578°	Stranjungstwa	Cicer microphyllum Benth.	Leguminosae	whole plant	1	Direct, paste	Herb	0	0	0	1	0	0	0	0	0	0	0	0	0	0	0	0	0	0	0	0	0	0	0	0	0	0	0	0	0
Hashupi	Skardu	35.485929°	75.696578°	Stranjungstwa	Cicer microphyllum Benth.	Leguminosae	whole plant	1	Direct, paste	Herb	0	0	0	1	0	0	0	0	0	0	0	0	0	0	0	0	0	0	0	0	0	0	0	0	0	0	0	0	0
Hashupi	Skardu	35.485929°	75.696578°	Stranjungstwa	Cicer microphyllum Benth.	Leguminosae	whole plant	2	Direct, paste	Herb	0	0	0	2	0	0	0	0	0	0	0	0	0	0	0	0	0	0	0	0	0	0	0	0	0	0	0	0	0
Hosho	Skardu	35.345214°	75.515283°	Stranjungstwa	Cicer microphyllum Benth.	Leguminosae	whole plant	2	Direct, paste	Herb	0	0	0	2	0	0	0	0	0	0	0	0	0	0	0	0	0	0	0	0	0	0	0	0	0	0	0	0	0
Thowar	Skardu	35.609167°	75.203611°	Stranjungstwa	Cicer microphyllum Benth.	Leguminosae	whole plant	2	Direct, paste	Herb	0	0	0	2	0	0	0	0	0	0	0	0	0	0	0	0	0	0	0	0	0	0	0	0	0	0	0	0	0
Thowar	Skardu	35.609167°	75.203611°	Stranjungstwa	Cicer microphyllum Benth.	Leguminosae	whole plant	2	Direct, paste	Herb	0	0	0	2	0	0	0	0	0	0	0	0	0	0	0	0	0	0	0	0	0	0	0	0	0	0	0	0	0
Kargha	Gilgit	35.915251°	74.257648°	Ishkinachi	Cichorium intybus L.	Compositae	whole plant	3	Direct, infusion, decoction	Herb	0	0	0	0	0	0	0	0	1	0	0	0	0	1	0	0	1	0	0	0	0	0	0	0	0	0	0	0	0
Kargha	Gilgit	35.915251°	74.257648°	Ishkinachi	Cichorium intybus L.	Compositae	whole plant	2	Direct, infusion, decoction	Herb	0	0	0	0	0	0	0	0	1	0	0	0	0	0	0	0	1	0	0	0	0	0	0	0	0	0	0	0	0
Kargha	Gilgit	35.915251°	74.257648°	Ishkinachi	Cichorium intybus L.	Compositae	whole plant	3	Direct, infusion, decoction	Herb	0	0	0	0	0	0	0	0	1	0	0	0	0	1	0	0	1	0	0	0	0	0	0	0	0	0	0	0	0
Kargha	Gilgit	35.915251°	74.257648°	Ishkinachi	Cichorium intybus L.	Compositae	whole plant	2	Direct, infusion, decoction	Herb	0	0	0	0	0	0	0	0	1	0	0	0	0	1	0	0	0	0	0	0	0	0	0	0	0	0	0	0	0
Kargha	Gilgit	35.915251°	74.257648°	Ishkinachi	Cichorium intybus L.	Compositae	whole plant	2	Direct, infusion, decoction	Herb	0	0	0	0	0	0	0	0	1	0	0	0	0	0	0	0	1	0	0	0	0	0	0	0	0	0	0	0	0
Rahimabad	Gilgit	36.118837°	74.297376°	Ishkinachi	Cichorium intybus L.	Compositae	whole plant	2	Direct, infusion, decoction	Herb	0	0	0	0	0	0	0	0	1	0	0	0	0	0	0	0	1	0	0	0	0	0	0	0	0	0	0	0	0
Rahimabad	Gilgit	36.118837°	74.297376°	Ishkinachi	Cichorium intybus L.	Compositae	whole plant	2	Direct, infusion, decoction	Herb	0	0	0	0	0	0	0	0	1	0	0	0	0	1	0	0	0	0	0	0	0	0	0	0	0	0	0	0	0
Aliabad	Hunza	36.308563°	74.619496°	Qarali Chicknachi	Cichorium intybus L.	Compositae	whole plant	1	Direct, decoction	Herb	0	0	0	0	0	0	0	0	0	0	0	0	0	1	0	0	0	0	0	0	0	0	0	0	0	0	0	0	0
Altit	Hunza	36.316102°	74.681835°	Qarali Chicknachi	Cichorium intybus L.	Compositae	whole plant	1	Direct, decoction	Herb	0	0	0	0	0	0	0	0	0	0	0	0	0	1	0	0	0	0	0	0	0	0	0	0	0	0	0	0	0
Altit	Hunza	36.316102°	74.681835°	Qarali Chicknachi	Cichorium intybus L.	Compositae	whole plant	1	Direct, decoction	Herb	0	0	0	0	0	0	0	0	0	0	0	0	0	1	0	0	0	0	0	0	0	0	0	0	0	0	0	0	0
Ghulkin	Hunza	36.407318°	74.863984°	Caroop	Cichorium intybus L.	Compositae	root, flower	3	Direct, decoction	Herb	0	0	0	0	0	0	0	1	0	0	0	0	0	0	0	0	2	0	0	0	0	0	0	0	0	0	0	0	0
Ghulkin	Hunza	36.407318°	74.863984°	Caroop	Cichorium intybus L.	Compositae	root, flower	3	Direct, decoction	Herb	0	0	0	0	0	0	0	1	0	0	0	0	0	0	0	0	2	0	0	0	0	0	0	0	0	0	0	0	0
Ghulkin	Hunza	36.407318°	74.863984°	Caroop	Cichorium intybus L.	Compositae	root, flower	3	Direct, decoction	Herb	0	0	0	0	0	0	0	1	0	0	0	0	0	0	0	0	2	0	0	0	0	0	0	0	0	0	0	0	0
Ghulkin	Hunza	36.407318°	74.863984°	Caroop	Cichorium intybus L.	Compositae	root, flower	1	Direct, decoction	Herb	0	0	0	0	0	0	0	1	0	0	0	0	0	0	0	0	0	0	0	0	0	0	0	0	0	0	0	0	0
Ghulkin	Hunza	36.407318°	74.863984°	Caroop	Cichorium intybus L.	Compositae	root, flower	1	Direct, decoction	Herb	0	0	0	0	0	0	0	1	0	0	0	0	0	0	0	0	0	0	0	0	0	0	0	0	0	0	0	0	0
Karimabad	Hunza	36.326408°	74.664316°	Qarali Chicknachi	Cichorium intybus L.	Compositae	whole plant	1	Direct, decoction	Herb	0	0	0	0	0	0	0	0	0	0	0	0	0	1	0	0	0	0	0	0	0	0	0	0	0	0	0	0	0
Karimabad	Hunza	36.326408°	74.664316°	Qarali Chicknachi	Cichorium intybus L.	Compositae	whole plant	1	Direct, decoction	Herb	0	0	0	0	0	0	0	0	0	0	0	0	0	1	0	0	0	0	0	0	0	0	0	0	0	0	0	0	0
Karimabad	Hunza	36.326408°	74.664316°	Qarali Chicknachi	Cichorium intybus L.	Compositae	whole plant	1	Direct, decoction	Herb	0	0	0	0	0	0	0	0	0	0	0	0	0	1	0	0	0	0	0	0	0	0	0	0	0	0	0	0	0
Murtazaabad	Hunza	36.285517°	74.607833°	Qarali Chicknachi	Cichorium intybus L.	Compositae	whole plant	1	Direct, decoction	Herb	0	0	0	0	0	0	0	0	0	0	0	0	0	1	0	0	0	0	0	0	0	0	0	0	0	0	0	0	0
Shimshal	Hunza	36.436464°	75.313109°	Caroop	Cichorium intybus L.	Compositae	root, flower	3	Direct, decoction	Herb	0	0	0	0	0	0	0	1	0	0	0	0	0	0	0	0	2	0	0	0	0	0	0	0	0	0	0	0	0
Shimshal	Hunza	36.436464°	75.313109°	Caroop	Cichorium intybus L.	Compositae	root, flower	3	Direct, decoction	Herb	0	0	0	0	0	0	0	1	0	0	0	0	0	0	0	0	2	0	0	0	0	0	0	0	0	0	0	0	0
Ghulmit	Nagar	36.241766°	74.462110°	Ishkinachi	Cichorium intybus L.	Compositae	whole plant	1	Direct	Herb	0	0	0	0	0	0	0	0	0	0	0	0	0	0	0	0	0	0	0	0	0	1	0	0	0	0	0	0	0
Ghulmit	Nagar	36.241766°	74.462110°	Ishkinachi	Cichorium intybus L.	Compositae	whole plant	3	Direct, infusion, decoction	Herb	0	0	0	0	0	0	1	1	0	0	0	0	0	0	0	0	0	0	0	0	0	1	0	0	0	0	0	0	0
Ghulmit	Nagar	36.241766°	74.462110°	Ishkinachi	Cichorium intybus L.	Compositae	Root, leaves	3	Direct, infusion, decoction	Herb	0	0	0	0	0	0	1	1	0	0	0	0	0	0	0	0	0	0	0	0	0	1	0	0	0	0	0	0	0
Ghulmit	Nagar	36.241766°	74.462110°	Ishkinachi	Cichorium intybus L.	Compositae	whole plant	1	Direct, infusion, decoction	Herb	0	0	0	0	0	0	0	0	0	0	0	0	0	0	0	0	0	0	0	0	0	1	0	0	0	0	0	0	0
Ghulmit	Nagar	36.241766°	74.462110°	Ishkinachi	Cichorium intybus L.	Compositae	root, flower	3	Direct, infusion, decoction	Herb	0	0	0	0	0	0	1	1	0	0	0	0	0	0	0	0	0	0	0	0	0	1	0	0	0	0	0	0	0
Ghulmit	Nagar	36.241766°	74.462110°	Ishkinachi	Cichorium intybus L.	Compositae	whole plant	2	Direct, infusion, decoction	Herb	0	0	0	0	0	0	1	1	0	0	0	0	0	0	0	0	0	0	0	0	0	0	0	0	0	0	0	0	0
Minapin	Nagar	36.250922°	74.536075°	Ishkinachi	Cichorium intybus L.	Compositae	root, flower	2	Direct, infusion, decoction	Herb	0	0	0	0	0	0	1	1	0	0	0	0	0	0	0	0	0	0	0	0	0	0	0	0	0	0	0	0	0
Minapin	Nagar	36.250922°	74.536075°	Ishkinachi	Cichorium intybus L.	Compositae	root, flower	1	Direct, infusion, decoction	Herb	0	0	0	0	0	0	0	1	0	0	0	0	0	0	0	0	0	0	0	0	0	0	0	0	0	0	0	0	0
Minapin	Nagar	36.250922°	74.536075°	Ishkinachi	Cichorium intybus L.	Compositae	whole plant	2	Direct, infusion, decoction	Herb	0	0	0	0	0	0	1	0	0	0	0	0	0	0	0	0	0	0	0	0	0	1	0	0	0	0	0	0	0
Minapin	Nagar	36.250922°	74.536075°	Ishkinachi	Cichorium intybus L.	Compositae	Root, leaves	3	Direct, infusion, decoction	Herb	0	0	0	0	0	0	1	2	0	0	0	0	0	0	0	0	0	0	0	0	0	0	0	0	0	0	0	0	0
Minapin	Nagar	36.250922°	74.536075°	Ishkinachi	Cichorium intybus L.	Compositae	whole plant	2	Direct, infusion, decoction	Herb	0	0	0	0	0	0	1	0	0	0	0	0	0	0	0	0	0	0	0	0	0	1	0	0	0	0	0	0	0
Minapin	Nagar	36.250922°	74.536075°	Ishkinachi	Cichorium intybus L.	Compositae	root, flower	2	Direct, infusion, decoction	Herb	0	0	0	0	0	0	0	1	0	0	0	0	0	0	0	0	0	0	0	0	0	1	0	0	0	0	0	0	0
Nagar Khas	Nagar	36.276377°	74.719955°	Ishkinachi	Cichorium intybus L.	Compositae	Root, leaves	4	Direct, infusion, decoction	Herb	0	0	0	0	0	0	1	2	0	0	0	0	0	0	0	0	0	0	0	0	0	1	0	0	0	0	0	0	0
Nagar Khas	Nagar	36.276377°	74.719955°	Ishkinachi	Cichorium intybus L.	Compositae	Root, leaves	2	Direct, infusion, decoction	Herb	0	0	0	0	0	0	0	1	0	0	0	0	0	0	0	0	0	0	0	0	0	1	0	0	0	0	0	0	0
Nagar Khas	Nagar	36.276377°	74.719955°	Ishkinachi	Cichorium intybus L.	Compositae	whole plant	2	Direct, infusion, decoction	Herb	0	0	0	0	0	0	1	1	0	0	0	0	0	0	0	0	0	0	0	0	0	0	0	0	0	0	0	0	0
Nagar Khas	Nagar	36.276377°	74.719955°	Ishkinachi	Cichorium intybus L.	Compositae	root, flower	3	Direct, infusion, decoction	Herb	0	0	0	0	0	0	0	2	0	0	0	0	0	0	0	0	0	0	0	0	0	1	0	0	0	0	0	0	0
Nagar Khas	Nagar	36.276377°	74.719955°	Ishkinachi	Cichorium intybus L.	Compositae	whole plant	2	Direct, infusion, decoction	Herb	0	0	0	0	0	0	1	1	0	0	0	0	0	0	0	0	0	0	0	0	0	0	0	0	0	0	0	0	0
Nagar Khas	Nagar	36.276377°	74.719955°	Ishkinachi	Cichorium intybus L.	Compositae	Root, leaves	1	Direct, infusion, decoction	Herb	0	0	0	0	0	0	0	1	0	0	0	0	0	0	0	0	0	0	0	0	0	0	0	0	0	0	0	0	0
Phekar	Nagar	36.263297°	74.594568°	Ishkinachi	Cichorium intybus L.	Compositae	whole plant	2	Direct, infusion, decoction	Herb	0	0	0	0	0	0	1	0	0	0	0	0	0	0	0	0	0	0	0	0	0	1	0	0	0	0	0	0	0
Phekar	Nagar	36.263297°	74.594568°	Ishkinachi	Cichorium intybus L.	Compositae	whole plant	2	Direct	Herb	0	0	0	0	0	0	0	1	0	0	0	0	0	0	0	0	0	0	0	0	0	1	0	0	0	0	0	0	0
Phekar	Nagar	36.263297°	74.594568°	Ishkinachi	Cichorium intybus L.	Compositae	Root, leaves	3	Direct, infusion, decoction	Herb	0	0	0	0	0	0	1	1	0	0	0	0	0	0	0	0	0	0	0	0	0	1	0	0	0	0	0	0	0
Basho	Skardu	35.469494°	75.359156°	Shantha	Cichorium intybus L.	Compositae	Root, leaves	1	Direct, infusion, decoction	Herb	0	0	0	1	0	0	0	0	0	0	0	0	0	0	0	0	0	0	0	0	0	0	0	0	0	0	0	0	0
Basho	Skardu	35.469494°	75.359156°	Shantha	Cichorium intybus L.	Compositae	Root, leaves	1	Direct, infusion, decoction	Herb	0	0	0	1	0	0	0	0	0	0	0	0	0	0	0	0	0	0	0	0	0	0	0	0	0	0	0	0	0
Basho	Skardu	35.469494°	75.359156°	Shantha	Cichorium intybus L.	Compositae	Root, leaves	2	Direct, infusion, decoction	Herb	0	0	0	0	0	0	0	1	0	0	0	0	0	0	0	0	1	0	0	0	0	0	0	0	0	0	0	0	0
Hashupi	Skardu	35.485929°	75.696578°	Shantha	Cichorium intybus L.	Compositae	Root, leaves	3	Direct, infusion, decoction	Herb	0	0	0	1	0	0	0	1	0	0	0	0	0	0	0	0	1	0	0	0	0	0	0	0	0	0	0	0	0
Hashupi	Skardu	35.485929°	75.696578°	Shantha	Cichorium intybus L.	Compositae	Root, leaves	2	Direct, infusion, decoction	Herb	0	0	0	0	0	0	0	1	0	0	0	0	0	0	0	0	1	0	0	0	0	0	0	0	0	0	0	0	0
Hashupi	Skardu	35.485929°	75.696578°	Shantha	Cichorium intybus L.	Compositae	Root, leaves	1	Direct, infusion, decoction	Herb	0	0	0	1	0	0	0	0	0	0	0	0	0	0	0	0	0	0	0	0	0	0	0	0	0	0	0	0	0
Thowar	Skardu	35.609167°	75.203611°	Shantha	Cichorium intybus L.	Compositae	Root, leaves	3	Direct, infusion, decoction	Herb	0	0	0	1	0	0	0	1	0	0	0	0	0	0	0	0	1	0	0	0	0	0	0	0	0	0	0	0	0
Altit	Hunza	36.316102°	74.681835°	Bowar	Citrullus vulgaris Schrad.	Cucurbitaceae	fruit	2	Decoction	Herb	0	0	0	0	0	0	0	2	0	0	0	0	0	0	0	0	0	0	0	0	0	0	0	0	0	0	0	0	0
Altit	Hunza	36.316102°	74.681835°	Bowar	Citrullus vulgaris Schrad.	Cucurbitaceae	fruit	1	Decoction	Herb	0	0	0	0	0	0	0	1	0	0	0	0	0	0	0	0	0	0	0	0	0	0	0	0	0	0	0	0	0
Altit	Hunza	36.316102°	74.681835°	Bowar	Citrullus vulgaris Schrad.	Cucurbitaceae	fruit	2	Decoction	Herb	0	0	0	0	0	0	0	2	0	0	0	0	0	0	0	0	0	0	0	0	0	0	0	0	0	0	0	0	0
Altit	Hunza	36.316102°	74.681835°	Bowar	Citrullus vulgaris Schrad.	Cucurbitaceae	fruit	1	Decoction	Herb	0	0	0	0	0	0	0	1	0	0	0	0	0	0	0	0	0	0	0	0	0	0	0	0	0	0	0	0	0
Karimabad	Hunza	36.326408°	74.664316°	Bowar	Citrullus vulgaris Schrad.	Cucurbitaceae	fruit	1	Decoction	Herb	0	0	0	0	0	0	0	1	0	0	0	0	0	0	0	0	0	0	0	0	0	0	0	0	0	0	0	0	0
Murtazaabad	Hunza	36.285517°	74.607833°	Bowar	Citrullus vulgaris Schrad.	Cucurbitaceae	fruit	2	Decoction	Herb	0	0	0	0	0	0	0	2	0	0	0	0	0	0	0	0	0	0	0	0	0	0	0	0	0	0	0	0	0
Murtazaabad	Hunza	36.285517°	74.607833°	Bowar	Citrullus vulgaris Schrad.	Cucurbitaceae	fruit	2	Decoction	Herb	0	0	0	0	0	0	0	2	0	0	0	0	0	0	0	0	0	0	0	0	0	0	0	0	0	0	0	0	0
Murtazaabad	Hunza	36.285517°	74.607833°	Bowar	Citrullus vulgaris Schrad.	Cucurbitaceae	fruit	1	Decoction	Herb	0	0	0	0	0	0	0	1	0	0	0	0	0	0	0	0	0	0	0	0	0	0	0	0	0	0	0	0	0
Murtazaabad	Hunza	36.285517°	74.607833°	Bowar	Citrullus vulgaris Schrad.	Cucurbitaceae	fruit	2	Decoction	Herb	0	0	0	0	0	0	0	2	0	0	0	0	0	0	0	0	0	0	0	0	0	0	0	0	0	0	0	0	0
Bilchar/Bagrote	Gilgit	35.942517°	74.545274°	Murghushi	Clematis baltistanica Qureshi & Chaudhri	Ranunculaceae	whole plant	3	Paste	Herb	0	0	1	0	0	1	0	0	0	0	1	0	0	0	0	0	0	0	0	0	0	0	0	0	0	0	0	0	0
Bilchar/Bagrote	Gilgit	35.942517°	74.545274°	Murghushi	Clematis baltistanica Qureshi & Chaudhri	Ranunculaceae	whole plant	1	Paste	Herb	0	0	1	0	0	0	0	0	0	0	0	0	0	0	0	0	0	0	0	0	0	0	0	0	0	0	0	0	0
Bilchar/Bagrote	Gilgit	35.942517°	74.545274°	Murghushi	Clematis baltistanica Qureshi & Chaudhri	Ranunculaceae	whole plant	3	Paste	Herb	0	0	1	0	0	1	0	0	0	0	1	0	0	0	0	0	0	0	0	0	0	0	0	0	0	0	0	0	0
Bilchar/Bagrote	Gilgit	35.942517°	74.545274°	Murghushi	Clematis baltistanica Qureshi & Chaudhri	Ranunculaceae	whole plant	3	Paste	Herb	0	0	1	0	0	1	0	0	0	0	1	0	0	0	0	0	0	0	0	0	0	0	0	0	0	0	0	0	0
Bilchar/Bagrote	Gilgit	35.942517°	74.545274°	Murghushi	Clematis baltistanica Qureshi & Chaudhri	Ranunculaceae	whole plant	3	Paste	Herb	0	0	1	0	0	1	0	0	0	0	1	0	0	0	0	0	0	0	0	0	0	0	0	0	0	0	0	0	0
Danyore	Gilgit	35.919880°	74.386181°	Murghushi	Clematis baltistanica Qureshi & Chaudhri	Ranunculaceae	whole plant	1	Paste	Herb	0	0	1	0	0	0	0	0	0	0	0	0	0	0	0	0	0	0	0	0	0	0	0	0	0	0	0	0	0
Danyore	Gilgit	35.919880°	74.386181°	Murghushi	Clematis baltistanica Qureshi & Chaudhri	Ranunculaceae	whole plant	1	Paste	Herb	0	0	1	0	0	0	0	0	0	0	0	0	0	0	0	0	0	0	0	0	0	0	0	0	0	0	0	0	0
Danyore	Gilgit	35.919880°	74.386181°	Murghushi	Clematis baltistanica Qureshi & Chaudhri	Ranunculaceae	whole plant	3	Paste	Herb	0	0	1	0	0	1	0	0	0	0	1	0	0	0	0	0	0	0	0	0	0	0	0	0	0	0	0	0	0
Jalalabad	Gilgit	35.880457°	74.493590°	Murghushi	Clematis baltistanica Qureshi & Chaudhri	Ranunculaceae	whole plant	3	Paste	Herb	0	0	1	0	0	1	0	0	0	0	1	0	0	0	0	0	0	0	0	0	0	0	0	0	0	0	0	0	0
Jalalabad	Gilgit	35.880457°	74.493590°	Murghushi	Clematis baltistanica Qureshi & Chaudhri	Ranunculaceae	whole plant	3	Paste	Herb	0	0	1	0	0	1	0	0	0	0	1	0	0	0	0	0	0	0	0	0	0	0	0	0	0	0	0	0	0
Jalalabad	Gilgit	35.880457°	74.493590°	Murghushi	Clematis baltistanica Qureshi & Chaudhri	Ranunculaceae	whole plant	3	Paste	Herb	0	0	1	0	0	1	0	0	0	0	1	0	0	0	0	0	0	0	0	0	0	0	0	0	0	0	0	0	0
Jalalabad	Gilgit	35.880457°	74.493590°	Murghushi	Clematis baltistanica Qureshi & Chaudhri	Ranunculaceae	whole plant	3	Paste	Herb	0	0	1	0	0	1	0	0	0	0	1	0	0	0	0	0	0	0	0	0	0	0	0	0	0	0	0	0	0
Jalalabad	Gilgit	35.880457°	74.493590°	Murghushi	Clematis baltistanica Qureshi & Chaudhri	Ranunculaceae	whole plant	3	Paste	Herb	0	0	1	0	0	1	0	0	0	0	1	0	0	0	0	0	0	0	0	0	0	0	0	0	0	0	0	0	0
Kargha	Gilgit	35.915251°	74.257648°	Margush	Clematis baltistanica Qureshi & Chaudhri	Ranunculaceae	leaves, flower	4	Paste	Herb	0	4	0	0	0	0	0	0	0	0	0	0	0	0	0	0	0	0	0	0	0	0	0	0	0	0	0	0	0
Kargha	Gilgit	35.915251°	74.257648°	Margush	Clematis baltistanica Qureshi & Chaudhri	Ranunculaceae	leaves, flower	4	Paste	Herb	0	4	0	0	0	0	0	0	0	0	0	0	0	0	0	0	0	0	0	0	0	0	0	0	0	0	0	0	0
Kargha	Gilgit	35.915251°	74.257648°	Margush	Clematis baltistanica Qureshi & Chaudhri	Ranunculaceae	leaves, flower	4	Paste	Herb	0	4	0	0	0	0	0	0	0	0	0	0	0	0	0	0	0	0	0	0	0	0	0	0	0	0	0	0	0
Kargha	Gilgit	35.915251°	74.257648°	Margush	Clematis baltistanica Qureshi & Chaudhri	Ranunculaceae	leaves, flower	4	Paste	Herb	0	4	0	0	0	0	0	0	0	0	0	0	0	0	0	0	0	0	0	0	0	0	0	0	0	0	0	0	0
Kargha	Gilgit	35.915251°	74.257648°	Margush	Clematis baltistanica Qureshi & Chaudhri	Ranunculaceae	leaves, flower	4	Paste	Herb	0	4	0	0	0	0	0	0	0	0	0	0	0	0	0	0	0	0	0	0	0	0	0	0	0	0	0	0	0
Kargha	Gilgit	35.915251°	74.257648°	Margush	Clematis baltistanica Qureshi & Chaudhri	Ranunculaceae	leaves, flower	4	Paste	Herb	0	4	0	0	0	0	0	0	0	0	0	0	0	0	0	0	0	0	0	0	0	0	0	0	0	0	0	0	0
Rahimabad	Gilgit	36.118837°	74.297376°	Margush	Clematis baltistanica Qureshi & Chaudhri	Ranunculaceae	leaves, flower	4	Paste	Herb	0	4	0	0	0	0	0	0	0	0	0	0	0	0	0	0	0	0	0	0	0	0	0	0	0	0	0	0	0
Ghulkin	Hunza	36.407318°	74.863984°	Chindrik	Clematis baltistanica Qureshi & Chaudhri	Rananculaceae	leaves, flower, fruit	1	Paste	Herb	0	0	0	0	0	0	0	1	0	0	0	0	0	0	0	0	0	0	0	0	0	0	0	0	0	0	0	0	0
Ghulkin	Hunza	36.407318°	74.863984°	Chindrik	Clematis baltistanica Qureshi & Chaudhri	Rananculaceae	leaves, flower, fruit	3	Paste	Herb	0	1	0	0	0	0	0	2	0	0	0	0	0	0	0	0	0	0	0	0	0	0	0	0	0	0	0	0	0
Ghulkin	Hunza	36.407318°	74.863984°	Chindrik	Clematis baltistanica Qureshi & Chaudhri	Rananculaceae	leaves, flower, fruit	3	Paste	Herb	0	1	0	0	0	0	0	2	0	0	0	0	0	0	0	0	0	0	0	0	0	0	0	0	0	0	0	0	0
Shimshal	Hunza	36.436464°	75.313109°	Chindrik	Clematis baltistanica Qureshi & Chaudhri	Rananculaceae	leaves, flower, fruit	3	Paste	Herb	0	1	0	0	0	0	0	2	0	0	0	0	0	0	0	0	0	0	0	0	0	0	0	0	0	0	0	0	0
Shimshal	Hunza	36.436464°	75.313109°	Chindrik	Clematis baltistanica Qureshi & Chaudhri	Rananculaceae	leaves, flower, fruit	3	Paste	Herb	0	1	0	0	0	0	0	2	0	0	0	0	0	0	0	0	0	0	0	0	0	0	0	0	0	0	0	0	0
Shimshal	Hunza	36.436464°	75.313109°	Chindrik	Clematis baltistanica Qureshi & Chaudhri	Rananculaceae	leaves, flower, fruit	2	Paste	Herb	0	0	0	0	0	0	0	2	0	0	0	0	0	0	0	0	0	0	0	0	0	0	0	0	0	0	0	0	0
Eidgah	Astore	35.347049°	74.857882°	Loo sunma/Bajo mindoq	Codonopsis clematidea (Schrenk) C.B.Clarke	Campanulaceae	flower	1	Decoction	Herb	0	0	0	0	0	0	0	0	0	0	0	0	0	0	1	0	0	0	0	0	0	0	0	0	0	0	0	0	0
Eidgah	Astore	35.347049°	74.857882°	Loo sunma/Bajo mindoq	Codonopsis clematidea (Schrenk) C.B.Clarke	Campanulaceae	flower	1	Decoction	Herb	0	0	0	0	0	0	0	0	0	0	0	0	0	0	1	0	0	0	0	0	0	0	0	0	0	0	0	0	0
Eidgah	Astore	35.347049°	74.857882°	Loo sunma/Bajo mindoq	Codonopsis clematidea (Schrenk) C.B.Clarke	Campanulaceae	flower	1	Decoction	Herb	0	0	0	0	0	0	0	0	0	0	0	0	0	0	1	0	0	0	0	0	0	0	0	0	0	0	0	0	0
Eidgah	Astore	35.347049°	74.857882°	Loo sunma/Bajo mindoq	Codonopsis clematidea (Schrenk) C.B.Clarke	Campanulaceae	flower	1	Decoction	Herb	0	0	0	0	0	0	0	0	0	0	0	0	0	0	1	0	0	0	0	0	0	0	0	0	0	0	0	0	0
Eidgah	Astore	35.347049°	74.857882°	Loo sunma/Bajo mindoq	Codonopsis clematidea (Schrenk) C.B.Clarke	Campanulaceae	flower	1	Decoction	Herb	0	0	0	0	0	0	0	0	0	0	0	0	0	0	1	0	0	0	0	0	0	0	0	0	0	0	0	0	0
Eidgah	Astore	35.347049°	74.857882°	Loo sunma/Bajo mindoq	Codonopsis clematidea (Schrenk) C.B.Clarke	Campanulaceae	flower	1	Decoction	Herb	0	0	0	0	0	0	0	0	0	0	0	0	0	0	1	0	0	0	0	0	0	0	0	0	0	0	0	0	0
Gorikot	Astore	35.281969°	74.841940°	Loo sunma/Bajo mindoq	Codonopsis clematidea (Schrenk) C.B.Clarke	Campanulaceae	flower	1	Decoction	Herb	0	0	0	0	0	0	0	0	0	0	0	0	0	0	1	0	0	0	0	0	0	0	0	0	0	0	0	0	0
Gorikot	Astore	35.281969°	74.841940°	Loo sunma/Bajo mindoq	Codonopsis clematidea (Schrenk) C.B.Clarke	Campanulaceae	flower	1	Decoction	Herb	0	0	0	0	0	0	0	0	0	0	0	0	0	0	1	0	0	0	0	0	0	0	0	0	0	0	0	0	0
Gorikot	Astore	35.281969°	74.841940°	Loo sunma/Bajo mindoq	Codonopsis clematidea (Schrenk) C.B.Clarke	Campanulaceae	flower	1	Decoction	Herb	0	0	0	0	0	0	0	0	0	0	0	0	0	0	1	0	0	0	0	0	0	0	0	0	0	0	0	0	0
Gorikot	Astore	35.281969°	74.841940°	Loo sunma/Bajo mindoq	Codonopsis clematidea (Schrenk) C.B.Clarke	Campanulaceae	flower	1	Decoction	Herb	0	0	0	0	0	0	0	0	0	0	0	0	0	0	1	0	0	0	0	0	0	0	0	0	0	0	0	0	0
Jaglot	Astore	35.685000°	74.623889°	Loo sunma/Bajo mindoq	Codonopsis clematidea (Schrenk) C.B.Clarke	Campanulaceae	flower	1	Decoction	Herb	0	0	0	0	0	0	0	0	0	0	0	0	0	0	1	0	0	0	0	0	0	0	0	0	0	0	0	0	0
Rattu	Astore	35.168461°	74.791752°1	Loo sunma/Bajo mindoq	Codonopsis clematidea (Schrenk) C.B.Clarke	Campanulaceae	flower	1	Decoction	Herb	0	0	0	0	0	0	0	0	0	0	0	0	0	0	1	0	0	0	0	0	0	0	0	0	0	0	0	0	0
Rattu	Astore	35.168461°	74.791752°1	Loo sunma/Bajo mindoq	Codonopsis clematidea (Schrenk) C.B.Clarke	Campanulaceae	flower	1	Decoction	Herb	0	0	0	0	0	0	0	0	0	0	0	0	0	0	1	0	0	0	0	0	0	0	0	0	0	0	0	0	0
Rattu	Astore	35.168461°	74.791752°1	Loo sunma/Bajo mindoq	Codonopsis clematidea (Schrenk) C.B.Clarke	Campanulaceae	flower	1	Decoction	Herb	0	0	0	0	0	0	0	0	0	0	0	0	0	0	1	0	0	0	0	0	0	0	0	0	0	0	0	0	0
Basho	Skardu	35.469494°	75.359156°	Bajo mindoq	Codonopsis clematidea (Schrenk) C.B.Clarke	Campanulaceae	flower	1	Decoction	Herb	0	0	0	0	0	0	0	0	0	0	0	0	0	0	1	0	0	0	0	0	0	0	0	0	0	0	0	0	0
Hashupi	Skardu	35.485929°	75.696578°	Bajo mindoq	Codonopsis clematidea (Schrenk) C.B.Clarke	Campanulaceae	flower	1	Decoction	Herb	0	0	0	0	0	0	0	0	0	0	0	0	0	0	1	0	0	0	0	0	0	0	0	0	0	0	0	0	0
Hashupi	Skardu	35.485929°	75.696578°	Bajo mindoq	Codonopsis clematidea (Schrenk) C.B.Clarke	Campanulaceae	flower	1	Decoction	Herb	0	0	0	0	0	0	0	0	0	0	0	0	0	0	1	0	0	0	0	0	0	0	0	0	0	0	0	0	0
Hashupi	Skardu	35.485929°	75.696578°	Bajo mindoq	Codonopsis clematidea (Schrenk) C.B.Clarke	Campanulaceae	flower	1	Decoction	Herb	0	0	0	0	0	0	0	0	0	0	0	0	0	0	1	0	0	0	0	0	0	0	0	0	0	0	0	0	0
Hashupi	Skardu	35.485929°	75.696578°	Bajo mindoq	Codonopsis clematidea (Schrenk) C.B.Clarke	Campanulaceae	flower	1	Decoction	Herb	0	0	0	0	0	0	0	0	0	0	0	0	0	0	1	0	0	0	0	0	0	0	0	0	0	0	0	0	0
Hosho	Skardu	35.345214°	75.515283°	Bajo mindoq	Codonopsis clematidea (Schrenk) C.B.Clarke	Campanulaceae	flower	1	Decoction	Herb	0	0	0	0	0	0	0	0	0	0	0	0	0	0	1	0	0	0	0	0	0	0	0	0	0	0	0	0	0
Thowar	Skardu	35.609167°	75.203611°	Bajo mindoq	Codonopsis clematidea (Schrenk) C.B.Clarke	Campanulaceae	flower	1	Decoction	Herb	0	0	0	0	0	0	0	0	0	0	0	0	0	0	1	0	0	0	0	0	0	0	0	0	0	0	0	0	0
Ghulkin	Hunza	36.407318°	74.863984°	Noghurdoom woosh	Comarum salesovianum (Stephan) Asch. & Graebn.	Rosaceae	flower	1	Decoction	Shrub	0	0	0	0	0	0	0	0	0	0	0	0	0	0	0	0	0	0	0	0	1	0	0	0	0	0	0	0	0
Ghulkin	Hunza	36.407318°	74.863984°	Noghurdoom woosh	Comarum salesovianum (Stephan) Asch. & Graebn.	Rosaceae	flower	1	Decoction	Shrub	0	0	0	0	0	0	0	0	0	0	0	0	0	0	0	0	0	0	0	0	1	0	0	0	0	0	0	0	0
Ghulkin	Hunza	36.407318°	74.863984°	Noghurdoom woosh	Comarum salesovianum (Stephan) Asch. & Graebn.	Rosaceae	flower	1	Decoction	Shrub	0	0	0	0	0	0	0	0	0	0	0	0	0	0	0	0	0	0	0	0	1	0	0	0	0	0	0	0	0
Ghulkin	Hunza	36.407318°	74.863984°	Noghurdoom woosh	Comarum salesovianum (Stephan) Asch. & Graebn.	Rosaceae	flower	1	Decoction	Shrub	0	0	0	0	0	0	0	0	0	0	0	0	0	0	0	0	0	0	0	0	1	0	0	0	0	0	0	0	0
Shimshal	Hunza	36.436464°	75.313109°	Noghurdoom woosh	Comarum salesovianum (Stephan) Asch. & Graebn.	Rosaceae	flower	1	Decoction	Shrub	0	0	0	0	0	0	0	0	0	0	0	0	0	0	0	0	0	0	0	0	1	0	0	0	0	0	0	0	0
Shimshal	Hunza	36.436464°	75.313109°	Noghurdoom woosh	Comarum salesovianum (Stephan) Asch. & Graebn.	Rosaceae	flower	1	Decoction	Shrub	0	0	0	0	0	0	0	0	0	0	0	0	0	0	0	0	0	0	0	0	1	0	0	0	0	0	0	0	0
Shimshal	Hunza	36.436464°	75.313109°	Noghurdoom woosh	Comarum salesovianum (Stephan) Asch. & Graebn.	Rosaceae	flower	1	Decoction	Shrub	0	0	0	0	0	0	0	0	0	0	0	0	0	0	0	0	0	0	0	0	1	0	0	0	0	0	0	0	0
Kargha	Gilgit	35.915251°	74.257648°	Ausu	Coriandrum sativum L.	Apiaceae	seed	1	decoction, direct	Herb	0	0	0	0	0	0	0	1	0	0	0	0	0	0	0	0	0	0	0	0	0	0	0	0	0	0	0	0	0
Kargha	Gilgit	35.915251°	74.257648°	Ausu	Coriandrum sativum L.	Apiaceae	seed	1	decoction, direct	Herb	0	0	0	0	0	0	0	1	0	0	0	0	0	0	0	0	0	0	0	0	0	0	0	0	0	0	0	0	0
Kargha	Gilgit	35.915251°	74.257648°	Ausu	Coriandrum sativum L.	Apiaceae	seed	1	decoction, direct	Herb	0	0	0	0	0	0	0	1	0	0	0	0	0	0	0	0	0	0	0	0	0	0	0	0	0	0	0	0	0
Kargha	Gilgit	35.915251°	74.257648°	Ausu	Coriandrum sativum L.	Apiaceae	seed	1	decoction, direct	Herb	0	0	0	0	0	0	0	1	0	0	0	0	0	0	0	0	0	0	0	0	0	0	0	0	0	0	0	0	0
Rahimabad	Gilgit	36.118837°	74.297376°	Ausu	Coriandrum sativum L.	Apiaceae	seed	1	decoction, direct	Herb	0	0	0	0	0	0	0	1	0	0	0	0	0	0	0	0	0	0	0	0	0	0	0	0	0	0	0	0	0
Rahimabad	Gilgit	36.118837°	74.297376°	Ausu	Coriandrum sativum L.	Apiaceae	seed	1	decoction, direct	Herb	0	0	0	0	0	0	0	1	0	0	0	0	0	0	0	0	0	0	0	0	0	0	0	0	0	0	0	0	0
Rahimabad	Gilgit	36.118837°	74.297376°	Ausu	Coriandrum sativum L.	Apiaceae	seed	1	decoction, direct	Herb	0	0	0	0	0	0	0	1	0	0	0	0	0	0	0	0	0	0	0	0	0	0	0	0	0	0	0	0	0
Aliabad	Hunza	36.308563°	74.619496°	Naski	Coriandrum sativum L.	Apiaceae	seed	1	decoction, direct	Herb	0	0	1	0	0	0	0	0	0	0	0	0	0	0	0	0	0	0	0	0	0	0	0	0	0	0	0	0	0
Aliabad	Hunza	36.308563°	74.619496°	Naski	Coriandrum sativum L.	Apiaceae	seed	3	decoction, direct	Herb	0	0	1	0	0	0	0	0	0	0	0	0	0	0	0	0	2	0	0	0	0	0	0	0	0	0	0	0	0
Aliabad	Hunza	36.308563°	74.619496°	Naski	Coriandrum sativum L.	Apiaceae	seed	3	decoction, direct	Herb	0	0	1	0	0	0	0	0	0	0	0	0	0	0	0	0	2	0	0	0	0	0	0	0	0	0	0	0	0
Aliabad	Hunza	36.308563°	74.619496°	Naski	Coriandrum sativum L.	Apiaceae	seed	3	decoction, direct	Herb	0	0	1	0	0	0	0	0	0	0	0	0	0	0	0	0	2	0	0	0	0	0	0	0	0	0	0	0	0
Aliabad	Hunza	36.308563°	74.619496°	Naski	Coriandrum sativum L.	Apiaceae	seed	3	decoction, direct	Herb	0	0	1	0	0	0	0	0	0	0	0	0	0	0	0	0	2	0	0	0	0	0	0	0	0	0	0	0	0
Aliabad	Hunza	36.308563°	74.619496°	Naski	Coriandrum sativum L.	Apiaceae	seed	3	decoction, direct	Herb	0	0	1	0	0	0	0	0	0	0	0	0	0	0	0	0	2	0	0	0	0	0	0	0	0	0	0	0	0
Aliabad	Hunza	36.308563°	74.619496°	Naski	Coriandrum sativum L.	Apiaceae	seed	3	decoction, direct	Herb	0	0	1	0	0	0	0	0	0	0	0	0	0	0	0	0	2	0	0	0	0	0	0	0	0	0	0	0	0
Altit	Hunza	36.316102°	74.681835°	Naski	Coriandrum sativum L.	Apiaceae	seed	2	decoction, direct	Herb	0	0	0	0	0	0	0	0	0	0	0	0	0	0	0	0	2	0	0	0	0	0	0	0	0	0	0	0	0
Karimabad	Hunza	36.326408°	74.664316°	Naski	Coriandrum sativum L.	Apiaceae	seed	2	decoction, direct	Herb	0	0	0	0	0	0	0	0	0	0	0	0	0	0	0	0	2	0	0	0	0	0	0	0	0	0	0	0	0
Karimabad	Hunza	36.326408°	74.664316°	Naski	Coriandrum sativum L.	Apiaceae	seed	1	decoction, direct	Herb	0	0	1	0	0	0	0	0	0	0	0	0	0	0	0	0	0	0	0	0	0	0	0	0	0	0	0	0	0
Karimabad	Hunza	36.326408°	74.664316°	Naski	Coriandrum sativum L.	Apiaceae	seed	1	decoction, direct	Herb	0	0	1	0	0	0	0	0	0	0	0	0	0	0	0	0	0	0	0	0	0	0	0	0	0	0	0	0	0
Murtazaabad	Hunza	36.285517°	74.607833°	Naski	Coriandrum sativum L.	Apiaceae	seed	2	decoction, direct	Herb	0	0	0	0	0	0	0	0	0	0	0	0	0	0	0	0	2	0	0	0	0	0	0	0	0	0	0	0	0
Basho	Skardu	35.469494°	75.359156°	Ausu	Coriandrum sativum L.	Apiaceae	seed	1	decoction, direct	Herb	0	0	0	0	0	0	0	1	0	0	0	0	0	0	0	0	0	0	0	0	0	0	0	0	0	0	0	0	0
Basho	Skardu	35.469494°	75.359156°	Ausu	Coriandrum sativum L.	Apiaceae	seed	1	decoction, direct	Herb	0	0	0	0	0	0	0	1	0	0	0	0	0	0	0	0	0	0	0	0	0	0	0	0	0	0	0	0	0
Basho	Skardu	35.469494°	75.359156°	Ausu	Coriandrum sativum L.	Apiaceae	seed	1	decoction, direct	Herb	0	0	0	0	0	0	0	1	0	0	0	0	0	0	0	0	0	0	0	0	0	0	0	0	0	0	0	0	0
Hashupi	Skardu	35.485929°	75.696578°	Ausu	Coriandrum sativum L.	Apiaceae	seed	1	decoction, direct	Herb	0	0	0	0	0	0	0	1	0	0	0	0	0	0	0	0	0	0	0	0	0	0	0	0	0	0	0	0	0
Hashupi	Skardu	35.485929°	75.696578°	Ausu	Coriandrum sativum L.	Apiaceae	seed	1	decoction, direct	Herb	0	0	0	0	0	0	0	1	0	0	0	0	0	0	0	0	0	0	0	0	0	0	0	0	0	0	0	0	0
Hosho	Skardu	35.345214°	75.515283°	Ausu	Coriandrum sativum L.	Apiaceae	seed	1	decoction, direct	Herb	0	0	0	0	0	0	0	1	0	0	0	0	0	0	0	0	0	0	0	0	0	0	0	0	0	0	0	0	0
Thowar	Skardu	35.609167°	75.203611°	Ausu	Coriandrum sativum L.	Apiaceae	seed	1	decoction, direct	Herb	0	0	0	0	0	0	0	1	0	0	0	0	0	0	0	0	0	0	0	0	0	0	0	0	0	0	0	0	0
Ghulkin	Hunza	36.407318°	74.863984°	Sackros/Zarvosh	Corydalis crassifolia Royle	Papaveraceae	whole plant	1	Powder/grinded	Herb	0	0	0	0	0	0	0	0	0	0	0	0	0	0	0	0	0	0	0	0	0	0	0	0	0	1	0	0	0
Ghulkin	Hunza	36.407318°	74.863984°	Sackros/Zarvosh	Corydalis crassifolia Royle	Papaveraceae	whole plant	1	Powder/grinded	Herb	0	0	0	0	0	0	0	0	0	0	0	0	0	0	0	0	0	0	0	0	0	0	0	0	0	1	0	0	0
Ghulkin	Hunza	36.407318°	74.863984°	Sackros/Zarvosh	Corydalis crassifolia Royle	Papaveraceae	whole plant	1	Powder/grinded	Herb	0	0	0	0	0	0	0	0	0	0	0	0	0	0	0	0	0	0	0	0	0	0	0	0	0	1	0	0	0
Ghulkin	Hunza	36.407318°	74.863984°	Sackros/Zarvosh	Corydalis crassifolia Royle	Papaveraceae	whole plant	1	Powder/grinded	Herb	0	0	0	0	0	0	0	0	0	0	0	0	0	0	0	0	0	0	0	0	0	0	0	0	0	1	0	0	0
Shimshal	Hunza	36.436464°	75.313109°	Sackros/Zarvosh	Corydalis crassifolia Royle	Papaveraceae	whole plant	1	Powder/grinded	Herb	0	0	0	0	0	0	0	0	0	0	0	0	0	0	0	0	0	0	0	0	0	0	0	0	0	1	0	0	0
Shimshal	Hunza	36.436464°	75.313109°	Sackros/Zarvosh	Corydalis crassifolia Royle	Papaveraceae	whole plant	1	Powder/grinded	Herb	0	0	0	0	0	0	0	0	0	0	0	0	0	0	0	0	0	0	0	0	0	0	0	0	0	1	0	0	0
Shimshal	Hunza	36.436464°	75.313109°	Sackros/Zarvosh	Corydalis crassifolia Royle	Papaveraceae	whole plant	1	Powder/grinded	Herb	0	0	0	0	0	0	0	0	0	0	0	0	0	0	0	0	0	0	0	0	0	0	0	0	0	1	0	0	0
Eidgah	Astore	35.347049°	74.857882°	Charchu	Cousinia thomsonii C.B.Clarke	Compositae	flower	1	Direct	Herb	0	1	0	0	0	0	0	0	0	0	0	0	0	0	0	0	0	0	0	0	0	0	0	0	0	0	0	0	0
Eidgah	Astore	35.347049°	74.857882°	Charchu	Cousinia thomsonii C.B.Clarke	Compositae	flower	1	Direct	Herb	0	1	0	0	0	0	0	0	0	0	0	0	0	0	0	0	0	0	0	0	0	0	0	0	0	0	0	0	0
Gorikot	Astore	35.281969°	74.841940°	Charchu	Cousinia thomsonii C.B.Clarke	Compositae	flower	1	Direct	Herb	0	1	0	0	0	0	0	0	0	0	0	0	0	0	0	0	0	0	0	0	0	0	0	0	0	0	0	0	0
Gorikot	Astore	35.281969°	74.841940°	Charchu	Cousinia thomsonii C.B.Clarke	Compositae	flower	1	Direct	Herb	0	1	0	0	0	0	0	0	0	0	0	0	0	0	0	0	0	0	0	0	0	0	0	0	0	0	0	0	0
Jaglot	Astore	35.685000°	74.623889°	Charchu	Cousinia thomsonii C.B.Clarke	Compositae	flower	1	Direct	Herb	0	1	0	0	0	0	0	0	0	0	0	0	0	0	0	0	0	0	0	0	0	0	0	0	0	0	0	0	0
Rattu	Astore	35.168461°	74.791752°1	Charchu	Cousinia thomsonii C.B.Clarke	Compositae	flower	1	Direct	Herb	0	1	0	0	0	0	0	0	0	0	0	0	0	0	0	0	0	0	0	0	0	0	0	0	0	0	0	0	0
Rattu	Astore	35.168461°	74.791752°1	Charchu	Cousinia thomsonii C.B.Clarke	Compositae	flower	1	Direct	Herb	0	1	0	0	0	0	0	0	0	0	0	0	0	0	0	0	0	0	0	0	0	0	0	0	0	0	0	0	0
Rattu	Astore	35.168461°	74.791752°1	Charchu	Cousinia thomsonii C.B.Clarke	Compositae	flower	1	Direct	Herb	0	1	0	0	0	0	0	0	0	0	0	0	0	0	0	0	0	0	0	0	0	0	0	0	0	0	0	0	0
Basho	Skardu	35.469494°	75.359156°	Charchu	Cousinia thomsonii C.B.Clarke	Compositae	flower	1	Direct	Herb	0	1	0	0	0	0	0	0	0	0	0	0	0	0	0	0	0	0	0	0	0	0	0	0	0	0	0	0	0
Hashupi	Skardu	35.485929°	75.696578°	Charchu	Cousinia thomsonii C.B.Clarke	Compositae	flower	1	Direct	Herb	0	1	0	0	0	0	0	0	0	0	0	0	0	0	0	0	0	0	0	0	0	0	0	0	0	0	0	0	0
Hashupi	Skardu	35.485929°	75.696578°	Charchu	Cousinia thomsonii C.B.Clarke	Compositae	flower	1	Direct	Herb	0	1	0	0	0	0	0	0	0	0	0	0	0	0	0	0	0	0	0	0	0	0	0	0	0	0	0	0	0
Hashupi	Skardu	35.485929°	75.696578°	Charchu	Cousinia thomsonii C.B.Clarke	Compositae	flower	1	Direct	Herb	0	1	0	0	0	0	0	0	0	0	0	0	0	0	0	0	0	0	0	0	0	0	0	0	0	0	0	0	0
Hashupi	Skardu	35.485929°	75.696578°	Charchu	Cousinia thomsonii C.B.Clarke	Compositae	flower	1	Direct	Herb	0	1	0	0	0	0	0	0	0	0	0	0	0	0	0	0	0	0	0	0	0	0	0	0	0	0	0	0	0
Hashupi	Skardu	35.485929°	75.696578°	Charchu	Cousinia thomsonii C.B.Clarke	Compositae	flower	1	Direct	Herb	0	1	0	0	0	0	0	0	0	0	0	0	0	0	0	0	0	0	0	0	0	0	0	0	0	0	0	0	0
Thowar	Skardu	35.609167°	75.203611°	Charchu	Cousinia thomsonii C.B.Clarke	Compositae	flower	1	Direct	Herb	0	1	0	0	0	0	0	0	0	0	0	0	0	0	0	0	0	0	0	0	0	0	0	0	0	0	0	0	0
Kargha	Gilgit	35.915251°	74.257648°	Zafran	Crocus sativus L.	Iridaceae	Flower	1	Powder/grinded	Herb	1	0	0	0	0	0	0	0	0	0	0	0	0	0	0	0	0	0	0	0	0	0	0	0	0	0	0	0	0
Kargha	Gilgit	35.915251°	74.257648°	Zafran	Crocus sativus L.	Iridaceae	Flower	1	Powder/grinded	Herb	1	0	0	0	0	0	0	0	0	0	0	0	0	0	0	0	0	0	0	0	0	0	0	0	0	0	0	0	0
Kargha	Gilgit	35.915251°	74.257648°	Zafran	Crocus sativus L.	Iridaceae	Flower	1	Powder/grinded	Herb	1	0	0	0	0	0	0	0	0	0	0	0	0	0	0	0	0	0	0	0	0	0	0	0	0	0	0	0	0
Kargha	Gilgit	35.915251°	74.257648°	Zafran	Crocus sativus L.	Iridaceae	Flower	1	Powder/grinded	Herb	1	0	0	0	0	0	0	0	0	0	0	0	0	0	0	0	0	0	0	0	0	0	0	0	0	0	0	0	0
Rahimabad	Gilgit	36.118837°	74.297376°	Zafran	Crocus sativus L.	Iridaceae	Flower	1	Powder/grinded	Herb	1	0	0	0	0	0	0	0	0	0	0	0	0	0	0	0	0	0	0	0	0	0	0	0	0	0	0	0	0
Rahimabad	Gilgit	36.118837°	74.297376°	Zafran	Crocus sativus L.	Iridaceae	Flower	1	Powder/grinded	Herb	1	0	0	0	0	0	0	0	0	0	0	0	0	0	0	0	0	0	0	0	0	0	0	0	0	0	0	0	0
Rahimabad	Gilgit	36.118837°	74.297376°	Zafran	Crocus sativus L.	Iridaceae	Flower	1	Powder/grinded	Herb	1	0	0	0	0	0	0	0	0	0	0	0	0	0	0	0	0	0	0	0	0	0	0	0	0	0	0	0	0
Basho	Skardu	35.469494°	75.359156°	Zafran	Crocus sativus L.	Iridaceae	Flower	1	Powder/grinded	Herb	1	0	0	0	0	0	0	0	0	0	0	0	0	0	0	0	0	0	0	0	0	0	0	0	0	0	0	0	0
Basho	Skardu	35.469494°	75.359156°	Zafran	Crocus sativus L.	Iridaceae	Flower	1	Powder/grinded	Herb	1	0	0	0	0	0	0	0	0	0	0	0	0	0	0	0	0	0	0	0	0	0	0	0	0	0	0	0	0
Basho	Skardu	35.469494°	75.359156°	Zafran	Crocus sativus L.	Iridaceae	Flower	1	Powder/grinded	Herb	1	0	0	0	0	0	0	0	0	0	0	0	0	0	0	0	0	0	0	0	0	0	0	0	0	0	0	0	0
Hashupi	Skardu	35.485929°	75.696578°	Zafran	Crocus sativus L.	Iridaceae	Flower	1	Powder/grinded	Herb	1	0	0	0	0	0	0	0	0	0	0	0	0	0	0	0	0	0	0	0	0	0	0	0	0	0	0	0	0
Hashupi	Skardu	35.485929°	75.696578°	Zafran	Crocus sativus L.	Iridaceae	Flower	1	Powder/grinded	Herb	1	0	0	0	0	0	0	0	0	0	0	0	0	0	0	0	0	0	0	0	0	0	0	0	0	0	0	0	0
Hosho	Skardu	35.345214°	75.515283°	Zafran	Crocus sativus L.	Iridaceae	Flower	1	Powder/grinded	Herb	1	0	0	0	0	0	0	0	0	0	0	0	0	0	0	0	0	0	0	0	0	0	0	0	0	0	0	0	0
Thowar	Skardu	35.609167°	75.203611°	Zafran	Crocus sativus L.	Iridaceae	Flower	1	Powder/grinded	Herb	1	0	0	0	0	0	0	0	0	0	0	0	0	0	0	0	0	0	0	0	0	0	0	0	0	0	0	0	0
Ghulmit	Nagar	36.241766°	74.462110°	Hosar	Cucurbita pepo L.	Cucurbitaceae	seed	1	Oil, direct	Herb	0	0	0	0	0	0	0	0	0	0	0	0	0	0	0	0	0	0	0	1	0	0	0	0	0	0	0	0	0
Ghulmit	Nagar	36.241766°	74.462110°	Hosar	Cucurbita pepo L.	Cucurbitaceae	seed	3	Oil, direct	Herb	0	0	0	0	0	0	0	2	0	0	0	0	0	0	0	0	0	0	0	0	0	1	0	0	0	0	0	0	0
Ghulmit	Nagar	36.241766°	74.462110°	Hosar	Cucurbita pepo L.	Cucurbitaceae	seed	3	Oil, direct	Herb	0	0	0	0	0	0	0	1	0	0	0	0	0	0	0	0	0	0	0	1	0	1	0	0	0	0	0	0	0
Ghulmit	Nagar	36.241766°	74.462110°	Hosar	Cucurbita pepo L.	Cucurbitaceae	seed	1	Oil, direct	Herb	0	0	0	0	0	0	0	1	0	0	0	0	0	0	0	0	0	0	0	0	0	0	0	0	0	0	0	0	0
Minapin	Nagar	36.250922°	74.536075°	Hosar	Cucurbita pepo L.	Cucurbitaceae	seed	1	Oil, direct	Herb	0	0	0	0	0	0	0	1	0	0	0	0	0	0	0	0	0	0	0	0	0	0	0	0	0	0	0	0	0
Minapin	Nagar	36.250922°	74.536075°	Hosar	Cucurbita pepo L.	Cucurbitaceae	seed	2	Oil, direct	Herb	0	0	0	0	0	0	0	1	0	0	0	0	0	0	0	0	0	0	0	1	0	0	0	0	0	0	0	0	0
Minapin	Nagar	36.250922°	74.536075°	Hosar	Cucurbita pepo L.	Cucurbitaceae	seed	2	Oil, direct	Herb	0	0	0	0	0	0	0	1	0	0	0	0	0	0	0	0	0	0	0	0	0	1	0	0	0	0	0	0	0
Minapin	Nagar	36.250922°	74.536075°	Hosar	Cucurbita pepo L.	Cucurbitaceae	seed	3	Oil, direct	Herb	0	0	0	0	0	0	0	2	0	0	0	0	0	0	0	0	0	0	0	0	0	1	0	0	0	0	0	0	0
Nagar Khas	Nagar	36.276377°	74.719955°	Hosar	Cucurbita pepo L.	Cucurbitaceae	seed	4	Oil, direct	Herb	0	0	0	0	0	0	0	2	0	0	0	0	0	0	0	0	0	0	0	1	0	1	0	0	0	0	0	0	0
Nagar Khas	Nagar	36.276377°	74.719955°	Hosar	Cucurbita pepo L.	Cucurbitaceae	seed	4	Oil, direct	Herb	0	0	0	0	0	0	0	2	0	0	0	0	0	0	0	0	0	0	0	1	0	1	0	0	0	0	0	0	0
Phekar	Nagar	36.263297°	74.594568°	Hosar	Cucurbita pepo L.	Cucurbitaceae	seed	2	Oil, direct	Herb	0	0	0	0	0	0	0	1	0	0	0	0	0	0	0	0	0	0	0	0	0	1	0	0	0	0	0	0	0
Phekar	Nagar	36.263297°	74.594568°	Hosar	Cucurbita pepo L.	Cucurbitaceae	seed	3	Oil, direct	Herb	0	0	0	0	0	0	0	2	0	0	0	0	0	0	0	0	0	0	0	0	0	1	0	0	0	0	0	0	0
Phekar	Nagar	36.263297°	74.594568°	Hosar	Cucurbita pepo L.	Cucurbitaceae	seed	2	Oil, direct	Herb	0	0	0	0	0	0	0	2	0	0	0	0	0	0	0	0	0	0	0	0	0	0	0	0	0	0	0	0	0
Phekar	Nagar	36.263297°	74.594568°	Hosar	Cucurbita pepo L.	Cucurbitaceae	seed	2	Oil, direct	Herb	0	0	0	0	0	0	0	1	0	0	0	0	0	0	0	0	0	0	0	1	0	0	0	0	0	0	0	0	0
Phekar	Nagar	36.263297°	74.594568°	Hosar	Cucurbita pepo L.	Cucurbitaceae	seed	1	Oil, direct	Herb	0	0	0	0	0	0	0	1	0	0	0	0	0	0	0	0	0	0	0	0	0	0	0	0	0	0	0	0	0
Phekar	Nagar	36.263297°	74.594568°	Hosar	Cucurbita pepo L.	Cucurbitaceae	seed	1	Oil, direct	Herb	0	0	0	0	0	0	0	0	0	0	0	0	0	0	0	0	0	0	0	1	0	0	0	0	0	0	0	0	0
Gahkuch	Ghizer	36.162949°	73.755492°	Saro	Cupressus sempervirens L.	Cupressaceae	fruit, stem	1	decoction, direct	Tree	0	1	0	0	0	0	0	0	0	0	0	0	0	0	0	0	0	0	0	0	0	0	0	0	0	0	0	0	0
Gahkuch	Ghizer	36.162949°	73.755492°	Saro	Cupressus sempervirens L.	Cupressaceae	fruit, stem	1	decoction, direct	Tree	0	1	0	0	0	0	0	0	0	0	0	0	0	0	0	0	0	0	0	0	0	0	0	0	0	0	0	0	0
Gahkuch	Ghizer	36.162949°	73.755492°	Saro	Cupressus sempervirens L.	Cupressaceae	fruit, stem	1	decoction, direct	Tree	0	1	0	0	0	0	0	0	0	0	0	0	0	0	0	0	0	0	0	0	0	0	0	0	0	0	0	0	0
Gahkuch	Ghizer	36.162949°	73.755492°	Saro	Cupressus sempervirens L.	Cupressaceae	fruit, stem latex	2	decoction, direct	Tree	0	1	0	0	0	0	0	1	0	0	0	0	0	0	0	0	0	0	0	0	0	0	0	0	0	0	0	0	0
Gahkuch	Ghizer	36.162949°	73.755492°	Saro	Cupressus sempervirens L.	Cupressaceae	fruit, stem	1	decoction, direct	Tree	0	1	0	0	0	0	0	0	0	0	0	0	0	0	0	0	0	0	0	0	0	0	0	0	0	0	0	0	0
Gahkuch	Ghizer	36.162949°	73.755492°	Saro	Cupressus sempervirens L.	Cupressaceae	fruit, stem latex	2	decoction, direct	Tree	0	1	0	0	0	0	0	1	0	0	0	0	0	0	0	0	0	0	0	0	0	0	0	0	0	0	0	0	0
Yaseen	Ghizer	36.369354°	73.332552°	Saro	Cupressus sempervirens L.	Cupressaceae	fruit, stem	1	decoction, direct	Tree	0	1	0	0	0	0	0	0	0	0	0	0	0	0	0	0	0	0	0	0	0	0	0	0	0	0	0	0	0
Yaseen	Ghizer	36.369354°	73.332552°	Saro	Cupressus sempervirens L.	Cupressaceae	fruit, stem latex	2	decoction, direct	Tree	0	1	0	0	0	0	0	1	0	0	0	0	0	0	0	0	0	0	0	0	0	0	0	0	0	0	0	0	0
Yaseen	Ghizer	36.369354°	73.332552°	Saro	Cupressus sempervirens L.	Cupressaceae	fruit, stem	1	decoction, direct	Tree	0	1	0	0	0	0	0	0	0	0	0	0	0	0	0	0	0	0	0	0	0	0	0	0	0	0	0	0	0
Yaseen	Ghizer	36.369354°	73.332552°	Saro	Cupressus sempervirens L.	Cupressaceae	fruit, stem latex	2	decoction, direct	Tree	0	1	0	0	0	0	0	1	0	0	0	0	0	0	0	0	0	0	0	0	0	0	0	0	0	0	0	0	0
Yaseen	Ghizer	36.369354°	73.332552°	Saro	Cupressus sempervirens L.	Cupressaceae	fruit, stem latex	2	decoction, direct	Tree	0	1	0	0	0	0	0	1	0	0	0	0	0	0	0	0	0	0	0	0	0	0	0	0	0	0	0	0	0
Yaseen	Ghizer	36.369354°	73.332552°	Saro	Cupressus sempervirens L.	Cupressaceae	fruit, stem latex	2	decoction, direct	Tree	0	1	0	0	0	0	0	1	0	0	0	0	0	0	0	0	0	0	0	0	0	0	0	0	0	0	0	0	0
Yaseen	Ghizer	36.369354°	73.332552°	Saro	Cupressus sempervirens L.	Cupressaceae	fruit, stem	1	decoction, direct	Tree	0	1	0	0	0	0	0	0	0	0	0	0	0	0	0	0	0	0	0	0	0	0	0	0	0	0	0	0	0
Yaseen	Ghizer	36.369354°	73.332552°	Saro	Cupressus sempervirens L.	Cupressaceae	fruit, stem latex	2	decoction, direct	Tree	0	1	0	0	0	0	0	1	0	0	0	0	0	0	0	0	0	0	0	0	0	0	0	0	0	0	0	0	0
Aliabad	Hunza	36.308563°	74.619496°	Halichi	Curcuma longa L.	Zingiberacaceae	stem	2	Powder/grinded	Herb	0	0	1	0	0	0	0	0	0	0	0	0	0	0	0	0	0	1	0	0	0	0	0	0	0	0	0	0	0
Altit	Hunza	36.316102°	74.681835°	Halichi	Curcuma longa L.	Zingiberacaceae	stem	2	Powder/grinded	Herb	0	0	1	0	0	0	0	0	0	0	0	0	0	0	0	0	0	1	0	0	0	0	0	0	0	0	0	0	0
Altit	Hunza	36.316102°	74.681835°	Halichi	Curcuma longa L.	Zingiberacaceae	stem	2	Powder/grinded	Herb	0	0	1	0	0	0	0	0	0	0	0	0	0	0	0	0	0	1	0	0	0	0	0	0	0	0	0	0	0
Altit	Hunza	36.316102°	74.681835°	Halichi	Curcuma longa L.	Zingiberacaceae	stem	2	Powder/grinded	Herb	0	0	1	0	0	0	0	0	0	0	0	0	0	0	0	0	0	1	0	0	0	0	0	0	0	0	0	0	0
Altit	Hunza	36.316102°	74.681835°	Halichi	Curcuma longa L.	Zingiberacaceae	stem	2	Powder/grinded	Herb	0	0	1	0	0	0	0	0	0	0	0	0	0	0	0	0	0	1	0	0	0	0	0	0	0	0	0	0	0
Altit	Hunza	36.316102°	74.681835°	Halichi	Curcuma longa L.	Zingiberacaceae	stem	2	Powder/grinded	Herb	0	0	1	0	0	0	0	0	0	0	0	0	0	0	0	0	0	1	0	0	0	0	0	0	0	0	0	0	0
Karimabad	Hunza	36.326408°	74.664316°	Halichi	Curcuma longa L.	Zingiberacaceae	stem	2	Powder/grinded	Herb	0	0	1	0	0	0	0	0	0	0	0	0	0	0	0	0	0	1	0	0	0	0	0	0	0	0	0	0	0
Murtazaabad	Hunza	36.285517°	74.607833°	Halichi	Curcuma longa L.	Zingiberacaceae	stem	2	Powder/grinded	Herb	0	0	1	0	0	0	0	0	0	0	0	0	0	0	0	0	0	1	0	0	0	0	0	0	0	0	0	0	0
Murtazaabad	Hunza	36.285517°	74.607833°	Halichi	Curcuma longa L.	Zingiberacaceae	stem	2	Powder/grinded	Herb	0	0	1	0	0	0	0	0	0	0	0	0	0	0	0	0	0	1	0	0	0	0	0	0	0	0	0	0	0
Murtazaabad	Hunza	36.285517°	74.607833°	Halichi	Curcuma longa L.	Zingiberacaceae	stem	2	Powder/grinded	Herb	0	0	1	0	0	0	0	0	0	0	0	0	0	0	0	0	0	1	0	0	0	0	0	0	0	0	0	0	0
Murtazaabad	Hunza	36.285517°	74.607833°	Halichi	Curcuma longa L.	Zingiberacaceae	stem	2	Powder/grinded	Herb	0	0	1	0	0	0	0	0	0	0	0	0	0	0	0	0	0	1	0	0	0	0	0	0	0	0	0	0	0
Ghulmit	Nagar	36.241766°	74.462110°	Halichi	Curcuma longa L.	Zingiberacaceae	stem	2	Powder/grinded	Herb	2	0	0	0	0	0	0	0	0	0	0	0	0	0	0	0	0	0	0	0	0	0	0	0	0	0	0	0	0
Ghulmit	Nagar	36.241766°	74.462110°	Halichi	Curcuma longa L.	Zingiberacaceae	stem	1	Powder/grinded	Herb	1	0	0	0	0	0	0	0	0	0	0	0	0	0	0	0	0	0	0	0	0	0	0	0	0	0	0	0	0
Ghulmit	Nagar	36.241766°	74.462110°	Halichi	Curcuma longa L.	Zingiberacaceae	stem	1	Powder/grinded	Herb	1	0	0	0	0	0	0	0	0	0	0	0	0	0	0	0	0	0	0	0	0	0	0	0	0	0	0	0	0
Ghulmit	Nagar	36.241766°	74.462110°	Halichi	Curcuma longa L.	Zingiberacaceae	stem	1	Powder/grinded	Herb	1	0	0	0	0	0	0	0	0	0	0	0	0	0	0	0	0	0	0	0	0	0	0	0	0	0	0	0	0
Minapin	Nagar	36.250922°	74.536075°	Halichi	Curcuma longa L.	Zingiberacaceae	stem	2	Powder/grinded	Herb	1	1	0	0	0	0	0	0	0	0	0	0	0	0	0	0	0	0	0	0	0	0	0	0	0	0	0	0	0
Minapin	Nagar	36.250922°	74.536075°	Halichi	Curcuma longa L.	Zingiberacaceae	stem	2	Powder/grinded	Herb	1	1	0	0	0	0	0	0	0	0	0	0	0	0	0	0	0	0	0	0	0	0	0	0	0	0	0	0	0
Minapin	Nagar	36.250922°	74.536075°	Halichi	Curcuma longa L.	Zingiberacaceae	stem	2	Powder/grinded	Herb	2	0	0	0	0	0	0	0	0	0	0	0	0	0	0	0	0	0	0	0	0	0	0	0	0	0	0	0	0
Minapin	Nagar	36.250922°	74.536075°	Halichi	Curcuma longa L.	Zingiberacaceae	stem	1	Powder/grinded	Herb	1	0	0	0	0	0	0	0	0	0	0	0	0	0	0	0	0	0	0	0	0	0	0	0	0	0	0	0	0
Nagar Khas	Nagar	36.276377°	74.719955°	Halichi	Curcuma longa L.	Zingiberacaceae	stem	1	Powder/grinded	Herb	1	0	0	0	0	0	0	0	0	0	0	0	0	0	0	0	0	0	0	0	0	0	0	0	0	0	0	0	0
Nagar Khas	Nagar	36.276377°	74.719955°	Halichi	Curcuma longa L.	Zingiberacaceae	stem	3	Powder/grinded	Herb	2	1	0	0	0	0	0	0	0	0	0	0	0	0	0	0	0	0	0	0	0	0	0	0	0	0	0	0	0
Phekar	Nagar	36.263297°	74.594568°	Halichi	Curcuma longa L.	Zingiberacaceae	stem	2	Powder/grinded	Herb	1	1	0	0	0	0	0	0	0	0	0	0	0	0	0	0	0	0	0	0	0	0	0	0	0	0	0	0	0
Phekar	Nagar	36.263297°	74.594568°	Halichi	Curcuma longa L.	Zingiberacaceae	stem	2	Powder/grinded	Herb	1	1	0	0	0	0	0	0	0	0	0	0	0	0	0	0	0	0	0	0	0	0	0	0	0	0	0	0	0
Phekar	Nagar	36.263297°	74.594568°	Halichi	Curcuma longa L.	Zingiberacaceae	stem	1	Powder/grinded	Herb	1	0	0	0	0	0	0	0	0	0	0	0	0	0	0	0	0	0	0	0	0	0	0	0	0	0	0	0	0
Phekar	Nagar	36.263297°	74.594568°	Halichi	Curcuma longa L.	Zingiberacaceae	stem	2	Powder/grinded	Herb	1	1	0	0	0	0	0	0	0	0	0	0	0	0	0	0	0	0	0	0	0	0	0	0	0	0	0	0	0
Kargha	Gilgit	35.915251°	74.257648°	Ghabol thak	Cuscuta reflexa Roxb.	Convolvulaceae	stem, flower	3	decoction, direct	Herb	0	0	0	0	0	0	0	2	0	0	0	0	0	0	0	0	0	0	0	0	0	0	0	0	0	1	0	0	0
Kargha	Gilgit	35.915251°	74.257648°	Ghabol thak	Cuscuta reflexa Roxb.	Convolvulaceae	stem, flower	3	decoction, direct	Herb	0	0	0	0	0	0	0	2	0	0	0	0	0	0	0	0	0	0	0	0	0	0	0	0	0	1	0	0	0
Kargha	Gilgit	35.915251°	74.257648°	Ghabol thak	Cuscuta reflexa Roxb.	Convolvulaceae	stem, flower	2	decoction, direct	Herb	0	0	0	0	0	0	0	2	0	0	0	0	0	0	0	0	0	0	0	0	0	0	0	0	0	0	0	0	0
Kargha	Gilgit	35.915251°	74.257648°	Ghabol thak	Cuscuta reflexa Roxb.	Convolvulaceae	stem, flower	2	decoction, direct	Herb	0	0	0	0	0	0	0	2	0	0	0	0	0	0	0	0	0	0	0	0	0	0	0	0	0	0	0	0	0
Kargha	Gilgit	35.915251°	74.257648°	Ghabol thak	Cuscuta reflexa Roxb.	Convolvulaceae	stem, flower	2	decoction, direct	Herb	0	0	0	0	0	0	0	1	0	0	0	0	0	0	0	0	0	0	0	0	0	0	0	0	0	1	0	0	0
Rahimabad	Gilgit	36.118837°	74.297376°	Ghabol thak	Cuscuta reflexa Roxb.	Convolvulaceae	stem, flower	2	decoction, direct	Herb	0	0	0	0	0	0	0	1	0	0	0	0	0	0	0	0	0	0	0	0	0	0	0	0	0	1	0	0	0
Rahimabad	Gilgit	36.118837°	74.297376°	Ghabol thak	Cuscuta reflexa Roxb.	Convolvulaceae	stem, flower	2	decoction, direct	Herb	0	0	0	0	0	0	0	1	0	0	0	0	0	0	0	0	0	0	0	0	0	0	0	0	0	1	0	0	0
Basho	Skardu	35.469494°	75.359156°	Ghbul thaq	Cuscuta reflexa Roxb.	Convolvulaceae	whole plant	2	Direct	Herb	0	0	0	1	0	0	0	1	0	0	0	0	0	0	0	0	0	0	0	0	0	0	0	0	0	0	0	0	0
Hashupi	Skardu	35.485929°	75.696578°	Ghbul thaq	Cuscuta reflexa Roxb.	Convolvulaceae	whole plant	2	Direct	Herb	0	0	0	1	0	0	0	1	0	0	0	0	0	0	0	0	0	0	0	0	0	0	0	0	0	0	0	0	0
Hashupi	Skardu	35.485929°	75.696578°	Ghbul thaq	Cuscuta reflexa Roxb.	Convolvulaceae	whole plant	1	Direct	Herb	0	0	0	1	0	0	0	0	0	0	0	0	0	0	0	0	0	0	0	0	0	0	0	0	0	0	0	0	0
Hashupi	Skardu	35.485929°	75.696578°	Ghbul thaq	Cuscuta reflexa Roxb.	Convolvulaceae	whole plant	1	Direct	Herb	0	0	0	1	0	0	0	0	0	0	0	0	0	0	0	0	0	0	0	0	0	0	0	0	0	0	0	0	0
Hashupi	Skardu	35.485929°	75.696578°	Ghbul thaq	Cuscuta reflexa Roxb.	Convolvulaceae	whole plant	1	Direct	Herb	0	0	0	1	0	0	0	0	0	0	0	0	0	0	0	0	0	0	0	0	0	0	0	0	0	0	0	0	0
Hashupi	Skardu	35.485929°	75.696578°	Ghbul thaq	Cuscuta reflexa Roxb.	Convolvulaceae	whole plant	1	Direct	Herb	0	0	0	1	0	0	0	0	0	0	0	0	0	0	0	0	0	0	0	0	0	0	0	0	0	0	0	0	0
Thowar	Skardu	35.609167°	75.203611°	Ghbul thaq	Cuscuta reflexa Roxb.	Convolvulaceae	whole plant	2	Direct	Herb	0	0	0	1	0	0	0	1	0	0	0	0	0	0	0	0	0	0	0	0	0	0	0	0	0	0	0	0	0
Kargha	Gilgit	35.915251°	74.257648°	Izkhar Makki	Cymbopogon jwarancusa (Jones) Schult.	Poaceae	flower	2	Decoction	Grass	0	0	0	0	0	0	0	0	0	0	0	0	0	0	0	0	0	0	0	0	0	0	0	2	0	0	0	0	0
Kargha	Gilgit	35.915251°	74.257648°	Izkhar Makki	Cymbopogon jwarancusa (Jones) Schult.	Poaceae	flower	2	Decoction	Grass	0	0	0	0	0	0	0	0	0	0	0	0	0	0	0	0	0	0	0	0	0	0	0	2	0	0	0	0	0
Kargha	Gilgit	35.915251°	74.257648°	Izkhar Makki	Cymbopogon jwarancusa (Jones) Schult.	Poaceae	flower	1	Decoction	Grass	0	0	0	0	0	0	0	0	0	0	0	0	0	0	0	0	0	0	0	0	0	0	0	1	0	0	0	0	0
Kargha	Gilgit	35.915251°	74.257648°	Izkhar Makki	Cymbopogon jwarancusa (Jones) Schult.	Poaceae	flower	2	Decoction	Grass	0	1	0	0	0	0	0	0	0	0	0	0	0	0	0	0	0	0	0	0	0	0	0	1	0	0	0	0	0
Kargha	Gilgit	35.915251°	74.257648°	Izkhar Makki	Cymbopogon jwarancusa (Jones) Schult.	Poaceae	flower	3	Decoction	Grass	0	1	0	0	0	0	0	0	0	0	0	0	0	0	0	0	0	0	0	0	0	0	0	2	0	0	0	0	0
Rahimabad	Gilgit	36.118837°	74.297376°	Izkhar Makki	Cymbopogon jwarancusa (Jones) Schult.	Poaceae	flower	3	Decoction	Grass	0	1	0	0	0	0	0	0	0	0	0	0	0	0	0	0	0	0	0	0	0	0	0	2	0	0	0	0	0
Rahimabad	Gilgit	36.118837°	74.297376°	Izkhar Makki	Cymbopogon jwarancusa (Jones) Schult.	Poaceae	flower	2	Decoction	Grass	0	0	0	0	0	0	0	0	0	0	0	0	0	0	0	0	0	0	0	0	0	0	0	2	0	0	0	0	0
Ghulkin	Hunza	36.407318°	74.863984°	Narmada	Dactylorhiza hatagirea (D.Don) Soó	Orchidaceae	root, rhizomes	2	Powder/grinded	Herb	0	0	0	0	0	0	0	0	0	0	0	0	0	0	0	0	0	0	0	0	0	0	0	0	0	0	2	0	0
Ghulkin	Hunza	36.407318°	74.863984°	Narmada	Dactylorhiza hatagirea (D.Don) Soó	Orchidaceae	root, rhizomes	2	Powder/grinded	Herb	0	0	0	0	0	0	0	0	0	0	0	0	0	0	0	0	0	0	0	0	0	0	0	0	0	0	2	0	0
Ghulkin	Hunza	36.407318°	74.863984°	Narmada	Dactylorhiza hatagirea (D.Don) Soó	Orchidaceae	root, rhizomes	2	Powder/grinded	Herb	0	0	0	0	0	0	0	0	0	0	0	0	0	0	0	0	0	0	0	0	0	0	0	0	0	0	2	0	0
Ghulkin	Hunza	36.407318°	74.863984°	Narmada	Dactylorhiza hatagirea (D.Don) Soó	Orchidaceae	root, rhizomes	2	Powder/grinded	Herb	0	0	0	0	0	0	0	0	0	0	0	0	0	0	0	0	0	0	0	0	0	0	0	0	0	0	2	0	0
Ghulkin	Hunza	36.407318°	74.863984°	Narmada	Dactylorhiza hatagirea (D.Don) Soó	Orchidaceae	root, rhizomes	1	Powder/grinded	Herb	0	0	0	0	0	0	0	0	0	0	0	0	0	0	0	0	0	0	0	0	0	0	0	0	0	0	1	0	0
Shimshal	Hunza	36.436464°	75.313109°	Narmada	Dactylorhiza hatagirea (D.Don) Soó	Orchidaceae	root, rhizomes	1	Powder/grinded	Herb	0	0	0	0	0	0	0	0	0	0	0	0	0	0	0	0	0	0	0	0	0	0	0	0	0	0	1	0	0
Shimshal	Hunza	36.436464°	75.313109°	Narmada	Dactylorhiza hatagirea (D.Don) Soó	Orchidaceae	root, rhizomes	1	Powder/grinded	Herb	0	0	0	0	0	0	0	0	0	0	0	0	0	0	0	0	0	0	0	0	0	0	0	0	0	0	1	0	0
Bilchar/Bagrote	Gilgit	35.942517°	74.545274°	Nirko	Daphne mucronata Royle	Thymelaeaceae	leaves, fruit, wood	2	Paste, poultice	Shrub	0	0	1	0	0	1	0	0	0	0	0	0	0	0	0	0	0	0	0	0	0	0	0	0	0	0	0	0	0
Bilchar/Bagrote	Gilgit	35.942517°	74.545274°	Nirko	Daphne mucronata Royle	Thymelaeaceae	leaves, fruit, wood	3	Paste, poultice	Shrub	0	0	0	0	0	1	0	0	0	0	0	0	0	0	0	0	0	0	1	0	1	0	0	0	0	0	0	0	0
Bilchar/Bagrote	Gilgit	35.942517°	74.545274°	Nirko	Daphne mucronata Royle	Thymelaeaceae	leaves, fruit, wood	4	Paste, poultice	Shrub	0	0	1	0	0	1	0	0	0	0	0	0	0	0	0	0	0	0	1	0	1	0	0	0	0	0	0	0	0
Bilchar/Bagrote	Gilgit	35.942517°	74.545274°	Nirko	Daphne mucronata Royle	Thymelaeaceae	leaves, fruit, wood	4	Paste, poultice	Shrub	0	0	1	0	0	1	0	0	0	0	0	0	0	0	0	0	0	0	1	0	1	0	0	0	0	0	0	0	0
Danyore	Gilgit	35.919880°	74.386181°	Nirko	Daphne mucronata Royle	Thymelaeaceae	leaves, fruit, wood	4	Paste, poultice	Shrub	0	0	1	0	0	1	0	0	0	0	0	0	0	0	0	0	0	0	1	0	1	0	0	0	0	0	0	0	0
Danyore	Gilgit	35.919880°	74.386181°	Nirko	Daphne mucronata Royle	Thymelaeaceae	leaves, fruit, wood	3	Paste, poultice	Shrub	0	0	1	0	0	1	0	0	0	0	0	0	0	0	0	0	0	0	1	0	0	0	0	0	0	0	0	0	0
Danyore	Gilgit	35.919880°	74.386181°	Nirko	Daphne mucronata Royle	Thymelaeaceae	leaves, fruit, wood	3	Paste, poultice	Shrub	0	0	1	0	0	1	0	0	0	0	0	0	0	0	0	0	0	0	0	0	1	0	0	0	0	0	0	0	0
Danyore	Gilgit	35.919880°	74.386181°	Nirko	Daphne mucronata Royle	Thymelaeaceae	leaves, fruit, wood	4	Paste, poultice	Shrub	0	0	1	0	0	1	0	0	0	0	0	0	0	0	0	0	0	0	1	0	1	0	0	0	0	0	0	0	0
Danyore	Gilgit	35.919880°	74.386181°	Nirko	Daphne mucronata Royle	Thymelaeaceae	leaves, fruit, wood	4	Paste, poultice	Shrub	0	0	1	0	0	1	0	0	0	0	0	0	0	0	0	0	0	0	1	0	1	0	0	0	0	0	0	0	0
Jalalabad	Gilgit	35.880457°	74.493590°	Nirko	Daphne mucronata Royle	Thymelaeaceae	leaves, fruit, wood	3	Paste, poultice	Shrub	0	0	1	0	0	1	0	0	0	0	0	0	0	0	0	0	0	0	0	0	1	0	0	0	0	0	0	0	0
Jalalabad	Gilgit	35.880457°	74.493590°	Nirko	Daphne mucronata Royle	Thymelaeaceae	leaves, fruit, wood	3	Paste, poultice	Shrub	0	0	0	0	0	1	0	0	0	0	0	0	0	0	0	0	0	0	1	0	1	0	0	0	0	0	0	0	0
Jalalabad	Gilgit	35.880457°	74.493590°	Nirko	Daphne mucronata Royle	Thymelaeaceae	leaves, fruit, wood	4	Paste, poultice	Shrub	0	0	1	0	0	1	0	0	0	0	0	0	0	0	0	0	0	0	1	0	1	0	0	0	0	0	0	0	0
Jalalabad	Gilgit	35.880457°	74.493590°	Nirko	Daphne mucronata Royle	Thymelaeaceae	leaves, fruit, wood	4	Paste, poultice	Shrub	0	0	1	0	0	1	0	0	0	0	0	0	0	0	0	0	0	0	1	0	1	0	0	0	0	0	0	0	0
Gahkuch	Ghizer	36.162949°	73.755492°	Daturo	Datura stramonium L.	Solanaceae	flower, seed, leaves	8	Decoction, ash, paste	Herb	0	1	2	0	0	0	0	0	0	0	3	0	0	0	0	0	0	0	0	0	0	0	1	1	0	0	0	0	0
Gahkuch	Ghizer	36.162949°	73.755492°	Daturo	Datura stramonium L.	Solanaceae	flower, seed, leaves	5	Decoction, ash, paste	Herb	0	1	0	0	0	0	0	0	0	0	2	0	0	0	0	0	0	0	0	0	0	0	1	1	0	0	0	0	0
Gahkuch	Ghizer	36.162949°	73.755492°	Daturo	Datura stramonium L.	Solanaceae	flower, seed, leaves	5	Decoction, paste	Herb	0	0	1	0	0	0	0	0	0	0	2	0	0	0	0	0	0	0	0	0	0	0	1	1	0	0	0	0	0
Gahkuch	Ghizer	36.162949°	73.755492°	Daturo	Datura stramonium L.	Solanaceae	seed, fruit, leaves	7	Decoction, paste	Herb	0	0	2	0	0	0	0	0	0	0	3	0	0	0	0	0	0	0	0	0	0	0	1	1	0	0	0	0	0
Gahkuch	Ghizer	36.162949°	73.755492°	Daturo	Datura stramonium L.	Solanaceae	flower, seed, leaves	7	Decoction, paste	Herb	0	0	2	0	0	0	0	0	0	0	3	0	0	0	0	0	0	0	0	0	0	0	1	1	0	0	0	0	0
Gahkuch	Ghizer	36.162949°	73.755492°	Daturo	Datura stramonium L.	Solanaceae	seed, fruit, leaves	2	Decoction, paste	Herb	0	0	1	0	0	0	0	0	0	0	1	0	0	0	0	0	0	0	0	0	0	0	0	0	0	0	0	0	0
Yaseen	Ghizer	36.369354°	73.332552°	Daturo	Datura stramonium L.	Solanaceae	seed, fruit, leaves	8	Decoction, ash, paste	Herb	0	1	2	0	0	0	0	0	0	0	3	0	0	0	0	0	0	0	0	0	0	0	1	1	0	0	0	0	0
Yaseen	Ghizer	36.369354°	73.332552°	Daturo	Datura stramonium L.	Solanaceae	flower, seed, leaves	8	Decoction, ash, paste	Herb	0	1	2	0	0	0	0	0	0	0	3	0	0	0	0	0	0	0	0	0	0	0	1	1	0	0	0	0	0
Yaseen	Ghizer	36.369354°	73.332552°	Daturo	Datura stramonium L.	Solanaceae	seed, fruit, leaves	8	Decoction, ash, paste	Herb	0	1	2	0	0	0	0	0	0	0	3	0	0	0	0	0	0	0	0	0	0	0	1	1	0	0	0	0	0
Yaseen	Ghizer	36.369354°	73.332552°	Daturo	Datura stramonium L.	Solanaceae	seed, fruit, leaves	1	paste	Herb	0	0	0	0	0	0	0	0	0	0	1	0	0	0	0	0	0	0	0	0	0	0	0	0	0	0	0	0	0
Yaseen	Ghizer	36.369354°	73.332552°	Daturo	Datura stramonium L.	Solanaceae	seed, fruit, leaves	2	Decoction, paste	Herb	0	1	0	0	0	0	0	0	0	0	1	0	0	0	0	0	0	0	0	0	0	0	0	0	0	0	0	0	0
Yaseen	Ghizer	36.369354°	73.332552°	Daturo	Datura stramonium L.	Solanaceae	flower, seed, leaves	4	Decoction, ash, paste	Herb	0	1	1	0	0	0	0	0	0	0	1	0	0	0	0	0	0	0	0	0	0	0	1	0	0	0	0	0	0
Kargha	Gilgit	35.915251°	74.257648°	Daturo	Datura stramonium L.	Solanaceae	flower, fruit, seed, leaves	6	Decoction, ash, paste	Herb	0	1	2	0	0	0	0	0	0	0	1	0	0	0	0	0	0	0	0	0	0	0	1	1	0	0	0	0	0
Kargha	Gilgit	35.915251°	74.257648°	Daturo	Datura stramonium L.	Solanaceae	flower, fruit, seed, leaves	6	Decoction, ash, paste	Herb	0	1	1	0	0	0	0	0	0	0	2	0	0	0	0	0	0	0	0	0	0	0	1	1	0	0	0	0	0
Kargha	Gilgit	35.915251°	74.257648°	Daturo	Datura stramonium L.	Solanaceae	flower, fruit, seed, leaves	2	Decoction, ash, paste	Herb	0	1	0	0	0	0	0	0	0	0	1	0	0	0	0	0	0	0	0	0	0	0	0	0	0	0	0	0	0
Kargha	Gilgit	35.915251°	74.257648°	Daturo	Datura stramonium L.	Solanaceae	flower, fruit, seed, leaves	3	Decoction, ash, paste	Herb	0	1	1	0	0	0	0	0	0	0	0	0	0	0	0	0	0	0	0	0	0	0	1	0	0	0	0	0	0
Kargha	Gilgit	35.915251°	74.257648°	Daturo	Datura stramonium L.	Solanaceae	flower, fruit, seed, leaves	7	Decoction, ash, paste	Herb	0	2	2	0	0	0	0	0	0	0	2	0	0	0	0	0	0	0	0	0	0	0	0	1	0	0	0	0	0
Rahimabad	Gilgit	36.118837°	74.297376°	Daturo	Datura stramonium L.	Solanaceae	flower, fruit, seed, leaves	8	Decoction, ash, paste	Herb	0	2	2	0	0	0	0	0	0	0	2	0	0	0	0	0	0	0	0	0	0	0	1	1	0	0	0	0	0
Rahimabad	Gilgit	36.118837°	74.297376°	Daturo	Datura stramonium L.	Solanaceae	flower, fruit, seed, leaves	1	paste	Herb	0	1	0	0	0	0	0	0	0	0	0	0	0	0	0	0	0	0	0	0	0	0	0	0	0	0	0	0	0
Aliabad	Hunza	36.308563°	74.619496°	Dhatura	Datura stramonium L.	Solanaceae	seed	3	Decoction, paste	Herb	0	0	0	0	0	0	0	1	0	0	1	0	0	0	0	0	0	0	0	0	0	0	1	0	0	0	0	0	0
Aliabad	Hunza	36.308563°	74.619496°	Dhatura	Datura stramonium L.	Solanaceae	seed	1	Decoction, paste	Herb	0	0	0	0	0	0	0	0	0	0	1	0	0	0	0	0	0	0	0	0	0	0	0	0	0	0	0	0	0
Aliabad	Hunza	36.308563°	74.619496°	Dhatura	Datura stramonium L.	Solanaceae	seed	3	Decoction, paste	Herb	0	0	0	0	0	0	0	1	0	0	1	0	0	0	0	0	0	0	0	0	0	0	1	0	0	0	0	0	0
Aliabad	Hunza	36.308563°	74.619496°	Dhatura	Datura stramonium L.	Solanaceae	seed	2	Decoction, paste	Herb	0	0	0	0	0	0	0	1	0	0	1	0	0	0	0	0	0	0	0	0	0	0	0	0	0	0	0	0	0
Aliabad	Hunza	36.308563°	74.619496°	Dhatura	Datura stramonium L.	Solanaceae	seed	3	Decoction, paste	Herb	0	0	0	0	0	0	0	1	0	0	1	0	0	0	0	0	0	0	0	0	0	0	1	0	0	0	0	0	0
Aliabad	Hunza	36.308563°	74.619496°	Dhatura	Datura stramonium L.	Solanaceae	seed	2	Decoction, paste	Herb	0	0	0	0	0	0	0	1	0	0	1	0	0	0	0	0	0	0	0	0	0	0	0	0	0	0	0	0	0
Altit	Hunza	36.316102°	74.681835°	Dhatura	Datura stramonium L.	Solanaceae	seed	2	Decoction, paste	Herb	0	0	0	0	0	0	0	1	0	0	1	0	0	0	0	0	0	0	0	0	0	0	0	0	0	0	0	0	0
Altit	Hunza	36.316102°	74.681835°	Dhatura	Datura stramonium L.	Solanaceae	seed	1	Decoction, paste	Herb	0	0	0	0	0	0	0	0	0	0	1	0	0	0	0	0	0	0	0	0	0	0	0	0	0	0	0	0	0
Altit	Hunza	36.316102°	74.681835°	Dhatura	Datura stramonium L.	Solanaceae	seed	3	Decoction, paste	Herb	0	0	0	0	0	0	0	1	0	0	1	0	0	0	0	0	0	0	0	0	0	0	1	0	0	0	0	0	0
Karimabad	Hunza	36.326408°	74.664316°	Dhatura	Datura stramonium L.	Solanaceae	seed	3	Decoction, paste	Herb	0	0	0	0	0	0	0	1	0	0	1	0	0	0	0	0	0	0	0	0	0	0	1	0	0	0	0	0	0
Karimabad	Hunza	36.326408°	74.664316°	Dhatura	Datura stramonium L.	Solanaceae	seed	1	Decoction, paste	Herb	0	0	0	0	0	0	0	0	0	0	1	0	0	0	0	0	0	0	0	0	0	0	0	0	0	0	0	0	0
Karimabad	Hunza	36.326408°	74.664316°	Dhatura	Datura stramonium L.	Solanaceae	seed	3	Decoction, paste	Herb	0	0	0	0	0	0	0	1	0	0	1	0	0	0	0	0	0	0	0	0	0	0	1	0	0	0	0	0	0
Murtazaabad	Hunza	36.285517°	74.607833°	Dhatura	Datura stramonium L.	Solanaceae	seed	3	Decoction, paste	Herb	0	0	0	0	0	0	0	1	0	0	1	0	0	0	0	0	0	0	0	0	0	0	1	0	0	0	0	0	0
Kargha	Gilgit	35.915251°	74.257648°	Phopuce/Jangli/Jut Ghachoon	Daucus carota L.	Apiaceae	seed, leaves	1	Direct, decoction	Herb	0	0	0	1	0	0	0	0	0	0	0	0	0	0	0	0	0	0	0	0	0	0	0	0	0	0	0	0	0
Kargha	Gilgit	35.915251°	74.257648°	Phopuce/Jangli/Jut Ghachoon	Daucus carota L.	Apiaceae	seed, leaves	1	Direct, decoction	Herb	0	0	0	1	0	0	0	0	0	0	0	0	0	0	0	0	0	0	0	0	0	0	0	0	0	0	0	0	0
Kargha	Gilgit	35.915251°	74.257648°	Phopuce/Jangli/Jut Ghachoon	Daucus carota L.	Apiaceae	seed, leaves	1	Direct, decoction	Herb	0	0	0	1	0	0	0	0	0	0	0	0	0	0	0	0	0	0	0	0	0	0	0	0	0	0	0	0	0
Kargha	Gilgit	35.915251°	74.257648°	Phopuce/Jangli/Jut Ghachoon	Daucus carota L.	Apiaceae	seed, leaves	1	Direct, decoction	Herb	0	0	0	1	0	0	0	0	0	0	0	0	0	0	0	0	0	0	0	0	0	0	0	0	0	0	0	0	0
Rahimabad	Gilgit	36.118837°	74.297376°	Phopuce/Jangli/Jut Ghachoon	Daucus carota L.	Apiaceae	seed, leaves	1	Direct, decoction	Herb	0	0	0	1	0	0	0	0	0	0	0	0	0	0	0	0	0	0	0	0	0	0	0	0	0	0	0	0	0
Rahimabad	Gilgit	36.118837°	74.297376°	Phopuce/Jangli/Jut Ghachoon	Daucus carota L.	Apiaceae	seed, leaves	1	Direct, decoction	Herb	0	0	0	1	0	0	0	0	0	0	0	0	0	0	0	0	0	0	0	0	0	0	0	0	0	0	0	0	0
Rahimabad	Gilgit	36.118837°	74.297376°	Phopuce/Jangli/Jut Ghachoon	Daucus carota L.	Apiaceae	seed, leaves	1	Direct, decoction	Herb	0	0	0	1	0	0	0	0	0	0	0	0	0	0	0	0	0	0	0	0	0	0	0	0	0	0	0	0	0
Altit	Hunza	36.316102°	74.681835°	Ghasoon	Daucus carota L.	Apiaceae	seed	1	Direct, decoction	Herb	0	0	0	0	0	0	0	0	0	0	0	0	0	0	0	0	0	0	0	0	0	0	0	0	0	0	0	0	1
Altit	Hunza	36.316102°	74.681835°	Ghasoon	Daucus carota L.	Apiaceae	seed	1	Direct, decoction	Herb	0	0	0	0	0	0	0	0	0	0	0	0	0	0	0	0	0	0	0	0	0	0	0	0	0	0	0	0	1
Altit	Hunza	36.316102°	74.681835°	Ghasoon	Daucus carota L.	Apiaceae	seed	1	Direct, decoction	Herb	0	0	0	0	0	0	0	0	0	0	0	0	0	0	0	0	0	0	0	0	0	0	0	0	0	0	0	0	1
Karimabad	Hunza	36.326408°	74.664316°	Ghasoon	Daucus carota L.	Apiaceae	seed	1	Direct, decoction	Herb	0	0	0	0	0	0	0	0	0	0	0	0	0	0	0	0	0	0	0	0	0	0	0	0	0	0	0	0	1
Murtazaabad	Hunza	36.285517°	74.607833°	Ghasoon	Daucus carota L.	Apiaceae	seed	1	Direct, decoction	Herb	0	0	0	0	0	0	0	0	0	0	0	0	0	0	0	0	0	0	0	0	0	0	0	0	0	0	0	0	1
Murtazaabad	Hunza	36.285517°	74.607833°	Ghasoon	Daucus carota L.	Apiaceae	seed	1	Direct, decoction	Herb	0	0	0	0	0	0	0	0	0	0	0	0	0	0	0	0	0	0	0	0	0	0	0	0	0	0	0	0	1
Murtazaabad	Hunza	36.285517°	74.607833°	Ghasoon	Daucus carota L.	Apiaceae	seed	1	Direct, decoction	Herb	0	0	0	0	0	0	0	0	0	0	0	0	0	0	0	0	0	0	0	0	0	0	0	0	0	0	0	0	1
Ghulmit	Nagar	36.241766°	74.462110°	Ghasoon	Daucus carota L.	Apiaceae	seed	1	Direct, decoction	Herb	0	0	0	1	0	0	0	0	0	0	0	0	0	0	0	0	0	0	0	0	0	0	0	0	0	0	0	0	0
Ghulmit	Nagar	36.241766°	74.462110°	Ghasoon	Daucus carota L.	Apiaceae	seed	2	Direct, decoction	Herb	0	0	0	1	0	0	0	0	0	0	0	0	0	0	0	0	0	0	0	0	1	0	0	0	0	0	0	0	0
Ghulmit	Nagar	36.241766°	74.462110°	Ghasoon	Daucus carota L.	Apiaceae	leaves	2	Direct, decoction	Herb	0	0	0	0	0	0	0	0	0	0	0	0	0	0	0	0	0	0	0	0	1	0	0	0	0	1	0	0	0
Ghulmit	Nagar	36.241766°	74.462110°	Ghasoon	Daucus carota L.	Apiaceae	leaves	3	Direct, decoction	Herb	0	0	0	1	0	0	0	0	0	0	0	0	0	0	0	0	0	0	0	0	1	0	0	0	0	1	0	0	0
Ghulmit	Nagar	36.241766°	74.462110°	Ghasoon	Daucus carota L.	Apiaceae	seed	2	Direct, decoction	Herb	0	0	0	1	0	0	0	0	0	0	0	0	0	0	0	0	0	0	0	0	1	0	0	0	0	0	0	0	0
Minapin	Nagar	36.250922°	74.536075°	Ghasoon	Daucus carota L.	Apiaceae	seed	2	Direct, decoction	Herb	0	0	0	0	0	0	0	0	0	0	0	0	0	0	0	0	0	0	0	0	1	0	0	0	0	1	0	0	0
Minapin	Nagar	36.250922°	74.536075°	Ghasoon	Daucus carota L.	Apiaceae	leaves	1	Direct, decoction	Herb	0	0	0	0	0	0	0	0	0	0	0	0	0	0	0	0	0	0	0	0	0	0	0	0	0	1	0	0	0
Minapin	Nagar	36.250922°	74.536075°	Ghasoon	Daucus carota L.	Apiaceae	seed	1	Direct, decoction	Herb	0	0	0	0	0	0	0	0	0	0	0	0	0	0	0	0	0	0	0	0	0	0	0	0	0	0	0	0	1
Minapin	Nagar	36.250922°	74.536075°	Ghasoon	Daucus carota L.	Apiaceae	seed	2	Direct, decoction	Herb	0	0	0	0	0	0	0	0	0	0	0	0	0	0	0	0	0	0	0	0	1	0	0	0	0	0	0	0	1
Minapin	Nagar	36.250922°	74.536075°	Ghasoon	Daucus carota L.	Apiaceae	leaves	2	Direct, decoction	Herb	0	0	0	0	0	0	0	0	0	0	0	0	0	0	0	0	0	0	0	0	1	0	0	0	0	1	0	0	0
Nagar Khas	Nagar	36.276377°	74.719955°	Ghasoon	Daucus carota L.	Apiaceae	seed	3	Direct, decoction	Herb	0	0	0	1	0	0	0	0	0	0	0	0	0	0	0	0	0	0	0	0	1	0	0	0	0	0	0	0	1
Nagar Khas	Nagar	36.276377°	74.719955°	Ghasoon	Daucus carota L.	Apiaceae	seed	2	Direct, decoction	Herb	0	0	0	1	0	0	0	0	0	0	0	0	0	0	0	0	0	0	0	0	1	0	0	0	0	0	0	0	0
Nagar Khas	Nagar	36.276377°	74.719955°	Ghasoon	Daucus carota L.	Apiaceae	seed	2	Direct, decoction	Herb	0	0	0	1	0	0	0	0	0	0	0	0	0	0	0	0	0	0	0	0	0	0	0	0	0	0	0	0	1
Phekar	Nagar	36.263297°	74.594568°	Ghasoon	Daucus carota L.	Apiaceae	seed	2	Direct, decoction	Herb	0	0	0	0	0	0	0	0	0	0	0	0	0	0	0	0	0	0	0	0	1	0	0	0	0	0	0	0	1
Phekar	Nagar	36.263297°	74.594568°	Ghasoon	Daucus carota L.	Apiaceae	seed	2	Direct, decoction	Herb	0	0	0	1	0	0	0	0	0	0	0	0	0	0	0	0	0	0	0	0	0	0	0	0	0	0	0	0	1
Phekar	Nagar	36.263297°	74.594568°	Ghasoon	Daucus carota L.	Apiaceae	seed	3	Direct, decoction	Herb	0	0	0	1	0	0	0	0	0	0	0	0	0	0	0	0	0	0	0	0	1	0	0	0	0	0	0	0	1
Phekar	Nagar	36.263297°	74.594568°	Ghasoon	Daucus carota L.	Apiaceae	seed	2	Direct, decoction	Herb	0	0	0	1	0	0	0	0	0	0	0	0	0	0	0	0	0	0	0	0	0	0	0	0	0	0	0	0	1
Phekar	Nagar	36.263297°	74.594568°	Ghasoon	Daucus carota L.	Apiaceae	leaves	2	Direct, decoction	Herb	0	0	0	0	0	0	0	0	0	0	0	0	0	0	0	0	0	0	0	0	1	0	0	0	0	1	0	0	0
Basho	Skardu	35.469494°	75.359156°	Gholafuvi lona	Daucus carota L.	Apiaceae	leaves	1	Direct, decoction	Herb	0	0	0	0	0	0	0	0	0	0	0	0	0	0	0	0	0	0	0	0	0	0	0	0	0	1	0	0	0
Basho	Skardu	35.469494°	75.359156°	Gholafuvi lona	Daucus carota L.	Apiaceae	leaves	1	Direct, decoction	Herb	0	0	0	0	0	0	0	0	0	0	0	0	0	0	0	0	0	0	0	0	0	0	0	0	0	1	0	0	0
Basho	Skardu	35.469494°	75.359156°	Gholafuvi lona	Daucus carota L.	Apiaceae	leaves	1	Direct, decoction	Herb	0	0	0	0	0	0	0	0	0	0	0	0	0	0	0	0	0	0	0	0	0	0	0	0	0	1	0	0	0
Basho	Skardu	35.469494°	75.359156°	Gholafuvi lona	Daucus carota L.	Apiaceae	leaves	1	Direct, decoction	Herb	0	0	0	0	0	0	0	0	0	0	0	0	0	0	0	0	0	0	0	0	0	0	0	0	0	1	0	0	0
Hashupi	Skardu	35.485929°	75.696578°	Gholafuvi lona	Daucus carota L.	Apiaceae	leaves	1	Direct, decoction	Herb	0	0	0	0	0	0	0	0	0	0	0	0	0	0	0	0	0	0	0	0	0	0	0	0	0	1	0	0	0
Hosho	Skardu	35.345214°	75.515283°	Gholafuvi lona	Daucus carota L.	Apiaceae	leaves	1	Direct, decoction	Herb	0	0	0	0	0	0	0	0	0	0	0	0	0	0	0	0	0	0	0	0	0	0	0	0	0	1	0	0	0
Thowar	Skardu	35.609167°	75.203611°	Gholafuvi lona	Daucus carota L.	Apiaceae	leaves	1	Direct, decoction	Herb	0	0	0	0	0	0	0	0	0	0	0	0	0	0	0	0	0	0	0	0	0	0	0	0	0	1	0	0	0
Eidgah	Astore	35.347049°	74.857882°	Makhoting	Delphinium brunonianum Royle	Ranunculaceae	whole plant	1	Decoction, powder/grinded	Herb	0	0	0	0	0	0	0	0	0	0	0	0	0	0	0	0	0	0	0	0	0	0	0	1	0	0	0	0	0
Eidgah	Astore	35.347049°	74.857882°	Makhoting	Delphinium brunonianum Royle	Ranunculaceae	whole plant	1	Decoction, powder/grinded	Herb	0	0	0	0	0	0	0	0	0	0	0	0	0	0	0	0	0	0	0	0	0	0	0	1	0	0	0	0	0
Eidgah	Astore	35.347049°	74.857882°	Makhoting	Delphinium brunonianum Royle	Ranunculaceae	whole plant	1	Decoction, powder/grinded	Herb	0	0	0	0	0	0	0	0	0	0	0	0	0	0	0	0	0	0	0	0	0	0	0	1	0	0	0	0	0
Gorikot	Astore	35.281969°	74.841940°	Makhoting	Delphinium brunonianum Royle	Ranunculaceae	whole plant	1	Decoction, powder/grinded	Herb	0	0	0	0	0	0	0	0	0	0	0	0	0	0	0	0	0	0	0	0	0	0	0	1	0	0	0	0	0
Gorikot	Astore	35.281969°	74.841940°	Makhoting	Delphinium brunonianum Royle	Ranunculaceae	whole plant	1	Decoction, powder/grinded	Herb	0	0	0	0	0	0	0	0	0	0	0	0	0	0	0	0	0	0	0	0	0	0	0	1	0	0	0	0	0
Kargha	Gilgit	35.915251°	74.257648°	Makhoting	Delphinium brunonianum Royle	Ranunculaceae	leaves, flower	3	Decoction	Herb	0	0	0	0	0	0	0	2	0	0	0	0	0	0	0	0	0	0	0	0	0	0	0	0	0	1	0	0	0
Kargha	Gilgit	35.915251°	74.257648°	Makhoting	Delphinium brunonianum Royle	Ranunculaceae	leaves, flower	1	Decoction	Herb	0	0	0	0	0	0	0	1	0	0	0	0	0	0	0	0	0	0	0	0	0	0	0	0	0	0	0	0	0
Kargha	Gilgit	35.915251°	74.257648°	Makhoting	Delphinium brunonianum Royle	Ranunculaceae	leaves, flower	2	Decoction	Herb	0	0	0	0	0	0	0	1	0	0	0	0	0	0	0	0	0	0	0	0	0	0	0	0	0	1	0	0	0
Kargha	Gilgit	35.915251°	74.257648°	Makhoting	Delphinium brunonianum Royle	Ranunculaceae	leaves, flower	3	Decoction	Herb	0	0	0	0	0	0	0	2	0	0	0	0	0	0	0	0	0	0	0	0	0	0	0	0	0	1	0	0	0
Rahimabad	Gilgit	36.118837°	74.297376°	Makhoting	Delphinium brunonianum Royle	Ranunculaceae	leaves, flower	1	Decoction	Herb	0	0	0	0	0	0	0	1	0	0	0	0	0	0	0	0	0	0	0	0	0	0	0	0	0	0	0	0	0
Rahimabad	Gilgit	36.118837°	74.297376°	Makhoting	Delphinium brunonianum Royle	Ranunculaceae	leaves, flower	1	Decoction	Herb	0	0	0	0	0	0	0	1	0	0	0	0	0	0	0	0	0	0	0	0	0	0	0	0	0	0	0	0	0
Rahimabad	Gilgit	36.118837°	74.297376°	Makhoting	Delphinium brunonianum Royle	Ranunculaceae	leaves, flower	1	Decoction	Herb	0	0	0	0	0	0	0	1	0	0	0	0	0	0	0	0	0	0	0	0	0	0	0	0	0	0	0	0	0
Basho	Skardu	35.469494°	75.359156°	Makhoting	Delphinium brunonianum Royle	Ranunculaceae	whole plant	4	Decoction, powder/grinded, infusion	Herb	0	0	0	0	0	0	0	2	0	0	0	0	0	0	0	0	1	0	0	0	0	0	0	1	0	0	0	0	0
Basho	Skardu	35.469494°	75.359156°	Makhoting	Delphinium brunonianum Royle	Ranunculaceae	aerial parts, seed	4	Decoction, powder/grinded, infusion	Herb	2	0	0	0	0	0	0	1	1	0	0	0	0	0	0	0	0	0	0	0	0	0	0	0	0	0	0	0	0
Basho	Skardu	35.469494°	75.359156°	Makhoting	Delphinium brunonianum Royle	Ranunculaceae	whole plant	4	Decoction, powder/grinded, infusion	Herb	0	0	0	0	0	0	0	2	0	0	0	0	0	0	0	0	1	0	0	0	0	0	0	1	0	0	0	0	0
Basho	Skardu	35.469494°	75.359156°	Makhoting	Delphinium brunonianum Royle	Ranunculaceae	whole plant	4	Decoction, powder/grinded, infusion	Herb	0	0	0	0	0	0	0	2	0	0	0	0	0	0	0	0	1	0	0	0	0	0	0	1	0	0	0	0	0
Hashupi	Skardu	35.485929°	75.696578°	Makhoting	Delphinium brunonianum Royle	Ranunculaceae	whole plant	4	Decoction, powder/grinded, infusion	Herb	0	0	0	0	0	0	0	2	0	0	0	0	0	0	0	0	1	0	0	0	0	0	0	1	0	0	0	0	0
Hashupi	Skardu	35.485929°	75.696578°	Makhoting	Delphinium brunonianum Royle	Ranunculaceae	whole plant	4	Decoction, powder/grinded, infusion	Herb	0	0	0	0	0	0	0	2	0	0	0	0	0	0	0	0	1	0	0	0	0	0	0	1	0	0	0	0	0
Hashupi	Skardu	35.485929°	75.696578°	Makhoting	Delphinium brunonianum Royle	Ranunculaceae	aerial parts, seed	4	Decoction, powder/grinded, infusion	Herb	2	0	0	0	0	0	0	1	1	0	0	0	0	0	0	0	0	0	0	0	0	0	0	0	0	0	0	0	0
Hashupi	Skardu	35.485929°	75.696578°	Makhoting	Delphinium brunonianum Royle	Ranunculaceae	whole plant	4	Decoction, powder/grinded, infusion	Herb	0	0	0	0	0	0	0	2	0	0	0	0	0	0	0	0	1	0	0	0	0	0	0	1	0	0	0	0	0
Hashupi	Skardu	35.485929°	75.696578°	Makhoting	Delphinium brunonianum Royle	Ranunculaceae	aerial parts, seed	4	Decoction, powder/grinded, infusion	Herb	2	0	0	0	0	0	0	1	1	0	0	0	0	0	0	0	0	0	0	0	0	0	0	0	0	0	0	0	0
Hashupi	Skardu	35.485929°	75.696578°	Makhoting	Delphinium brunonianum Royle	Ranunculaceae	aerial parts, seed	4	Decoction, powder/grinded, infusion	Herb	2	0	0	0	0	0	0	1	1	0	0	0	0	0	0	0	0	0	0	0	0	0	0	0	0	0	0	0	0
Hashupi	Skardu	35.485929°	75.696578°	Makhoting	Delphinium brunonianum Royle	Ranunculaceae	aerial parts, seed	4	Decoction, powder/grinded, infusion	Herb	2	0	0	0	0	0	0	1	1	0	0	0	0	0	0	0	0	0	0	0	0	0	0	0	0	0	0	0	0
Hosho	Skardu	35.345214°	75.515283°	Makhoting	Delphinium brunonianum Royle	Ranunculaceae	whole plant	4	Decoction, powder/grinded, infusion	Herb	0	0	0	0	0	0	0	2	0	0	0	0	0	0	0	0	1	0	0	0	0	0	0	1	0	0	0	0	0
Thowar	Skardu	35.609167°	75.203611°	Makhoting	Delphinium brunonianum Royle	Ranunculaceae	aerial parts, seed	4	Decoction, powder/grinded, infusion	Herb	2	0	0	0	0	0	0	1	1	0	0	0	0	0	0	0	0	0	0	0	0	0	0	0	0	0	0	0	0
Thowar	Skardu	35.609167°	75.203611°	Makhoting	Delphinium brunonianum Royle	Ranunculaceae	aerial parts, seed	4	Decoction, powder/grinded, infusion	Herb	2	0	0	0	0	0	0	1	1	0	0	0	0	0	0	0	0	0	0	0	0	0	0	0	0	0	0	0	0
Eidgah	Astore	35.347049°	74.857882°	Khashir	Descurainia sophia (L.) Webb ex Prantl	Brassicaceae	whole plant	1	Decoction, powder/grinded	Herb	0	0	0	0	0	0	0	0	1	0	0	0	0	0	0	0	0	0	0	0	0	0	0	0	0	0	0	0	0
Eidgah	Astore	35.347049°	74.857882°	Khashir	Descurainia sophia (L.) Webb ex Prantl	Brassicaceae	whole plant	2	Decoction, powder/grinded	Herb	0	0	0	0	0	0	0	1	1	0	0	0	0	0	0	0	0	0	0	0	0	0	0	0	0	0	0	0	0
Eidgah	Astore	35.347049°	74.857882°	Khashir	Descurainia sophia (L.) Webb ex Prantl	Brassicaceae	whole plant	2	Decoction, powder/grinded	Herb	0	0	0	0	0	0	0	1	1	0	0	0	0	0	0	0	0	0	0	0	0	0	0	0	0	0	0	0	0
Rattu	Astore	35.168461°	74.791752°1	Khashir	Descurainia sophia (L.) Webb ex Prantl	Brassicaceae	whole plant	1	Decoction, powder/grinded	Herb	0	0	0	0	0	0	0	0	1	0	0	0	0	0	0	0	0	0	0	0	0	0	0	0	0	0	0	0	0
Rattu	Astore	35.168461°	74.791752°1	Khashir	Descurainia sophia (L.) Webb ex Prantl	Brassicaceae	whole plant	2	Decoction, powder/grinded	Herb	0	0	0	0	0	0	0	1	1	0	0	0	0	0	0	0	0	0	0	0	0	0	0	0	0	0	0	0	0
Basho	Skardu	35.469494°	75.359156°	Khashir	Descurainia sophia (L.) Webb ex Prantl	Brassicaceae	whole plant	2	Decoction, powder/grinded	Herb	0	0	0	0	0	0	0	1	1	0	0	0	0	0	0	0	0	0	0	0	0	0	0	0	0	0	0	0	0
Basho	Skardu	35.469494°	75.359156°	Khashir	Descurainia sophia (L.) Webb ex Prantl	Brassicaceae	whole plant	1	Decoction, powder/grinded	Herb	0	0	0	0	0	0	0	0	1	0	0	0	0	0	0	0	0	0	0	0	0	0	0	0	0	0	0	0	0
Hashupi	Skardu	35.485929°	75.696578°	Khashir	Descurainia sophia (L.) Webb ex Prantl	Brassicaceae	whole plant	2	Decoction, powder/grinded	Herb	0	0	0	0	0	0	0	1	1	0	0	0	0	0	0	0	0	0	0	0	0	0	0	0	0	0	0	0	0
Hashupi	Skardu	35.485929°	75.696578°	Khashir	Descurainia sophia (L.) Webb ex Prantl	Brassicaceae	whole plant	1	Decoction, powder/grinded	Herb	0	0	0	0	0	0	0	0	1	0	0	0	0	0	0	0	0	0	0	0	0	0	0	0	0	0	0	0	0
Hashupi	Skardu	35.485929°	75.696578°	Khashir	Descurainia sophia (L.) Webb ex Prantl	Brassicaceae	whole plant	1	Decoction, powder/grinded	Herb	0	0	0	0	0	0	0	0	1	0	0	0	0	0	0	0	0	0	0	0	0	0	0	0	0	0	0	0	0
Hashupi	Skardu	35.485929°	75.696578°	Khashir	Descurainia sophia (L.) Webb ex Prantl	Brassicaceae	whole plant	2	Decoction, powder/grinded	Herb	0	0	0	0	0	0	0	1	1	0	0	0	0	0	0	0	0	0	0	0	0	0	0	0	0	0	0	0	0
Thowar	Skardu	35.609167°	75.203611°	Khashir	Descurainia sophia (L.) Webb ex Prantl	Brassicaceae	whole plant	2	Decoction, powder/grinded	Herb	0	0	0	0	0	0	0	1	1	0	0	0	0	0	0	0	0	0	0	0	0	0	0	0	0	0	0	0	0
Basho	Skardu	35.469494°	75.359156°	Shamdun	Dracocephalum nuristanicum Rech.f. & Edelb.	Apiaceae	Seed	2	Decoction, paste, infusion	Herb	0	0	0	0	0	0	0	2	0	0	0	0	0	0	0	0	0	0	0	0	0	0	0	0	0	0	0	0	0
Basho	Skardu	35.469494°	75.359156°	Shamdun	Dracocephalum nuristanicum Rech.f. & Edelb.	Lamiaceae	seed	1	Decoction, paste, infusion	Herb	0	0	0	0	0	0	0	1	0	0	0	0	0	0	0	0	0	0	0	0	0	0	0	0	0	0	0	0	0
Basho	Skardu	35.469494°	75.359156°	Shamdun	Dracocephalum nuristanicum Rech.f. & Edelb.	Apiaceae	leaves, flower	8	Decoction, paste, infusion	Herb	1	2	0	0	0	0	0	2	1	0	0	0	0	0	0	0	0	0	0	0	0	0	0	0	0	2	0	0	0
Basho	Skardu	35.469494°	75.359156°	Shamdun	Dracocephalum nuristanicum Rech.f. & Edelb.	Apiaceae	Seed	2	Decoction, paste, infusion	Herb	0	0	0	0	0	0	0	2	0	0	0	0	0	0	0	0	0	0	0	0	0	0	0	0	0	0	0	0	0
Basho	Skardu	35.469494°	75.359156°	Shamdun	Dracocephalum nuristanicum Rech.f. & Edelb.	Lamiaceae	seed	1	infusion	Herb	0	0	0	0	0	0	0	1	0	0	0	0	0	0	0	0	0	0	0	0	0	0	0	0	0	0	0	0	0
Basho	Skardu	35.469494°	75.359156°	Shamdun	Dracocephalum nuristanicum Rech.f. & Edelb.	Apiaceae	leaves, flower	8	Decoction, paste, infusion	Herb	1	2	0	0	0	0	0	2	1	0	0	0	0	0	0	0	0	0	0	0	0	0	0	0	0	2	0	0	0
Hashupi	Skardu	35.485929°	75.696578°	Shamdun	Dracocephalum nuristanicum Rech.f. & Edelb.	Apiaceae	Seed	2	Decoction, paste, infusion	Herb	0	0	0	0	0	0	0	2	0	0	0	0	0	0	0	0	0	0	0	0	0	0	0	0	0	0	0	0	0
Hashupi	Skardu	35.485929°	75.696578°	Shamdun	Dracocephalum nuristanicum Rech.f. & Edelb.	Apiaceae	leaves, flower	8	Decoction, paste, infusion	Herb	1	2	0	0	0	0	0	2	1	0	0	0	0	0	0	0	0	0	0	0	0	0	0	0	0	2	0	0	0
Hashupi	Skardu	35.485929°	75.696578°	Shamdun	Dracocephalum nuristanicum Rech.f. & Edelb.	Lamiaceae	seed	1	Decoction, paste	Herb	0	0	0	0	0	0	0	1	0	0	0	0	0	0	0	0	0	0	0	0	0	0	0	0	0	0	0	0	0
Hashupi	Skardu	35.485929°	75.696578°	Shamdun	Dracocephalum nuristanicum Rech.f. & Edelb.	Apiaceae	leaves, flower	8	Decoction, paste	Herb	1	2	0	0	0	0	0	2	1	0	0	0	0	0	0	0	0	0	0	0	0	0	0	0	0	2	0	0	0
Hashupi	Skardu	35.485929°	75.696578°	Shamdun	Dracocephalum nuristanicum Rech.f. & Edelb.	Apiaceae	Seed	2	Decoction, paste	Herb	0	0	0	0	0	0	0	2	0	0	0	0	0	0	0	0	0	0	0	0	0	0	0	0	0	0	0	0	0
Hashupi	Skardu	35.485929°	75.696578°	Shamdun	Dracocephalum nuristanicum Rech.f. & Edelb.	Lamiaceae	seed	1	Decoction, paste	Herb	0	0	0	0	0	0	0	1	0	0	0	0	0	0	0	0	0	0	0	0	0	0	0	0	0	0	0	0	0
Hashupi	Skardu	35.485929°	75.696578°	Shamdun	Dracocephalum nuristanicum Rech.f. & Edelb.	Lamiaceae	seed	1	infusion	Herb	0	0	0	0	0	0	0	1	0	0	0	0	0	0	0	0	0	0	0	0	0	0	0	0	0	0	0	0	0
Hashupi	Skardu	35.485929°	75.696578°	Shamdun	Dracocephalum nuristanicum Rech.f. & Edelb.	Apiaceae	Seed	2	infusion	Herb	0	0	0	0	0	0	0	2	0	0	0	0	0	0	0	0	0	0	0	0	0	0	0	0	0	0	0	0	0
Hashupi	Skardu	35.485929°	75.696578°	Shamdun	Dracocephalum nuristanicum Rech.f. & Edelb.	Apiaceae	leaves, flower	8	Decoction, paste, infusion	Herb	1	2	0	0	0	0	0	2	1	0	0	0	0	0	0	0	0	0	0	0	0	0	0	0	0	2	0	0	0
Hosho	Skardu	35.345214°	75.515283°	Shamdun	Dracocephalum nuristanicum Rech.f. & Edelb.	Apiaceae	leaves, flower	8	Decoction, paste, infusion	Herb	1	2	0	0	0	0	0	2	1	0	0	0	0	0	0	0	0	0	0	0	0	0	0	0	0	2	0	0	0
Hosho	Skardu	35.345214°	75.515283°	Shamdun	Dracocephalum nuristanicum Rech.f. & Edelb.	Apiaceae	Seed	2	Decoction, paste, infusion	Herb	0	0	0	0	0	0	0	2	0	0	0	0	0	0	0	0	0	0	0	0	0	0	0	0	0	0	0	0	0
Thowar	Skardu	35.609167°	75.203611°	Shamdun	Dracocephalum nuristanicum Rech.f. & Edelb.	Lamiaceae	seed	1	Decoction, paste, infusion	Herb	0	0	0	0	0	0	0	1	0	0	0	0	0	0	0	0	0	0	0	0	0	0	0	0	0	0	0	0	0
Thowar	Skardu	35.609167°	75.203611°	Shamdun	Dracocephalum nuristanicum Rech.f. & Edelb.	Apiaceae	Seed	2	Decoction, paste	Herb	0	0	0	0	0	0	0	2	0	0	0	0	0	0	0	0	0	0	0	0	0	0	0	0	0	0	0	0	0
Thowar	Skardu	35.609167°	75.203611°	Shamdun	Dracocephalum nuristanicum Rech.f. & Edelb.	Apiaceae	leaves, flower	8	Decoction, paste, infusion	Herb	1	2	0	0	0	0	0	2	1	0	0	0	0	0	0	0	0	0	0	0	0	0	0	0	0	2	0	0	0
Thowar	Skardu	35.609167°	75.203611°	Shamdun	Dracocephalum nuristanicum Rech.f. & Edelb.	Lamiaceae	seed	1	infusion	Herb	0	0	0	0	0	0	0	1	0	0	0	0	0	0	0	0	0	0	0	0	0	0	0	0	0	0	0	0	0
Bilchar/Bagrote	Gilgit	35.942517°	74.545274°	Khama	Dysphania botrys (L.) Mosyakin & Clemants	Chenopodiaceae	aerial parts	4	Decoction, powder/grinded	Herb	0	0	0	1	0	0	0	2	0	0	0	0	0	0	0	1	0	0	0	0	0	0	0	0	0	0	0	0	0
Bilchar/Bagrote	Gilgit	35.942517°	74.545274°	Khama	Dysphania botrys (L.) Mosyakin & Clemants	Chenopodiaceae	aerial parts	4	Decoction, powder/grinded	Herb	0	0	0	1	0	0	0	2	0	0	0	0	0	0	0	1	0	0	0	0	0	0	0	0	0	0	0	0	0
Bilchar/Bagrote	Gilgit	35.942517°	74.545274°	Khama	Dysphania botrys (L.) Mosyakin & Clemants	Chenopodiaceae	aerial parts	4	Decoction, powder/grinded	Herb	0	0	0	1	0	0	0	2	0	0	0	0	0	0	0	1	0	0	0	0	0	0	0	0	0	0	0	0	0
Danyore	Gilgit	35.919880°	74.386181°	Khama	Dysphania botrys (L.) Mosyakin & Clemants	Chenopodiaceae	aerial parts	4	Decoction, powder/grinded	Herb	0	0	0	1	0	0	0	2	0	0	0	0	0	0	0	1	0	0	0	0	0	0	0	0	0	0	0	0	0
Jalalabad	Gilgit	35.880457°	74.493590°	Khama	Dysphania botrys (L.) Mosyakin & Clemants	Chenopodiaceae	aerial parts	4	Decoction, powder/grinded	Herb	0	0	0	1	0	0	0	2	0	0	0	0	0	0	0	1	0	0	0	0	0	0	0	0	0	0	0	0	0
Jalalabad	Gilgit	35.880457°	74.493590°	Khama	Dysphania botrys (L.) Mosyakin & Clemants	Chenopodiaceae	aerial parts	4	Decoction, powder/grinded	Herb	0	0	0	1	0	0	0	2	0	0	0	0	0	0	0	1	0	0	0	0	0	0	0	0	0	0	0	0	0
Jalalabad	Gilgit	35.880457°	74.493590°	Khama	Dysphania botrys (L.) Mosyakin & Clemants	Chenopodiaceae	aerial parts	4	Decoction, powder/grinded	Herb	0	0	0	1	0	0	0	2	0	0	0	0	0	0	0	1	0	0	0	0	0	0	0	0	0	0	0	0	0
Ghulkin	Hunza	36.407318°	74.863984°	Khord	Dysphania botrys (L.) Mosyakin & Clemants	Chenopodiaceae	whole plant	2	Decoction, powder/grinded	Herb	0	0	0	0	0	0	0	2	0	0	0	0	0	0	0	0	0	0	0	0	0	0	0	0	0	0	0	0	0
Ghulkin	Hunza	36.407318°	74.863984°	Khord	Dysphania botrys (L.) Mosyakin & Clemants	Chenopodiaceae	whole plant	2	Decoction, powder/grinded	Herb	0	0	0	0	0	0	0	2	0	0	0	0	0	0	0	0	0	0	0	0	0	0	0	0	0	0	0	0	0
Ghulkin	Hunza	36.407318°	74.863984°	Khord	Dysphania botrys (L.) Mosyakin & Clemants	Chenopodiaceae	whole plant	2	Decoction, powder/grinded	Herb	0	0	0	0	0	0	0	2	0	0	0	0	0	0	0	0	0	0	0	0	0	0	0	0	0	0	0	0	0
Ghulkin	Hunza	36.407318°	74.863984°	Khord	Dysphania botrys (L.) Mosyakin & Clemants	Chenopodiaceae	whole plant	2	Decoction, powder/grinded	Herb	0	0	0	0	0	0	0	2	0	0	0	0	0	0	0	0	0	0	0	0	0	0	0	0	0	0	0	0	0
Shimshal	Hunza	36.436464°	75.313109°	Khord	Dysphania botrys (L.) Mosyakin & Clemants	Chenopodiaceae	whole plant	2	Decoction, powder/grinded	Herb	0	0	0	0	0	0	0	2	0	0	0	0	0	0	0	0	0	0	0	0	0	0	0	0	0	0	0	0	0
Shimshal	Hunza	36.436464°	75.313109°	Khord	Dysphania botrys (L.) Mosyakin & Clemants	Chenopodiaceae	whole plant	2	Decoction, powder/grinded	Herb	0	0	0	0	0	0	0	2	0	0	0	0	0	0	0	0	0	0	0	0	0	0	0	0	0	0	0	0	0
Shimshal	Hunza	36.436464°	75.313109°	Khord	Dysphania botrys (L.) Mosyakin & Clemants	Chenopodiaceae	whole plant	2	Decoction, powder/grinded	Herb	0	0	0	0	0	0	0	2	0	0	0	0	0	0	0	0	0	0	0	0	0	0	0	0	0	0	0	0	0
Basho	Skardu	35.469494°	75.359156°	Khama	Dysphania botrys (L.) Mosyakin & Clemants	Amaranthaceae	whole plant	2	Decoction, powder/grinded	Herb	0	0	1	1	0	0	0	0	0	0	0	0	0	0	0	0	0	0	0	0	0	0	0	0	0	0	0	0	0
Basho	Skardu	35.469494°	75.359156°	Khama	Dysphania botrys (L.) Mosyakin & Clemants	Amaranthaceae	whole plant	1	Decoction, powder/grinded	Herb	0	0	0	0	0	0	0	1	0	0	0	0	0	0	0	0	0	0	0	0	0	0	0	0	0	0	0	0	0
Basho	Skardu	35.469494°	75.359156°	Khama	Dysphania botrys (L.) Mosyakin & Clemants	Amaranthaceae	whole plant	3	Decoction, powder/grinded	Herb	0	0	1	1	0	0	0	1	0	0	0	0	0	0	0	0	0	0	0	0	0	0	0	0	0	0	0	0	0
Hashupi	Skardu	35.485929°	75.696578°	Khama	Dysphania botrys (L.) Mosyakin & Clemants	Amaranthaceae	whole plant	3	Decoction, powder/grinded	Herb	0	0	1	1	0	0	0	1	0	0	0	0	0	0	0	0	0	0	0	0	0	0	0	0	0	0	0	0	0
Hashupi	Skardu	35.485929°	75.696578°	Khama	Dysphania botrys (L.) Mosyakin & Clemants	Amaranthaceae	whole plant	1	Decoction, powder/grinded	Herb	0	0	1	0	0	0	0	0	0	0	0	0	0	0	0	0	0	0	0	0	0	0	0	0	0	0	0	0	0
Hashupi	Skardu	35.485929°	75.696578°	Khama	Dysphania botrys (L.) Mosyakin & Clemants	Amaranthaceae	whole plant	2	Decoction, powder/grinded	Herb	0	0	0	1	0	0	0	1	0	0	0	0	0	0	0	0	0	0	0	0	0	0	0	0	0	0	0	0	0
Thowar	Skardu	35.609167°	75.203611°	Khama	Dysphania botrys (L.) Mosyakin & Clemants	Amaranthaceae	whole plant	3	Decoction, powder/grinded	Herb	0	0	1	1	0	0	0	1	0	0	0	0	0	0	0	0	0	0	0	0	0	0	0	0	0	0	0	0	0
Gahkuch	Ghizer	36.162949°	73.755492°	Jacheer	Echinops echinatus Roxb.	Compositae	whole plant	2	Decoction, direct	Herb	0	0	0	1	0	0	0	0	0	0	0	0	0	0	0	0	0	0	0	0	0	0	0	0	0	1	0	0	0
Gahkuch	Ghizer	36.162949°	73.755492°	Jacheer	Echinops echinatus Roxb.	Compositae	whole plant	2	Decoction, direct	Herb	0	0	0	1	0	0	0	0	0	0	0	0	0	0	0	0	0	0	0	0	0	0	0	0	0	1	0	0	0
Yaseen	Ghizer	36.369354°	73.332552°	Jacheer	Echinops echinatus Roxb.	Compositae	whole plant	2	Decoction, direct	Herb	0	0	0	1	0	0	0	0	0	0	0	0	0	0	0	0	0	0	0	0	0	0	0	0	0	1	0	0	0
Yaseen	Ghizer	36.369354°	73.332552°	Jacheer	Echinops echinatus Roxb.	Compositae	whole plant	2	Decoction, direct	Herb	0	0	0	1	0	0	0	0	0	0	0	0	0	0	0	0	0	0	0	0	0	0	0	0	0	1	0	0	0
Yaseen	Ghizer	36.369354°	73.332552°	Jacheer	Echinops echinatus Roxb.	Compositae	whole plant	2	Decoction, direct	Herb	0	0	0	1	0	0	0	0	0	0	0	0	0	0	0	0	0	0	0	0	0	0	0	0	0	1	0	0	0
Yaseen	Ghizer	36.369354°	73.332552°	Jacheer	Echinops echinatus Roxb.	Compositae	whole plant	1	Decoction, direct	Herb	0	0	0	0	0	0	0	0	0	0	0	0	0	0	0	0	0	0	0	0	0	0	0	0	0	1	0	0	0
Yaseen	Ghizer	36.369354°	73.332552°	Jacheer	Echinops echinatus Roxb.	Compositae	whole plant	2	Decoction, direct	Herb	0	0	0	1	0	0	0	0	0	0	0	0	0	0	0	0	0	0	0	0	0	0	0	0	0	1	0	0	0
Yaseen	Ghizer	36.369354°	73.332552°	Jacheer	Echinops echinatus Roxb.	Compositae	whole plant	1	Decoction	Herb	0	0	0	0	0	0	0	0	0	0	0	0	0	0	0	0	0	0	0	0	0	0	0	0	0	1	0	0	0
Kargha	Gilgit	35.915251°	74.257648°	Jacheer	Echinops echinatus Roxb.	Compositae	whole plant	1	Direct	Herb	0	0	0	1	0	0	0	0	0	0	0	0	0	0	0	0	0	0	0	0	0	0	0	0	0	0	0	0	0
Kargha	Gilgit	35.915251°	74.257648°	Jacheer	Echinops echinatus Roxb.	Compositae	whole plant	1	Direct	Herb	0	0	0	1	0	0	0	0	0	0	0	0	0	0	0	0	0	0	0	0	0	0	0	0	0	0	0	0	0
Kargha	Gilgit	35.915251°	74.257648°	Jacheer	Echinops echinatus Roxb.	Compositae	whole plant	1	Direct	Herb	0	0	0	1	0	0	0	0	0	0	0	0	0	0	0	0	0	0	0	0	0	0	0	0	0	0	0	0	0
Kargha	Gilgit	35.915251°	74.257648°	Jacheer	Echinops echinatus Roxb.	Compositae	whole plant	1	Direct	Herb	0	0	0	1	0	0	0	0	0	0	0	0	0	0	0	0	0	0	0	0	0	0	0	0	0	0	0	0	0
Kargha	Gilgit	35.915251°	74.257648°	Jacheer	Echinops echinatus Roxb.	Compositae	whole plant	1	Direct	Herb	0	0	0	1	0	0	0	0	0	0	0	0	0	0	0	0	0	0	0	0	0	0	0	0	0	0	0	0	0
Rahimabad	Gilgit	36.118837°	74.297376°	Jacheer	Echinops echinatus Roxb.	Compositae	whole plant	1	Direct	Herb	0	0	0	1	0	0	0	0	0	0	0	0	0	0	0	0	0	0	0	0	0	0	0	0	0	0	0	0	0
Rahimabad	Gilgit	36.118837°	74.297376°	Jacheer	Echinops echinatus Roxb.	Compositae	whole plant	1	Direct	Herb	0	0	0	1	0	0	0	0	0	0	0	0	0	0	0	0	0	0	0	0	0	0	0	0	0	0	0	0	0
Aliabad	Hunza	36.308563°	74.619496°	Jacheer	Echinops echinatus Roxb.	Compositae	whole plant	2	Decoction	Herb	0	0	0	2	0	0	0	0	0	0	0	0	0	0	0	0	0	0	0	0	0	0	0	0	0	0	0	0	0
Aliabad	Hunza	36.308563°	74.619496°	Jacheer	Echinops echinatus Roxb.	Compositae	whole plant	2	Decoction	Herb	0	0	0	2	0	0	0	0	0	0	0	0	0	0	0	0	0	0	0	0	0	0	0	0	0	0	0	0	0
Aliabad	Hunza	36.308563°	74.619496°	Jacheer	Echinops echinatus Roxb.	Compositae	whole plant	2	Direct	Herb	0	0	0	2	0	0	0	0	0	0	0	0	0	0	0	0	0	0	0	0	0	0	0	0	0	0	0	0	0
Aliabad	Hunza	36.308563°	74.619496°	Jacheer	Echinops echinatus Roxb.	Compositae	whole plant	2	Direct	Herb	0	0	0	2	0	0	0	0	0	0	0	0	0	0	0	0	0	0	0	0	0	0	0	0	0	0	0	0	0
Aliabad	Hunza	36.308563°	74.619496°	Jacheer	Echinops echinatus Roxb.	Compositae	whole plant	2	Direct	Herb	0	0	0	2	0	0	0	0	0	0	0	0	0	0	0	0	0	0	0	0	0	0	0	0	0	0	0	0	0
Aliabad	Hunza	36.308563°	74.619496°	Jacheer	Echinops echinatus Roxb.	Compositae	whole plant	2	Direct	Herb	0	0	0	2	0	0	0	0	0	0	0	0	0	0	0	0	0	0	0	0	0	0	0	0	0	0	0	0	0
Murtazaabad	Hunza	36.285517°	74.607833°	Jacheer	Echinops echinatus Roxb.	Compositae	whole plant	2	Decoction	Herb	0	0	0	2	0	0	0	0	0	0	0	0	0	0	0	0	0	0	0	0	0	0	0	0	0	0	0	0	0
Ghulmit	Nagar	36.241766°	74.462110°	Jacheer	Echinops echinatus Roxb.	Compositae	whole plant	3	decoction, direct	Herb	0	0	0	2	0	0	0	1	0	0	0	0	0	0	0	0	0	0	0	0	0	0	0	0	0	0	0	0	0
Ghulmit	Nagar	36.241766°	74.462110°	Jacheer	Echinops echinatus Roxb.	Compositae	whole plant	2	Decoction	Herb	0	0	0	2	0	0	0	0	0	0	0	0	0	0	0	0	0	0	0	0	0	0	0	0	0	0	0	0	0
Ghulmit	Nagar	36.241766°	74.462110°	Jacheer	Echinops echinatus Roxb.	Compositae	whole plant	2	Decoction	Herb	0	0	0	1	0	0	0	1	0	0	0	0	0	0	0	0	0	0	0	0	0	0	0	0	0	0	0	0	0
Ghulmit	Nagar	36.241766°	74.462110°	Jacheer	Echinops echinatus Roxb.	Compositae	whole plant	3	decoction, direct	Herb	0	0	0	2	0	0	0	1	0	0	0	0	0	0	0	0	0	0	0	0	0	0	0	0	0	0	0	0	0
Hopar	Nagar	36.225179°	74.754189°	Jacheer	Echinops echinatus Roxb.	Compositae	whole plant	5	decoction, direct	Herb	0	0	0	4	0	0	0	1	0	0	0	0	0	0	0	0	0	0	0	0	0	0	0	0	0	0	0	0	0
Minapin	Nagar	36.250922°	74.536075°	Jacheer	Echinops echinatus Roxb.	Compositae	whole plant	3	Decoction	Herb	0	0	0	2	0	0	0	1	0	0	0	0	0	0	0	0	0	0	0	0	0	0	0	0	0	0	0	0	0
Minapin	Nagar	36.250922°	74.536075°	Jacheer	Echinops echinatus Roxb.	Compositae	whole plant	4	Decoction	Herb	0	0	0	3	0	0	0	1	0	0	0	0	0	0	0	0	0	0	0	0	0	0	0	0	0	0	0	0	0
Minapin	Nagar	36.250922°	74.536075°	Jacheer	Echinops echinatus Roxb.	Compositae	whole plant	5	decoction, direct	Herb	0	0	0	4	0	0	0	1	0	0	0	0	0	0	0	0	0	0	0	0	0	0	0	0	0	0	0	0	0
Nagar Khas	Nagar	36.276377°	74.719955°	Jacheer	Echinops echinatus Roxb.	Compositae	whole plant	3	Decoction	Herb	0	0	0	2	0	0	0	1	0	0	0	0	0	0	0	0	0	0	0	0	0	0	0	0	0	0	0	0	0
Nagar Khas	Nagar	36.276377°	74.719955°	Jacheer	Echinops echinatus Roxb.	Compositae	whole plant	4	Decoction	Herb	0	0	0	4	0	0	0	0	0	0	0	0	0	0	0	0	0	0	0	0	0	0	0	0	0	0	0	0	0
Nagar Khas	Nagar	36.276377°	74.719955°	Jacheer	Echinops echinatus Roxb.	Compositae	whole plant	4	Decoction	Herb	0	0	0	3	0	0	0	1	0	0	0	0	0	0	0	0	0	0	0	0	0	0	0	0	0	0	0	0	0
Nagar Khas	Nagar	36.276377°	74.719955°	Jacheer	Echinops echinatus Roxb.	Compositae	whole plant	4	Decoction	Herb	0	0	0	4	0	0	0	0	0	0	0	0	0	0	0	0	0	0	0	0	0	0	0	0	0	0	0	0	0
Nagar Khas	Nagar	36.276377°	74.719955°	Jacheer	Echinops echinatus Roxb.	Compositae	whole plant	5	Decoction, direct	Herb	0	0	0	4	0	0	0	1	0	0	0	0	0	0	0	0	0	0	0	0	0	0	0	0	0	0	0	0	0
Nagar Khas	Nagar	36.276377°	74.719955°	Jacheer	Echinops echinatus Roxb.	Compositae	whole plant	3	decoction, direct	Herb	0	0	0	2	0	0	0	1	0	0	0	0	0	0	0	0	0	0	0	0	0	0	0	0	0	0	0	0	0
Phekar	Nagar	36.263297°	74.594568°	Jacheer	Echinops echinatus Roxb.	Compositae	whole plant	5	Decoction, direct	Herb	0	0	0	4	0	0	0	1	0	0	0	0	0	0	0	0	0	0	0	0	0	0	0	0	0	0	0	0	0
Phekar	Nagar	36.263297°	74.594568°	Jacheer	Echinops echinatus Roxb.	Compositae	whole plant	3	Decoction	Herb	0	0	0	2	0	0	0	1	0	0	0	0	0	0	0	0	0	0	0	0	0	0	0	0	0	0	0	0	0
Phekar	Nagar	36.263297°	74.594568°	Jacheer	Echinops echinatus Roxb.	Compositae	whole plant	5	decoction, direct	Herb	0	0	0	4	0	0	0	1	0	0	0	0	0	0	0	0	0	0	0	0	0	0	0	0	0	0	0	0	0
Gahkuch	Ghizer	36.162949°	73.755492°	Ghundair	Elaeagnus angustifolia L.	Eleagnaceae	fruit	5	Decoction, powder/grinded	Tree	0	0	0	0	0	0	0	0	1	0	0	0	0	0	0	0	3	0	1	0	0	0	0	0	0	0	0	0	0
Gahkuch	Ghizer	36.162949°	73.755492°	Ghundair	Elaeagnus angustifolia L.	Eleagnaceae	flower, fruit, gum	3	Decoction, powder/grinded	Tree	0	0	0	0	0	0	0	0	1	0	0	0	0	0	0	0	1	0	1	0	0	0	0	0	0	0	0	0	0
Gahkuch	Ghizer	36.162949°	73.755492°	Ghundair	Elaeagnus angustifolia L.	Eleagnaceae	fruit	2	Decoction, powder/grinded	Tree	0	0	0	0	0	0	0	0	1	0	0	0	0	0	0	0	1	0	0	0	0	0	0	0	0	0	0	0	0
Gahkuch	Ghizer	36.162949°	73.755492°	Ghundair	Elaeagnus angustifolia L.	Eleagnaceae	flower, fruit, gum	6	Direct, powder/grinded, decoction	Tree	0	0	0	0	0	0	0	0	2	0	0	0	0	0	0	0	3	0	1	0	0	0	0	0	0	0	0	0	0
Gahkuch	Ghizer	36.162949°	73.755492°	Ghundair	Elaeagnus angustifolia L.	Eleagnaceae	flower, fruit, gum	2	Direct, powder/grinded, decoction	Tree	0	0	0	0	0	0	0	0	0	0	0	0	0	0	0	0	2	0	0	0	0	0	0	0	0	0	0	0	0
Gahkuch	Ghizer	36.162949°	73.755492°	Ghundair	Elaeagnus angustifolia L.	Eleagnaceae	flower, fruit, gum	5	Direct, powder/grinded, decoction	Tree	0	0	0	0	0	0	0	0	2	0	0	0	0	0	0	0	3	0	0	0	0	0	0	0	0	0	0	0	0
Gahkuch	Ghizer	36.162949°	73.755492°	Ghundair	Elaeagnus angustifolia L.	Eleagnaceae	fruit	3	Direct, powder/grinded, decoction	Tree	0	0	0	0	0	0	0	0	2	0	0	0	0	0	0	0	1	0	0	0	0	0	0	0	0	0	0	0	0
Gahkuch	Ghizer	36.162949°	73.755492°	Ghundair	Elaeagnus angustifolia L.	Eleagnaceae	flower, fruit, gum	2	Decoction, powder/grinded	Tree	0	0	0	0	0	0	0	0	2	0	0	0	0	0	0	0	0	0	0	0	0	0	0	0	0	0	0	0	0
Yaseen	Ghizer	36.369354°	73.332552°	Ghundair	Elaeagnus angustifolia L.	Eleagnaceae	fruit	4	Direct, powder/grinded, decoction	Tree	0	0	0	0	0	0	0	0	0	0	0	0	0	0	0	0	3	0	1	0	0	0	0	0	0	0	0	0	0
Yaseen	Ghizer	36.369354°	73.332552°	Ghundair	Elaeagnus angustifolia L.	Eleagnaceae	flower, fruit, gum	2	Direct, powder/grinded, decoction	Tree	0	0	0	0	0	0	0	0	0	0	0	0	0	0	0	0	1	0	1	0	0	0	0	0	0	0	0	0	0
Yaseen	Ghizer	36.369354°	73.332552°	Ghundair	Elaeagnus angustifolia L.	Eleagnaceae	fruit	4	Decoction, powder/grinded	Tree	0	0	0	0	0	0	0	0	0	0	0	0	0	0	0	0	3	0	1	0	0	0	0	0	0	0	0	0	0
Yaseen	Ghizer	36.369354°	73.332552°	Ghundair	Elaeagnus angustifolia L.	Eleagnaceae	flower, fruit, gum	6	Direct, powder/grinded, decoction	Tree	0	0	0	0	0	0	0	0	2	0	0	0	0	0	0	0	3	0	1	0	0	0	0	0	0	0	0	0	0
Yaseen	Ghizer	36.369354°	73.332552°	Ghundair	Elaeagnus angustifolia L.	Eleagnaceae	fruit	2	Decoction, powder/grinded	Tree	0	0	0	0	0	0	0	0	2	0	0	0	0	0	0	0	0	0	0	0	0	0	0	0	0	0	0	0	0
Yaseen	Ghizer	36.369354°	73.332552°	Ghundair	Elaeagnus angustifolia L.	Eleagnaceae	fruit	4	Direct, powder/grinded, decoction	Tree	0	0	0	0	0	0	0	0	2	0	0	0	0	0	0	0	2	0	0	0	0	0	0	0	0	0	0	0	0
Yaseen	Ghizer	36.369354°	73.332552°	Ghundair	Elaeagnus angustifolia L.	Eleagnaceae	fruit	3	Decoction, powder/grinded	Tree	0	0	0	0	0	0	0	0	2	0	0	0	0	0	0	0	1	0	0	0	0	0	0	0	0	0	0	0	0
Bilchar/Bagrote	Gilgit	35.942517°	74.545274°	Ghonair	Elaeagnus angustifolia L.	Eleagnaceae	fruit, root, leaves	4	Decoction, powder/grinded	Tree	0	0	0	0	0	0	0	1	0	0	0	0	0	2	0	1	0	0	0	0	0	0	0	0	0	0	0	0	0
Bilchar/Bagrote	Gilgit	35.942517°	74.545274°	Ghonair	Elaeagnus angustifolia L.	Eleagnaceae	fruit, root, leaves	1	Decoction, powder/grinded	Tree	0	0	0	0	0	0	0	1	0	0	0	0	0	0	0	0	0	0	0	0	0	0	0	0	0	0	0	0	0
Bilchar/Bagrote	Gilgit	35.942517°	74.545274°	Ghonair	Elaeagnus angustifolia L.	Eleagnaceae	fruit, root, leaves	5	Decoction, powder/grinded	Tree	0	0	0	0	0	0	0	1	0	0	0	0	0	2	0	1	0	0	0	0	0	0	0	0	0	1	0	0	0
Bilchar/Bagrote	Gilgit	35.942517°	74.545274°	Ghonair	Elaeagnus angustifolia L.	Eleagnaceae	fruit, root, leaves	5	Decoction, powder/grinded	Tree	0	0	0	0	0	0	0	1	0	0	0	0	0	2	0	1	0	0	0	0	0	0	0	0	0	1	0	0	0
Bilchar/Bagrote	Gilgit	35.942517°	74.545274°	Ghonair	Elaeagnus angustifolia L.	Eleagnaceae	fruit, root, leaves	5	Decoction, powder/grinded	Tree	0	0	0	0	0	0	0	1	0	0	0	0	0	2	0	1	0	0	0	0	0	0	0	0	0	1	0	0	0
Danyore	Gilgit	35.919880°	74.386181°	Ghonair	Elaeagnus angustifolia L.	Eleagnaceae	fruit, root, leaves	4	Decoction, powder/grinded	Tree	0	0	0	0	0	0	0	1	0	0	0	0	0	2	0	1	0	0	0	0	0	0	0	0	0	0	0	0	0
Danyore	Gilgit	35.919880°	74.386181°	Ghonair	Elaeagnus angustifolia L.	Eleagnaceae	fruit, root, leaves	4	Decoction, powder/grinded	Tree	0	0	0	0	0	0	0	1	0	0	0	0	0	2	0	1	0	0	0	0	0	0	0	0	0	0	0	0	0
Danyore	Gilgit	35.919880°	74.386181°	Ghonair	Elaeagnus angustifolia L.	Eleagnaceae	fruit, root, leaves	3	Decoction, powder/grinded	Tree	0	0	0	0	0	0	0	1	0	0	0	0	0	1	0	1	0	0	0	0	0	0	0	0	0	0	0	0	0
Jalalabad	Gilgit	35.880457°	74.493590°	Ghonair	Elaeagnus angustifolia L.	Eleagnaceae	fruit, root, leaves	4	Decoction, powder/grinded	Tree	0	0	0	0	0	0	0	1	0	0	0	0	0	2	0	1	0	0	0	0	0	0	0	0	0	0	0	0	0
Jalalabad	Gilgit	35.880457°	74.493590°	Ghonair	Elaeagnus angustifolia L.	Eleagnaceae	fruit, root, leaves	1	Decoction, powder/grinded	Tree	0	0	0	0	0	0	0	1	0	0	0	0	0	0	0	0	0	0	0	0	0	0	0	0	0	0	0	0	0
Jalalabad	Gilgit	35.880457°	74.493590°	Ghonair	Elaeagnus angustifolia L.	Eleagnaceae	fruit, root, leaves	5	Decoction, powder/grinded	Tree	0	0	0	0	0	0	0	1	0	0	0	0	0	2	0	1	0	0	0	0	0	0	0	0	0	1	0	0	0
Jalalabad	Gilgit	35.880457°	74.493590°	Ghonair	Elaeagnus angustifolia L.	Eleagnaceae	fruit, root, leaves	5	Decoction, powder/grinded	Tree	0	0	0	0	0	0	0	1	0	0	0	0	0	2	0	1	0	0	0	0	0	0	0	0	0	1	0	0	0
Jalalabad	Gilgit	35.880457°	74.493590°	Ghonair	Elaeagnus angustifolia L.	Eleagnaceae	fruit, root, leaves	5	Decoction, powder/grinded	Tree	0	0	0	0	0	0	0	1	0	0	0	0	0	2	0	1	0	0	0	0	0	0	0	0	0	1	0	0	0
Kargha	Gilgit	35.915251°	74.257648°	Ghindawar	Elaeagnus angustifolia L.	Eleagnaceae	whole plant	5	Decoction, direct	Tree	0	0	0	0	0	0	0	0	2	0	0	0	0	0	0	0	3	0	0	0	0	0	0	0	0	0	0	0	0
Kargha	Gilgit	35.915251°	74.257648°	Ghindawar	Elaeagnus angustifolia L.	Eleagnaceae	whole plant	2	Decoction, direct	Tree	0	0	0	0	0	0	0	0	1	0	0	0	0	0	0	0	1	0	0	0	0	0	0	0	0	0	0	0	0
Kargha	Gilgit	35.915251°	74.257648°	Ghindawar	Elaeagnus angustifolia L.	Eleagnaceae	whole plant	3	Decoction, direct	Tree	0	0	0	0	0	0	0	0	1	0	0	0	0	0	0	0	2	0	0	0	0	0	0	0	0	0	0	0	0
Kargha	Gilgit	35.915251°	74.257648°	Ghindawar	Elaeagnus angustifolia L.	Eleagnaceae	whole plant	2	Decoction, direct	Tree	0	0	0	0	0	0	0	0	2	0	0	0	0	0	0	0	0	0	0	0	0	0	0	0	0	0	0	0	0
Kargha	Gilgit	35.915251°	74.257648°	Ghindawar	Elaeagnus angustifolia L.	Eleagnaceae	whole plant	3	Decoction, direct	Tree	0	0	0	0	0	0	0	0	0	0	0	0	0	0	0	0	3	0	0	0	0	0	0	0	0	0	0	0	0
Kargha	Gilgit	35.915251°	74.257648°	Ghindawar	Elaeagnus angustifolia L.	Eleagnaceae	whole plant	4	Decoction, direct	Tree	0	0	0	0	0	0	0	0	1	0	0	0	0	0	0	0	3	0	0	0	0	0	0	0	0	0	0	0	0
Rahimabad	Gilgit	36.118837°	74.297376°	Ghindawar	Elaeagnus angustifolia L.	Eleagnaceae	whole plant	5	Decoction, direct	Tree	0	0	0	0	0	0	0	0	2	0	0	0	0	0	0	0	3	0	0	0	0	0	0	0	0	0	0	0	0
Aliabad	Hunza	36.308563°	74.619496°	Gindawar	Elaeagnus angustifolia L.	Eleagnaceae	petal and gum	3	Decoction, powder/grinded	Tree	0	0	0	0	0	0	0	0	0	0	0	0	0	0	0	0	1	1	0	0	0	0	0	1	0	0	0	0	0
Aliabad	Hunza	36.308563°	74.619496°	Gindawar	Elaeagnus angustifolia L.	Eleagnaceae	seed	3	Decoction, powder/grinded	Tree	0	0	0	0	0	0	0	0	1	0	0	0	0	0	0	0	0	1	0	0	0	0	0	1	0	0	0	0	0
Aliabad	Hunza	36.308563°	74.619496°	Gindawar	Elaeagnus angustifolia L.	Eleagnaceae	leaves	2	Decoction, powder/grinded	Tree	0	0	0	0	0	0	0	0	0	0	0	0	0	0	0	0	0	1	0	0	0	0	0	1	0	0	0	0	0
Altit	Hunza	36.316102°	74.681835°	Gindawar	Elaeagnus angustifolia L.	Eleagnaceae	leaves	4	Direct, powder/grinded, decoction	Tree	0	0	0	0	0	0	0	0	1	0	0	0	0	0	0	0	1	1	0	0	0	0	0	1	0	0	0	0	0
Altit	Hunza	36.316102°	74.681835°	Gindawar	Elaeagnus angustifolia L.	Eleagnaceae	seed	2	Decoction, powder/grinded	Tree	0	0	0	0	0	0	0	0	1	0	0	0	0	0	0	0	0	0	0	0	0	0	0	1	0	0	0	0	0
Altit	Hunza	36.316102°	74.681835°	Gindawar	Elaeagnus angustifolia L.	Eleagnaceae	leaves	1	Decoction, powder/grinded	Tree	0	0	0	0	0	0	0	0	0	0	0	0	0	0	0	0	0	0	0	0	0	0	0	1	0	0	0	0	0
Altit	Hunza	36.316102°	74.681835°	Gindawar	Elaeagnus angustifolia L.	Eleagnaceae	Fruit, gum	2	Decoction, powder/grinded	Tree	0	0	0	0	0	0	0	0	1	0	0	0	0	0	0	0	1	0	0	0	0	0	0	0	0	0	0	0	0
Altit	Hunza	36.316102°	74.681835°	Gindawar	Elaeagnus angustifolia L.	Eleagnaceae	seed	3	Decoction, powder/grinded	Tree	0	0	0	0	0	0	0	0	0	0	0	0	0	0	0	0	1	1	0	0	0	0	0	1	0	0	0	0	0
Altit	Hunza	36.316102°	74.681835°	Gindawar	Elaeagnus angustifolia L.	Eleagnaceae	Fruit, gum	2	Decoction, powder/grinded	Tree	0	0	0	0	0	0	0	0	1	0	0	0	0	0	0	0	1	0	0	0	0	0	0	0	0	0	0	0	0
Ghulkin	Hunza	36.407318°	74.863984°	Sisk	Elaeagnus angustifolia L.	Elaeagnaceae	Fruit, gum	3	Decoction, powder/grinded	Tree	0	0	0	0	0	0	0	0	0	0	1	0	0	0	0	0	0	0	0	0	0	0	0	2	0	0	0	0	0
Ghulkin	Hunza	36.407318°	74.863984°	Sisk	Elaeagnus angustifolia L.	Elaeagnaceae	Fruit, gum	3	Decoction, powder/grinded	Tree	0	0	0	0	0	0	0	0	0	0	1	0	0	0	0	0	0	0	0	0	0	0	0	2	0	0	0	0	0
Ghulkin	Hunza	36.407318°	74.863984°	Sisk	Elaeagnus angustifolia L.	Elaeagnaceae	Fruit, gum	3	Decoction, powder/grinded	Tree	0	0	0	0	0	0	0	0	0	0	1	0	0	0	0	0	0	0	0	0	0	0	0	2	0	0	0	0	0
Ghulkin	Hunza	36.407318°	74.863984°	Sisk	Elaeagnus angustifolia L.	Elaeagnaceae	Fruit, gum	2	Decoction, powder/grinded	Tree	0	0	0	0	0	0	0	0	0	0	0	0	0	0	0	0	0	0	0	0	0	0	0	2	0	0	0	0	0
Ghulkin	Hunza	36.407318°	74.863984°	Sisk	Elaeagnus angustifolia L.	Elaeagnaceae	Fruit, gum	2	Decoction, powder/grinded	Tree	0	0	0	0	0	0	0	0	0	0	0	0	0	0	0	0	0	0	0	0	0	0	0	2	0	0	0	0	0
Karimabad	Hunza	36.326408°	74.664316°	Gindawar	Elaeagnus angustifolia L.	Eleagnaceae	seed	3	Direct, powder/grinded, decoction	Tree	0	0	0	0	0	0	0	0	0	0	0	0	0	0	0	0	1	1	0	0	0	0	0	1	0	0	0	0	0
Karimabad	Hunza	36.326408°	74.664316°	Gindawar	Elaeagnus angustifolia L.	Eleagnaceae	Fruit, gum	2	Direct, powder/grinded, decoction	Tree	0	0	0	0	0	0	0	0	1	0	0	0	0	0	0	0	1	0	0	0	0	0	0	0	0	0	0	0	0
Karimabad	Hunza	36.326408°	74.664316°	Gindawar	Elaeagnus angustifolia L.	Eleagnaceae	petal and gum	2	Decoction, powder/grinded	Tree	0	0	0	0	0	0	0	0	0	0	0	0	0	0	0	0	1	0	0	0	0	0	0	1	0	0	0	0	0
Karimabad	Hunza	36.326408°	74.664316°	Gindawar	Elaeagnus angustifolia L.	Eleagnaceae	whole plant	3	Direct, powder/grinded, decoction	Tree	0	0	0	0	0	0	0	0	1	0	0	0	0	0	0	0	0	1	0	0	0	0	0	1	0	0	0	0	0
Murtazaabad	Hunza	36.285517°	74.607833°	Gindawar	Elaeagnus angustifolia L.	Eleagnaceae	whole plant	4	Direct, powder/grinded, decoction	Tree	0	0	0	0	0	0	0	0	1	0	0	0	0	0	0	0	1	1	0	0	0	0	0	1	0	0	0	0	0
Murtazaabad	Hunza	36.285517°	74.607833°	Gindawar	Elaeagnus angustifolia L.	Eleagnaceae	whole plant	1	Decoction, powder/grinded	Tree	0	0	0	0	0	0	0	0	0	0	0	0	0	0	0	0	0	0	0	0	0	0	0	1	0	0	0	0	0
Murtazaabad	Hunza	36.285517°	74.607833°	Gindawar	Elaeagnus angustifolia L.	Eleagnaceae	petal and gum	3	Decoction, powder/grinded	Tree	0	0	0	0	0	0	0	0	0	0	0	0	0	0	0	0	1	1	0	0	0	0	0	1	0	0	0	0	0
Murtazaabad	Hunza	36.285517°	74.607833°	Gindawar	Elaeagnus angustifolia L.	Eleagnaceae	leaves	4	Direct, powder/grinded, decoction	Tree	0	0	0	0	0	0	0	0	1	0	0	0	0	0	0	0	1	1	0	0	0	0	0	1	0	0	0	0	0
Murtazaabad	Hunza	36.285517°	74.607833°	Gindawar	Elaeagnus angustifolia L.	Eleagnaceae	petal and gum	2	Decoction, powder/grinded	Tree	0	0	0	0	0	0	0	0	0	0	0	0	0	0	0	0	1	0	0	0	0	0	0	1	0	0	0	0	0
Shimshal	Hunza	36.436464°	75.313109°	Sisk	Elaeagnus angustifolia L.	Elaeagnaceae	Fruit, gum	3	Decoction, powder/grinded	Tree	0	0	0	0	0	0	0	0	0	0	1	0	0	0	0	0	0	0	0	0	0	0	0	2	0	0	0	0	0
Shimshal	Hunza	36.436464°	75.313109°	Sisk	Elaeagnus angustifolia L.	Elaeagnaceae	Fruit, gum	2	Decoction, powder/grinded	Tree	0	0	0	0	0	0	0	0	0	0	0	0	0	0	0	0	0	0	0	0	0	0	0	2	0	0	0	0	0
Ghulmit	Nagar	36.241766°	74.462110°	Shekarkuch	Elaeagnus angustifolia L.	Eleagnaceae	fruit, root, leaves	6	Direct, powder/grinded, decoction	Tree	0	0	0	0	0	0	0	1	1	0	0	0	0	2	0	1	0	0	0	0	0	0	0	0	0	1	0	0	0
Ghulmit	Nagar	36.241766°	74.462110°	Shekarkuch	Elaeagnus angustifolia L.	Eleagnaceae	seed	9	Direct, powder/grinded, decoction	Tree	0	0	0	0	0	0	0	1	1	0	1	0	0	2	0	1	1	1	0	0	0	0	0	1	0	0	0	0	0
Ghulmit	Nagar	36.241766°	74.462110°	Shekarkuch	Elaeagnus angustifolia L.	Eleagnaceae	flower, fruit, gum	8	Direct, powder/grinded, decoction	Tree	0	0	0	0	0	0	0	0	2	0	0	0	0	1	0	0	3	1	1	0	0	0	0	0	0	0	0	0	0
Ghulmit	Nagar	36.241766°	74.462110°	Shekarkuch	Elaeagnus angustifolia L.	Eleagnaceae	fruit, root, leaves	6	Direct, powder/grinded, decoction	Tree	0	0	0	0	0	0	0	1	1	0	0	0	0	2	0	1	0	0	0	0	0	0	0	0	0	1	0	0	0
Minapin	Nagar	36.250922°	74.536075°	Shekarkuch	Elaeagnus angustifolia L.	Eleagnaceae	fruit, root, leaves	8	Direct, powder/grinded, decoction	Tree	0	0	0	0	0	0	0	1	1	0	0	0	0	2	0	1	2	0	0	0	0	0	0	0	0	1	0	0	0
Minapin	Nagar	36.250922°	74.536075°	Shekarkuch	Elaeagnus angustifolia L.	Eleagnaceae	leaves	9	Direct, powder/grinded, decoction	Tree	0	0	0	0	0	0	0	0	2	0	1	0	0	0	0	1	3	1	0	0	0	0	0	1	0	0	0	0	0
Minapin	Nagar	36.250922°	74.536075°	Shekarkuch	Elaeagnus angustifolia L.	Eleagnaceae	fruit	10	Direct, powder/grinded, decoction	Tree	0	0	0	0	0	0	0	1	2	0	1	0	0	2	0	1	3	0	0	0	0	0	0	0	0	0	0	0	0
Minapin	Nagar	36.250922°	74.536075°	Shekarkuch	Elaeagnus angustifolia L.	Eleagnaceae	fruit, root, leaves	8	Direct, powder/grinded, decoction	Tree	0	0	0	0	0	0	0	1	1	0	1	0	0	2	0	1	1	0	0	0	0	0	0	0	0	1	0	0	0
Nagar Khas	Nagar	36.276377°	74.719955°	Shekarkuch	Elaeagnus angustifolia L.	Eleagnaceae	whole plant	8	Direct, powder/grinded, decoction	Tree	0	0	0	0	0	0	0	0	2	0	1	0	0	2	0	0	3	0	0	0	0	0	0	0	0	0	0	0	0
Nagar Khas	Nagar	36.276377°	74.719955°	Shekarkuch	Elaeagnus angustifolia L.	Eleagnaceae	petal and gum	9	Direct, powder/grinded, decoction	Tree	0	0	0	0	0	0	0	1	1	0	1	0	0	2	0	0	1	1	0	0	0	0	0	1	0	1	0	0	0
Nagar Khas	Nagar	36.276377°	74.719955°	Shekarkuch	Elaeagnus angustifolia L.	Eleagnaceae	Fruit, gum	9	Direct, powder/grinded, decoction	Tree	0	0	0	0	0	0	0	1	2	0	0	0	0	2	0	1	2	0	0	0	0	0	0	0	0	1	0	0	0
Nagar Khas	Nagar	36.276377°	74.719955°	Shekarkuch	Elaeagnus angustifolia L.	Eleagnaceae	whole plant	8	Direct, powder/grinded, decoction	Tree	0	0	0	0	0	0	0	1	2	0	1	0	0	1	0	0	2	0	0	0	0	0	0	0	0	1	0	0	0
Nagar Khas	Nagar	36.276377°	74.719955°	Shekarkuch	Elaeagnus angustifolia L.	Elaeagnaceae	Fruit, gum	10	Direct, powder/grinded, decoction	Tree	0	0	0	0	0	0	0	0	2	0	1	0	0	0	0	0	3	1	0	0	0	0	0	2	0	1	0	0	0
Phekar	Nagar	36.263297°	74.594568°	Shekarkuch	Elaeagnus angustifolia L.	Eleagnaceae	fruit	10	Direct, powder/grinded, decoction	Tree	0	0	0	0	0	0	0	1	2	0	1	0	0	0	0	1	3	1	0	0	0	0	0	0	0	1	0	0	0
Phekar	Nagar	36.263297°	74.594568°	Shekarkuch	Elaeagnus angustifolia L.	Elaeagnaceae	Fruit, gum	9	Direct, powder/grinded, decoction	Tree	0	0	0	0	0	0	0	1	1	0	1	0	0	1	0	1	2	0	0	0	0	0	0	2	0	0	0	0	0
Phekar	Nagar	36.263297°	74.594568°	Shekarkuch	Elaeagnus angustifolia L.	Eleagnaceae	whole plant	9	Direct, powder/grinded, decoction	Tree	0	0	0	0	0	0	0	0	2	0	0	0	0	2	0	0	2	1	0	0	0	0	0	1	0	1	0	0	0
Eidgah	Astore	35.347049°	74.857882°	Karsoq	Elaeagnus rhamnoides (L.) A.Nelson	Elaeagnaceae	fruit, leaves	1	Direct, decoction	Shrub	0	0	0	0	0	0	0	1	0	0	0	0	0	0	0	0	0	0	0	0	0	0	0	0	0	0	0	0	0
Gorikot	Astore	35.281969°	74.841940°	Karsoq	Elaeagnus rhamnoides (L.) A.Nelson	Elaeagnaceae	fruit, leaves	2	Direct, decoction	Shrub	0	1	0	0	0	0	0	1	0	0	0	0	0	0	0	0	0	0	0	0	0	0	0	0	0	0	0	0	0
Gorikot	Astore	35.281969°	74.841940°	Karsoq	Elaeagnus rhamnoides (L.) A.Nelson	Elaeagnaceae	fruit, leaves	1	Direct, decoction	Shrub	0	1	0	0	0	0	0	0	0	0	0	0	0	0	0	0	0	0	0	0	0	0	0	0	0	0	0	0	0
Gorikot	Astore	35.281969°	74.841940°	Karsoq	Elaeagnus rhamnoides (L.) A.Nelson	Elaeagnaceae	fruit, leaves	1	Direct, decoction	Shrub	0	1	0	0	0	0	0	0	0	0	0	0	0	0	0	0	0	0	0	0	0	0	0	0	0	0	0	0	0
Jaglot	Astore	35.685000°	74.623889°	Karsoq	Elaeagnus rhamnoides (L.) A.Nelson	Elaeagnaceae	fruit, leaves	1	Direct, decoction	Shrub	0	1	0	0	0	0	0	0	0	0	0	0	0	0	0	0	0	0	0	0	0	0	0	0	0	0	0	0	0
Rattu	Astore	35.168461°	74.791752°1	Karsoq	Elaeagnus rhamnoides (L.) A.Nelson	Elaeagnaceae	fruit, leaves	2	Direct, decoction	Shrub	0	1	0	0	0	0	0	1	0	0	0	0	0	0	0	0	0	0	0	0	0	0	0	0	0	0	0	0	0
Gahkuch	Ghizer	36.162949°	73.755492°	Buru	Elaeagnus rhamnoides (L.) A.Nelson	Elaeagnaceae	Fruit, stem, leaves	14	Decoction, direct, powder/grinded, ash	Shrub	1	2	1	0	0	0	1	2	2	0	0	1	0	1	1	0	0	0	0	0	0	1	0	1	0	0	0	0	0
Gahkuch	Ghizer	36.162949°	73.755492°	Buru	Elaeagnus rhamnoides (L.) A.Nelson	Elaeagnaceae	Fruit, stem, leaves	12	Decoction, direct, powder/grinded, ash	Shrub	1	0	0	0	0	0	1	2	3	0	0	1	0	1	1	0	0	0	0	0	0	1	0	1	0	0	0	0	0
Gahkuch	Ghizer	36.162949°	73.755492°	Buru	Elaeagnus rhamnoides (L.) A.Nelson	Elaeagnaceae	Fruit, stem, leaves	7	Decoction, direct, powder/grinded, ash	Shrub	1	0	1	0	0	0	1	0	1	0	0	0	0	0	1	0	0	0	0	0	0	1	0	1	0	0	0	0	0
Gahkuch	Ghizer	36.162949°	73.755492°	Buru	Elaeagnus rhamnoides (L.) A.Nelson	Elaeagnaceae	Fruit, stem, leaves	11	Decoction, direct, powder/grinded, ash	Shrub	1	1	1	0	0	0	1	2	1	0	0	1	0	0	1	0	0	0	0	0	0	1	0	1	0	0	0	0	0
Gahkuch	Ghizer	36.162949°	73.755492°	Buru	Elaeagnus rhamnoides (L.) A.Nelson	Elaeagnaceae	Fruit, stem, leaves	12	Decoction, direct, powder/grinded, ash	Shrub	1	2	1	0	0	0	1	0	2	0	0	1	0	1	1	0	0	0	0	0	0	1	0	1	0	0	0	0	0
Gahkuch	Ghizer	36.162949°	73.755492°	Buru	Elaeagnus rhamnoides (L.) A.Nelson	Elaeagnaceae	fruit	7	Decoction, direct, powder/grinded, ash	Shrub	1	2	0	0	0	0	0	2	0	0	0	1	0	1	0	0	0	0	0	0	0	0	0	0	0	0	0	0	0
Gahkuch	Ghizer	36.162949°	73.755492°	Buru	Elaeagnus rhamnoides (L.) A.Nelson	Elaeagnaceae	Fruit, stem, leaves	9	Decoction, direct, powder/grinded, ash	Shrub	1	1	1	0	0	0	1	0	2	0	0	0	0	0	1	0	0	0	0	0	0	1	0	1	0	0	0	0	0
Gahkuch	Ghizer	36.162949°	73.755492°	Buru	Elaeagnus rhamnoides (L.) A.Nelson	Elaeagnaceae	fruit	7	Decoction, direct, powder/grinded, ash	Shrub	1	2	0	0	0	0	0	1	2	0	0	0	0	0	0	0	0	0	0	0	0	1	0	0	0	0	0	0	0
Yaseen	Ghizer	36.369354°	73.332552°	Buru	Elaeagnus rhamnoides (L.) A.Nelson	Elaeagnaceae	Fruit, stem, leaves	12	Decoction, direct, powder/grinded, ash	Shrub	1	2	0	0	0	0	1	2	2	0	0	1	0	0	1	0	0	0	0	0	0	1	0	1	0	0	0	0	0
Yaseen	Ghizer	36.369354°	73.332552°	Buru	Elaeagnus rhamnoides (L.) A.Nelson	Elaeagnaceae	Fruit, stem, leaves	6	Decoction, direct, powder/grinded, ash	Shrub	0	1	0	0	0	0	1	0	1	0	0	0	0	0	1	0	0	0	0	0	0	1	0	1	0	0	0	0	0
Yaseen	Ghizer	36.369354°	73.332552°	Buru	Elaeagnus rhamnoides (L.) A.Nelson	Elaeagnaceae	Fruit, stem, leaves	8	Decoction, direct, powder/grinded, ash	Shrub	1	2	1	0	0	0	1	0	0	0	0	0	0	1	1	0	0	0	0	0	0	0	0	1	0	0	0	0	0
Yaseen	Ghizer	36.369354°	73.332552°	Buru	Elaeagnus rhamnoides (L.) A.Nelson	Elaeagnaceae	Fruit, stem, leaves	9	Decoction, direct, powder/grinded, ash	Shrub	1	1	1	0	0	0	1	0	1	0	0	0	0	1	1	0	0	0	0	0	0	1	0	1	0	0	0	0	0
Yaseen	Ghizer	36.369354°	73.332552°	Buru	Elaeagnus rhamnoides (L.) A.Nelson	Elaeagnaceae	Fruit, stem, leaves	11	Decoction, direct, powder/grinded, ash	Shrub	1	2	0	0	0	0	1	2	2	0	0	1	0	0	1	0	0	0	0	0	0	0	0	1	0	0	0	0	0
Yaseen	Ghizer	36.369354°	73.332552°	Buru	Elaeagnus rhamnoides (L.) A.Nelson	Elaeagnaceae	fruit	5	Decoction, direct, powder/grinded, ash	Shrub	0	2	0	0	0	0	0	1	2	0	0	0	0	0	0	0	0	0	0	0	0	0	0	0	0	0	0	0	0
Yaseen	Ghizer	36.369354°	73.332552°	Buru	Elaeagnus rhamnoides (L.) A.Nelson	Elaeagnaceae	fruit	8	Decoction, direct, powder/grinded, ash	Shrub	1	2	0	0	0	0	0	2	2	0	0	0	0	1	0	0	0	0	0	0	0	0	0	0	0	0	0	0	0
Yaseen	Ghizer	36.369354°	73.332552°	Buru	Elaeagnus rhamnoides (L.) A.Nelson	Elaeagnaceae	Fruit, stem, leaves	9	Decoction, direct, powder/grinded, ash	Shrub	0	1	1	0	0	0	1	1	1	0	0	0	0	1	1	0	0	0	0	0	0	1	0	1	0	0	0	0	0
Yaseen	Ghizer	36.369354°	73.332552°	Buru	Elaeagnus rhamnoides (L.) A.Nelson	Elaeagnaceae	fruit	8	Decoction, direct, powder/grinded, ash	Shrub	1	2	0	0	0	0	0	2	2	0	0	0	0	1	0	0	0	0	0	0	0	0	0	0	0	0	0	0	0
Yaseen	Ghizer	36.369354°	73.332552°	Buru	Elaeagnus rhamnoides (L.) A.Nelson	Elaeagnaceae	fruit	7	Decoction, direct, powder/grinded, ash	Shrub	1	2	0	0	0	0	0	1	2	0	0	1	0	0	0	0	0	0	0	0	0	0	0	0	0	0	0	0	0
Bilchar/Bagrote	Gilgit	35.942517°	74.545274°	Buroh	Elaeagnus rhamnoides (L.) A.Nelson	Elaeagnaceae	fruit, root, wood	3	Decoction, direct, powder/grinded, ash	Shrub	0	0	0	0	0	0	0	1	0	0	0	0	0	0	0	0	0	0	1	0	0	0	1	0	0	0	0	0	0
Bilchar/Bagrote	Gilgit	35.942517°	74.545274°	Buroh	Elaeagnus rhamnoides (L.) A.Nelson	Elaeagnaceae	fruit, root, wood	3	Decoction, direct, powder/grinded, ash	Shrub	0	0	0	0	0	0	1	1	0	0	0	0	0	0	0	0	0	0	0	0	0	0	1	0	0	0	0	0	0
Bilchar/Bagrote	Gilgit	35.942517°	74.545274°	Seabuckthorn	Elaeagnus rhamnoides (L.) A.Nelson	Eleagnaceae	fruit, root, wood	16	Decoction, direct, powder/grinded, ash	Shrub	0	5	1	0	0	0	0	2	0	1	3	4	0	0	0	0	0	0	0	0	0	0	0	0	0	0	0	0	0
Bilchar/Bagrote	Gilgit	35.942517°	74.545274°	Buroh	Elaeagnus rhamnoides (L.) A.Nelson	Elaeagnaceae	fruit, root, wood	5	Decoction, direct	Shrub	0	0	0	0	0	0	1	1	0	0	0	1	0	0	0	0	0	0	1	0	0	0	1	0	0	0	0	0	0
Bilchar/Bagrote	Gilgit	35.942517°	74.545274°	Seabuckthorn	Elaeagnus rhamnoides (L.) A.Nelson	Eleagnaceae	fruit, root, wood	16	Decoction, direct, powder/grinded, ash	Shrub	0	5	1	0	0	0	0	2	0	1	3	4	0	0	0	0	0	0	0	0	0	0	0	0	0	0	0	0	0
Bilchar/Bagrote	Gilgit	35.942517°	74.545274°	Seabuckthorn	Elaeagnus rhamnoides (L.) A.Nelson	Eleagnaceae	fruit, root, wood	16	Decoction, direct, powder/grinded, ash	Shrub	0	5	1	0	0	0	0	2	0	1	3	4	0	0	0	0	0	0	0	0	0	0	0	0	0	0	0	0	0
Bilchar/Bagrote	Gilgit	35.942517°	74.545274°	Buroh	Elaeagnus rhamnoides (L.) A.Nelson	Elaeagnaceae	fruit, root, wood	5	Decoction, direct, powder/grinded, ash	Shrub	0	0	0	0	0	0	1	1	0	0	0	1	0	0	0	0	0	0	1	0	0	0	1	0	0	0	0	0	0
Bilchar/Bagrote	Gilgit	35.942517°	74.545274°	Seabuckthorn	Elaeagnus rhamnoides (L.) A.Nelson	Eleagnaceae	fruit, root, wood	15	Decoction, direct, powder/grinded, ash	Shrub	0	5	1	0	0	0	0	2	0	0	3	4	0	0	0	0	0	0	0	0	0	0	0	0	0	0	0	0	0
Bilchar/Bagrote	Gilgit	35.942517°	74.545274°	Buroh	Elaeagnus rhamnoides (L.) A.Nelson	Elaeagnaceae	fruit, root, wood	5	Decoction, direct, powder/grinded, ash	Shrub	0	0	0	0	0	0	1	1	0	0	0	1	0	0	0	0	0	0	1	0	0	0	1	0	0	0	0	0	0
Bilchar/Bagrote	Gilgit	35.942517°	74.545274°	Buroh	Elaeagnus rhamnoides (L.) A.Nelson	Elaeagnaceae	fruit, root, wood	5	Decoction, direct, powder/grinded, ash	Shrub	0	0	0	0	0	0	1	1	0	0	0	1	0	0	0	0	0	0	1	0	0	0	1	0	0	0	0	0	0
Danyore	Gilgit	35.919880°	74.386181°	Buroh	Elaeagnus rhamnoides (L.) A.Nelson	Elaeagnaceae	fruit, root, wood	5	Decoction, direct	Shrub	0	0	0	0	0	0	1	1	0	0	0	1	0	0	0	0	0	0	1	0	0	0	1	0	0	0	0	0	0
Danyore	Gilgit	35.919880°	74.386181°	Buroh	Elaeagnus rhamnoides (L.) A.Nelson	Elaeagnaceae	fruit, root, wood	4	Decoction, direct, powder/grinded, ash	Shrub	0	0	0	0	0	0	1	1	0	0	0	0	0	0	0	0	0	0	1	0	0	0	1	0	0	0	0	0	0
Danyore	Gilgit	35.919880°	74.386181°	Buroh	Elaeagnus rhamnoides (L.) A.Nelson	Elaeagnaceae	fruit, root, wood	3	Decoction, direct	Shrub	0	0	0	0	0	0	0	1	0	0	0	1	0	0	0	0	0	0	1	0	0	0	0	0	0	0	0	0	0
Danyore	Gilgit	35.919880°	74.386181°	Seabuckthorn	Elaeagnus rhamnoides (L.) A.Nelson	Eleagnaceae	fruit, root, wood	15	Decoction, direct, powder/grinded, ash	Shrub	0	5	1	0	0	0	0	2	0	0	3	4	0	0	0	0	0	0	0	0	0	0	0	0	0	0	0	0	0
Danyore	Gilgit	35.919880°	74.386181°	Buroh	Elaeagnus rhamnoides (L.) A.Nelson	Elaeagnaceae	fruit, root, wood	5	Decoction, direct, powder/grinded, ash	Shrub	0	0	0	0	0	0	1	1	0	0	0	1	0	0	0	0	0	0	1	0	0	0	1	0	0	0	0	0	0
Danyore	Gilgit	35.919880°	74.386181°	Buroh	Elaeagnus rhamnoides (L.) A.Nelson	Elaeagnaceae	fruit, root, wood	5	Decoction, direct, powder/grinded, ash	Shrub	0	0	0	0	0	0	1	1	0	0	0	1	0	0	0	0	0	0	1	0	0	0	1	0	0	0	0	0	0
Danyore	Gilgit	35.919880°	74.386181°	Seabuckthorn	Elaeagnus rhamnoides (L.) A.Nelson	Eleagnaceae	fruit, root, wood	16	Decoction, direct, powder/grinded, ash	Shrub	0	5	1	0	0	0	0	2	0	1	3	4	0	0	0	0	0	0	0	0	0	0	0	0	0	0	0	0	0
Danyore	Gilgit	35.919880°	74.386181°	Seabuckthorn	Elaeagnus rhamnoides (L.) A.Nelson	Eleagnaceae	fruit, root, wood	15	Decoction, direct, powder/grinded, ash	Shrub	0	5	1	0	0	0	0	2	0	0	3	4	0	0	0	0	0	0	0	0	0	0	0	0	0	0	0	0	0
Danyore	Gilgit	35.919880°	74.386181°	Seabuckthorn	Elaeagnus rhamnoides (L.) A.Nelson	Eleagnaceae	fruit, root, wood	15	Decoction, direct, powder/grinded, ash	Shrub	0	5	1	0	0	0	0	2	0	0	3	4	0	0	0	0	0	0	0	0	0	0	0	0	0	0	0	0	0
Jalalabad	Gilgit	35.880457°	74.493590°	Buroh	Elaeagnus rhamnoides (L.) A.Nelson	Elaeagnaceae	fruit, root, wood	4	Decoction, direct, powder/grinded, ash	Shrub	0	0	0	0	0	0	0	1	0	0	0	1	0	0	0	0	0	0	1	0	0	0	1	0	0	0	0	0	0
Jalalabad	Gilgit	35.880457°	74.493590°	Buroh	Elaeagnus rhamnoides (L.) A.Nelson	Elaeagnaceae	fruit, root, wood	4	Decoction, direct	Shrub	0	0	0	0	0	0	1	1	0	0	0	1	0	0	0	0	0	0	0	0	0	0	1	0	0	0	0	0	0
Jalalabad	Gilgit	35.880457°	74.493590°	Seabuckthorn	Elaeagnus rhamnoides (L.) A.Nelson	Eleagnaceae	fruit, root, wood	15	Decoction, direct, powder/grinded, ash	Shrub	0	5	1	0	0	0	0	2	0	0	3	4	0	0	0	0	0	0	0	0	0	0	0	0	0	0	0	0	0
Jalalabad	Gilgit	35.880457°	74.493590°	Seabuckthorn	Elaeagnus rhamnoides (L.) A.Nelson	Eleagnaceae	fruit, root, wood	16	Decoction, direct, powder/grinded, ash	Shrub	0	5	1	0	0	0	0	2	0	1	3	4	0	0	0	0	0	0	0	0	0	0	0	0	0	0	0	0	0
Jalalabad	Gilgit	35.880457°	74.493590°	Seabuckthorn	Elaeagnus rhamnoides (L.) A.Nelson	Eleagnaceae	fruit, root, wood	15	Decoction, direct, powder/grinded, ash	Shrub	0	5	1	0	0	0	0	2	0	0	3	4	0	0	0	0	0	0	0	0	0	0	0	0	0	0	0	0	0
Jalalabad	Gilgit	35.880457°	74.493590°	Seabuckthorn	Elaeagnus rhamnoides (L.) A.Nelson	Eleagnaceae	fruit, root, wood	15	Decoction, direct, powder/grinded, ash	Shrub	0	5	1	0	0	0	0	2	0	0	3	4	0	0	0	0	0	0	0	0	0	0	0	0	0	0	0	0	0
Jalalabad	Gilgit	35.880457°	74.493590°	Seabuckthorn	Elaeagnus rhamnoides (L.) A.Nelson	Eleagnaceae	fruit, root, wood	16	Decoction, direct, powder/grinded, ash	Shrub	0	5	1	0	0	0	0	2	0	1	3	4	0	0	0	0	0	0	0	0	0	0	0	0	0	0	0	0	0
Jalalabad	Gilgit	35.880457°	74.493590°	Buroh	Elaeagnus rhamnoides (L.) A.Nelson	Elaeagnaceae	fruit, root, wood	5	Decoction, direct, powder/grinded, ash	Shrub	0	0	0	0	0	0	1	1	0	0	0	1	0	0	0	0	0	0	1	0	0	0	1	0	0	0	0	0	0
Jalalabad	Gilgit	35.880457°	74.493590°	Seabuckthorn	Elaeagnus rhamnoides (L.) A.Nelson	Eleagnaceae	fruit, root, wood	16	Decoction, direct, powder/grinded, ash	Shrub	0	5	1	0	0	0	0	2	0	1	3	4	0	0	0	0	0	0	0	0	0	0	0	0	0	0	0	0	0
Kargha	Gilgit	35.915251°	74.257648°	Buru	Elaeagnus rhamnoides (L.) A.Nelson	Elaeagnaceae	fruit	7	Decoction, direct, powder/grinded, ash	Shrub	0	3	0	0	0	0	0	2	0	1	1	0	0	0	0	0	0	0	0	0	0	0	0	0	0	0	0	0	0
Kargha	Gilgit	35.915251°	74.257648°	Buru	Elaeagnus rhamnoides (L.) A.Nelson	Elaeagnaceae	fruit	9	Decoction, direct, powder/grinded, ash	Shrub	0	4	1	0	0	0	0	1	0	1	1	1	0	0	0	0	0	0	0	0	0	0	0	0	0	0	0	0	0
Kargha	Gilgit	35.915251°	74.257648°	Buru	Elaeagnus rhamnoides (L.) A.Nelson	Elaeagnaceae	fruit	10	Decoction, direct, powder/grinded, ash	Shrub	0	3	1	0	0	0	0	1	0	0	2	3	0	0	0	0	0	0	0	0	0	0	0	0	0	0	0	0	0
Kargha	Gilgit	35.915251°	74.257648°	Buru	Elaeagnus rhamnoides (L.) A.Nelson	Elaeagnaceae	fruit	11	Decoction, direct, powder/grinded, ash	Shrub	0	4	0	0	0	0	0	1	0	1	3	2	0	0	0	0	0	0	0	0	0	0	0	0	0	0	0	0	0
Kargha	Gilgit	35.915251°	74.257648°	Buru	Elaeagnus rhamnoides (L.) A.Nelson	Elaeagnaceae	fruit	8	Decoction, direct, powder/grinded, ash	Shrub	0	3	1	0	0	0	0	1	0	1	1	1	0	0	0	0	0	0	0	0	0	0	0	0	0	0	0	0	0
Kargha	Gilgit	35.915251°	74.257648°	Buru	Elaeagnus rhamnoides (L.) A.Nelson	Elaeagnaceae	fruit	7	Decoction, direct, powder/grinded, ash	Shrub	0	1	1	0	0	0	0	2	0	1	1	1	0	0	0	0	0	0	0	0	0	0	0	0	0	0	0	0	0
Kargha	Gilgit	35.915251°	74.257648°	Buru	Elaeagnus rhamnoides (L.) A.Nelson	Elaeagnaceae	fruit	10	Decoction, direct, powder/grinded, ash	Shrub	0	5	0	0	0	0	0	0	0	0	2	3	0	0	0	0	0	0	0	0	0	0	0	0	0	0	0	0	0
Kargha	Gilgit	35.915251°	74.257648°	Buru	Elaeagnus rhamnoides (L.) A.Nelson	Elaeagnaceae	fruit	7	Decoction, direct, powder/grinded, ash	Shrub	0	3	0	0	0	0	0	2	0	0	1	1	0	0	0	0	0	0	0	0	0	0	0	0	0	0	0	0	0
Kargha	Gilgit	35.915251°	74.257648°	Buru	Elaeagnus rhamnoides (L.) A.Nelson	Elaeagnaceae	Fruit	6	Decoction, direct, powder/grinded, ash	Shrub	0	0	1	0	0	0	0	0	0	0	3	1	0	0	1	0	0	0	0	0	0	0	0	0	0	0	0	0	0
Kargha	Gilgit	35.915251°	74.257648°	Buru	Elaeagnus rhamnoides (L.) A.Nelson	Elaeagnaceae	Fruit	5	Decoction, direct, powder/grinded, ash	Shrub	0	0	1	0	0	0	0	0	0	0	2	1	0	0	1	0	0	0	0	0	0	0	0	0	0	0	0	0	0
Kargha	Gilgit	35.915251°	74.257648°	Buru	Elaeagnus rhamnoides (L.) A.Nelson	Elaeagnaceae	Fruit	5	Decoction, direct, powder/grinded, ash	Shrub	0	0	1	0	0	0	0	0	0	0	3	0	0	0	1	0	0	0	0	0	0	0	0	0	0	0	0	0	0
Kargha	Gilgit	35.915251°	74.257648°	Buru	Elaeagnus rhamnoides (L.) A.Nelson	Elaeagnaceae	Fruit	4	Decoction, direct, powder/grinded, ash	Shrub	0	0	0	0	0	0	0	0	0	0	3	1	0	0	0	0	0	0	0	0	0	0	0	0	0	0	0	0	0
Kargha	Gilgit	35.915251°	74.257648°	Buru	Elaeagnus rhamnoides (L.) A.Nelson	Elaeagnaceae	Fruit	3	Decoction, direct	Shrub	0	0	1	0	0	0	0	0	0	0	1	0	0	0	1	0	0	0	0	0	0	0	0	0	0	0	0	0	0
Rahimabad	Gilgit	36.118837°	74.297376°	Buru	Elaeagnus rhamnoides (L.) A.Nelson	Elaeagnaceae	fruit	16	Decoction, direct, powder/grinded, ash	Shrub	0	5	1	0	0	0	0	2	0	1	3	4	0	0	0	0	0	0	0	0	0	0	0	0	0	0	0	0	0
Rahimabad	Gilgit	36.118837°	74.297376°	Buru	Elaeagnus rhamnoides (L.) A.Nelson	Elaeagnaceae	fruit	14	Decoction, direct, powder/grinded, ash	Shrub	0	5	1	0	0	0	0	1	0	1	2	4	0	0	0	0	0	0	0	0	0	0	0	0	0	0	0	0	0
Rahimabad	Gilgit	36.118837°	74.297376°	Buru	Elaeagnus rhamnoides (L.) A.Nelson	Elaeagnaceae	fruit	7	Decoction, direct, powder/grinded, ash	Shrub	0	2	1	0	0	0	0	1	0	0	2	1	0	0	0	0	0	0	0	0	0	0	0	0	0	0	0	0	0
Rahimabad	Gilgit	36.118837°	74.297376°	Buru	Elaeagnus rhamnoides (L.) A.Nelson	Elaeagnaceae	fruit	9	Decoction, direct, powder/grinded, ash	Shrub	0	3	1	0	0	0	0	1	0	1	2	1	0	0	0	0	0	0	0	0	0	0	0	0	0	0	0	0	0
Rahimabad	Gilgit	36.118837°	74.297376°	Buru	Elaeagnus rhamnoides (L.) A.Nelson	Elaeagnaceae	fruit	8	Decoction, direct, powder/grinded, ash	Shrub	0	5	1	0	0	0	0	1	0	0	1	0	0	0	0	0	0	0	0	0	0	0	0	0	0	0	0	0	0
Rahimabad	Gilgit	36.118837°	74.297376°	Buru	Elaeagnus rhamnoides (L.) A.Nelson	Elaeagnaceae	fruit	10	Decoction, direct, powder/grinded, ash	Shrub	0	5	0	0	0	0	0	1	0	0	0	4	0	0	0	0	0	0	0	0	0	0	0	0	0	0	0	0	0
Rahimabad	Gilgit	36.118837°	74.297376°	Buru	Elaeagnus rhamnoides (L.) A.Nelson	Elaeagnaceae	Fruit	2	Decoction, direct	Shrub	0	0	0	0	0	0	0	0	0	0	2	0	0	0	0	0	0	0	0	0	0	0	0	0	0	0	0	0	0
Rahimabad	Gilgit	36.118837°	74.297376°	Buru	Elaeagnus rhamnoides (L.) A.Nelson	Elaeagnaceae	Fruit	3	Decoction, direct	Shrub	0	0	1	0	0	0	0	0	0	0	1	1	0	0	0	0	0	0	0	0	0	0	0	0	0	0	0	0	0
Aliabad	Hunza	36.308563°	74.619496°	Chanso	Elaeagnus rhamnoides (L.) A.Nelson	Elaeagnaceae	fruit	1	Direct, decoction	Shrub	0	0	0	0	0	0	1	0	0	0	0	0	0	0	0	0	0	0	0	0	0	0	0	0	0	0	0	0	0
Aliabad	Hunza	36.308563°	74.619496°	Chanso	Elaeagnus rhamnoides (L.) A.Nelson	Elaeagnaceae	fruit	1	Direct, decoction	Shrub	0	0	0	0	0	0	1	0	0	0	0	0	0	0	0	0	0	0	0	0	0	0	0	0	0	0	0	0	0
Aliabad	Hunza	36.308563°	74.619496°	Chanso	Elaeagnus rhamnoides (L.) A.Nelson	Elaeagnaceae	fruit	1	Direct, decoction	Shrub	0	0	0	0	0	0	1	0	0	0	0	0	0	0	0	0	0	0	0	0	0	0	0	0	0	0	0	0	0
Aliabad	Hunza	36.308563°	74.619496°	Chanso	Elaeagnus rhamnoides (L.) A.Nelson	Elaeagnaceae	fruit	1	Direct, decoction	Shrub	0	0	0	0	0	0	1	0	0	0	0	0	0	0	0	0	0	0	0	0	0	0	0	0	0	0	0	0	0
Aliabad	Hunza	36.308563°	74.619496°	Chanso	Elaeagnus rhamnoides (L.) A.Nelson	Elaeagnaceae	fruit	1	Direct, decoction	Shrub	0	0	0	0	0	0	1	0	0	0	0	0	0	0	0	0	0	0	0	0	0	0	0	0	0	0	0	0	0
Altit	Hunza	36.316102°	74.681835°	Chanso	Elaeagnus rhamnoides (L.) A.Nelson	Elaeagnaceae	fruit	1	Direct, decoction	Shrub	0	0	0	0	0	0	1	0	0	0	0	0	0	0	0	0	0	0	0	0	0	0	0	0	0	0	0	0	0
Altit	Hunza	36.316102°	74.681835°	Chanso	Elaeagnus rhamnoides (L.) A.Nelson	Elaeagnaceae	fruit	1	Direct, decoction	Shrub	0	0	0	0	0	0	1	0	0	0	0	0	0	0	0	0	0	0	0	0	0	0	0	0	0	0	0	0	0
Ghulkin	Hunza	36.407318°	74.863984°	Zakh	Elaeagnus rhamnoides (L.) A.Nelson	Elaeagnaceae	berries	6	Decoction, powder/grinded, ash	Shrub	0	0	0	2	0	0	1	0	0	0	0	0	0	0	1	0	0	0	0	0	0	0	0	0	0	0	2	0	0
Ghulkin	Hunza	36.407318°	74.863984°	Zakh	Elaeagnus rhamnoides (L.) A.Nelson	Elaeagnaceae	berries	2	Decoction, powder/grinded, ash	Shrub	0	0	0	2	0	0	0	0	0	0	0	0	0	0	0	0	0	0	0	0	0	0	0	0	0	0	0	0	0
Ghulkin	Hunza	36.407318°	74.863984°	Zakh	Elaeagnus rhamnoides (L.) A.Nelson	Elaeagnaceae	berries	6	Decoction, powder/grinded, ash	Shrub	0	0	0	2	0	0	1	0	0	0	0	0	0	0	1	0	0	0	0	0	0	0	0	0	0	0	2	0	0
Ghulkin	Hunza	36.407318°	74.863984°	Zakh	Elaeagnus rhamnoides (L.) A.Nelson	Elaeagnaceae	berries	2	Decoction, powder/grinded, ash	Shrub	0	0	0	2	0	0	0	0	0	0	0	0	0	0	0	0	0	0	0	0	0	0	0	0	0	0	0	0	0
Ghulkin	Hunza	36.407318°	74.863984°	Zakh	Elaeagnus rhamnoides (L.) A.Nelson	Elaeagnaceae	berries	2	Decoction, powder/grinded, ash	Shrub	0	0	0	2	0	0	0	0	0	0	0	0	0	0	0	0	0	0	0	0	0	0	0	0	0	0	0	0	0
Karimabad	Hunza	36.326408°	74.664316°	Chanso	Elaeagnus rhamnoides (L.) A.Nelson	Elaeagnaceae	fruit	1	Direct, decoction	Shrub	0	0	0	0	0	0	1	0	0	0	0	0	0	0	0	0	0	0	0	0	0	0	0	0	0	0	0	0	0
Karimabad	Hunza	36.326408°	74.664316°	Chanso	Elaeagnus rhamnoides (L.) A.Nelson	Elaeagnaceae	fruit	1	Direct, decoction	Shrub	0	0	0	0	0	0	1	0	0	0	0	0	0	0	0	0	0	0	0	0	0	0	0	0	0	0	0	0	0
Karimabad	Hunza	36.326408°	74.664316°	Chanso	Elaeagnus rhamnoides (L.) A.Nelson	Elaeagnaceae	fruit	1	Direct, decoction	Shrub	0	0	0	0	0	0	1	0	0	0	0	0	0	0	0	0	0	0	0	0	0	0	0	0	0	0	0	0	0
Murtazaabad	Hunza	36.285517°	74.607833°	Chanso	Elaeagnus rhamnoides (L.) A.Nelson	Elaeagnaceae	fruit	1	Direct, decoction	Shrub	0	0	0	0	0	0	1	0	0	0	0	0	0	0	0	0	0	0	0	0	0	0	0	0	0	0	0	0	0
Shimshal	Hunza	36.436464°	75.313109°	Zakh	Elaeagnus rhamnoides (L.) A.Nelson	Elaeagnaceae	berries	6	Decoction, powder/grinded, ash	Shrub	0	0	0	2	0	0	1	0	0	0	0	0	0	0	1	0	0	0	0	0	0	0	0	0	0	0	2	0	0
Shimshal	Hunza	36.436464°	75.313109°	Zakh	Elaeagnus rhamnoides (L.) A.Nelson	Elaeagnaceae	berries	6	Decoction, powder/grinded, ash	Shrub	0	0	0	2	0	0	1	0	0	0	0	0	0	0	1	0	0	0	0	0	0	0	0	0	0	0	2	0	0
Ghulmit	Nagar	36.241766°	74.462110°	Buru	Elaeagnus rhamnoides (L.) A.Nelson	Elaeagnaceae	leaves, fruit, seed	4	Decoction, direct, powder/grinded	Shrub	0	1	1	0	0	0	0	1	0	0	1	0	0	0	0	0	0	0	0	0	0	0	0	0	0	0	0	0	0
Ghulmit	Nagar	36.241766°	74.462110°	Buru	Elaeagnus rhamnoides (L.) A.Nelson	Elaeagnaceae	leaves, fruit, seed	4	Decoction, direct, powder/grinded, ash	Shrub	0	2	0	0	0	0	0	1	0	0	1	0	0	0	0	0	0	0	0	0	0	0	0	0	0	0	0	0	0
Ghulmit	Nagar	36.241766°	74.462110°	Buru	Elaeagnus rhamnoides (L.) A.Nelson	Elaeagnaceae	leaves, fruit, seed	5	Decoction, direct, powder/grinded, ash	Shrub	0	2	0	0	0	0	0	1	0	0	2	0	0	0	0	0	0	0	0	0	0	0	0	0	0	0	0	0	0
Minapin	Nagar	36.250922°	74.536075°	Buru	Elaeagnus rhamnoides (L.) A.Nelson	Elaeagnaceae	leaves, fruit, seed	5	Decoction, direct, powder/grinded, ash	Shrub	0	1	1	0	0	0	0	2	0	0	1	0	0	0	0	0	0	0	0	0	0	0	0	0	0	0	0	0	0
Minapin	Nagar	36.250922°	74.536075°	Buru	Elaeagnus rhamnoides (L.) A.Nelson	Elaeagnaceae	leaves, fruit, seed	5	Decoction, direct, powder/grinded, ash	Shrub	0	2	1	0	0	0	0	1	0	0	1	0	0	0	0	0	0	0	0	0	0	0	0	0	0	0	0	0	0
Nagar Khas	Nagar	36.276377°	74.719955°	Buru	Elaeagnus rhamnoides (L.) A.Nelson	Elaeagnaceae	leaves, fruit, seed	4	Decoction, direct, powder/grinded, ash	Shrub	0	2	1	0	0	0	0	0	0	0	1	0	0	0	0	0	0	0	0	0	0	0	0	0	0	0	0	0	0
Nagar Khas	Nagar	36.276377°	74.719955°	Buru	Elaeagnus rhamnoides (L.) A.Nelson	Elaeagnaceae	leaves, fruit, seed	3	Decoction, direct, powder/grinded	Shrub	0	1	0	0	0	0	0	1	0	0	1	0	0	0	0	0	0	0	0	0	0	0	0	0	0	0	0	0	0
Basho	Skardu	35.469494°	75.359156°	Soq/Rema	Elaeagnus rhamnoides (L.) A.Nelson	Elaeagnaceae	leaves, fruit, seed	3	Direct, powder/grinded, ash	Shrub	0	0	0	0	0	0	0	0	0	0	0	0	0	0	1	0	0	0	0	0	0	1	0	1	0	0	0	0	0
Basho	Skardu	35.469494°	75.359156°	Soq/Rema	Elaeagnus rhamnoides (L.) A.Nelson	Elaeagnaceae	leaves	2	Decoction, direct, ash	Shrub	0	0	1	0	0	0	0	0	1	0	0	0	0	0	0	0	0	0	0	0	0	0	0	0	0	0	0	0	0
Basho	Skardu	35.469494°	75.359156°	Soq/Rema	Elaeagnus rhamnoides (L.) A.Nelson	Elaeagnaceae	leaves, fruit, seed	3	Decoction, direct, ash	Shrub	0	0	0	0	0	0	0	0	0	0	0	0	0	0	1	0	0	0	0	0	0	1	0	1	0	0	0	0	0
Basho	Skardu	35.469494°	75.359156°	Soq/Rema	Elaeagnus rhamnoides (L.) A.Nelson	Elaeagnaceae	leaves	2	Decoction, direct, ash	Shrub	0	0	1	0	0	0	0	0	1	0	0	0	0	0	0	0	0	0	0	0	0	0	0	0	0	0	0	0	0
Hashupi	Skardu	35.485929°	75.696578°	Soq/Rema	Elaeagnus rhamnoides (L.) A.Nelson	Elaeagnaceae	leaves	2	Direct, powder/grinded, ash	Shrub	0	0	1	0	0	0	0	0	1	0	0	0	0	0	0	0	0	0	0	0	0	0	0	0	0	0	0	0	0
Hashupi	Skardu	35.485929°	75.696578°	Soq/Rema	Elaeagnus rhamnoides (L.) A.Nelson	Elaeagnaceae	leaves	2	Direct, powder/grinded, ash	Shrub	0	0	1	0	0	0	0	0	1	0	0	0	0	0	0	0	0	0	0	0	0	0	0	0	0	0	0	0	0
Hashupi	Skardu	35.485929°	75.696578°	Soq/Rema	Elaeagnus rhamnoides (L.) A.Nelson	Elaeagnaceae	leaves	2	Direct, powder/grinded, ash	Shrub	0	0	1	0	0	0	0	0	1	0	0	0	0	0	0	0	0	0	0	0	0	0	0	0	0	0	0	0	0
Hashupi	Skardu	35.485929°	75.696578°	Soq/Rema	Elaeagnus rhamnoides (L.) A.Nelson	Elaeagnaceae	leaves, fruit, seed	3	Direct, powder/grinded, ash	Shrub	0	0	0	0	0	0	0	0	0	0	0	0	0	0	1	0	0	0	0	0	0	1	0	1	0	0	0	0	0
Hashupi	Skardu	35.485929°	75.696578°	Soq/Rema	Elaeagnus rhamnoides (L.) A.Nelson	Elaeagnaceae	leaves	2	Decoction, direct, ash	Shrub	0	0	1	0	0	0	0	0	1	0	0	0	0	0	0	0	0	0	0	0	0	0	0	0	0	0	0	0	0
Hashupi	Skardu	35.485929°	75.696578°	Soq/Rema	Elaeagnus rhamnoides (L.) A.Nelson	Elaeagnaceae	leaves, fruit, seed	3	Decoction, direct, ash	Shrub	0	0	0	0	0	0	0	0	0	0	0	0	0	0	1	0	0	0	0	0	0	1	0	1	0	0	0	0	0
Hosho	Skardu	35.345214°	75.515283°	Soq/Rema	Elaeagnus rhamnoides (L.) A.Nelson	Elaeagnaceae	leaves, fruit, seed	3	Direct, powder/grinded, ash	Shrub	0	0	0	0	0	0	0	0	0	0	0	0	0	0	1	0	0	0	0	0	0	1	0	1	0	0	0	0	0
Hosho	Skardu	35.345214°	75.515283°	Soq/Rema	Elaeagnus rhamnoides (L.) A.Nelson	Elaeagnaceae	leaves, fruit, seed	2	Decoction, powder/grinded, ash	Shrub	0	0	1	0	0	0	0	0	1	0	0	0	0	0	0	0	0	0	0	0	0	0	0	0	0	0	0	0	0
Thowar	Skardu	35.609167°	75.203611°	Soq/Rema	Elaeagnus rhamnoides (L.) A.Nelson	Elaeagnaceae	leaves, fruit, seed	3	Direct, powder/grinded, ash	Shrub	0	0	0	0	0	0	0	0	0	0	0	0	0	0	1	0	0	0	0	0	0	1	0	1	0	0	0	0	0
Thowar	Skardu	35.609167°	75.203611°	Soq/Rema	Elaeagnus rhamnoides (L.) A.Nelson	Elaeagnaceae	leaves, fruit, seed	3	Decoction, direct, ash	Shrub	0	0	0	0	0	0	0	0	0	0	0	0	0	0	1	0	0	0	0	0	0	1	0	1	0	0	0	0	0
Gahkuch	Ghizer	36.162949°	73.755492°	Soom	Ephedra gerardiana Wall. ex Stapf	Ephedraceae	root, fruit, stem, seed	5	Decoction	Shrub	0	0	0	0	0	1	1	0	2	0	0	0	0	0	0	0	1	0	0	0	0	0	0	0	0	0	0	0	0
Gahkuch	Ghizer	36.162949°	73.755492°	Soom	Ephedra gerardiana Wall. ex Stapf	Ephedraceae	root, fruit, stem, seed	5	Decoction	Shrub	0	0	0	0	0	1	1	0	2	0	0	0	0	0	0	0	1	0	0	0	0	0	0	0	0	0	0	0	0
Gahkuch	Ghizer	36.162949°	73.755492°	Soom	Ephedra gerardiana Wall. ex Stapf	Ephedraceae	root, fruit, stem, seed	5	Decoction	Shrub	0	0	0	0	0	1	1	0	2	0	0	0	0	0	0	0	1	0	0	0	0	0	0	0	0	0	0	0	0
Gahkuch	Ghizer	36.162949°	73.755492°	Soom	Ephedra gerardiana Wall. ex Stapf	Ephedraceae	whole plant	2	Decoction	Shrub	1	0	0	0	0	0	0	0	1	0	0	0	0	0	0	0	0	0	0	0	0	0	0	0	0	0	0	0	0
Gahkuch	Ghizer	36.162949°	73.755492°	Soom	Ephedra gerardiana Wall. ex Stapf	Ephedraceae	root, fruit, stem, seed	5	Decoction	Shrub	1	0	0	0	0	1	1	0	1	0	0	0	0	0	0	0	1	0	0	0	0	0	0	0	0	0	0	0	0
Gahkuch	Ghizer	36.162949°	73.755492°	Soom	Ephedra gerardiana Wall. ex Stapf	Ephedraceae	whole plant	2	Decoction	Shrub	1	0	0	0	0	0	0	0	1	0	0	0	0	0	0	0	0	0	0	0	0	0	0	0	0	0	0	0	0
Yaseen	Ghizer	36.369354°	73.332552°	Soom	Ephedra gerardiana Wall. ex Stapf	Ephedraceae	root, fruit, stem, seed	5	Decoction	Shrub	1	0	0	0	0	1	1	0	1	0	0	0	0	0	0	0	1	0	0	0	0	0	0	0	0	0	0	0	0
Yaseen	Ghizer	36.369354°	73.332552°	Soom	Ephedra gerardiana Wall. ex Stapf	Ephedraceae	whole plant	4	Decoction	Shrub	1	0	0	0	0	0	1	0	1	0	0	0	0	0	0	0	1	0	0	0	0	0	0	0	0	0	0	0	0
Yaseen	Ghizer	36.369354°	73.332552°	Soom	Ephedra gerardiana Wall. ex Stapf	Ephedraceae	whole plant	3	Decoction	Shrub	1	0	0	0	0	1	0	0	1	0	0	0	0	0	0	0	0	0	0	0	0	0	0	0	0	0	0	0	0
Yaseen	Ghizer	36.369354°	73.332552°	Soom	Ephedra gerardiana Wall. ex Stapf	Ephedraceae	whole plant	4	Decoction	Shrub	1	0	0	0	0	1	0	0	1	0	0	0	0	0	0	0	1	0	0	0	0	0	0	0	0	0	0	0	0
Yaseen	Ghizer	36.369354°	73.332552°	Soom	Ephedra gerardiana Wall. ex Stapf	Ephedraceae	root, fruit, stem, seed	5	Decoction	Shrub	1	0	0	0	0	1	1	0	1	0	0	0	0	0	0	0	1	0	0	0	0	0	0	0	0	0	0	0	0
Bilchar/Bagrote	Gilgit	35.942517°	74.545274°	Soom	Ephedra gerardiana Wall. ex Stapf	Ephedraceae	branches, roots	3	Decoction	Shrub	0	0	1	0	0	0	0	0	2	0	0	0	0	0	0	0	0	0	0	0	0	0	0	0	0	0	0	0	0
Bilchar/Bagrote	Gilgit	35.942517°	74.545274°	Soom	Ephedra gerardiana Wall. ex Stapf	Ephedraceae	branches, roots	3	Decoction	Shrub	0	0	1	0	0	0	0	0	2	0	0	0	0	0	0	0	0	0	0	0	0	0	0	0	0	0	0	0	0
Bilchar/Bagrote	Gilgit	35.942517°	74.545274°	Soom	Ephedra gerardiana Wall. ex Stapf	Ephedraceae	branches, roots	3	Decoction	Shrub	0	0	1	0	0	0	0	0	2	0	0	0	0	0	0	0	0	0	0	0	0	0	0	0	0	0	0	0	0
Bilchar/Bagrote	Gilgit	35.942517°	74.545274°	Soom	Ephedra gerardiana Wall. ex Stapf	Ephedraceae	branches, roots	3	Decoction	Shrub	0	0	1	0	0	0	0	0	2	0	0	0	0	0	0	0	0	0	0	0	0	0	0	0	0	0	0	0	0
Bilchar/Bagrote	Gilgit	35.942517°	74.545274°	Soom	Ephedra gerardiana Wall. ex Stapf	Ephedraceae	branches, roots	3	Decoction	Shrub	0	0	1	0	0	0	0	0	2	0	0	0	0	0	0	0	0	0	0	0	0	0	0	0	0	0	0	0	0
Danyore	Gilgit	35.919880°	74.386181°	Soom	Ephedra gerardiana Wall. ex Stapf	Ephedraceae	branches, roots	1	Decoction	Shrub	0	0	0	0	0	0	0	0	1	0	0	0	0	0	0	0	0	0	0	0	0	0	0	0	0	0	0	0	0
Danyore	Gilgit	35.919880°	74.386181°	Soom	Ephedra gerardiana Wall. ex Stapf	Ephedraceae	branches, roots	1	Decoction	Shrub	0	0	0	0	0	0	0	0	1	0	0	0	0	0	0	0	0	0	0	0	0	0	0	0	0	0	0	0	0
Danyore	Gilgit	35.919880°	74.386181°	Soom	Ephedra gerardiana Wall. ex Stapf	Ephedraceae	branches, roots	3	Decoction	Shrub	0	0	1	0	0	0	0	0	2	0	0	0	0	0	0	0	0	0	0	0	0	0	0	0	0	0	0	0	0
Jalalabad	Gilgit	35.880457°	74.493590°	Soom	Ephedra gerardiana Wall. ex Stapf	Ephedraceae	branches, roots	3	Decoction	Shrub	0	0	1	0	0	0	0	0	2	0	0	0	0	0	0	0	0	0	0	0	0	0	0	0	0	0	0	0	0
Jalalabad	Gilgit	35.880457°	74.493590°	Soom	Ephedra gerardiana Wall. ex Stapf	Ephedraceae	branches, roots	3	Decoction	Shrub	0	0	1	0	0	0	0	0	2	0	0	0	0	0	0	0	0	0	0	0	0	0	0	0	0	0	0	0	0
Jalalabad	Gilgit	35.880457°	74.493590°	Soom	Ephedra gerardiana Wall. ex Stapf	Ephedraceae	branches, roots	2	Decoction	Shrub	0	0	0	0	0	0	0	0	2	0	0	0	0	0	0	0	0	0	0	0	0	0	0	0	0	0	0	0	0
Jalalabad	Gilgit	35.880457°	74.493590°	Soom	Ephedra gerardiana Wall. ex Stapf	Ephedraceae	branches, roots	3	Decoction	Shrub	0	0	1	0	0	0	0	0	2	0	0	0	0	0	0	0	0	0	0	0	0	0	0	0	0	0	0	0	0
Jalalabad	Gilgit	35.880457°	74.493590°	Soom	Ephedra gerardiana Wall. ex Stapf	Ephedraceae	branches, roots	3	Decoction	Shrub	0	0	1	0	0	0	0	0	2	0	0	0	0	0	0	0	0	0	0	0	0	0	0	0	0	0	0	0	0
Jalalabad	Gilgit	35.880457°	74.493590°	Soom	Ephedra gerardiana Wall. ex Stapf	Ephedraceae	branches, roots	3	Decoction	Shrub	0	0	1	0	0	0	0	0	2	0	0	0	0	0	0	0	0	0	0	0	0	0	0	0	0	0	0	0	0
Kargha	Gilgit	35.915251°	74.257648°	Sopt	Ephedra gerardiana Wall. ex Stapf	Ephedraceae	whole plant	2	Decoction	Shrub	1	0	0	0	0	1	0	0	0	0	0	0	0	0	0	0	0	0	0	0	0	0	0	0	0	0	0	0	0
Kargha	Gilgit	35.915251°	74.257648°	Sopt	Ephedra gerardiana Wall. ex Stapf	Ephedraceae	whole plant	2	Decoction	Shrub	1	0	0	0	0	0	0	0	1	0	0	0	0	0	0	0	0	0	0	0	0	0	0	0	0	0	0	0	0
Kargha	Gilgit	35.915251°	74.257648°	Sopt	Ephedra gerardiana Wall. ex Stapf	Ephedraceae	whole plant	2	Decoction	Shrub	1	0	1	0	0	0	0	0	0	0	0	0	0	0	0	0	0	0	0	0	0	0	0	0	0	0	0	0	0
Kargha	Gilgit	35.915251°	74.257648°	Sopt	Ephedra gerardiana Wall. ex Stapf	Ephedraceae	whole plant	3	Decoction	Shrub	1	0	1	0	0	1	0	0	0	0	0	0	0	0	0	0	0	0	0	0	0	0	0	0	0	0	0	0	0
Kargha	Gilgit	35.915251°	74.257648°	Sopt	Ephedra gerardiana Wall. ex Stapf	Ephedraceae	whole plant	3	Decoction	Shrub	0	0	1	0	0	1	0	0	1	0	0	0	0	0	0	0	0	0	0	0	0	0	0	0	0	0	0	0	0
[truncated: 2,540 more rows]
