# Supplementary material for: Regional trade of medicinal plants has facilitated the retention of traditional knowledge: case study in Gilgit-Baltistan Pakistan
Source: J Ethnobiol Ethnomed. 2019 Jan 28;15:6. doi: 10.1186/s13002-018-0281-0 (PMC6348662; doi:10.1186/s13002-018-0281-0)
Supplement: Supplementary file 2 — RFC and UV of species reported from Central Hunza. (XLSX 14 kb) [file 13002_2018_281_MOESM2_ESM.xlsx]

## Sheet: S2_Central Hunza ICF-RFC-UV
	RFC and UV of species reported from Central Hunza
Location	Species	Family	Local name	RFC	UV	ailment categories	# of uses
Hunza	Prunus armeniaca L.	Rosaceae	Jui	0.225	0.0497925	12	241
Hunza	Berberis lycium Royle	Berberidaceae	Ishkeen	0.325	0.042654	9	211
Hunza	Linum usitatissimum L.	Linaceae	Human	0.175	0.0787402	10	127
Hunza	Artemisia maritima L.	Compositae	Zoon	0.4	0.06	6	100
Hunza	Carthamus tinctorius L.	Compositae	Poong	0.275	0.0697674	6	86
Hunza	Morus alba L.	Moraceae	Shae Maroch	0.325	0.0481928	4	83
Hunza	Capsicum annuum L.	Solanaceae	Ma'rooch	0.25	0.0277778	2	72
Hunza	Allium sativum L.	Amaryllidaceae	Bukpa	0.35	0.0625	4	64
Hunza	Mentha spicata L.	Lamiaceae	Podina	0.325	0.031746	2	63
Hunza	Capparis spinosa L.	Capparaceae	Chopir	0.275	0.037037	2	54
Hunza	Raphanus sativus L.	Brassicaceae	Moolo	0.275	0.037037	2	54
Hunza	Thymus serphyllum L.	Lamiaceae	Tumuro	0.175	0.0740741	4	54
Hunza	Elaeagnus angustifolia L.	Elaeagnaceae	Gindawar	0.275	0.0769231	4	52
Hunza	Cannabis sativa L.	Cannabinaeae	Thoonch	0.3	0.0930233	4	43
Hunza	Fagopyrum esculentum Moench	Polygonaceae	Baraw	0.175	0.097561	4	41
Hunza	Ephedra gerardiana Wall. ex Stapf	Ephedraceae	Sopat	0.175	0.0810811	3	37
Hunza	Punica granatum L.	Lythraceae	Danu	0.25	0.114286	4	35
Hunza	Avena sativa L.	Poaceae	Shasher	0.275	0.0588235	2	34
Hunza	Bergenia stracheyi (Hook.f. & Thomson) Engl.	Saxifragaceae	Sasper	0.3	0.0882353	3	34
Hunza	Ficus carica L.	Moraceae	Faak	0.2	0.125	4	32
Hunza	Datura stramonium L.	Solanaceae	Dhatura	0.175	0.0967742	3	31
Hunza	Mentha sylvestris L.	Lamiaceae	Bundoo	0.25	0.0666667	2	30
Hunza	Morus nigra L.	Moraceae	Kini Maroch	0.225	0.1	3	30
Hunza	Rosa webbiana Wall. ex Royle	Rosaceae	Shighaye	0.325	0.0689655	2	29
Hunza	Salix babylonica L.	Salicaceae	Mu'choor	0.125	0.142857	4	28
Hunza	Taraxacum officinale (L.) Weber ex F.H.Wigg.	Compositae	Shikinachi	0.225	0.142857	4	28
Hunza	Coriandrum sativum L.	Apiaceae	Naski	0.2	0.0740741	2	27
Hunza	Papaver somniferum L.	Papaveraceae	Mardakhaw	0.175	0.115385	3	26
Hunza	Citrullus vulgaris Schrad.	Cucurbitaceae	Bowar	0.225	0.0454545	1	22
Hunza	Curcuma longa L.	Zingiberacaceae	Halichi	0.2	0.0909091	2	22
Hunza	Peganum harmala L.	Nitrariaceae	Supandour	0.3	0.0909091	2	22
Hunza	Prunus dulcis (Mill.) D.A.Webb	Rosaceae	Balth	0.2	0.0909091	2	22
Hunza	Allium cepa L.	Amaryllidaceae	Ghashoo	0.225	0.0952381	2	21
Hunza	Betula utilis D.Don	Betulaceae	Xuxi	0.2	0.0952381	2	21
Hunza	Chenopodium album L.	Amaranthaceae	Kunoaw	0.225	0.111111	2	18
Hunza	Juglans regia L.	Juglandaceae	Aachhow	0.225	0.0555556	1	18
Hunza	Sophora mollis (Royle) Baker	Leguminosae	Pushool	0.15	0.166667	3	18
Hunza	Abelmoschus esculentus (L.) Moench	Malvaceae	Bhindi	0.275	0.0588235	1	17
Hunza	Astragalus psilocentros Fisch.	Leguminosae	Hapoocho	0.175	0.142857	2	14
Hunza	Echinops echinatus Roxb.	Compositae	Jacheer	0.15	0.0714286	1	14
Hunza	Salix tetrasperma Roxb.	Salicaceae	Bew	0.125	0.0714286	1	14
Hunza	Trifolium pratense L.	Leguminosae	Jangli Shaftl	0.175	0.0714286	1	14
Hunza	Viola serpens Wall. ex Ging.	Violaceae	Lillo	0.275	0.142857	2	14
Hunza	Elaeagnus rhamnoides (L.) A.Nelson	Elaeagnaceae	Chanso	0.225	0.0909091	1	11
Hunza	Rheum emodi	Polygonaceae	Chontal	0.15	0.181818	2	11
Hunza	Rosa indica L.	Rosaceae	Ghulab	0.275	0.0909091	1	11
Hunza	Cichorium intybus L.	Compositae	Qarali Chicknachi	0.175	0.142857	1	7
Hunza	Daucus carota L.	Apiaceae	Ghasoon	0.175	0.142857	1	7
Hunza	Mirabilis jalapa L.	Nyctaginaceae	Gul-e-Abbas	0.2	0.142857	1	7
Hunza	Perovskia abrotanoides Kar.	Lamiaceae	Faring bursay	0.175	0.142857	1	7
Hunza	Pistacia mutica Fisch. & C.A.Mey.	Anacardiaceae	Daraaw	0.2	0.142857	1	7
Hunza	Plantago major L.	Plantaginaceae	Shiltive	0.175	0.142857	1	7
Hunza	Populus alba L.	Salicaceae	Turaq	0.125	0.142857	1	7
Hunza	Populus nigra L.	Salicaceae	Jerpa	0.15	0.142857	1	7
Hunza	Tanacetum gracile Hook.f. & Thomson	Compositae	Bursay	0.2	0.142857	1	7
Hunza	Tribulus terrestris L.	Zygophyllaceae	Huk-gu-Kurice	0.125	0.142857	1	7
Hunza	Zea mays L.	Poaceae	Makayee	0.125	0.142857	1	7
Hunza	Brassica oleracea var. botrytis L.	Brassicaceae	Phul Gobi	0.175	0.166667	1	6
Hunza	Brassica oleracea var. capitata L.	Brassicaceae	Band Gobi	0.15	0.166667	1	6
