# Supplementary material for: Regional trade of medicinal plants has facilitated the retention of traditional knowledge: case study in Gilgit-Baltistan Pakistan
Source: J Ethnobiol Ethnomed. 2019 Jan 28;15:6. doi: 10.1186/s13002-018-0281-0 (PMC6348662; doi:10.1186/s13002-018-0281-0)
Supplement: Supplementary file 8 — RFC and UV of species reported from Skardu. (XLSX 19 kb) [file 13002_2018_281_MOESM8_ESM.xlsx]

## Sheet: S8_Skardu ICF-RFC-UV
	RFC and UV of species reported from Skardu
Location	Species	Family	Local name	RFC	UV	ailment categories	# of uses
Skardu	Berberis lycium Royle	Berberidaceae	Skyurboo	0.466667	0.0761905	8	105
Skardu	Prunus armeniaca L.	Rosaceae	Chooli	0.3	0.0776699	8	103
Skardu	Dracocephalum nuristanicum Rech.f. & Edelb.	Lamiaceae	Shamdun	0.7	0.0649351	5	77
Skardu	Ephedra gerardiana Wall. ex Stapf	Ephedraceae	Say	0.5	0.0877193	5	57
Skardu	Delphinium brunonianum Royle	Ranunculaceae	Makhoting	0.466667	0.0892857	5	56
Skardu	Berberis brandisiana Ahrendt	Berberidaceae	Ishkeen	0.3	0.185185	10	54
Skardu	Capparis spinosa L.	Capparaceae	Kraba	0.433333	0.0740741	4	54
Skardu	Mentha royleana Wall. ex Benth.	Lamiaceae	Foling	0.466667	0.0816327	4	49
Skardu	Berberis pseudumbellata R.Parker	Berberidaceae	Shokurum	0.6	0.0638298	3	47
Skardu	Potentilla bifurca L.	Rosaceae	Tarqan	0.466667	0.0638298	3	47
Skardu	Perovskia abrotanoides Kar.	Lamiaceae	Pharring bursay	0.233333	0.0930233	4	43
Skardu	Bergenia ciliata (Haw.) Sternb.	Saxifragaceae	Shaphus	0.266667	0.142857	6	42
Skardu	Potentilla salesoviana Steph.	Rosaceae	Karfo mindoq	0.233333	0.0714286	3	42
Skardu	Elaeagnus rhamnoides (L.) A.Nelson	Elaeagnaceae	Soq/Rema	0.466667	0.142857	5	35
Skardu	Astragalus psilocentros Fisch.	Leguminosae	Biacharchoo	0.4	0.117647	4	34
Skardu	Nepeta leucolaena Benth. ex Hook.f.	Lamiaceae	Askuta	0.366667	0.0357143	1	28
Skardu	Juniperus excelsa M.Bieb.	Cupressaceae	Hlashuk	0.366667	0.111111	3	27
Skardu	Prunella vulgaris L.	Lamiaceae	Harswa	0.466667	0.153846	4	26
Skardu	Bergenia stracheyi (Hook.f. & Thomson) Engl.	Saxifragaceae	Khichlay	0.266667	0.2	5	25
Skardu	Plantago lanceolata L.	Plantaginaceae	Sman Hrswa	0.366667	0.0833333	2	24
Skardu	Artemisia brevifolia Wall	Compositae	Bursay	0.4	0.136364	3	22
Skardu	Stachys tibetica Vatke	Lamiaceae	Khampa	0.333333	0.0454545	1	22
Skardu	Allium carolinianum DC.	Amaryllidaceae	Chong	0.3	0.238095	5	21
Skardu	Polygonum affine D. Don.	Polygonaceae	Strin mindoq	0.4	0.142857	3	21
Skardu	Rheum australe D. Don	Polygonaceae	Lachu	0.433333	0.190476	4	21
Skardu	Thymus linearis Benth.	Lamiaceae	Tumburu	0.233333	0.0952381	2	21
Skardu	Berberis orthobotrys Bien. ex Aitch.	Berberidaceae	Skyurboo	0.4	0.1	2	20
Skardu	Chenopodium album L.	Amaranthaceae	Snew	0.266667	0.15	3	20
Skardu	Pimpinella diversifolia DC.	Apiaceae	Kohniod	0.366667	0.15	3	20
Skardu	Primula denticulata Sm.	Primulaceae	Daoo	0.4	0.2	4	20
Skardu	Rhododendron anthopogon D. Don	Ericaceae	Chauman	0.3	0.15	3	20
Skardu	Leontopodium leontopodinum	Asteraceae	Naqposhoto	0.433333	0.105263	2	19
Skardu	Pedicularis pectinatiformis Bonati	Orobanchaceae	Sunpo spanthing	0.233333	0.157895	3	19
Skardu	Polygonum tataricum L.	Polygonaceae	Bro Kho-Bro	0.233333	0.157895	3	19
Skardu	Senecio chrysanthemoides DC.	Compositae	Api mindoq	0.233333	0.157895	3	19
Skardu	Swertia petiolata D. Don	Gentianaceae	Brama	0.233333	0.210526	4	19
Skardu	Aquilegia pubiflora Wall. Ex Royle	Ranunculaceae	Koo-kuk	0.233333	0.111111	2	18
Skardu	Berberis vulgaris L.	Berberidaceae	Shuturum	0.233333	0.166667	3	18
Skardu	Foeniculum vulgare Mill.	Apiaceae	Badiyan	0.3	0.0555556	1	18
Skardu	Rhodiola imbricata Edgew.	Crassulaceae	Chundol	0.233333	0.222222	4	18
Skardu	Tanacetum senecionis (Jacquem. ex Besser) J.Gay ex DC.	Compositae	Hilteree/Tialo	0.4	0.166667	3	18
Skardu	Trigonella foenum-graecum L.	Leguminosae	Shamilik	0.233333	0.111111	2	18
Skardu	Allium humile Kunth	Amaryllidaceae	Chung	0.266667	0.176471	3	17
Skardu	Geranium nepalense Sweet	Geraniaceae	Bamik	0.3	0.235294	4	17
Skardu	Rosa webbiana Wall. ex Royle	Rosaceae	Sia marpho	0.233333	0.117647	2	17
Skardu	Aconitum violaceum Jacquem. Ex. Stapf	Ranunculaceae	Booma	0.233333	0.25	4	16
Skardu	Mentha arvensis L.	Lamiaceae	Peeno	0.266667	0.0625	1	16
Skardu	Thymus serphyllum L.	Lamiaceae	Ree tumburuk	0.366667	0.125	2	16
Skardu	Urtica dioica L.	Urticaceae	Khaeshing	0.266667	0.1875	3	16
Skardu	Aquilegia fragrans Benth.	Ranunculaceae	Karfo Koo-kuk	0.233333	0.133333	2	15
Skardu	Dysphania botrys (L.) Mosyakin & Clemants	Amaranthaceae	Khama	0.233333	0.2	3	15
Skardu	Lepidium latifolium L.	Brassicaceae	Chunma	0.4	0.2	3	15
Skardu	Oxyria digyna (L.) Hill	Polygonaceae	Span Harswa	0.266667	0.133333	2	15
Skardu	Ribes alpestre Wall. ex Decne.	Grossulariaceae	Skioruru	0.233333	0.133333	2	15
Skardu	Bistorta amplexicaulis (D.Don) Greene	Polygonaceae	Onbu	0.266667	0.214286	3	14
Skardu	Epilobium latifolium L.	Onagraceae	Pondol	0.233333	0.0714286	1	14
Skardu	Heracleum candicans Wall. ex DC.	Apiaceae	Ghang	0.266667	0.0714286	1	14
Skardu	Jurinea dolomiaea Boiss.	Compositae	Sathing	0.233333	0.214286	3	14
Skardu	Mentha haplocalyx Briq.	Lamiaceae	Shoma	0.3	0.214286	3	14
Skardu	Primula farinose L.	Primulaceae	Spangpunar	0.366667	0.142857	2	14
Skardu	Rheum spiciforme Royle	Polygonaceae	Khakhol	0.266667	0.214286	3	14
Skardu	Rosa indica L.	Rosaceae	Ghulab	0.4	0.0714286	1	14
Skardu	Sophora mollis (Royle) Baker	Leguminosae	Khakhul	0.366667	0.0714286	1	14
Skardu	Tanacetum gracile Hook.f. & Thomson	Compositae	Serfo Bursay	0.333333	0.142857	2	14
Skardu	Thalictrum foliolosum DC.	Ranunculaceae	Momyrun	0.4	0.142857	2	14
Skardu	Trifolium fragiferum L.	Leguminosae	Gul-e-nasreen	0.233333	0.142857	2	14
Skardu	Trifolium pratense L.	Leguminosae	Ol	0.266667	0.0714286	1	14
Skardu	Allardia tomentosa Decne.	Asteraceae	Tarkham	0.2	0.230769	3	13
Skardu	Avena sativa L.	Poaceae	Nas Choo	0.266667	0.230769	3	13
Skardu	Carum carvi L.	Apiaceae	Zera	0.2	0.230769	3	13
Skardu	Cerastium fontanum Baumg.	Caryophyllaceae	Bloghar	0.233333	0.153846	2	13
Skardu	Cichorium intybus L.	Compositae	Shantha	0.233333	0.230769	3	13
Skardu	Berberis parkeriana C.K.Schneid.	Berberidaceae	Skyurboo	0.333333	0.166667	2	12
Skardu	Buxus papillosa C.K. Schneid	Buxaceae	Angaroo	0.233333	0.0833333	1	12
Skardu	Juniperus communis L.	Cupressaceae	Oshuk	0.4	0.25	3	12
Skardu	Pedicularis cheilanthifolia Schrenk	Orobanchaceae	Serfo spanthing	0.3	0.166667	2	12
Skardu	Peganum harmala L.	Nitrariaceae	Isman	0.466667	0.0833333	1	12
Skardu	Rumex chalepensis Mill.	Polygonaceae	Sa-shing	0.266667	0.0833333	1	12
Skardu	Taraxacum officinale (L.) Weber ex F.H.Wigg.	Compositae	Shantha	0.233333	0.166667	2	12
Skardu	Viola serpens Wall. ex Ging.	Violaceae	Skora mindoq	0.3	0.166667	2	12
Skardu	Artemisia sieversiana Ehrh.	Compositae	Khampa	0.2	0.272727	3	11
Skardu	Berberis stewartiana Jafri	Berberidaceae	Shokurum	0.2	0.272727	3	11
Skardu	Betula utilis D.Don	Betulaceae	Staqpa	0.2	0.181818	2	11
Skardu	Cicer microphyllum Benth.	Leguminosae	Stranjungstwa	0.233333	0.0909091	1	11
Skardu	Descurainia sophia (L.) Webb ex Prantl	Brassicaceae	Khashir	0.3	0.181818	2	11
Skardu	Fagopyrum esculentum Moench	Polygonaceae	Ghiawas, sta-Bro	0.233333	0.181818	2	11
Skardu	Tanacetum falconeri Hook.f.	Compositae	Haltiry/Htialo/Pholing/Zoon	0.233333	0.181818	2	11
Skardu	Artemisia maritima L.	Compositae	Bursay	0.2	0.1	1	10
Skardu	Artemisia santolinifolia Turcz. Ex Krasch.	Compositae	Kho Bursay	0.266667	0.2	2	10
Skardu	Cuscuta reflexa Roxb.	Convolvulaceae	Ghbul thaq	0.3	0.2	2	10
Skardu	Polygonum hydropiper L.	Polygonaceae	Thangmarcy	0.3	0.2	2	10
Skardu	Prunus persica (L.) Batsch	Rosaceae	Takushu Choo	0.3	0.2	2	10
Skardu	Aconitum nepellus L.	Ranunculaceae	Booma	0.2	0.222222	2	9
Skardu	Berberis ulicina Hook.f. & Thomson	Berberidaceae	Shokurum	0.2	0.222222	2	9
Skardu	Artemisia scoparia Waldst. & Kitam.	Compositae	Khobustae	0.233333	0.25	2	8
Skardu	Astragalus zanskarensis Bunge	Leguminosae	Shukpa	0.2	0.25	2	8
Skardu	Bistorta affinis (D.Don) Greene	Polygonaceae	Buma	0.233333	0.142857	1	7
Skardu	Brassica juncea (L.) Czern.	Brassicaceae	Sarsung mar	0.233333	0.142857	1	7
Skardu	Codonopsis clematidea (Schrenk) C.B.Clarke	Campanulaceae	Bajo mindoq	0.266667	0.142857	1	7
Skardu	Coriandrum sativum L.	Apiaceae	Ausu	0.266667	0.142857	1	7
Skardu	Cousinia thomsonii C.B.Clarke	Compositae	Charchu	0.266667	0.142857	1	7
Skardu	Crocus sativus L.	Iridaceae	Zafran	0.233333	0.142857	1	7
Skardu	Daucus carota L.	Apiaceae	Gholafuvi lona	0.266667	0.142857	1	7
Skardu	Equisetum arvense L.	Equisetaceae	Thangshingy harswa	0.266667	0.142857	1	7
Skardu	Gentiana olivieri Griseb.	Gentianaceae	Tikta	0.266667	0.142857	1	7
Skardu	Heracleum pinnatum C.B. Clarke	Apiaceae	Hltireet	0.366667	0.142857	1	7
Skardu	Hordeum vulgare L.	Poaceae	Cha Fay	0.466667	0.142857	1	7
Skardu	Hyoscyamus niger L.	Solanaceae	Landungstwa	0.4	0.142857	1	7
Skardu	Juglans regia L.	Juglandaceae	Aachhow	0.433333	0.142857	1	7
Skardu	Lonicera asperifolia Hook. f. & Thomson	Caprifoliaceae	Krraba	0.366667	0.142857	1	7
Skardu	Malus domestica Borkh.	Rosaceae	Skamkooshu	0.366667	0.142857	1	7
Skardu	Plantago major L.	Plantaginaceae	Boqna	0.4	0.142857	1	7
Skardu	Pleurospermum candollei (DC.) C.B. Clarke in Hook. f.	Apiaceae	Braqshundun	0.4	0.142857	1	7
Skardu	Potentilla argyrophylla Wall. ex Lehm.	Rosaceae	Serfo Harswa	0.466667	0.142857	1	7
Skardu	Prunus dulcis (Mill.) D.A.Webb	Rosaceae	Stargi mar	0.266667	0.142857	1	7
Skardu	Pseudognaphalium luteoalbum (L.) Hilliard & B. L. Burtt	Compositae	Thliri	0.366667	0.142857	1	7
Skardu	Pulsatilla wallichiana (Royle) Ulbr.	Ranunculaceae	Zgiongmonana Loqparimandoq	0.4	0.142857	1	7
Skardu	Punica granatum L.	Lythraceae	Sio	0.4	0.142857	1	7
Skardu	Raphanus sativus L.	Brassicaceae	Gholafuvi sonma	0.5	0.142857	1	7
Skardu	Rosa brunonii Lindl.	Rosaceae	Siya	0.3	0.142857	1	7
Skardu	Seriphidium brevifolium (Wall. ex DC.) Ling & Y.R.Ling	Compositae	Bursay	0.466667	0.142857	1	7
Skardu	Tribulus terrestris L.	Zygophyllaceae	Cocoloq/Cocoring	0.233333	0.142857	1	7
Skardu	Valeriana wallichii DC.	Caprifoliaceae	Mushk-bala	0.4	0.142857	1	7
Skardu	Allium cepa L.	Amaryllidaceae	Song	0.2	0.166667	1	6
Skardu	Allium sativum L.	Amaryllidaceae	Zgoqpa	0.2	0.166667	1	6
Skardu	Artemisia fragrans Willd	Compositae	Kho Bursay	0.266667	0.166667	1	6
Skardu	Canvolvulus arvensis L.	Convolvulaceae	Thringthringmo	0.266667	0.166667	1	6
